# Supplementary material for: Non-Apoptotic Caspase Activity Preferentially Targets a Novel Consensus Sequence Associated With Cytoskeletal Proteins in the Developing Auditory Brainstem
Source: Front Cell Dev Biol. 2022 Mar 7;10:844844. doi: 10.3389/fcell.2022.844844 (PMC8940215; doi:10.3389/fcell.2022.844844)
Supplement: Supplementary file 1 [file Table2.XLSX]

## Sheet: GRD vs All
Category	Term	Count	%	Genes	List Total	Pop Hits	Pop Total	Fold Enrichment	p-value
GOTERM_MF_DIRECT	GO:0005200~structural constituent of cytoskeleton	6	6.38298	A0A1D5PJY1, F1NJ08, A0A1D5PAX1, Q90WD0, P09244, A0A1D5NW27	78	6	277	3.55128	0.000216163
GOTERM_BP_DIRECT	GO:0006107~oxaloacetate metabolic process	4	4.25532	P00508, P00504, Q5ZME2, F1P269	80	4	279	3.4875	0.00320062
GOTERM_BP_DIRECT	GO:0006094~gluconeogenesis	6	6.38298	F1NU17, P00508, P00504, R4GM10, A0A1L1RKH8, F1NH87	80	8	279	2.61563	0.00440072
GOTERM_BP_DIRECT	GO:0007420~brain development	3	3.19149	R4GL78, Q71SG2, Q05423	80	3	279	3.4875	0.0114724
GOTERM_CC_DIRECT	GO:0005886~plasma membrane	19	20.2128	P53478, R4GL78, E1C7B5, P28685, F1NJ08, Q90705, A0A1D5P6Q5, Q03696, F1NH87, F1NSL7, P00508, Q5ZKK4, E1BRL4, P09102, F1N9T0, F1NW43, F1P269, Q5ZL72, Q5ZKS0	84	41	290	1.59988	0.0119443
GOTERM_BP_DIRECT	GO:0006096~glycolytic process	5	5.31915	F1NU17, F1NW43, R4GM10, A0A1L1RKH8, F1NH87	80	7	279	2.49107	0.0123866
GOTERM_CC_DIRECT	GO:0043025~neuronal cell body	6	6.38298	E1C7B5, P28685, Q71SG2, A0A1D5NZU2, Q05423, Q5ZL72	84	10	290	2.07143	0.0225146
GOTERM_MF_DIRECT	GO:0003735~structural constituent of ribosome	2	2.12766	A0A1D5NVI1, F1NTT2	78	24	277	0.29594	0.0238613
GOTERM_MF_DIRECT	GO:0030170~pyridoxal phosphate binding	3	3.19149	P00508, E1BSN7, P00504	78	4	277	2.66346	0.037479
GOTERM_MF_DIRECT	GO:0003725~double-stranded RNA binding	3	3.19149	F1NJ08, F1NHI3, Q5ZL72	78	4	277	2.66346	0.037479
GOTERM_MF_DIRECT	GO:0003779~actin binding	3	3.19149	P62758, C7G537, F1NHT3	78	4	277	2.66346	0.037479
GOTERM_MF_DIRECT	GO:0004069~L-aspartate:2-oxoglutarate aminotransferase activity	2	2.12766	P00508, P00504	78	2	277	3.55128	0.0392795
GOTERM_MF_DIRECT	GO:0080130~L-phenylalanine:2-oxoglutarate aminotransferase activity	2	2.12766	P00508, P00504	78	2	277	3.55128	0.0392795
GOTERM_BP_DIRECT	GO:0098779~mitophagy in response to mitochondrial depolarization	3	3.19149	E1C7B5, Q5ZME2, A0A1D5NYM1	80	4	279	2.61563	0.0394882
GOTERM_BP_DIRECT	GO:0007411~axon guidance	3	3.19149	P28685, Q71SG2, Q03696	80	4	279	2.61563	0.0394882
GOTERM_BP_DIRECT	GO:0000122~negative regulation of transcription from RNA polymerase II promoter	3	3.19149	A0A1D5P8I3, A0A1D5NW46, Q5ZME1	80	4	279	2.61563	0.0394882
GOTERM_MF_DIRECT	GO:0005524~ATP binding	16	17.0213	A0A1D5PFJ6, P53478, F1NHI3, F1NIM4, A0A1D5NZU2, Q90WD0, Q5F491, A0A1D5NYM1, F1NWH9, F1NU17, Q9I8D6, A0A1D5NUC1, F1NW43, F1P269, Q5ZL72, F1NZ30	78	37	277	1.53569	0.0400634
GOTERM_CC_DIRECT	GO:0030529~intracellular ribonucleoprotein complex	3	3.19149	A0A1D5PFJ6, A0A1D5P9A5, F1NH87	84	4	290	2.58929	0.0406863
GOTERM_CC_DIRECT	GO:0005911~cell-cell junction	3	3.19149	F1NSL7, Q90WD0, Q05423	84	4	290	2.58929	0.0406863
GOTERM_CC_DIRECT	GO:0016023~cytoplasmic, membrane-bounded vesicle	3	3.19149	F1NBV0, E1C4M6, F1N998	84	4	290	2.58929	0.0406863
GOTERM_BP_DIRECT	GO:0016310~phosphorylation	2	2.12766	F1NU17, F1NZ30	80	2	279	3.4875	0.0407416
GOTERM_BP_DIRECT	GO:0006754~ATP biosynthetic process	2	2.12766	A0A1L1RVM8, F1NZ30	80	2	279	3.4875	0.0407416
GOTERM_BP_DIRECT	GO:0042110~T cell activation	2	2.12766	F1NNS1, Q5ZL72	80	2	279	3.4875	0.0407416
GOTERM_BP_DIRECT	GO:0006532~aspartate biosynthetic process	2	2.12766	P00508, P00504	80	2	279	3.4875	0.0407416
GOTERM_BP_DIRECT	GO:0019551~glutamate catabolic process to 2-oxoglutarate	2	2.12766	P00508, P00504	80	2	279	3.4875	0.0407416
GOTERM_BP_DIRECT	GO:0006536~glutamate metabolic process	2	2.12766	P00508, P00504	80	2	279	3.4875	0.0407416
GOTERM_BP_DIRECT	GO:0007010~cytoskeleton organization	2	2.12766	Q71SG2, P09244	80	2	279	3.4875	0.0407416
GOTERM_BP_DIRECT	GO:0007017~microtubule-based process	2	2.12766	P09244, A0A1D5NW27	80	2	279	3.4875	0.0407416
GOTERM_BP_DIRECT	GO:0034314~Arp2/3 complex-mediated actin nucleation	2	2.12766	Q90WD0, Q5ZJI7	80	2	279	3.4875	0.0407416
GOTERM_BP_DIRECT	GO:0006520~cellular amino acid metabolic process	2	2.12766	P00508, P00504	80	2	279	3.4875	0.0407416
GOTERM_BP_DIRECT	GO:0070932~histone H3 deacetylation	2	2.12766	A0A1D5P8I3, A0A1D5NW46	80	2	279	3.4875	0.0407416
GOTERM_BP_DIRECT	GO:0007612~learning	2	2.12766	P28685, F1NLH0	80	2	279	3.4875	0.0407416
GOTERM_BP_DIRECT	GO:0071346~cellular response to interferon-gamma	2	2.12766	A0A1D5PJG4, F1NH87	80	2	279	3.4875	0.0407416
GOTERM_BP_DIRECT	GO:0006533~aspartate catabolic process	2	2.12766	P00508, P00504	80	2	279	3.4875	0.0407416
GOTERM_BP_DIRECT	GO:0019550~glutamate catabolic process to aspartate	2	2.12766	P00508, P00504	80	2	279	3.4875	0.0407416
GOTERM_BP_DIRECT	GO:0006531~aspartate metabolic process	2	2.12766	P00508, P00504	80	2	279	3.4875	0.0407416
GOTERM_BP_DIRECT	GO:0031032~actomyosin structure organization	2	2.12766	E1BSX2, A0A1D5PAX1	80	2	279	3.4875	0.0407416
GOTERM_BP_DIRECT	GO:0006811~ion transport	2	2.12766	A0A1D5P4L7, P01012	80	2	279	3.4875	0.0407416
GOTERM_CC_DIRECT	GO:0031252~cell leading edge	2	2.12766	F1NJ08, F1NN08	84	2	290	3.45238	0.0415941
GOTERM_CC_DIRECT	GO:0065010~extracellular membrane-bounded organelle	2	2.12766	A0A1L1RVM8, F1NZ30	84	2	290	3.45238	0.0415941
GOTERM_CC_DIRECT	GO:0042382~paraspeckles	2	2.12766	A0A1D5P8I3, A0A1D5P9A5	84	2	290	3.45238	0.0415941
GOTERM_CC_DIRECT	GO:0005885~Arp2/3 protein complex	2	2.12766	Q90WD0, Q5ZJI7	84	2	290	3.45238	0.0415941
GOTERM_CC_DIRECT	GO:0015630~microtubule cytoskeleton	2	2.12766	F1NH87, F1NHT3	84	2	290	3.45238	0.0415941
GOTERM_CC_DIRECT	GO:0097452~GAIT complex	2	2.12766	A0A1D5PJG4, F1NH87	84	2	290	3.45238	0.0415941
GOTERM_BP_DIRECT	GO:0006412~translation	2	2.12766	F1NTT2, Q90705	80	20	279	0.34875	0.0550594
GOTERM_CC_DIRECT	GO:0009986~cell surface	6	6.38298	F1NSL7, E1C7B5, P28685, E1C4M6, Q5ZL72, P26007	84	11	290	1.88312	0.0610717
GOTERM_MF_DIRECT	GO:0003746~translation elongation factor activity	3	3.19149	P84172, Q90705, F1N9H4	78	5	277	2.13077	0.0804515
GOTERM_CC_DIRECT	GO:0070062~extracellular exosome	46	48.9362	P70081, Q5F3C9, R4GL78, Q71SG2, F1NTT2, Q5ZME2, R4GM10, Q5ZME1, F1NHT3, A0A1D5NYM1, Q5ZJI7, A0A1D5PJY1, A0A1L1RVM8, P00508, E1BRL4, E1BSN7, P00504, F1NU56, P62758, F1P269, F1NLL4, Q5ZL72, P21566, Q5ZJV5, F1NZ30, A0A1D5PFJ6, Q90965, F1NJ08, Q90705, F1NIM4, Q90WD0, A0A1D5P6Q5, A0A1L1RKH8, F1NH87, F1NCZ2, F1NBV0, Q9I8D6, A0A1D5NUC1, E1C4M6, P09102, F1NN08, F1NW43, C7G537, Z4YJB8, Q5ZKS0, F1N998	84	136	290	1.16772	0.081134
GOTERM_CC_DIRECT	GO:0005856~cytoskeleton	3	3.19149	P53478, A0A1D5PAX1, F1NHT3	84	5	290	2.07143	0.0868736
GOTERM_MF_DIRECT	GO:0000166~nucleotide binding	9	9.57447	A0A1D5P892, A0A1D5P8I3, A0A1D5PJG4, A0A1D5P359, A0A1D5P954, F1NLH0, A0A1D5P9A5, Q5ZME1, A0A1L1RY47	78	20	277	1.59808	0.0949826
GOTERM_CC_DIRECT	GO:0005623~cell	7	7.44681	F1NU17, F1NJ08, E1BSN7, F1NIM4, A0A1D5P6Q5, E1C6D1, A0A1D5P4L7	84	14	290	1.72619	0.100058
GOTERM_MF_DIRECT	GO:0031625~ubiquitin protein ligase binding	2	2.12766	Q5ZL72, F1NZ30	78	3	277	2.36752	0.106983
GOTERM_MF_DIRECT	GO:0001948~glycoprotein binding	2	2.12766	P28685, F1NJ08	78	3	277	2.36752	0.106983
GOTERM_MF_DIRECT	GO:0000980~RNA polymerase II distal enhancer sequence-specific DNA binding	2	2.12766	A0A1D5P8I3, A0A1D5NW46	78	3	277	2.36752	0.106983
GOTERM_MF_DIRECT	GO:0003676~nucleic acid binding	5	5.31915	A0A1D5P892, A0A1D5PJG4, F1NHI3, A0A1D5P954, Q5F491	78	10	277	1.77564	0.108753
GOTERM_BP_DIRECT	GO:0006101~citrate metabolic process	2	2.12766	A0A1D5PLS2, F1P269	80	3	279	2.325	0.110752
GOTERM_BP_DIRECT	GO:0000398~mRNA splicing, via spliceosome	2	2.12766	F1NHI3, Q5ZME1	80	3	279	2.325	0.110752
GOTERM_BP_DIRECT	GO:0015031~protein transport	2	2.12766	F1NCZ2, Q90965	80	3	279	2.325	0.110752
GOTERM_BP_DIRECT	GO:0030855~epithelial cell differentiation	2	2.12766	E1BSX2, R4GM10	80	3	279	2.325	0.110752
GOTERM_BP_DIRECT	GO:0012501~programmed cell death	2	2.12766	Q05744, F1NW43	80	3	279	2.325	0.110752
GOTERM_BP_DIRECT	GO:0006103~2-oxoglutarate metabolic process	2	2.12766	P00508, P00504	80	3	279	2.325	0.110752
GOTERM_BP_DIRECT	GO:0090666~scaRNA localization to Cajal body	2	2.12766	Q9I8D6, A0A1D5NUC1	80	3	279	2.325	0.110752
GOTERM_BP_DIRECT	GO:0030042~actin filament depolymerization	2	2.12766	Z4YJB8, P21566	80	3	279	2.325	0.110752
GOTERM_BP_DIRECT	GO:0098792~xenophagy	2	2.12766	E1C7B5, Q5ZME2	80	3	279	2.325	0.110752
GOTERM_BP_DIRECT	GO:0042026~protein refolding	2	2.12766	A0A1D5PFJ6, Q5ZL72	80	3	279	2.325	0.110752
GOTERM_BP_DIRECT	GO:0017148~negative regulation of translation	2	2.12766	A0A1D5PJG4, F1NH87	80	3	279	2.325	0.110752
GOTERM_BP_DIRECT	GO:0016042~lipid catabolic process	2	2.12766	F1NBV0, R4GL78	80	3	279	2.325	0.110752
GOTERM_BP_DIRECT	GO:0002230~positive regulation of defense response to virus by host	2	2.12766	E1C7B5, Q5ZME2	80	3	279	2.325	0.110752
GOTERM_BP_DIRECT	GO:0006633~fatty acid biosynthetic process	2	2.12766	F1P269, A0A1D5P6Q5	80	3	279	2.325	0.110752
GOTERM_CC_DIRECT	GO:0005576~extracellular region	2	2.12766	A0A1D5NXD7, P01012	84	3	290	2.30159	0.112939
GOTERM_CC_DIRECT	GO:0005764~lysosome	2	2.12766	F1NBV0, Q05744	84	3	290	2.30159	0.112939
GOTERM_CC_DIRECT	GO:0042995~cell projection	2	2.12766	F1NJ08, Q05423	84	3	290	2.30159	0.112939
GOTERM_CC_DIRECT	GO:0022625~cytosolic large ribosomal subunit	1	1.06383	A0A1D5NVI1	84	11	290	0.313853	0.135367
GOTERM_MF_DIRECT	GO:0035605~peptidyl-cysteine S-nitrosylase activity	1	1.06383	F1NH87	78	1	277	3.55128	0.140794
GOTERM_MF_DIRECT	GO:0036440~citrate synthase activity	1	1.06383	A0A1D5PLS2	78	1	277	3.55128	0.140794
GOTERM_MF_DIRECT	GO:0035198~miRNA binding	1	1.06383	Q5ZME1	78	1	277	3.55128	0.140794
GOTERM_MF_DIRECT	GO:0016212~kynurenine-oxoglutarate transaminase activity	1	1.06383	P00508	78	1	277	3.55128	0.140794
GOTERM_MF_DIRECT	GO:0047117~enoyl-[acyl-carrier-protein] reductase (NADPH, A-specific) activity	1	1.06383	A0A1D5P6Q5	78	1	277	3.55128	0.140794
GOTERM_MF_DIRECT	GO:0004314~[acyl-carrier-protein] S-malonyltransferase activity	1	1.06383	A0A1D5P6Q5	78	1	277	3.55128	0.140794
GOTERM_MF_DIRECT	GO:0031177~phosphopantetheine binding	1	1.06383	A0A1D5P6Q5	78	1	277	3.55128	0.140794
GOTERM_MF_DIRECT	GO:0004579~dolichyl-diphosphooligosaccharide-protein glycotransferase activity	1	1.06383	F1NNS1	78	1	277	3.55128	0.140794
GOTERM_MF_DIRECT	GO:1990247~N6-methyladenosine-containing RNA binding	1	1.06383	Q5ZME1	78	1	277	3.55128	0.140794
GOTERM_MF_DIRECT	GO:0005484~SNAP receptor activity	1	1.06383	E1BRL4	78	1	277	3.55128	0.140794
GOTERM_MF_DIRECT	GO:0050661~NADP binding	1	1.06383	F1NH87	78	1	277	3.55128	0.140794
GOTERM_MF_DIRECT	GO:0002039~p53 binding	1	1.06383	Q5ZL72	78	1	277	3.55128	0.140794
GOTERM_MF_DIRECT	GO:0003878~ATP citrate synthase activity	1	1.06383	F1P269	78	1	277	3.55128	0.140794
GOTERM_MF_DIRECT	GO:0004609~phosphatidylserine decarboxylase activity	1	1.06383	P00504	78	1	277	3.55128	0.140794
GOTERM_MF_DIRECT	GO:0004319~enoyl-[acyl-carrier-protein] reductase (NADPH, B-specific) activity	1	1.06383	A0A1D5P6Q5	78	1	277	3.55128	0.140794
GOTERM_MF_DIRECT	GO:0004866~endopeptidase inhibitor activity	1	1.06383	E1C4M6	78	1	277	3.55128	0.140794
GOTERM_MF_DIRECT	GO:0000976~transcription regulatory region sequence-specific DNA binding	1	1.06383	A0A1D5P8I3	78	1	277	3.55128	0.140794
GOTERM_MF_DIRECT	GO:0005314~high-affinity glutamate transmembrane transporter activity	1	1.06383	E1C7B5	78	1	277	3.55128	0.140794
GOTERM_MF_DIRECT	GO:0004332~fructose-bisphosphate aldolase activity	1	1.06383	R4GM10	78	1	277	3.55128	0.140794
GOTERM_MF_DIRECT	GO:0004601~peroxidase activity	1	1.06383	F1NBV0	78	1	277	3.55128	0.140794
GOTERM_MF_DIRECT	GO:0008026~ATP-dependent helicase activity	1	1.06383	F1NHI3	78	1	277	3.55128	0.140794
GOTERM_MF_DIRECT	GO:0019871~sodium channel inhibitor activity	1	1.06383	A0A1D5NZU2	78	1	277	3.55128	0.140794
GOTERM_MF_DIRECT	GO:0004315~3-oxoacyl-[acyl-carrier-protein] synthase activity	1	1.06383	A0A1D5P6Q5	78	1	277	3.55128	0.140794
GOTERM_MF_DIRECT	GO:0043047~single-stranded telomeric DNA binding	1	1.06383	Q5ZME1	78	1	277	3.55128	0.140794
GOTERM_MF_DIRECT	GO:0004312~fatty acid synthase activity	1	1.06383	A0A1D5P6Q5	78	1	277	3.55128	0.140794
GOTERM_MF_DIRECT	GO:0005093~Rab GDP-dissociation inhibitor activity	1	1.06383	F1NCZ2	78	1	277	3.55128	0.140794
GOTERM_MF_DIRECT	GO:0031994~insulin-like growth factor I binding	1	1.06383	P26007	78	1	277	3.55128	0.140794
GOTERM_MF_DIRECT	GO:0030371~translation repressor activity	1	1.06383	A0A1D5P359	78	1	277	3.55128	0.140794
GOTERM_MF_DIRECT	GO:0004111~creatine kinase activity	1	1.06383	F1NZ30	78	1	277	3.55128	0.140794
GOTERM_MF_DIRECT	GO:0004743~pyruvate kinase activity	1	1.06383	F1NW43	78	1	277	3.55128	0.140794
GOTERM_MF_DIRECT	GO:0004386~helicase activity	1	1.06383	Q5F491	78	1	277	3.55128	0.140794
GOTERM_MF_DIRECT	GO:0004656~procollagen-proline 4-dioxygenase activity	1	1.06383	P09102	78	1	277	3.55128	0.140794
GOTERM_MF_DIRECT	GO:0019905~syntaxin binding	1	1.06383	E1BRL4	78	1	277	3.55128	0.140794
GOTERM_MF_DIRECT	GO:0047451~3-hydroxyoctanoyl-[acyl-carrier-protein] dehydratase activity	1	1.06383	A0A1D5P6Q5	78	1	277	3.55128	0.140794
GOTERM_MF_DIRECT	GO:0030276~clathrin binding	1	1.06383	P62758	78	1	277	3.55128	0.140794
GOTERM_MF_DIRECT	GO:0051920~peroxiredoxin activity	1	1.06383	F1NBV0	78	1	277	3.55128	0.140794
GOTERM_MF_DIRECT	GO:0004421~hydroxymethylglutaryl-CoA synthase activity	1	1.06383	F1N9T0	78	1	277	3.55128	0.140794
GOTERM_MF_DIRECT	GO:0016296~palmitoyl-[acyl-carrier-protein] hydrolase activity	1	1.06383	A0A1D5P6Q5	78	1	277	3.55128	0.140794
GOTERM_MF_DIRECT	GO:0004313~[acyl-carrier-protein] S-acetyltransferase activity	1	1.06383	A0A1D5P6Q5	78	1	277	3.55128	0.140794
GOTERM_MF_DIRECT	GO:0005212~structural constituent of eye lens	1	1.06383	F1NJ08	78	1	277	3.55128	0.140794
GOTERM_MF_DIRECT	GO:0016595~glutamate binding	1	1.06383	E1C7B5	78	1	277	3.55128	0.140794
GOTERM_MF_DIRECT	GO:0038132~neuregulin binding	1	1.06383	P26007	78	1	277	3.55128	0.140794
GOTERM_MF_DIRECT	GO:0019843~rRNA binding	1	1.06383	A0A1D5NVI1	78	1	277	3.55128	0.140794
GOTERM_MF_DIRECT	GO:0004317~3-hydroxypalmitoyl-[acyl-carrier-protein] dehydratase activity	1	1.06383	A0A1D5P6Q5	78	1	277	3.55128	0.140794
GOTERM_MF_DIRECT	GO:0004365~glyceraldehyde-3-phosphate dehydrogenase (NAD+) (phosphorylating) activity	1	1.06383	F1NH87	78	1	277	3.55128	0.140794
GOTERM_MF_DIRECT	GO:0050839~cell adhesion molecule binding	1	1.06383	P28685	78	1	277	3.55128	0.140794
GOTERM_MF_DIRECT	GO:0004320~oleoyl-[acyl-carrier-protein] hydrolase activity	1	1.06383	A0A1D5P6Q5	78	1	277	3.55128	0.140794
GOTERM_MF_DIRECT	GO:0004407~histone deacetylase activity	1	1.06383	A0A1D5NW46	78	1	277	3.55128	0.140794
GOTERM_MF_DIRECT	GO:0004618~phosphoglycerate kinase activity	1	1.06383	F1NU17	78	1	277	3.55128	0.140794
GOTERM_MF_DIRECT	GO:0008199~ferric iron binding	1	1.06383	A0A1D5P4L7	78	1	277	3.55128	0.140794
GOTERM_MF_DIRECT	GO:0047801~L-cysteine:2-oxoglutarate aminotransferase activity	1	1.06383	P00504	78	1	277	3.55128	0.140794
GOTERM_MF_DIRECT	GO:0017150~tRNA dihydrouridine synthase activity	1	1.06383	A0A1D5P6Q5	78	1	277	3.55128	0.140794
GOTERM_MF_DIRECT	GO:0032041~NAD-dependent histone deacetylase activity (H3-K14 specific)	1	1.06383	A0A1D5NW46	78	1	277	3.55128	0.140794
GOTERM_MF_DIRECT	GO:0042623~ATPase activity, coupled	1	1.06383	A0A1D5PFJ6	78	1	277	3.55128	0.140794
GOTERM_MF_DIRECT	GO:0003697~single-stranded DNA binding	1	1.06383	A0A1D5P6Q5	78	1	277	3.55128	0.140794
GOTERM_MF_DIRECT	GO:0008308~voltage-gated anion channel activity	1	1.06383	A0A1L1RVM8	78	1	277	3.55128	0.140794
GOTERM_MF_DIRECT	GO:0005528~FK506 binding	1	1.06383	F1NIM4	78	1	277	3.55128	0.140794
GOTERM_MF_DIRECT	GO:0047179~platelet-activating factor acetyltransferase activity	1	1.06383	R4GL78	78	1	277	3.55128	0.140794
GOTERM_MF_DIRECT	GO:0102132~3-oxo-pimeloyl-[acp] methyl ester reductase activity	1	1.06383	A0A1D5P6Q5	78	1	277	3.55128	0.140794
GOTERM_MF_DIRECT	GO:0008184~glycogen phosphorylase activity	1	1.06383	E1BSN7	78	1	277	3.55128	0.140794
GOTERM_MF_DIRECT	GO:0016620~oxidoreductase activity, acting on the aldehyde or oxo group of donors, NAD or NADP as acceptor	1	1.06383	F1NH87	78	1	277	3.55128	0.140794
GOTERM_MF_DIRECT	GO:0003872~6-phosphofructokinase activity	1	1.06383	A0A1D5NYM1	78	1	277	3.55128	0.140794
GOTERM_MF_DIRECT	GO:0004576~oligosaccharyl transferase activity	1	1.06383	F1NNS1	78	1	277	3.55128	0.140794
GOTERM_MF_DIRECT	GO:0003847~1-alkyl-2-acetylglycerophosphocholine esterase activity	1	1.06383	R4GL78	78	1	277	3.55128	0.140794
GOTERM_MF_DIRECT	GO:0008143~poly(A) binding	1	1.06383	A0A1D5PJG4	78	1	277	3.55128	0.140794
GOTERM_MF_DIRECT	GO:0004634~phosphopyruvate hydratase activity	1	1.06383	A0A1L1RKH8	78	1	277	3.55128	0.140794
GOTERM_MF_DIRECT	GO:0031545~peptidyl-proline 4-dioxygenase activity	1	1.06383	P09102	78	1	277	3.55128	0.140794
GOTERM_MF_DIRECT	GO:0004867~serine-type endopeptidase inhibitor activity	1	1.06383	P01012	78	1	277	3.55128	0.140794
GOTERM_MF_DIRECT	GO:0016301~kinase activity	1	1.06383	F1NW43	78	1	277	3.55128	0.140794
GOTERM_MF_DIRECT	GO:0004316~3-oxoacyl-[acyl-carrier-protein] reductase (NADPH) activity	1	1.06383	A0A1D5P6Q5	78	1	277	3.55128	0.140794
GOTERM_MF_DIRECT	GO:0030955~potassium ion binding	1	1.06383	F1NW43	78	1	277	3.55128	0.140794
GOTERM_MF_DIRECT	GO:0016295~myristoyl-[acyl-carrier-protein] hydrolase activity	1	1.06383	A0A1D5P6Q5	78	1	277	3.55128	0.140794
GOTERM_MF_DIRECT	GO:0005086~ARF guanyl-nucleotide exchange factor activity	1	1.06383	F1N998	78	1	277	3.55128	0.140794
GOTERM_MF_DIRECT	GO:0004108~citrate (Si)-synthase activity	1	1.06383	A0A1D5PLS2	78	1	277	3.55128	0.140794
GOTERM_MF_DIRECT	GO:0002020~protease binding	1	1.06383	P01012	78	1	277	3.55128	0.140794
GOTERM_MF_DIRECT	GO:0030414~peptidase inhibitor activity	1	1.06383	P01012	78	1	277	3.55128	0.140794
GOTERM_MF_DIRECT	GO:0005525~GTP binding	8	8.51064	P84172, Q90965, Q90705, F1NIM4, F1N9H4, F1NN08, P09244, A0A1D5NW27	78	18	277	1.57835	0.141357
GOTERM_BP_DIRECT	GO:0034097~response to cytokine	1	1.06383	F1NNS1	80	1	279	3.4875	0.143369
GOTERM_BP_DIRECT	GO:0002842~positive regulation of T cell mediated immune response to tumor cell	1	1.06383	Q5ZL72	80	1	279	3.4875	0.143369
GOTERM_BP_DIRECT	GO:0032869~cellular response to insulin stimulus	1	1.06383	P00504	80	1	279	3.4875	0.143369
GOTERM_BP_DIRECT	GO:0051290~protein heterotetramerization	1	1.06383	P70081	80	1	279	3.4875	0.143369
GOTERM_BP_DIRECT	GO:0016239~positive regulation of macroautophagy	1	1.06383	R4GL78	80	1	279	3.4875	0.143369
GOTERM_BP_DIRECT	GO:0042407~cristae formation	1	1.06383	A0A1D5NXD7	80	1	279	3.4875	0.143369
GOTERM_BP_DIRECT	GO:0010870~positive regulation of receptor biosynthetic process	1	1.06383	A0A1D5NW46	80	1	279	3.4875	0.143369
GOTERM_BP_DIRECT	GO:0018401~peptidyl-proline hydroxylation to 4-hydroxy-L-proline	1	1.06383	P09102	80	1	279	3.4875	0.143369
GOTERM_BP_DIRECT	GO:0031629~synaptic vesicle fusion to presynaptic active zone membrane	1	1.06383	E1BRL4	80	1	279	3.4875	0.143369
GOTERM_BP_DIRECT	GO:0033206~meiotic cytokinesis	1	1.06383	Q90WD0	80	1	279	3.4875	0.143369
GOTERM_BP_DIRECT	GO:1902175~regulation of oxidative stress-induced intrinsic apoptotic signaling pathway	1	1.06383	P09102	80	1	279	3.4875	0.143369
GOTERM_BP_DIRECT	GO:0030041~actin filament polymerization	1	1.06383	C7G537	80	1	279	3.4875	0.143369
GOTERM_BP_DIRECT	GO:0042100~B cell proliferation	1	1.06383	Q5ZL72	80	1	279	3.4875	0.143369
GOTERM_BP_DIRECT	GO:0042384~cilium assembly	1	1.06383	F1N998	80	1	279	3.4875	0.143369
GOTERM_BP_DIRECT	GO:0007182~common-partner SMAD protein phosphorylation	1	1.06383	A0A1D5PJY1	80	1	279	3.4875	0.143369
GOTERM_BP_DIRECT	GO:0032100~positive regulation of appetite	1	1.06383	A0A1D5P6Q5	80	1	279	3.4875	0.143369
GOTERM_BP_DIRECT	GO:0048545~response to steroid hormone	1	1.06383	P01012	80	1	279	3.4875	0.143369
GOTERM_BP_DIRECT	GO:0006878~cellular copper ion homeostasis	1	1.06383	F1NN08	80	1	279	3.4875	0.143369
GOTERM_BP_DIRECT	GO:0060134~prepulse inhibition	1	1.06383	Q05423	80	1	279	3.4875	0.143369
GOTERM_BP_DIRECT	GO:0031647~regulation of protein stability	1	1.06383	A0A1D5PFJ6	80	1	279	3.4875	0.143369
GOTERM_BP_DIRECT	GO:0006344~maintenance of chromatin silencing	1	1.06383	A0A1D5NW46	80	1	279	3.4875	0.143369
GOTERM_BP_DIRECT	GO:0030043~actin filament fragmentation	1	1.06383	P21566	80	1	279	3.4875	0.143369
GOTERM_BP_DIRECT	GO:0021853~cerebral cortex GABAergic interneuron migration	1	1.06383	P28685	80	1	279	3.4875	0.143369
GOTERM_BP_DIRECT	GO:0045876~positive regulation of sister chromatid cohesion	1	1.06383	A0A1D5P8I3	80	1	279	3.4875	0.143369
GOTERM_BP_DIRECT	GO:0006114~glycerol biosynthetic process	1	1.06383	P00504	80	1	279	3.4875	0.143369
GOTERM_BP_DIRECT	GO:0033627~cell adhesion mediated by integrin	1	1.06383	P26007	80	1	279	3.4875	0.143369
GOTERM_BP_DIRECT	GO:0042754~negative regulation of circadian rhythm	1	1.06383	A0A1D5P8I3	80	1	279	3.4875	0.143369
GOTERM_BP_DIRECT	GO:0007160~cell-matrix adhesion	1	1.06383	P26007	80	1	279	3.4875	0.143369
GOTERM_BP_DIRECT	GO:2000650~negative regulation of sodium ion transmembrane transporter activity	1	1.06383	A0A1D5NZU2	80	1	279	3.4875	0.143369
GOTERM_BP_DIRECT	GO:0070307~lens fiber cell development	1	1.06383	F1NJ08	80	1	279	3.4875	0.143369
GOTERM_BP_DIRECT	GO:0006406~mRNA export from nucleus	1	1.06383	Q5ZME1	80	1	279	3.4875	0.143369
GOTERM_BP_DIRECT	GO:0051259~protein oligomerization	1	1.06383	A0A1D5NZU2	80	1	279	3.4875	0.143369
GOTERM_BP_DIRECT	GO:0022409~positive regulation of cell-cell adhesion	1	1.06383	P26007	80	1	279	3.4875	0.143369
GOTERM_BP_DIRECT	GO:1901897~regulation of relaxation of cardiac muscle	1	1.06383	A0A1D5NZU2	80	1	279	3.4875	0.143369
GOTERM_BP_DIRECT	GO:0016344~meiotic chromosome movement towards spindle pole	1	1.06383	Q90WD0	80	1	279	3.4875	0.143369
GOTERM_BP_DIRECT	GO:0072661~protein targeting to plasma membrane	1	1.06383	A0A1D5PJY1	80	1	279	3.4875	0.143369
GOTERM_BP_DIRECT	GO:2001237~negative regulation of extrinsic apoptotic signaling pathway	1	1.06383	P26007	80	1	279	3.4875	0.143369
GOTERM_BP_DIRECT	GO:0000060~protein import into nucleus, translocation	1	1.06383	F1NLL4	80	1	279	3.4875	0.143369
GOTERM_BP_DIRECT	GO:0030850~prostate gland development	1	1.06383	F1NIM4	80	1	279	3.4875	0.143369
GOTERM_BP_DIRECT	GO:0031668~cellular response to extracellular stimulus	1	1.06383	P26007	80	1	279	3.4875	0.143369
GOTERM_BP_DIRECT	GO:0043433~negative regulation of sequence-specific DNA binding transcription factor activity	1	1.06383	A0A1D5NW46	80	1	279	3.4875	0.143369
GOTERM_BP_DIRECT	GO:0048026~positive regulation of mRNA splicing, via spliceosome	1	1.06383	A0A1D5PFJ6	80	1	279	3.4875	0.143369
GOTERM_BP_DIRECT	GO:0035878~nail development	1	1.06383	P26007	80	1	279	3.4875	0.143369
GOTERM_BP_DIRECT	GO:0006085~acetyl-CoA biosynthetic process	1	1.06383	F1P269	80	1	279	3.4875	0.143369
GOTERM_BP_DIRECT	GO:0009611~response to wounding	1	1.06383	E1C7B5	80	1	279	3.4875	0.143369
GOTERM_BP_DIRECT	GO:0051693~actin filament capping	1	1.06383	F1NHT3	80	1	279	3.4875	0.143369
GOTERM_BP_DIRECT	GO:0060168~positive regulation of adenosine receptor signaling pathway	1	1.06383	P28685	80	1	279	3.4875	0.143369
GOTERM_BP_DIRECT	GO:0000740~nuclear membrane fusion	1	1.06383	F1NH87	80	1	279	3.4875	0.143369
GOTERM_BP_DIRECT	GO:0002553~histamine secretion by mast cell	1	1.06383	E1BRL4	80	1	279	3.4875	0.143369
GOTERM_BP_DIRECT	GO:0000380~alternative mRNA splicing, via spliceosome	1	1.06383	A0A1D5P8I3	80	1	279	3.4875	0.143369
GOTERM_BP_DIRECT	GO:0009449~gamma-aminobutyric acid biosynthetic process	1	1.06383	E1C7B5	80	1	279	3.4875	0.143369
GOTERM_BP_DIRECT	GO:0048565~digestive tract development	1	1.06383	P26007	80	1	279	3.4875	0.143369
GOTERM_BP_DIRECT	GO:0000724~double-strand break repair via homologous recombination	1	1.06383	A0A1D5P8I3	80	1	279	3.4875	0.143369
GOTERM_BP_DIRECT	GO:0072318~clathrin coat disassembly	1	1.06383	A0A1D5PFJ6	80	1	279	3.4875	0.143369
GOTERM_BP_DIRECT	GO:0045727~positive regulation of translation	1	1.06383	Q90705	80	1	279	3.4875	0.143369
GOTERM_BP_DIRECT	GO:0015908~fatty acid transport	1	1.06383	P00508	80	1	279	3.4875	0.143369
GOTERM_BP_DIRECT	GO:0060395~SMAD protein signal transduction	1	1.06383	F1NJ08	80	1	279	3.4875	0.143369
GOTERM_BP_DIRECT	GO:0030490~maturation of SSU-rRNA	1	1.06383	F1NTT2	80	1	279	3.4875	0.143369
GOTERM_BP_DIRECT	GO:0035606~peptidyl-cysteine S-trans-nitrosylation	1	1.06383	F1NH87	80	1	279	3.4875	0.143369
GOTERM_BP_DIRECT	GO:0048025~negative regulation of mRNA splicing, via spliceosome	1	1.06383	Q5ZME1	80	1	279	3.4875	0.143369
GOTERM_BP_DIRECT	GO:0009792~embryo development ending in birth or egg hatching	1	1.06383	P01012	80	1	279	3.4875	0.143369
GOTERM_BP_DIRECT	GO:0042327~positive regulation of phosphorylation	1	1.06383	P26007	80	1	279	3.4875	0.143369
GOTERM_BP_DIRECT	GO:0097090~presynaptic membrane organization	1	1.06383	P28685	80	1	279	3.4875	0.143369
GOTERM_BP_DIRECT	GO:0006900~membrane budding	1	1.06383	F1N998	80	1	279	3.4875	0.143369
GOTERM_BP_DIRECT	GO:0050900~leukocyte migration	1	1.06383	P26007	80	1	279	3.4875	0.143369
GOTERM_BP_DIRECT	GO:0006826~iron ion transport	1	1.06383	A0A1D5P4L7	80	1	279	3.4875	0.143369
GOTERM_BP_DIRECT	GO:0043032~positive regulation of macrophage activation	1	1.06383	Q5ZL72	80	1	279	3.4875	0.143369
GOTERM_BP_DIRECT	GO:0055072~iron ion homeostasis	1	1.06383	A0A1D5P4L7	80	1	279	3.4875	0.143369
GOTERM_BP_DIRECT	GO:0019730~antimicrobial humoral response	1	1.06383	A0A1D5P4L7	80	1	279	3.4875	0.143369
GOTERM_BP_DIRECT	GO:0046847~filopodium assembly	1	1.06383	P26007	80	1	279	3.4875	0.143369
GOTERM_BP_DIRECT	GO:0002244~hematopoietic progenitor cell differentiation	1	1.06383	Q90705	80	1	279	3.4875	0.143369
GOTERM_BP_DIRECT	GO:0002479~antigen processing and presentation of exogenous peptide antigen via MHC class I, TAP-dependent	1	1.06383	P01012	80	1	279	3.4875	0.143369
GOTERM_BP_DIRECT	GO:0002480~antigen processing and presentation of exogenous peptide antigen via MHC class I, TAP-independent	1	1.06383	P01012	80	1	279	3.4875	0.143369
GOTERM_BP_DIRECT	GO:0030521~androgen receptor signaling pathway	1	1.06383	F1NIM4	80	1	279	3.4875	0.143369
GOTERM_BP_DIRECT	GO:0010951~negative regulation of endopeptidase activity	1	1.06383	P01012	80	1	279	3.4875	0.143369
GOTERM_BP_DIRECT	GO:0018107~peptidyl-threonine phosphorylation	1	1.06383	A0A1D5NZU2	80	1	279	3.4875	0.143369
GOTERM_BP_DIRECT	GO:0006123~mitochondrial electron transport, cytochrome c to oxygen	1	1.06383	Q5ZJV5	80	1	279	3.4875	0.143369
GOTERM_BP_DIRECT	GO:0032088~negative regulation of NF-kappaB transcription factor activity	1	1.06383	A0A1D5PPD3	80	1	279	3.4875	0.143369
GOTERM_BP_DIRECT	GO:0045665~negative regulation of neuron differentiation	1	1.06383	P28685	80	1	279	3.4875	0.143369
GOTERM_BP_DIRECT	GO:1900042~positive regulation of interleukin-2 secretion	1	1.06383	A0A1D5PJY1	80	1	279	3.4875	0.143369
GOTERM_BP_DIRECT	GO:0006002~fructose 6-phosphate metabolic process	1	1.06383	A0A1D5NYM1	80	1	279	3.4875	0.143369
GOTERM_BP_DIRECT	GO:0021954~central nervous system neuron development	1	1.06383	E1C6D1	80	1	279	3.4875	0.143369
GOTERM_BP_DIRECT	GO:0032729~positive regulation of interferon-gamma production	1	1.06383	Q5ZL72	80	1	279	3.4875	0.143369
GOTERM_BP_DIRECT	GO:0050873~brown fat cell differentiation	1	1.06383	P26007	80	1	279	3.4875	0.143369
GOTERM_BP_DIRECT	GO:0050801~ion homeostasis	1	1.06383	P01012	80	1	279	3.4875	0.143369
GOTERM_BP_DIRECT	GO:0071205~protein localization to juxtaparanode region of axon	1	1.06383	P28685	80	1	279	3.4875	0.143369
GOTERM_BP_DIRECT	GO:0080144~amino acid homeostasis	1	1.06383	P01012	80	1	279	3.4875	0.143369
GOTERM_BP_DIRECT	GO:0006089~lactate metabolic process	1	1.06383	A0A1D5P6Q5	80	1	279	3.4875	0.143369
GOTERM_BP_DIRECT	GO:0006734~NADH metabolic process	1	1.06383	Q5ZME2	80	1	279	3.4875	0.143369
GOTERM_BP_DIRECT	GO:0034394~protein localization to cell surface	1	1.06383	Q5ZKK4	80	1	279	3.4875	0.143369
GOTERM_BP_DIRECT	GO:0010977~negative regulation of neuron projection development	1	1.06383	F1NJ08	80	1	279	3.4875	0.143369
GOTERM_BP_DIRECT	GO:0055089~fatty acid homeostasis	1	1.06383	P00504	80	1	279	3.4875	0.143369
GOTERM_BP_DIRECT	GO:0003407~neural retina development	1	1.06383	Q05423	80	1	279	3.4875	0.143369
GOTERM_BP_DIRECT	GO:0005980~glycogen catabolic process	1	1.06383	E1BSN7	80	1	279	3.4875	0.143369
GOTERM_BP_DIRECT	GO:0030388~fructose 1,6-bisphosphate metabolic process	1	1.06383	R4GM10	80	1	279	3.4875	0.143369
GOTERM_BP_DIRECT	GO:0006892~post-Golgi vesicle-mediated transport	1	1.06383	A0A1D5PFJ6	80	1	279	3.4875	0.143369
GOTERM_BP_DIRECT	GO:0009416~response to light stimulus	1	1.06383	E1C7B5	80	1	279	3.4875	0.143369
GOTERM_BP_DIRECT	GO:0061024~membrane organization	1	1.06383	A0A1D5PFJ6	80	1	279	3.4875	0.143369
GOTERM_BP_DIRECT	GO:0007158~neuron cell-cell adhesion	1	1.06383	P28685	80	1	279	3.4875	0.143369
GOTERM_BP_DIRECT	GO:0019722~calcium-mediated signaling	1	1.06383	P62758	80	1	279	3.4875	0.143369
GOTERM_BP_DIRECT	GO:0051086~chaperone mediated protein folding independent of cofactor	1	1.06383	A0A1D5NUC1	80	1	279	3.4875	0.143369
GOTERM_BP_DIRECT	GO:0051131~chaperone-mediated protein complex assembly	1	1.06383	A0A1D5NUC1	80	1	279	3.4875	0.143369
GOTERM_BP_DIRECT	GO:1990428~miRNA transport	1	1.06383	Q5ZME1	80	1	279	3.4875	0.143369
GOTERM_BP_DIRECT	GO:0022010~central nervous system myelination	1	1.06383	P28685	80	1	279	3.4875	0.143369
GOTERM_BP_DIRECT	GO:0070779~D-aspartate import	1	1.06383	E1C7B5	80	1	279	3.4875	0.143369
GOTERM_BP_DIRECT	GO:0051938~L-glutamate import	1	1.06383	E1C7B5	80	1	279	3.4875	0.143369
GOTERM_BP_DIRECT	GO:0097052~L-kynurenine metabolic process	1	1.06383	P00508	80	1	279	3.4875	0.143369
GOTERM_BP_DIRECT	GO:0097320~membrane tubulation	1	1.06383	F1N998	80	1	279	3.4875	0.143369
GOTERM_BP_DIRECT	GO:0007268~chemical synaptic transmission	1	1.06383	E1C4M6	80	1	279	3.4875	0.143369
GOTERM_BP_DIRECT	GO:0045862~positive regulation of proteolysis	1	1.06383	A0A1D5NW46	80	1	279	3.4875	0.143369
GOTERM_BP_DIRECT	GO:0021846~cell proliferation in forebrain	1	1.06383	Q05423	80	1	279	3.4875	0.143369
GOTERM_BP_DIRECT	GO:0043001~Golgi to plasma membrane protein transport	1	1.06383	A0A1D5PJY1	80	1	279	3.4875	0.143369
GOTERM_BP_DIRECT	GO:0006378~mRNA polyadenylation	1	1.06383	A0A1D5P9A5	80	1	279	3.4875	0.143369
GOTERM_BP_DIRECT	GO:0048168~regulation of neuronal synaptic plasticity	1	1.06383	P28685	80	1	279	3.4875	0.143369
GOTERM_BP_DIRECT	GO:0008356~asymmetric cell division	1	1.06383	Q90WD0	80	1	279	3.4875	0.143369
GOTERM_BP_DIRECT	GO:0002755~MyD88-dependent toll-like receptor signaling pathway	1	1.06383	Q5ZL72	80	1	279	3.4875	0.143369
GOTERM_BP_DIRECT	GO:0071206~establishment of protein localization to juxtaparanode region of axon	1	1.06383	P28685	80	1	279	3.4875	0.143369
GOTERM_BP_DIRECT	GO:1903078~positive regulation of protein localization to plasma membrane	1	1.06383	A0A1D5PJY1	80	1	279	3.4875	0.143369
GOTERM_BP_DIRECT	GO:0015866~ADP transport	1	1.06383	A0A1L1RVM8	80	1	279	3.4875	0.143369
GOTERM_BP_DIRECT	GO:0050870~positive regulation of T cell activation	1	1.06383	Q5ZL72	80	1	279	3.4875	0.143369
GOTERM_BP_DIRECT	GO:0014002~astrocyte development	1	1.06383	F1NJ08	80	1	279	3.4875	0.143369
GOTERM_BP_DIRECT	GO:0045163~clustering of voltage-gated potassium channels	1	1.06383	P28685	80	1	279	3.4875	0.143369
GOTERM_BP_DIRECT	GO:0051412~response to corticosterone	1	1.06383	P01012	80	1	279	3.4875	0.143369
GOTERM_BP_DIRECT	GO:0016082~synaptic vesicle priming	1	1.06383	E1BRL4	80	1	279	3.4875	0.143369
GOTERM_BP_DIRECT	GO:0032272~negative regulation of protein polymerization	1	1.06383	A0A1L1RVM8	80	1	279	3.4875	0.143369
GOTERM_BP_DIRECT	GO:0043627~response to estrogen	1	1.06383	P01012	80	1	279	3.4875	0.143369
GOTERM_BP_DIRECT	GO:0003073~regulation of systemic arterial blood pressure	1	1.06383	P62758	80	1	279	3.4875	0.143369
GOTERM_BP_DIRECT	GO:0061738~late endosomal microautophagy	1	1.06383	A0A1D5PFJ6	80	1	279	3.4875	0.143369
GOTERM_BP_DIRECT	GO:0009058~biosynthetic process	1	1.06383	A0A1D5P6Q5	80	1	279	3.4875	0.143369
GOTERM_BP_DIRECT	GO:0016337~single organismal cell-cell adhesion	1	1.06383	F1NSL7	80	1	279	3.4875	0.143369
GOTERM_BP_DIRECT	GO:1903070~negative regulation of ER-associated ubiquitin-dependent protein catabolic process	1	1.06383	E1C4M6	80	1	279	3.4875	0.143369
GOTERM_BP_DIRECT	GO:0006880~intracellular sequestering of iron ion	1	1.06383	A0A1D5P4L7	80	1	279	3.4875	0.143369
GOTERM_BP_DIRECT	GO:0051402~neuron apoptotic process	1	1.06383	F1NH87	80	1	279	3.4875	0.143369
GOTERM_BP_DIRECT	GO:1902904~negative regulation of fibril organization	1	1.06383	A0A1D5PFJ6	80	1	279	3.4875	0.143369
GOTERM_BP_DIRECT	GO:0032755~positive regulation of interleukin-6 production	1	1.06383	Q5ZL72	80	1	279	3.4875	0.143369
GOTERM_BP_DIRECT	GO:0048291~isotype switching to IgG isotypes	1	1.06383	Q5ZL72	80	1	279	3.4875	0.143369
GOTERM_BP_DIRECT	GO:0060271~cilium morphogenesis	1	1.06383	Q90WD0	80	1	279	3.4875	0.143369
GOTERM_BP_DIRECT	GO:0031053~primary miRNA processing	1	1.06383	Q5ZME1	80	1	279	3.4875	0.143369
GOTERM_BP_DIRECT	GO:0050832~defense response to fungus	1	1.06383	C7G537	80	1	279	3.4875	0.143369
GOTERM_BP_DIRECT	GO:0060020~Bergmann glial cell differentiation	1	1.06383	F1NJ08	80	1	279	3.4875	0.143369
GOTERM_BP_DIRECT	GO:0071456~cellular response to hypoxia	1	1.06383	P09102	80	1	279	3.4875	0.143369
GOTERM_BP_DIRECT	GO:0050920~regulation of chemotaxis	1	1.06383	E1C4M6	80	1	279	3.4875	0.143369
GOTERM_BP_DIRECT	GO:0072001~renal system development	1	1.06383	P26007	80	1	279	3.4875	0.143369
GOTERM_BP_DIRECT	GO:0006463~steroid hormone receptor complex assembly	1	1.06383	F1NIM4	80	1	279	3.4875	0.143369
GOTERM_BP_DIRECT	GO:0031133~regulation of axon diameter	1	1.06383	P28685	80	1	279	3.4875	0.143369
GOTERM_BP_DIRECT	GO:0006352~DNA-templated transcription, initiation	1	1.06383	P70081	80	1	279	3.4875	0.143369
GOTERM_BP_DIRECT	GO:0030516~regulation of axon extension	1	1.06383	Q71SG2	80	1	279	3.4875	0.143369
GOTERM_BP_DIRECT	GO:0048667~cell morphogenesis involved in neuron differentiation	1	1.06383	E1C7B5	80	1	279	3.4875	0.143369
GOTERM_BP_DIRECT	GO:0051276~chromosome organization	1	1.06383	A0A1D5P8I3	80	1	279	3.4875	0.143369
GOTERM_BP_DIRECT	GO:0046661~male sex differentiation	1	1.06383	F1NIM4	80	1	279	3.4875	0.143369
GOTERM_BP_DIRECT	GO:0060341~regulation of cellular localization	1	1.06383	A0A1D5NZU2	80	1	279	3.4875	0.143369
GOTERM_BP_DIRECT	GO:0030866~cortical actin cytoskeleton organization	1	1.06383	A0A1D5PAX1	80	1	279	3.4875	0.143369
GOTERM_BP_DIRECT	GO:0019511~peptidyl-proline hydroxylation	1	1.06383	P09102	80	1	279	3.4875	0.143369
GOTERM_BP_DIRECT	GO:0006325~chromatin organization	1	1.06383	A0A1D5NW46	80	1	279	3.4875	0.143369
GOTERM_BP_DIRECT	GO:0030163~protein catabolic process	1	1.06383	Q05744	80	1	279	3.4875	0.143369
GOTERM_BP_DIRECT	GO:0010324~membrane invagination	1	1.06383	F1N998	80	1	279	3.4875	0.143369
GOTERM_BP_DIRECT	GO:0008219~cell death	1	1.06383	Q05744	80	1	279	3.4875	0.143369
GOTERM_BP_DIRECT	GO:0070125~mitochondrial translational elongation	1	1.06383	P84172	80	1	279	3.4875	0.143369
GOTERM_BP_DIRECT	GO:0070934~CRD-mediated mRNA stabilization	1	1.06383	A0A1D5PJG4	80	1	279	3.4875	0.143369
GOTERM_BP_DIRECT	GO:0021545~cranial nerve development	1	1.06383	E1C7B5	80	1	279	3.4875	0.143369
GOTERM_BP_DIRECT	GO:0003254~regulation of membrane depolarization	1	1.06383	A0A1D5NZU2	80	1	279	3.4875	0.143369
GOTERM_BP_DIRECT	GO:0000082~G1/S transition of mitotic cell cycle	1	1.06383	A0A1D5NZU2	80	1	279	3.4875	0.143369
GOTERM_BP_DIRECT	GO:0007219~Notch signaling pathway	1	1.06383	P00504	80	1	279	3.4875	0.143369
GOTERM_BP_DIRECT	GO:0002368~B cell cytokine production	1	1.06383	Q5ZL72	80	1	279	3.4875	0.143369
GOTERM_BP_DIRECT	GO:0071709~membrane assembly	1	1.06383	A0A1D5PJY1	80	1	279	3.4875	0.143369
GOTERM_BP_DIRECT	GO:0045653~negative regulation of megakaryocyte differentiation	1	1.06383	P70081	80	1	279	3.4875	0.143369
GOTERM_BP_DIRECT	GO:0050806~positive regulation of synaptic transmission	1	1.06383	E1C7B5	80	1	279	3.4875	0.143369
GOTERM_BP_DIRECT	GO:0051090~regulation of sequence-specific DNA binding transcription factor activity	1	1.06383	A0A1D5PPD3	80	1	279	3.4875	0.143369
GOTERM_BP_DIRECT	GO:0006537~glutamate biosynthetic process	1	1.06383	E1C7B5	80	1	279	3.4875	0.143369
GOTERM_BP_DIRECT	GO:0006881~extracellular sequestering of iron ion	1	1.06383	A0A1D5P4L7	80	1	279	3.4875	0.143369
GOTERM_BP_DIRECT	GO:0051653~spindle localization	1	1.06383	Q90WD0	80	1	279	3.4875	0.143369
GOTERM_BP_DIRECT	GO:0030050~vesicle transport along actin filament	1	1.06383	F1N998	80	1	279	3.4875	0.143369
GOTERM_BP_DIRECT	GO:0010668~ectodermal cell differentiation	1	1.06383	P26007	80	1	279	3.4875	0.143369
GOTERM_BP_DIRECT	GO:0031503~protein complex localization	1	1.06383	F1NIM4	80	1	279	3.4875	0.143369
GOTERM_BP_DIRECT	GO:0006006~glucose metabolic process	1	1.06383	F1NH87	80	1	279	3.4875	0.143369
GOTERM_BP_DIRECT	GO:0048710~regulation of astrocyte differentiation	1	1.06383	P28685	80	1	279	3.4875	0.143369
GOTERM_BP_DIRECT	GO:0006953~acute-phase response	1	1.06383	A0A1D5P4L7	80	1	279	3.4875	0.143369
GOTERM_BP_DIRECT	GO:0090218~positive regulation of lipid kinase activity	1	1.06383	F1N9H4	80	1	279	3.4875	0.143369
GOTERM_BP_DIRECT	GO:0006816~calcium ion transport	1	1.06383	A0A1D5NZU2	80	1	279	3.4875	0.143369
GOTERM_BP_DIRECT	GO:0007184~SMAD protein import into nucleus	1	1.06383	A0A1D5PJY1	80	1	279	3.4875	0.143369
GOTERM_BP_DIRECT	GO:0031223~auditory behavior	1	1.06383	E1C7B5	80	1	279	3.4875	0.143369
GOTERM_BP_DIRECT	GO:0022008~neurogenesis	1	1.06383	Q05423	80	1	279	3.4875	0.143369
GOTERM_BP_DIRECT	GO:0006283~transcription-coupled nucleotide-excision repair	1	1.06383	A0A1D5PPD3	80	1	279	3.4875	0.143369
GOTERM_BP_DIRECT	GO:0006611~protein export from nucleus	1	1.06383	F1NLL4	80	1	279	3.4875	0.143369
GOTERM_BP_DIRECT	GO:0006914~autophagy	1	1.06383	Q05744	80	1	279	3.4875	0.143369
GOTERM_BP_DIRECT	GO:0046598~positive regulation of viral entry into host cell	1	1.06383	P09102	80	1	279	3.4875	0.143369
GOTERM_BP_DIRECT	GO:0098869~cellular oxidant detoxification	1	1.06383	F1NBV0	80	1	279	3.4875	0.143369
GOTERM_BP_DIRECT	GO:0010954~positive regulation of protein processing	1	1.06383	P28685	80	1	279	3.4875	0.143369
GOTERM_BP_DIRECT	GO:0007417~central nervous system development	1	1.06383	P28685	80	1	279	3.4875	0.143369
GOTERM_BP_DIRECT	GO:0010216~maintenance of DNA methylation	1	1.06383	A0A1D5PPD3	80	1	279	3.4875	0.143369
GOTERM_BP_DIRECT	GO:0051014~actin filament severing	1	1.06383	Z4YJB8	80	1	279	3.4875	0.143369
GOTERM_CC_DIRECT	GO:0030056~hemidesmosome	1	1.06383	P26007	84	1	290	3.45238	0.144828
GOTERM_CC_DIRECT	GO:0000015~phosphopyruvate hydratase complex	1	1.06383	A0A1L1RKH8	84	1	290	3.45238	0.144828
GOTERM_CC_DIRECT	GO:0005741~mitochondrial outer membrane	1	1.06383	A0A1L1RVM8	84	1	290	3.45238	0.144828
GOTERM_CC_DIRECT	GO:0014704~intercalated disc	1	1.06383	A0A1D5NZU2	84	1	290	3.45238	0.144828
GOTERM_CC_DIRECT	GO:0031090~organelle membrane	1	1.06383	A0A1L1RVM8	84	1	290	3.45238	0.144828
GOTERM_CC_DIRECT	GO:0005689~U12-type spliceosomal complex	1	1.06383	F1NHI3	84	1	290	3.45238	0.144828
GOTERM_CC_DIRECT	GO:0010494~cytoplasmic stress granule	1	1.06383	A0A1D5P359	84	1	290	3.45238	0.144828
GOTERM_CC_DIRECT	GO:0036195~muscle cell projection membrane	1	1.06383	Q5ZJI7	84	1	290	3.45238	0.144828
GOTERM_CC_DIRECT	GO:0098793~presynapse	1	1.06383	E1BRL4	84	1	290	3.45238	0.144828
GOTERM_CC_DIRECT	GO:0005905~clathrin-coated pit	1	1.06383	Q5ZL72	84	1	290	3.45238	0.144828
GOTERM_CC_DIRECT	GO:0045335~phagocytic vesicle	1	1.06383	P01012	84	1	290	3.45238	0.144828
GOTERM_CC_DIRECT	GO:0043034~costamere	1	1.06383	F1NHT3	84	1	290	3.45238	0.144828
GOTERM_CC_DIRECT	GO:0031905~early endosome lumen	1	1.06383	P01012	84	1	290	3.45238	0.144828
GOTERM_CC_DIRECT	GO:0009925~basal plasma membrane	1	1.06383	P26007	84	1	290	3.45238	0.144828
GOTERM_CC_DIRECT	GO:0030135~coated vesicle	1	1.06383	Q5ZL72	84	1	290	3.45238	0.144828
GOTERM_CC_DIRECT	GO:0031674~I band	1	1.06383	P21566	84	1	290	3.45238	0.144828
GOTERM_CC_DIRECT	GO:0008305~integrin complex	1	1.06383	P26007	84	1	290	3.45238	0.144828
GOTERM_CC_DIRECT	GO:0009346~citrate lyase complex	1	1.06383	F1P269	84	1	290	3.45238	0.144828
GOTERM_CC_DIRECT	GO:0031594~neuromuscular junction	1	1.06383	A0A1D5NZU2	84	1	290	3.45238	0.144828
GOTERM_CC_DIRECT	GO:0016604~nuclear body	1	1.06383	A0A1D5PPD3	84	1	290	3.45238	0.144828
GOTERM_CC_DIRECT	GO:0005694~chromosome	1	1.06383	F1NU17	84	1	290	3.45238	0.144828
GOTERM_CC_DIRECT	GO:0032437~cuticular plate	1	1.06383	A0A1D5PJY1	84	1	290	3.45238	0.144828
GOTERM_CC_DIRECT	GO:0046696~lipopolysaccharide receptor complex	1	1.06383	Q5ZL72	84	1	290	3.45238	0.144828
GOTERM_CC_DIRECT	GO:0044224~juxtaparanode region of axon	1	1.06383	P28685	84	1	290	3.45238	0.144828
GOTERM_CC_DIRECT	GO:0042629~mast cell granule	1	1.06383	E1BRL4	84	1	290	3.45238	0.144828
GOTERM_CC_DIRECT	GO:0043194~axon initial segment	1	1.06383	A0A1D5NZU2	84	1	290	3.45238	0.144828
GOTERM_CC_DIRECT	GO:0000974~Prp19 complex	1	1.06383	A0A1D5PFJ6	84	1	290	3.45238	0.144828
GOTERM_CC_DIRECT	GO:0030315~T-tubule	1	1.06383	A0A1D5NZU2	84	1	290	3.45238	0.144828
GOTERM_CC_DIRECT	GO:0032010~phagolysosome	1	1.06383	P01012	84	1	290	3.45238	0.144828
GOTERM_CC_DIRECT	GO:0033116~endoplasmic reticulum-Golgi intermediate compartment membrane	1	1.06383	Q90965	84	1	290	3.45238	0.144828
GOTERM_CC_DIRECT	GO:0000151~ubiquitin ligase complex	1	1.06383	A0A1D5PFJ6	84	1	290	3.45238	0.144828
GOTERM_CC_DIRECT	GO:0030673~axolemma	1	1.06383	A0A1D5PJY1	84	1	290	3.45238	0.144828
GOTERM_CC_DIRECT	GO:0090575~RNA polymerase II transcription factor complex	1	1.06383	A0A1D5P8I3	84	1	290	3.45238	0.144828
GOTERM_CC_DIRECT	GO:0016235~aggresome	1	1.06383	Q90705	84	1	290	3.45238	0.144828
GOTERM_CC_DIRECT	GO:0016222~procollagen-proline 4-dioxygenase complex	1	1.06383	P09102	84	1	290	3.45238	0.144828
GOTERM_CC_DIRECT	GO:0005770~late endosome	1	1.06383	A0A1D5PFJ6	84	1	290	3.45238	0.144828
GOTERM_CC_DIRECT	GO:0045177~apical part of cell	1	1.06383	E1BSN7	84	1	290	3.45238	0.144828
GOTERM_CC_DIRECT	GO:0031430~M band	1	1.06383	A0A1D5PJY1	84	1	290	3.45238	0.144828
GOTERM_CC_DIRECT	GO:0070937~CRD-mediated mRNA stability complex	1	1.06383	A0A1D5PJG4	84	1	290	3.45238	0.144828
GOTERM_CC_DIRECT	GO:0034663~endoplasmic reticulum chaperone complex	1	1.06383	P09102	84	1	290	3.45238	0.144828
GOTERM_CC_DIRECT	GO:0005849~mRNA cleavage factor complex	1	1.06383	A0A1D5P9A5	84	1	290	3.45238	0.144828
GOTERM_CC_DIRECT	GO:0071008~U2-type post-mRNA release spliceosomal complex	1	1.06383	F1NHI3	84	1	290	3.45238	0.144828
GOTERM_CC_DIRECT	GO:0005929~cilium	1	1.06383	F1NW43	84	1	290	3.45238	0.144828
GOTERM_CC_DIRECT	GO:0005882~intermediate filament	1	1.06383	F1NJ08	84	1	290	3.45238	0.144828
GOTERM_CC_DIRECT	GO:0000118~histone deacetylase complex	1	1.06383	A0A1D5NW46	84	1	290	3.45238	0.144828
GOTERM_CC_DIRECT	GO:0097433~dense body	1	1.06383	P53478	84	1	290	3.45238	0.144828
GOTERM_CC_DIRECT	GO:0019907~cyclin-dependent protein kinase activating kinase holoenzyme complex	1	1.06383	Q5ZL72	84	1	290	3.45238	0.144828
GOTERM_CC_DIRECT	GO:0042581~specific granule	1	1.06383	E1BRL4	84	1	290	3.45238	0.144828
GOTERM_CC_DIRECT	GO:0016580~Sin3 complex	1	1.06383	A0A1D5NW46	84	1	290	3.45238	0.144828
GOTERM_CC_DIRECT	GO:0042582~azurophil granule	1	1.06383	E1BRL4	84	1	290	3.45238	0.144828
GOTERM_CC_DIRECT	GO:0044295~axonal growth cone	1	1.06383	Q03696	84	1	290	3.45238	0.144828
GOTERM_CC_DIRECT	GO:0031988~membrane-bounded vesicle	1	1.06383	P01012	84	1	290	3.45238	0.144828
GOTERM_CC_DIRECT	GO:0008091~spectrin	1	1.06383	A0A1D5PJY1	84	1	290	3.45238	0.144828
GOTERM_CC_DIRECT	GO:0042587~glycogen granule	1	1.06383	A0A1D5P6Q5	84	1	290	3.45238	0.144828
GOTERM_CC_DIRECT	GO:0061617~MICOS complex	1	1.06383	A0A1D5NXD7	84	1	290	3.45238	0.144828
GOTERM_CC_DIRECT	GO:0016529~sarcoplasmic reticulum	1	1.06383	A0A1D5NZU2	84	1	290	3.45238	0.144828
GOTERM_CC_DIRECT	GO:0031201~SNARE complex	1	1.06383	E1BRL4	84	1	290	3.45238	0.144828
GOTERM_CC_DIRECT	GO:0033268~node of Ranvier	1	1.06383	P28685	84	1	290	3.45238	0.144828
GOTERM_CC_DIRECT	GO:0043205~fibril	1	1.06383	E1C7B5	84	1	290	3.45238	0.144828
GOTERM_MF_DIRECT	GO:0003924~GTPase activity	6	6.38298	P84172, Q90965, Q90705, F1N9H4, P09244, A0A1D5NW27	78	13	277	1.63905	0.160697
GOTERM_MF_DIRECT	GO:0051015~actin filament binding	4	4.25532	Q90WD0, Z4YJB8, P21566, Q5ZJI7	78	8	277	1.77564	0.16879
GOTERM_CC_DIRECT	GO:0031012~extracellular matrix	4	4.25532	F1NW43, Q5ZL72, F1NH87, A0A1D5P4L7	84	8	290	1.72619	0.172605
GOTERM_MF_DIRECT	GO:0044822~poly(A) RNA binding	22	23.4043	A0A1D5PFJ6, P70081, A0A1D5PJG4, F1NTT2, F1NHI3, Q90705, F1NIM4, A0A1D5P954, A0A1D5NW46, A0A1D5P6Q5, A0A1L1RKH8, A0A1D5PJY1, F1NCZ2, E1BZS2, P00508, A0A1D5P8I3, Q9I8D6, P09102, F1NN08, F1NU56, F1NW43, Q5ZL72	78	64	277	1.22075	0.181196
GOTERM_MF_DIRECT	GO:0008134~transcription factor binding	2	2.12766	Q05423, A0A1D5NW46	78	4	277	1.77564	0.192256
GOTERM_MF_DIRECT	GO:0004004~ATP-dependent RNA helicase activity	2	2.12766	F1NHI3, Q5F491	78	4	277	1.77564	0.192256
GOTERM_BP_DIRECT	GO:0042493~response to drug	2	2.12766	E1C7B5, A0A1D5P4L7	80	4	279	1.74375	0.19856
GOTERM_BP_DIRECT	GO:0016579~protein deubiquitination	2	2.12766	E1C4M6, A0A1D5PPD3	80	4	279	1.74375	0.19856
GOTERM_BP_DIRECT	GO:0051973~positive regulation of telomerase activity	2	2.12766	Q9I8D6, A0A1D5NUC1	80	4	279	1.74375	0.19856
GOTERM_BP_DIRECT	GO:0006414~translational elongation	2	2.12766	P84172, Q90705	80	4	279	1.74375	0.19856
GOTERM_BP_DIRECT	GO:0045892~negative regulation of transcription, DNA-templated	2	2.12766	A0A1D5PFJ6, A0A1L1RKH8	80	4	279	1.74375	0.19856
GOTERM_BP_DIRECT	GO:0030836~positive regulation of actin filament depolymerization	2	2.12766	Z4YJB8, P21566	80	4	279	1.74375	0.19856
GOTERM_BP_DIRECT	GO:0048813~dendrite morphogenesis	2	2.12766	F1NLH0, E1C6D1	80	4	279	1.74375	0.19856
GOTERM_BP_DIRECT	GO:0043065~positive regulation of apoptotic process	2	2.12766	F1N9H4, P26007	80	4	279	1.74375	0.19856
GOTERM_BP_DIRECT	GO:0008284~positive regulation of cell proliferation	2	2.12766	A0A1D5NW46, Q5ZKS0	80	4	279	1.74375	0.19856
GOTERM_CC_DIRECT	GO:0016020~membrane	14	14.8936	A0A1D5PFJ6, P70081, Q71SG2, A0A1D5PJG4, Q90WD0, A0A1L1RKH8, F1NH87, Q5ZME1, A0A1D5NYM1, A0A1D5NVI1, F1NBV0, E1BZS2, E1BSN7, A0A1D5P9A5	84	38	290	1.27193	0.216506
GOTERM_CC_DIRECT	GO:0005622~intracellular	7	7.44681	F1NCZ2, Q90705, F1N9H4, F1NN08, P62758, C7G537, F1NLL4	84	17	290	1.42157	0.22047
GOTERM_CC_DIRECT	GO:0005829~cytosol	17	18.0851	A0A1D5PFJ6, Q71SG2, F1NJ08, Q5ZME2, R4GM10, A0A1L1RKH8, A0A1D5PPD3, F1NH87, A0A1D5NYM1, F1NU17, P00504, F1NN08, F1NW43, F1P269, Q5ZL72, F1NZ30, P01012	84	47	290	1.24873	0.257736
GOTERM_BP_DIRECT	GO:0050821~protein stabilization	5	5.31915	Q9I8D6, A0A1D5NUC1, Q5ZL72, A0A1D5PPD3, F1NH87	80	12	279	1.45312	0.261641
GOTERM_BP_DIRECT	GO:0016192~vesicle-mediated transport	3	3.19149	Q90965, F1NN08, F1N998	80	6	279	1.74375	0.272855
GOTERM_BP_DIRECT	GO:0005975~carbohydrate metabolic process	3	3.19149	E1BSN7, A0A1D5PLS2, Q5ZME2	80	6	279	1.74375	0.272855
GOTERM_BP_DIRECT	GO:0000226~microtubule cytoskeleton organization	3	3.19149	P28685, E1C6D1, F1NH87	80	6	279	1.74375	0.272855
GOTERM_BP_DIRECT	GO:0007155~cell adhesion	3	3.19149	P28685, Q03696, P26007	80	6	279	1.74375	0.272855
GOTERM_CC_DIRECT	GO:0015629~actin cytoskeleton	3	3.19149	E1BSX2, Z4YJB8, P21566	84	6	290	1.72619	0.273555
GOTERM_MF_DIRECT	GO:0005543~phospholipid binding	1	1.06383	A0A1D5PJY1	78	2	277	1.77564	0.281588
GOTERM_MF_DIRECT	GO:0001047~core promoter binding	1	1.06383	A0A1D5P8I3	78	2	277	1.77564	0.281588
GOTERM_MF_DIRECT	GO:0004190~aspartic-type endopeptidase activity	1	1.06383	Q05744	78	2	277	1.77564	0.281588
GOTERM_MF_DIRECT	GO:0008289~lipid binding	1	1.06383	Q05423	78	2	277	1.77564	0.281588
GOTERM_MF_DIRECT	GO:0005096~GTPase activator activity	1	1.06383	F1NCZ2	78	2	277	1.77564	0.281588
GOTERM_MF_DIRECT	GO:0016597~amino acid binding	1	1.06383	E1C7B5	78	2	277	1.77564	0.281588
GOTERM_MF_DIRECT	GO:0004129~cytochrome-c oxidase activity	1	1.06383	Q5ZJV5	78	2	277	1.77564	0.281588
GOTERM_MF_DIRECT	GO:0016757~transferase activity, transferring glycosyl groups	1	1.06383	F1NNS1	78	2	277	1.77564	0.281588
GOTERM_MF_DIRECT	GO:0097157~pre-mRNA intronic binding	1	1.06383	Q5ZME1	78	2	277	1.77564	0.281588
GOTERM_MF_DIRECT	GO:0003730~mRNA 3'-UTR binding	1	1.06383	Q5ZME1	78	2	277	1.77564	0.281588
GOTERM_MF_DIRECT	GO:0015631~tubulin binding	1	1.06383	P62758	78	2	277	1.77564	0.281588
GOTERM_MF_DIRECT	GO:0019003~GDP binding	1	1.06383	Q90965	78	2	277	1.77564	0.281588
GOTERM_MF_DIRECT	GO:0001786~phosphatidylserine binding	1	1.06383	A0A1D5PFJ6	78	2	277	1.77564	0.281588
GOTERM_MF_DIRECT	GO:0000978~RNA polymerase II core promoter proximal region sequence-specific DNA binding	1	1.06383	A0A1D5NW46	78	2	277	1.77564	0.281588
GOTERM_MF_DIRECT	GO:0030060~L-malate dehydrogenase activity	1	1.06383	Q5ZME2	78	2	277	1.77564	0.281588
GOTERM_MF_DIRECT	GO:0004683~calmodulin-dependent protein kinase activity	1	1.06383	A0A1D5NZU2	78	2	277	1.77564	0.281588
GOTERM_MF_DIRECT	GO:0048037~cofactor binding	1	1.06383	F1P269	78	2	277	1.77564	0.281588
GOTERM_MF_DIRECT	GO:0016810~hydrolase activity, acting on carbon-nitrogen (but not peptide) bonds	1	1.06383	Q71SG2	78	2	277	1.77564	0.281588
GOTERM_MF_DIRECT	GO:0001530~lipopolysaccharide binding	1	1.06383	Q5ZL72	78	2	277	1.77564	0.281588
GOTERM_BP_DIRECT	GO:0051491~positive regulation of filopodium assembly	1	1.06383	F1N998	80	2	279	1.74375	0.286738
GOTERM_BP_DIRECT	GO:0032733~positive regulation of interleukin-10 production	1	1.06383	Q5ZL72	80	2	279	1.74375	0.286738
GOTERM_BP_DIRECT	GO:0001755~neural crest cell migration	1	1.06383	C7G537	80	2	279	1.74375	0.286738
GOTERM_BP_DIRECT	GO:0006486~protein glycosylation	1	1.06383	F1NNS1	80	2	279	1.74375	0.286738
GOTERM_BP_DIRECT	GO:0000028~ribosomal small subunit assembly	1	1.06383	F1NTT2	80	2	279	1.74375	0.286738
GOTERM_BP_DIRECT	GO:0006629~lipid metabolic process	1	1.06383	F1P269	80	2	279	1.74375	0.286738
GOTERM_BP_DIRECT	GO:0018105~peptidyl-serine phosphorylation	1	1.06383	A0A1D5NZU2	80	2	279	1.74375	0.286738
GOTERM_BP_DIRECT	GO:0045214~sarcomere organization	1	1.06383	P21566	80	2	279	1.74375	0.286738
GOTERM_BP_DIRECT	GO:0010613~positive regulation of cardiac muscle hypertrophy	1	1.06383	A0A1D5NZU2	80	2	279	1.74375	0.286738
GOTERM_BP_DIRECT	GO:0051085~chaperone mediated protein folding requiring cofactor	1	1.06383	A0A1D5PFJ6	80	2	279	1.74375	0.286738
GOTERM_BP_DIRECT	GO:0006919~activation of cysteine-type endopeptidase activity involved in apoptotic process	1	1.06383	Q5ZL72	80	2	279	1.74375	0.286738
GOTERM_BP_DIRECT	GO:0032496~response to lipopolysaccharide	1	1.06383	A0A1D5P4L7	80	2	279	1.74375	0.286738
GOTERM_BP_DIRECT	GO:0001578~microtubule bundle formation	1	1.06383	E1C6D1	80	2	279	1.74375	0.286738
GOTERM_BP_DIRECT	GO:0032735~positive regulation of interleukin-12 production	1	1.06383	Q5ZL72	80	2	279	1.74375	0.286738
GOTERM_BP_DIRECT	GO:0031623~receptor internalization	1	1.06383	P28685	80	2	279	1.74375	0.286738
GOTERM_BP_DIRECT	GO:0043044~ATP-dependent chromatin remodeling	1	1.06383	A0A1D5NW46	80	2	279	1.74375	0.286738
GOTERM_BP_DIRECT	GO:0006508~proteolysis	1	1.06383	Q05744	80	2	279	1.74375	0.286738
GOTERM_BP_DIRECT	GO:0046777~protein autophosphorylation	1	1.06383	A0A1D5NZU2	80	2	279	1.74375	0.286738
GOTERM_BP_DIRECT	GO:0007519~skeletal muscle tissue development	1	1.06383	P21566	80	2	279	1.74375	0.286738
GOTERM_BP_DIRECT	GO:0046034~ATP metabolic process	1	1.06383	A0A1D5PFJ6	80	2	279	1.74375	0.286738
GOTERM_BP_DIRECT	GO:0046716~muscle cell cellular homeostasis	1	1.06383	P21566	80	2	279	1.74375	0.286738
GOTERM_BP_DIRECT	GO:0007626~locomotory behavior	1	1.06383	F1NLH0	80	2	279	1.74375	0.286738
GOTERM_BP_DIRECT	GO:0006986~response to unfolded protein	1	1.06383	Q5ZL72	80	2	279	1.74375	0.286738
GOTERM_BP_DIRECT	GO:0000281~mitotic cytokinesis	1	1.06383	A0A1D5PJY1	80	2	279	1.74375	0.286738
GOTERM_BP_DIRECT	GO:0043547~positive regulation of GTPase activity	1	1.06383	P26007	80	2	279	1.74375	0.286738
GOTERM_BP_DIRECT	GO:1902177~positive regulation of oxidative stress-induced intrinsic apoptotic signaling pathway	1	1.06383	A0A1D5P8I3	80	2	279	1.74375	0.286738
GOTERM_BP_DIRECT	GO:0007413~axonal fasciculation	1	1.06383	P28685	80	2	279	1.74375	0.286738
GOTERM_BP_DIRECT	GO:0060048~cardiac muscle contraction	1	1.06383	A0A1D5NZU2	80	2	279	1.74375	0.286738
GOTERM_BP_DIRECT	GO:0006468~protein phosphorylation	1	1.06383	A0A1D5NZU2	80	2	279	1.74375	0.286738
GOTERM_BP_DIRECT	GO:0045471~response to ethanol	1	1.06383	P00508	80	2	279	1.74375	0.286738
GOTERM_BP_DIRECT	GO:0032727~positive regulation of interferon-alpha production	1	1.06383	Q5ZL72	80	2	279	1.74375	0.286738
GOTERM_BP_DIRECT	GO:0010501~RNA secondary structure unwinding	1	1.06383	Q5F491	80	2	279	1.74375	0.286738
GOTERM_BP_DIRECT	GO:0045109~intermediate filament organization	1	1.06383	F1NJ08	80	2	279	1.74375	0.286738
GOTERM_BP_DIRECT	GO:0032570~response to progesterone	1	1.06383	P01012	80	2	279	1.74375	0.286738
GOTERM_BP_DIRECT	GO:0051384~response to glucocorticoid	1	1.06383	P00504	80	2	279	1.74375	0.286738
GOTERM_BP_DIRECT	GO:0008299~isoprenoid biosynthetic process	1	1.06383	F1N9T0	80	2	279	1.74375	0.286738
GOTERM_BP_DIRECT	GO:0043588~skin development	1	1.06383	P26007	80	2	279	1.74375	0.286738
GOTERM_BP_DIRECT	GO:0006336~DNA replication-independent nucleosome assembly	1	1.06383	P70081	80	2	279	1.74375	0.286738
GOTERM_BP_DIRECT	GO:0034063~stress granule assembly	1	1.06383	A0A1D5P359	80	2	279	1.74375	0.286738
GOTERM_BP_DIRECT	GO:0007229~integrin-mediated signaling pathway	1	1.06383	P26007	80	2	279	1.74375	0.286738
GOTERM_BP_DIRECT	GO:0018279~protein N-linked glycosylation via asparagine	1	1.06383	F1NNS1	80	2	279	1.74375	0.286738
GOTERM_BP_DIRECT	GO:0072583~clathrin-mediated endocytosis	1	1.06383	F1N998	80	2	279	1.74375	0.286738
GOTERM_BP_DIRECT	GO:0007163~establishment or maintenance of cell polarity	1	1.06383	Q90WD0	80	2	279	1.74375	0.286738
GOTERM_BP_DIRECT	GO:0006335~DNA replication-dependent nucleosome assembly	1	1.06383	P70081	80	2	279	1.74375	0.286738
GOTERM_BP_DIRECT	GO:0009409~response to cold	1	1.06383	Q5ZL72	80	2	279	1.74375	0.286738
GOTERM_CC_DIRECT	GO:0030141~secretory granule	1	1.06383	Q5ZL72	84	2	290	1.72619	0.289655
GOTERM_CC_DIRECT	GO:0045202~synapse	1	1.06383	E1C4M6	84	2	290	1.72619	0.289655
GOTERM_CC_DIRECT	GO:0016581~NuRD complex	1	1.06383	A0A1D5NW46	84	2	290	1.72619	0.289655
GOTERM_CC_DIRECT	GO:0000786~nucleosome	1	1.06383	P70081	84	2	290	1.72619	0.289655
GOTERM_CC_DIRECT	GO:0005681~spliceosomal complex	1	1.06383	F1NHI3	84	2	290	1.72619	0.289655
GOTERM_CC_DIRECT	GO:0031225~anchored component of membrane	1	1.06383	P28685	84	2	290	1.72619	0.289655
GOTERM_CC_DIRECT	GO:0008250~oligosaccharyltransferase complex	1	1.06383	F1NNS1	84	2	290	1.72619	0.289655
GOTERM_CC_DIRECT	GO:0005604~basement membrane	1	1.06383	P26007	84	2	290	1.72619	0.289655
GOTERM_CC_DIRECT	GO:0005903~brush border	1	1.06383	Q90WD0	84	2	290	1.72619	0.289655
GOTERM_CC_DIRECT	GO:0005811~lipid particle	1	1.06383	F1NH87	84	2	290	1.72619	0.289655
GOTERM_CC_DIRECT	GO:0071204~histone pre-mRNA 3'end processing complex	1	1.06383	A0A1D5PJG4	84	2	290	1.72619	0.289655
GOTERM_CC_DIRECT	GO:0005793~endoplasmic reticulum-Golgi intermediate compartment	1	1.06383	P09102	84	2	290	1.72619	0.289655
GOTERM_CC_DIRECT	GO:0016605~PML body	1	1.06383	A0A1D5PPD3	84	2	290	1.72619	0.289655
GOTERM_CC_DIRECT	GO:0031410~cytoplasmic vesicle	1	1.06383	F1NBV0	84	2	290	1.72619	0.289655
GOTERM_CC_DIRECT	GO:0005853~eukaryotic translation elongation factor 1 complex	1	1.06383	F1N9H4	84	2	290	1.72619	0.289655
GOTERM_CC_DIRECT	GO:0071944~cell periphery	1	1.06383	Q05423	84	2	290	1.72619	0.289655
GOTERM_CC_DIRECT	GO:0005802~trans-Golgi network	1	1.06383	F1N998	84	2	290	1.72619	0.289655
GOTERM_CC_DIRECT	GO:0005751~mitochondrial respiratory chain complex IV	1	1.06383	Q5ZJV5	84	2	290	1.72619	0.289655
GOTERM_CC_DIRECT	GO:0008076~voltage-gated potassium channel complex	1	1.06383	P28685	84	2	290	1.72619	0.289655
GOTERM_CC_DIRECT	GO:0030017~sarcomere	1	1.06383	F1NN08	84	2	290	1.72619	0.289655
GOTERM_CC_DIRECT	GO:0042645~mitochondrial nucleoid	1	1.06383	A0A1L1RVM8	84	2	290	1.72619	0.289655
GOTERM_CC_DIRECT	GO:0030018~Z disc	1	1.06383	P21566	84	2	290	1.72619	0.289655
GOTERM_CC_DIRECT	GO:0043231~intracellular membrane-bounded organelle	1	1.06383	F1NHT3	84	2	290	1.72619	0.289655
GOTERM_CC_DIRECT	GO:0031965~nuclear membrane	1	1.06383	F1NH87	84	2	290	1.72619	0.289655
GOTERM_CC_DIRECT	GO:0035098~ESC/E(Z) complex	1	1.06383	A0A1D5NW46	84	2	290	1.72619	0.289655
GOTERM_BP_DIRECT	GO:0007264~small GTPase mediated signal transduction	3	3.19149	F1NCZ2, Q90965, F1NN08	80	7	279	1.49464	0.305376
GOTERM_CC_DIRECT	GO:0005759~mitochondrial matrix	3	3.19149	P00508, A0A1D5PLS2, Q5ZL72	84	7	290	1.47959	0.307999
GOTERM_CC_DIRECT	GO:0005832~chaperonin-containing T-complex	3	3.19149	Q9I8D6, A0A1D5NUC1, F1NWH9	84	7	290	1.47959	0.307999
GOTERM_CC_DIRECT	GO:0005794~Golgi apparatus	3	3.19149	F1NCZ2, F1NN08, A0A1D5P6Q5	84	7	290	1.47959	0.307999
GOTERM_CC_DIRECT	GO:0071013~catalytic step 2 spliceosome	3	3.19149	A0A1D5PJG4, A0A1D5P954, Q5ZME1	84	7	290	1.47959	0.307999
GOTERM_MF_DIRECT	GO:0003677~DNA binding	1	1.06383	P70081	78	8	277	0.44391	0.337758
GOTERM_MF_DIRECT	GO:0046872~metal ion binding	3	3.19149	F1P269, P26007, A0A1D5P4L7	78	17	277	0.626697	0.338725
GOTERM_CC_DIRECT	GO:0048471~perinuclear region of cytoplasm	1	1.06383	E1BSN7	84	9	290	0.383598	0.371567
GOTERM_MF_DIRECT	GO:0005509~calcium ion binding	4	4.25532	P62758, F1NHT3, A0A1D5P5X1, P01012	78	10	277	1.42051	0.383218
GOTERM_CC_DIRECT	GO:0005789~endoplasmic reticulum membrane	4	4.25532	Q90965, F1NNS1, F1NIM4, A0A1D5NXD7	84	10	290	1.38095	0.386526
GOTERM_CC_DIRECT	GO:0022627~cytosolic small ribosomal subunit	2	2.12766	F1NTT2, F1NU56	84	12	290	0.575397	0.428621
GOTERM_MF_DIRECT	GO:0003723~RNA binding	5	5.31915	A0A1D5NVI1, F1NTT2, A0A1D5P359, F1NLH0, A0A1L1RY47	78	13	277	1.36588	0.445429
GOTERM_CC_DIRECT	GO:0009897~external side of plasma membrane	2	2.12766	P09102, P26007	84	4	290	1.72619	0.454644
GOTERM_CC_DIRECT	GO:0016363~nuclear matrix	2	2.12766	A0A1D5P8I3, P21566	84	4	290	1.72619	0.454644
GOTERM_CC_DIRECT	GO:0005615~extracellular space	10	10.6383	F1NBV0, Q5F3C9, Q05744, Q5ZME2, A0A1L1RKH8, Q5ZL72, P21566, A0A1D5P4L7, F1NZ30, P01012	84	29	290	1.19048	0.454852
GOTERM_MF_DIRECT	GO:0005516~calmodulin binding	2	2.12766	A0A1D5NZU2, F1NHT3	78	5	277	1.42051	0.474495
GOTERM_MF_DIRECT	GO:0004843~thiol-dependent ubiquitin-specific protease activity	2	2.12766	E1C4M6, A0A1D5PPD3	78	5	277	1.42051	0.474495
GOTERM_BP_DIRECT	GO:0001649~osteoblast differentiation	2	2.12766	A0A1D5PJG4, A0A1D5P6Q5	80	5	279	1.395	0.476392
GOTERM_BP_DIRECT	GO:0006810~transport	2	2.12766	Q05423, F1NLL4	80	5	279	1.395	0.476392
GOTERM_BP_DIRECT	GO:0045454~cell redox homeostasis	2	2.12766	F1NBV0, P09102	80	5	279	1.395	0.476392
GOTERM_CC_DIRECT	GO:0000139~Golgi membrane	2	2.12766	Q90965, A0A1D5NXD7	84	5	290	1.38095	0.477688
GOTERM_MF_DIRECT	GO:0000287~magnesium ion binding	2	2.12766	F1NW43, A0A1L1RKH8	78	6	277	1.18376	0.515216
GOTERM_BP_DIRECT	GO:0002181~cytoplasmic translation	1	1.06383	A0A1D5NVI1	80	6	279	0.58125	0.517849
GOTERM_CC_DIRECT	GO:0005765~lysosomal membrane	1	1.06383	Q90965	84	6	290	0.575397	0.518438
GOTERM_MF_DIRECT	GO:0051082~unfolded protein binding	1	1.06383	F1NWH9	78	7	277	0.507326	0.54168
GOTERM_MF_DIRECT	GO:0008017~microtubule binding	3	3.19149	Q71SG2, E1C6D1, F1NH87	78	9	277	1.18376	0.583695
GOTERM_BP_DIRECT	GO:1901998~toxin transport	3	3.19149	Q9I8D6, A0A1D5NUC1, F1NWH9	80	9	279	1.1625	0.586388
GOTERM_MF_DIRECT	GO:0005515~protein binding	2	2.12766	Q5ZL72, A0A1D5P4L7	78	10	277	0.710256	0.60263
GOTERM_CC_DIRECT	GO:0005813~centrosome	2	2.12766	Q9I8D6, Q5ZME2	84	10	290	0.690476	0.605808
GOTERM_CC_DIRECT	GO:0005925~focal adhesion	11	11.7021	A0A1D5PFJ6, P53478, A0A1D5NVI1, F1NCZ2, E1BRL4, F1NJ08, E1BSX2, P09102, Q90WD0, F1NN08, P26007	84	34	290	1.11695	0.618676
GOTERM_CC_DIRECT	GO:0005743~mitochondrial inner membrane	3	3.19149	A0A1L1RVM8, P00508, Q5ZL72	84	13	290	0.796703	0.647387
GOTERM_CC_DIRECT	GO:0005874~microtubule	6	6.38298	Q9I8D6, A0A1D5NUC1, Q71SG2, P09244, E1C6D1, A0A1D5NW27	84	18	290	1.15079	0.695594
GOTERM_CC_DIRECT	GO:0005634~nucleus	18	19.1489	A0A1D5PFJ6, Q90965, Q90705, A0A1D5P359, A0A1D5NZU2, A0A1D5NW46, A0A1L1RKH8, A0A1D5PPD3, F1NH87, A0A1D5NYM1, A0A1L1RVM8, E1BZS2, A0A1D5P8I3, P00504, F1NW43, A0A1D5P9A5, P21566, Q5ZJV5	84	66	290	0.941558	0.701861
GOTERM_CC_DIRECT	GO:0043234~protein complex	1	1.06383	F1NNS1	84	3	290	1.15079	0.779553
GOTERM_CC_DIRECT	GO:0036464~cytoplasmic ribonucleoprotein granule	1	1.06383	Q5F491	84	3	290	1.15079	0.779553
GOTERM_CC_DIRECT	GO:0005844~polysome	1	1.06383	Q90705	84	3	290	1.15079	0.779553
GOTERM_CC_DIRECT	GO:0072562~blood microparticle	1	1.06383	A0A1D5PFJ6	84	3	290	1.15079	0.779553
GOTERM_CC_DIRECT	GO:0005875~microtubule associated complex	1	1.06383	E1C6D1	84	3	290	1.15079	0.779553
GOTERM_CC_DIRECT	GO:0005769~early endosome	1	1.06383	Q5ZL72	84	3	290	1.15079	0.779553
GOTERM_CC_DIRECT	GO:0000784~nuclear chromosome, telomeric region	1	1.06383	P70081	84	3	290	1.15079	0.779553
GOTERM_CC_DIRECT	GO:0030864~cortical actin cytoskeleton	1	1.06383	Z4YJB8	84	3	290	1.15079	0.779553
GOTERM_CC_DIRECT	GO:0000785~chromatin	1	1.06383	A0A1D5P8I3	84	3	290	1.15079	0.779553
GOTERM_CC_DIRECT	GO:0005788~endoplasmic reticulum lumen	1	1.06383	P09102	84	3	290	1.15079	0.779553
GOTERM_CC_DIRECT	GO:0016607~nuclear speck	1	1.06383	A0A1L1RY47	84	3	290	1.15079	0.779553
GOTERM_CC_DIRECT	GO:0005938~cell cortex	1	1.06383	F1NHT3	84	3	290	1.15079	0.779553
GOTERM_BP_DIRECT	GO:0007275~multicellular organism development	1	1.06383	A0A1D5PPD3	80	3	279	1.1625	0.779925
GOTERM_BP_DIRECT	GO:0001764~neuron migration	1	1.06383	P28685	80	3	279	1.1625	0.779925
GOTERM_BP_DIRECT	GO:0010468~regulation of gene expression	1	1.06383	Q5F491	80	3	279	1.1625	0.779925
GOTERM_BP_DIRECT	GO:0051726~regulation of cell cycle	1	1.06383	A0A1D5PFJ6	80	3	279	1.1625	0.779925
GOTERM_BP_DIRECT	GO:0050885~neuromuscular process controlling balance	1	1.06383	E1C7B5	80	3	279	1.1625	0.779925
GOTERM_BP_DIRECT	GO:0007628~adult walking behavior	1	1.06383	P28685	80	3	279	1.1625	0.779925
GOTERM_BP_DIRECT	GO:0006695~cholesterol biosynthetic process	1	1.06383	F1N9T0	80	3	279	1.1625	0.779925
GOTERM_BP_DIRECT	GO:2001243~negative regulation of intrinsic apoptotic signaling pathway	1	1.06383	A0A1L1RVM8	80	3	279	1.1625	0.779925
GOTERM_BP_DIRECT	GO:0007283~spermatogenesis	1	1.06383	R4GL78	80	3	279	1.1625	0.779925
GOTERM_BP_DIRECT	GO:0046677~response to antibiotic	1	1.06383	E1C7B5	80	3	279	1.1625	0.779925
GOTERM_BP_DIRECT	GO:0006108~malate metabolic process	1	1.06383	Q5ZME2	80	3	279	1.1625	0.779925
GOTERM_BP_DIRECT	GO:0006334~nucleosome assembly	1	1.06383	E1BZS2	80	3	279	1.1625	0.779925
GOTERM_BP_DIRECT	GO:0016055~Wnt signaling pathway	1	1.06383	Q5ZKK4	80	3	279	1.1625	0.779925
GOTERM_BP_DIRECT	GO:0007605~sensory perception of sound	1	1.06383	E1C7B5	80	3	279	1.1625	0.779925
GOTERM_BP_DIRECT	GO:0071353~cellular response to interleukin-4	1	1.06383	A0A1D5P6Q5	80	3	279	1.1625	0.779925
GOTERM_BP_DIRECT	GO:0061077~chaperone-mediated protein folding	1	1.06383	F1NIM4	80	3	279	1.1625	0.779925
GOTERM_BP_DIRECT	GO:0007030~Golgi organization	1	1.06383	Q90965	80	3	279	1.1625	0.779925
GOTERM_BP_DIRECT	GO:0030308~negative regulation of cell growth	1	1.06383	A0A1L1RKH8	80	3	279	1.1625	0.779925
GOTERM_BP_DIRECT	GO:0008380~RNA splicing	1	1.06383	A0A1L1RY47	80	3	279	1.1625	0.779925
GOTERM_BP_DIRECT	GO:0007059~chromosome segregation	1	1.06383	Q5F491	80	3	279	1.1625	0.779925
GOTERM_CC_DIRECT	GO:0043209~myelin sheath	12	12.766	A0A1D5PFJ6, F1NCZ2, A0A1L1RVM8, P00508, P28685, A0A1D5NUC1, Q71SG2, F1N9H4, Q5ZME2, F1NW43, Q5ZL72, F1NZ30	84	40	290	1.03571	0.780352
GOTERM_MF_DIRECT	GO:0005215~transporter activity	1	1.06383	Q05423	78	3	277	1.18376	0.780728
GOTERM_MF_DIRECT	GO:0016491~oxidoreductase activity	1	1.06383	F1NCZ2	78	3	277	1.18376	0.780728
GOTERM_MF_DIRECT	GO:0003682~chromatin binding	1	1.06383	A0A1D5P8I3	78	3	277	1.18376	0.780728
GOTERM_MF_DIRECT	GO:0042803~protein homodimerization activity	1	1.06383	P00508	78	3	277	1.18376	0.780728
GOTERM_MF_DIRECT	GO:0030246~carbohydrate binding	1	1.06383	P28685	78	3	277	1.18376	0.780728
GOTERM_MF_DIRECT	GO:0051287~NAD binding	1	1.06383	F1NH87	78	3	277	1.18376	0.780728
GOTERM_MF_DIRECT	GO:0003756~protein disulfide isomerase activity	1	1.06383	P09102	78	3	277	1.18376	0.780728
GOTERM_MF_DIRECT	GO:0051087~chaperone binding	1	1.06383	Q5ZL72	78	4	277	0.887821	0.789798
GOTERM_MF_DIRECT	GO:0004197~cysteine-type endopeptidase activity	1	1.06383	A0A1D5PPD3	78	4	277	0.887821	0.789798
GOTERM_MF_DIRECT	GO:0050660~flavin adenine dinucleotide binding	1	1.06383	A0A1D5P6Q5	78	4	277	0.887821	0.789798
GOTERM_MF_DIRECT	GO:0016787~hydrolase activity	1	1.06383	F1NBV0	78	4	277	0.887821	0.789798
GOTERM_BP_DIRECT	GO:0034976~response to endoplasmic reticulum stress	1	1.06383	P09102	80	4	279	0.871875	0.790557
GOTERM_BP_DIRECT	GO:0006397~mRNA processing	1	1.06383	A0A1L1RY47	80	4	279	0.871875	0.790557
GOTERM_BP_DIRECT	GO:0010628~positive regulation of gene expression	1	1.06383	F1NJ08	80	4	279	0.871875	0.790557
GOTERM_BP_DIRECT	GO:0006413~translational initiation	1	1.06383	Q5F491	80	4	279	0.871875	0.790557
GOTERM_BP_DIRECT	GO:0009615~response to virus	1	1.06383	A0A1L1RKH8	80	4	279	0.871875	0.790557
GOTERM_BP_DIRECT	GO:0051262~protein tetramerization	1	1.06383	A0A1D5P9A5	80	4	279	0.871875	0.790557
GOTERM_BP_DIRECT	GO:0006897~endocytosis	1	1.06383	Q71SG2	80	4	279	0.871875	0.790557
GOTERM_CC_DIRECT	GO:0034704~calcium channel complex	1	1.06383	A0A1D5NZU2	84	4	290	0.863095	0.791075
GOTERM_CC_DIRECT	GO:0031982~vesicle	1	1.06383	P01012	84	4	290	0.863095	0.791075
GOTERM_CC_DIRECT	GO:0005777~peroxisome	1	1.06383	F1NJ08	84	4	290	0.863095	0.791075
GOTERM_MF_DIRECT	GO:0005198~structural molecule activity	1	1.06383	F1NJ08	78	5	277	0.710256	0.811357
GOTERM_BP_DIRECT	GO:0031175~neuron projection development	1	1.06383	E1C6D1	80	5	279	0.6975	0.813405
GOTERM_BP_DIRECT	GO:0021762~substantia nigra development	1	1.06383	F1NZ30	80	5	279	0.6975	0.813405
GOTERM_BP_DIRECT	GO:0006351~transcription, DNA-templated	1	1.06383	A0A1D5NW46	80	5	279	0.6975	0.813405
GOTERM_CC_DIRECT	GO:0030425~dendrite	1	1.06383	Q71SG2	84	5	290	0.690476	0.814634
GOTERM_CC_DIRECT	GO:0019898~extrinsic component of membrane	1	1.06383	A0A1D5PAX1	84	5	290	0.690476	0.814634
GOTERM_CC_DIRECT	GO:0030027~lamellipodium	1	1.06383	Q90WD0	84	5	290	0.690476	0.814634
GOTERM_MF_DIRECT	GO:0003755~peptidyl-prolyl cis-trans isomerase activity	1	1.06383	F1NIM4	78	6	277	0.59188	0.837712
GOTERM_MF_DIRECT	GO:0005506~iron ion binding	1	1.06383	A0A1D5P4L7	78	6	277	0.59188	0.837712
GOTERM_CC_DIRECT	GO:0002199~zona pellucida receptor complex	2	2.12766	Q9I8D6, A0A1D5NUC1	84	6	290	1.15079	0.838049
GOTERM_BP_DIRECT	GO:0045944~positive regulation of transcription from RNA polymerase II promoter	2	2.12766	A0A1D5NW46, P26007	80	6	279	1.1625	0.838602
GOTERM_BP_DIRECT	GO:0006099~tricarboxylic acid cycle	2	2.12766	A0A1D5PLS2, Q5ZME2	80	6	279	1.1625	0.838602
GOTERM_BP_DIRECT	GO:1904871~positive regulation of protein localization to Cajal body	2	2.12766	Q9I8D6, A0A1D5NUC1	80	6	279	1.1625	0.838602
GOTERM_BP_DIRECT	GO:0043066~negative regulation of apoptotic process	2	2.12766	Q5ZL72, F1NH87	80	6	279	1.1625	0.838602
GOTERM_BP_DIRECT	GO:0007339~binding of sperm to zona pellucida	2	2.12766	Q9I8D6, A0A1D5NUC1	80	6	279	1.1625	0.838602
GOTERM_BP_DIRECT	GO:0032212~positive regulation of telomere maintenance via telomerase	2	2.12766	Q9I8D6, A0A1D5NUC1	80	7	279	0.996429	0.838602
GOTERM_BP_DIRECT	GO:1904874~positive regulation of telomerase RNA localization to Cajal body	2	2.12766	Q9I8D6, A0A1D5NUC1	80	7	279	0.996429	0.838602
GOTERM_BP_DIRECT	GO:0006355~regulation of transcription, DNA-templated	2	2.12766	A0A1D5P8I3, A0A1D5NW46	80	7	279	0.996429	0.838602
GOTERM_BP_DIRECT	GO:1904851~positive regulation of establishment of protein localization to telomere	2	2.12766	Q9I8D6, A0A1D5NUC1	80	7	279	0.996429	0.838602
GOTERM_MF_DIRECT	GO:0003729~mRNA binding	2	2.12766	F1NLH0, A0A1D5P9A5	78	7	277	1.01465	0.83861
GOTERM_CC_DIRECT	GO:0044297~cell body	2	2.12766	Q9I8D6, A0A1D5NUC1	84	7	290	0.986395	0.838733
GOTERM_BP_DIRECT	GO:0006511~ubiquitin-dependent protein catabolic process	2	2.12766	E1C4M6, A0A1D5PPD3	80	8	279	0.871875	0.846514
GOTERM_CC_DIRECT	GO:0030424~axon	2	2.12766	Q71SG2, Q03696	84	8	290	0.863095	0.847281
GOTERM_MF_DIRECT	GO:0042802~identical protein binding	2	2.12766	P00504, F1NH87	78	9	277	0.789174	0.857373
GOTERM_BP_DIRECT	GO:0055114~oxidation-reduction process	3	3.19149	F1NBV0, A0A1D5P6Q5, F1NH87	80	11	279	0.951136	0.86718
GOTERM_CC_DIRECT	GO:0043005~neuron projection	3	3.19149	E1C7B5, F1NJ08, E1C6D1	84	11	290	0.941558	0.867626
GOTERM_CC_DIRECT	GO:0005783~endoplasmic reticulum	4	4.25532	Q5ZKK4, P09102, A0A1D5P5X1, P01012	84	13	290	1.06227	0.881388
GOTERM_BP_DIRECT	GO:0006457~protein folding	5	5.31915	Q5ZKK4, Q9I8D6, F1NIM4, P09102, F1NWH9	80	18	279	0.96875	0.893934
GOTERM_CC_DIRECT	GO:0016021~integral component of membrane	6	6.38298	F1NSL7, A0A1L1RVM8, F1NNS1, E1C7B5, Q03696, Q5ZJV5	84	21	290	0.986395	0.901615
GOTERM_CC_DIRECT	GO:0005730~nucleolus	6	6.38298	A0A1D5PJY1, A0A1D5NVI1, R4GL78, F1NU56, E1C6D1, A0A1D5P5X1	84	22	290	0.941558	0.903946
GOTERM_CC_DIRECT	GO:0005654~nucleoplasm	9	9.57447	P70081, Q9I8D6, E1BRL4, F1NIM4, F1N9T0, A0A1D5P954, Q05423, F1P269, Q5ZME1	84	33	290	0.941558	0.920326
GOTERM_CC_DIRECT	GO:0005739~mitochondrion	10	10.6383	P84172, P00508, Q71SG2, P00504, A0A1D5PLS2, Q5ZME2, F1NW43, A0A1D5P6Q5, R4GM10, F1NZ30	84	35	290	0.986395	0.921317
GOTERM_CC_DIRECT	GO:0005737~cytoplasm	22	23.4043	A0A1D5PFJ6, R4GL78, Q71SG2, F1NHI3, Q90705, E1BSX2, A0A1D5PAX1, Q90WD0, Q05423, A0A1D5NW46, A0A1D5PPD3, F1NH87, Q5ZME1, A0A1D5NW27, F1NWH9, A0A1L1RY47, F1NBV0, F1N9T0, F1P269, P09244, E1C6D1, Q5ZL72	84	75	290	1.0127	0.941635
