# Supplementary material for: Non-Apoptotic Caspase Activity Preferentially Targets a Novel Consensus Sequence Associated With Cytoskeletal Proteins in the Developing Auditory Brainstem
Source: Front Cell Dev Biol. 2022 Mar 7;10:844844. doi: 10.3389/fcell.2022.844844 (PMC8940215; doi:10.3389/fcell.2022.844844)
Supplement: Supplementary file 3 [file Table4.XLSX]

## Sheet: Peptide Table D.X only
															Mass Spectrometry Data
Peptide ID (Unique Identifier)	SampleID (key to Sample Table)	Acc_Start (key to N-terminus Table)	Acc # (key to Protein Table)	Helper 1	Dataset	N-terminus start site (P1' position)	P4	P3	P2	P1	P1'	P2'	P3'	P4'	Peptide Length	m/z	z	ppm	Precursor mass	Retention time	MS score	Expectation Value	Peptide with modifications	Peptide without modifications	Possible match(es) to homologous proteins?	Possible tag ambiguity?	SCoC?
10000176551	100031	P08670_86	P08670	P08670100031	DSVDFSLA	86	D	S	V	D	F	S	L	A	12	803.371	2	-28	1606.74	38.075	41.5	0.00037	SerTyr-FSLADAINTEFK	FSLADAINTEFK		No	TRUE
10000176553	100031	Q92945_129	Q92945	Q92945100031	SQGDSISS	129	S	Q	G	D	S	I	S	S	14	579.297	3	-21	1737.89	27.385	43.3	5.6e-06	SerTyr-SISSQLGPIHPPPR	SISSQLGPIHPPPR		No
10000176555	100031	P16989_270	P16989	P16989100031	EMKDGVPE	270	E	M	K	D	G	V	P	E	14	565.614	3	-19	1696.84	24.433	41.4	3.6e-05	SerTyr-GVPEGAQLQGPVHR	GVPEGAQLQGPVHR		No
10000176563	100031	Q9Y2X7_419	Q9Y2X7	Q9Y2X7100031	DLSDGAVT	419	D	L	S	D	G	A	V	T	13	581.308	3	-17	1743.92	32.552	34	0.00018	SerTyr-GAVTLQEYLELKK	GAVTLQEYLELKK		No
10000176574	100031	P09874_73	P09874	P09874100031	VEVDGFSE	73	V	E	V	D	G	F	S	E	12	586.929	3	-20	1760.79	29.809	26.1	0.00031	SerTyr-GFSELRWDDQQK	GFSELRWDDQQK		No
10000176579	100031	O43169_11	O43169	O43169100031	SGSDGKGQ	11	S	G	S	D	G	K	G	Q	14	622.962	3	-8.7	1868.89	23.527	30	0.0023	SerTyr-GKGQEVETSVTYYR	GKGQEVETSVTYYR		No
10000176580	100031	O75934_15	O75934	O75934100031	VVVDALPY	15	V	V	V	D	A	L	P	Y	15	966.925	2	-36	1933.85	33.492	31.2	0.004	SerTyr-ALPYFDQGYEAPGVR	ALPYFDQGYEAPGVR		No
10000176582	100031	Q86Y82_218	Q86Y82	Q86Y82100031	DLIDSIEA	218	D	L	I	D	S	I	E	A	15	645.632	3	-14	1936.9	26.651	29.3	0.004	SerTyr-SIEANVESSEVHVER	SIEANVESSEVHVER		No
10000176585	100031	O15042_738	O15042	O15042100031	DDLDGVPL	738	D	D	L	D	G	V	P	L	12	503.913	3	-13	1511.74	21.54	24.4	0.0067	SerTyr-GVPLDATEDSKK	GVPLDATEDSKK		No
10000176588	100031	Q6PKG0_173	Q6PKG0	Q6PKG0100031	DFGDAINW	173	D	F	G	D	A	I	N	W	13	561.945	3	-17	1685.83	30.458	25.1	0.018	SerTyr-AINWPTPGEIAHK	AINWPTPGEIAHK		No
10000176591	100032	P08670_86	P08670	P08670100032	DSVDFSLA	86	D	S	V	D	F	S	L	A	12	803.365	2	-35	1606.73	38.973	42.8	2.6e-05	SerTyr-FSLADAINTEFK	FSLADAINTEFK		No	TRUE
10000176597	100032	Q92945_129	Q92945	Q92945100032	SQGDSISS	129	S	Q	G	D	S	I	S	S	14	579.299	3	-17	1737.9	28.293	44.8	5.6e-06	SerTyr-SISSQLGPIHPPPR	SISSQLGPIHPPPR		No
10000176608	100032	P55209_58	P55209	P55209100032	ERLDGLVE	58	E	R	L	D	G	L	V	E	15	941.444	2	-42	1882.89	34.625	36.8	0.0023	SerTyr-GLVETPTGYIESLPR	GLVETPTGYIESLPR		No
10000176617	100032	P16989_270	P16989	P16989100032	EMKDGVPE	270	E	M	K	D	G	V	P	E	14	565.616	3	-15	1696.85	24.493	25.2	0.015	SerTyr-GVPEGAQLQGPVHR	GVPEGAQLQGPVHR		No
10000176621	100067	P60709_158	P60709	P60709100067	DSGDGVTH	158	D	S	G	D	G	V	T	H	20	819.755	3	-17	2459.27	30.9	35	0.00047	SerTyr-GVTHTVPIYEGYALPHAILR	GVTHTVPIYEGYALPHAILR	yes	No	TRUE
10000176639	100067	Q6JBY9_273	Q6JBY9	Q6JBY9100067	EEVDGQHP	273	E	E	V	D	G	Q	H	P	23	908.739	3	-4.5	2726.22	21.997	60.4	8.3e-08	SerTyr-GQHPAQEEVPESPQTSGPEAENR	GQHPAQEEVPESPQTSGPEAENR		No
10000176640	100067	Q9UMY4_22	Q9UMY4	Q9UMY4100067	DLTDAYGP	22	D	L	T	D	A	Y	G	P	23	914.444	3	-14	2743.33	39.202	64.4	9.8e-08	SerTyr-AYGPPSNFLEIDIFNPQTVGVGR	AYGPPSNFLEIDIFNPQTVGVGR		No
10000176641	100067	O15042_738	O15042	O15042100067	DDLDGVPL	738	D	D	L	D	G	V	P	L	12	503.919	3	0.019	1511.76	21.875	38.9	0.00011	SerTyr-GVPLDATEDSKK	GVPLDATEDSKK		No
10000176644	100067	P55209_58	P55209	P55209100067	ERLDGLVE	58	E	R	L	D	G	L	V	E	15	627.98	3	-19	1883.94	32.56	52.8	6e-07	SerTyr-GLVETPTGYIESLPR	GLVETPTGYIESLPR		No
10000176649	100067	Q13541_26	Q13541	Q13541100067	VLGDGVQL	26	V	L	G	D	G	V	Q	L	26	938.784	3	-7.3	2816.35	32.226	53	3.8e-06	SerTyr-GVQLPPGDYSTTPGGTLFSTTPGGTR	GVQLPPGDYSTTPGGTLFSTTPGGTR		No
10000176655	100067	Q8N1G4_526	Q8N1G4	Q8N1G4100067	TEADAVSG	526	T	E	A	D	A	V	S	G	17	945.45	2	-17	1890.9	24.81	46.1	1.7e-05	SerTyr-AVSGQLPDPTTNPSAGK	AVSGQLPDPTTNPSAGK		No
10000176657	100067	P33991_133	P33991	P33991100067	LQSDGAAA	133	L	Q	S	D	G	A	A	A	17	641.969	3	-19	1925.91	29.431	54.1	2.3e-05	SerTyr-GAAAEDIVASEQSLGQK	GAAAEDIVASEQSLGQK		No
10000176658	100067	O60664_220	O60664	O60664100067	TSLDGFDV	220	T	S	L	D	G	F	D	V	11	742.832	2	-37	1485.66	25.915	41.8	2.5e-05	SerTyr-GFDVASVQQQR	GFDVASVQQQR		No
10000176660	100067	Q13177_149	Q13177	Q13177100067	PEKDGFPS	149	P	E	K	D	G	F	P	S	12	705.343	2	-19	1410.69	26.387	40.3	3.2e-05	SerTyr-GFPSGTPALNAK	GFPSGTPALNAK		No
10000176661	100067	Q96P70_964	Q96P70	Q96P70100067	EEEDGLAG	964	E	E	E	D	G	L	A	G	15	868.959	2	-19	1737.92	41.767	42.7	3.2e-05	SerTyr-GLAGQLLSDILATSK	GLAGQLLSDILATSK		No
10000176663	100067	P26599_173	P26599	P26599100067	AAVDAGMA	173	A	A	V	D	A	G	M	A	13	769.871	2	-7.1	1539.74	26.65	40.3	6.9e-05	SerTyr-AGMAMAGQSPVLR	AGMAMAGQSPVLR		No
10000176672	100067	Q7L014_872	Q7L014	Q7L014100067	ESQDVMQQ	872	E	S	Q	D	V	M	Q	Q	11	747.867	2	-30	1495.73	28.943	47.8	0.00098	SerTyr-VMQQATNAILR	VMQQATNAILR		No
10000176677	100067	Q92945_129	Q92945	Q92945100067	SQGDSISS	129	S	Q	G	D	S	I	S	S	14	579.294	3	-27	1737.88	26.51	35.5	0.00032	SerTyr-SISSQLGPIHPPPR	SISSQLGPIHPPPR		No
10000176678	100067	Q6PKG0_173	Q6PKG0	Q6PKG0100067	DFGDAINW	173	D	F	G	D	A	I	N	W	13	561.947	3	-13	1685.84	29.203	40.7	0.0023	SerTyr-AINWPTPGEIAHK	AINWPTPGEIAHK		No
10000176681	100067	Q12906_440	Q12906	Q12906100067	VEVDGNSF	440	V	E	V	D	G	N	S	F	11	665.788	2	-16	1331.58	20.407	33.4	0.00017	SerTyr-GNSFEASGPSK	GNSFEASGPSK		No
10000176682	100067	O95433_19	O95433	O95433100067	ERADATNV	19	E	R	A	D	A	T	N	V	12	593.252	3	-36	1779.76	26.879	33.8	0.00022	SerTyr-ATNVNNWHWTER	ATNVNNWHWTER		No
10000176683	100067	O94888_401	O94888	O94888100067	EKADGVVE	401	E	K	A	D	G	V	V	E	12	717.349	2	-26	1434.7	26.159	40.8	0.0034	SerTyr-GVVEGIDVNGPK	GVVEGIDVNGPK		No
10000176684	100067	Q9Y2X7_419	Q9Y2X7	Q9Y2X7100067	DLSDGAVT	419	D	L	S	D	G	A	V	T	13	581.313	3	-6.7	1743.94	30.778	37	0.001	SerTyr-GAVTLQEYLELKK	GAVTLQEYLELKK		No
10000176686	100067	P43243_681	P43243	P43243100067	DETDLANL	681	D	E	T	D	L	A	N	L	13	513.258	3	-17	1539.77	25.652	35.2	0.00073	SerTyr-LANLGDVASDGKK	LANLGDVASDGKK		No
10000176689	100067	P07814_930	P07814	P07814100067	DQVDIAVQ	930	D	Q	V	D	I	A	V	Q	10	702.895	2	-19	1405.79	35.186	40.6	0.012	SerTyr-IAVQELLQLK	IAVQELLQLK		No
10000176691	100067	P36915_344	P36915	P36915100067	QQTDSAME	344	Q	Q	T	D	S	A	M	E	12	777.34	2	-11	1554.68	21.508	38.3	0.0082	SerTyr-SAMEPTGPTQER	SAMEPTGPTQER		No
10000176693	100067	Q07666_76	Q07666	Q07666100067	TGPDATVG	76	T	G	P	D	A	T	V	G	21	728.054	3	-13	2184.16	28.592	35.5	0.003	SerTyr-ATVGGPAPTPLLPPSATASVK	ATVGGPAPTPLLPPSATASVK		No
10000176694	100067	O00499_302	O00499	O00499100067	SPPDGSPA	302	S	P	P	D	G	S	P	A	10	624.803	2	-18	1249.61	21.736	38.6	0.017	SerTyr-GSPAATPEIR	GSPAATPEIR		No
10000176696	100067	Q15459_504	Q15459	Q15459100067	VTWDGHSG	504	V	T	W	D	G	H	S	G	8	526.725	2	-15	1053.45	14.686	28.6	0.00034	SerTyr-GHSGSMAR	GHSGSMAR		No
10000176700	100067	Q15653_160	Q15653	Q15653100067	EAPDTYLA	160	E	A	P	D	T	Y	L	A	9	635.789	2	-28	1271.58	22.839	33.1	0.0052	SerTyr-TYLAQGPDR	TYLAQGPDR		No
10000176701	100067	P26368_129	P26368	P26368100067	MTPDGLAV	129	M	T	P	D	G	L	A	V	18	1030.54	2	-5.9	2061.08	29.695	33.5	0.0066	SerTyr-GLAVTPTPVPVVGSQMTR	GLAVTPTPVPVVGSQMTR		No
10000176712	100067	Q86UX7_345	Q86UX7	Q86UX7100067	DVLDSLTT	345	D	V	L	D	S	L	T	T	9	626.328	2	-28	1252.66	28.093	31.9	0.018	SerTyr-SLTTIPELK	SLTTIPELK		No
10000176713	100067	Q92785_116	Q92785	Q92785100067	ISQDGSSL	116	I	S	Q	D	G	S	S	L	9	598.308	2	-20	1196.62	31.753	28.7	0.0071	SerTyr-GSSLEALLR	GSSLEALLR		No
10000176716	100067	Q14566_275	Q14566	Q14566100067	SGVDGYET	275	S	G	V	D	G	Y	E	T	8	587.756	2	-28	1175.51	22.12	25.7	0.0053	SerTyr-GYETEGIR	GYETEGIR		No
10000176733	100077	P49006_64	P49006	P49006100077	ATGDAIEP	64	A	T	G	D	A	I	E	P	14	808.38	2	-27	1616.76	24.484	50.2	0.0031	SerTyr-AIEPAPPSQGAEAK	AIEPAPPSQGAEAK		No
10000176734	100077	P26368_129	P26368	P26368100077	MTPDGLAV	129	M	T	P	D	G	L	A	V	18	687.349	3	-25	2062.05	31.637	58.5	9.3e-07	SerTyr-GLAVTPTPVPVVGSQMTR	GLAVTPTPVPVVGSQMTR		No
10000176739	100077	P27816_152	P27816	P27816100077	DLADLVFP	152	D	L	A	D	L	V	F	P	22	843.736	3	-23	2531.21	36.719	44.1	0.00011	SerTyr-LVFPSSATADTSIFAGQNDPLK	LVFPSSATADTSIFAGQNDPLK		No
10000176741	100077	P27816_9	P27816	P27816100077	SLADALTE	9	S	L	A	D	A	L	T	E	14	874.912	2	-24	1749.82	29.893	42	0.0036	SerTyr-ALTEPSPDIEGEIK	ALTEPSPDIEGEIK		No
10000176742	100077	P27816_47	P27816	P27816100077	GKTDYIPL	47	G	K	T	D	Y	I	P	L	10	727.872	2	-2.5	1455.74	34.964	39.4	0.0072	SerTyr-YIPLLDVDEK	YIPLLDVDEK		No
10000176745	100077	P80723_166	P80723	P80723100077	TKSDGAPA	166	T	K	S	D	G	A	P	A	19	660.976	3	-1.4	1982.93	21.346	34.8	5.9e-05	SerTyr-GAPASDSKPGSSEAAPSSK	GAPASDSKPGSSEAAPSSK		No
10000176746	100077	P80723_172	P80723	P80723100077	PASDSKPG	172	P	A	S	D	S	K	P	G	13	494.91	3	5.4	1484.73	19.661	28.1	0.0047	SerTyr-SKPGSSEAAPSSK	SKPGSSEAAPSSK		No
10000176750	100077	P60709_245	P60709	P60709100077	ELPDGQVI	245	E	L	P	D	G	Q	V	I	10	668.83	2	-25	1337.66	26.323	37.8	0.0074	SerTyr-GQVITIGNER	GQVITIGNER	yes	No	TRUE
10000176779	100077	Q08211_97	Q08211	Q08211100077	DTPDTTAN	97	D	T	P	D	T	T	A	N	24	884.764	3	-21	2654.29	32.939	52.2	3.5e-08	SerTyr-TTANAEGDLPTTMGGPLPPHLALK	TTANAEGDLPTTMGGPLPPHLALK		No
10000176785	100077	Q9H6T3_452	Q9H6T3	Q9H6T3100077	DVPDSTTA	452	D	V	P	D	S	T	T	A	26	926.441	3	-31	2779.32	35.28	54.8	1.7e-06	SerTyr-STTAAAPENNPINLANVIAATGTTSK	STTAAAPENNPINLANVIAATGTTSK		No
10000176788	100077	O60664_10	O60664	O60664100077	AEADGSTQ	10	A	E	A	D	G	S	T	Q	19	769.032	3	-22	2307.1	27.57	59	1.4e-08	SerTyr-GSTQVTVEEPVQQPSVVDR	GSTQVTVEEPVQQPSVVDR		No
10000176789	100077	O60664_220	O60664	O60664100077	TSLDGFDV	220	T	S	L	D	G	F	D	V	11	742.829	2	-41	1485.66	27.659	41.8	3.2e-05	SerTyr-GFDVASVQQQR	GFDVASVQQQR		No
10000176792	100077	Q15459_33	Q15459	Q15459100077	SKEDSAPS	33	S	K	E	D	S	A	P	S	18	719.389	3	-11	2158.17	33.915	38.4	0.0015	SerTyr-SAPSKPVVGIIYPPPEVR	SAPSKPVVGIIYPPPEVR		No
10000176793	100077	P43243_764	P43243	P43243100077	ENADGQSD	764	E	N	A	D	G	Q	S	D	17	765.658	3	-3.4	2296.98	28.372	36.1	0.00052	SerTyr-GQSDENKDDYTIPDEYR	GQSDENKDDYTIPDEYR		No
10000176794	100077	P43243_681	P43243	P43243100077	DETDLANL	681	D	E	T	D	L	A	N	L	13	513.269	3	4.5	1539.81	31.666	37.1	0.00088	SerTyr-LANLGDVASDGKK	LANLGDVASDGKK		No
10000176797	100077	P09496_77	P09496	P09496100077	DAVDGVMN	77	D	A	V	D	G	V	M	N	26	1039.76	3	-27	3119.27	30.762	61.9	1.8e-09	SerTyr-GVM(Oxidation)NGEYYQESNGPTDSYAAISQVDR	GVMNGEYYQESNGPTDSYAAISQVDR		No
10000176798	100077	P09496_93	P09496	P09496100077	GPTDSYAA	93	G	P	T	D	S	Y	A	A	10	680.317	2	-21	1360.63	27.035	34.2	0.0071	SerTyr-SYAAISQVDR	SYAAISQVDR		No
10000176803	100077	Q9BTC0_1353	Q9BTC0	Q9BTC0100077	TAEDGVPA	1353	T	A	E	D	G	V	P	A	20	796.738	3	-25	2390.21	40.822	62	3.4e-07	SerTyr-GVPAPPLLDPIVQQFGQFSK	GVPAPPLLDPIVQQFGQFSK		No
10000176804	100077	Q9BTC0_1251	Q9BTC0	Q9BTC0100077	CSADAAVS	1251	C	S	A	D	A	A	V	S	24	865.113	3	-26	2595.34	33.131	35.4	0.00011	SerTyr-AAVSTTPPGSPPPPPPLPEPPVLK	AAVSTTPPGSPPPPPPLPEPPVLK		No
10000176815	100077	Q99615_9	Q99615	Q99615100077	AECDVVMA	9	A	E	C	D	V	V	M	A	17	703.662	3	-17	2110.98	31.788	63	7.2e-07	SerTyr-VVMAATEPELLDDQEAK	VVMAATEPELLDDQEAK		No
10000176817	100077	Q13435_777	Q13435	Q13435100077	EAMDGSET	777	E	A	M	D	G	S	E	T	14	898.436	2	-26	1796.87	32.894	43.5	0.0002	SerTyr-GSETPQLFTVLPEK	GSETPQLFTVLPEK		No
10000176829	100077	Q96I24_35	Q96I24	Q96I24100077	AKIDSIPH	35	A	K	I	D	S	I	P	H	23	912.442	3	-21	2737.33	34.045	50	1.4e-05	SerTyr-SIPHLNNSTPLVDPSVYGYGVQK	SIPHLNNSTPLVDPSVYGYGVQK		No
10000176830	100077	Q96I24_160	Q96I24	Q96I24100077	NDIDSNST	160	N	D	I	D	S	N	S	T	14	875.931	2	-38	1751.86	32.636	43	6.4e-05	SerTyr-SNSTIQEILIPASK	SNSTIQEILIPASK		No
10000176839	100077	P39880_1340	P39880	P39880100077	DSCDGVEA	1340	D	S	C	D	G	V	E	A	17	962.402	2	-26	1924.8	24.34	45.2	0.00013	SerTyr-GVEATEGPGSADTEEPK	GVEATEGPGSADTEEPK		No
10000176840	100077	Q9Y520_2190	Q9Y520	Q9Y520100077	SVTDYTTP	2190	S	V	T	D	Y	T	T	P	18	716.004	3	-14	2148.01	27.081	40.6	2.2e-05	SerTyr-YTTPSSSLPNTVATNNTK	YTTPSSSLPNTVATNNTK		No
10000176845	100077	Q9Y6W5_412	Q9Y6W5	Q9Y6W5100077	TGADGQPA	412	T	G	A	D	G	Q	P	A	16	633.009	3	3.5	1899.03	29.064	30.3	0.0027	SerTyr-GQPAIPPPLSDTTKPK	GQPAIPPPLSDTTKPK		No
10000176846	100077	O75369_1477	O75369	O75369100077	DNGDGTHT	1477	D	N	G	D	G	T	H	T	20	816.704	3	-17	2450.11	30.733	56.5	1.7e-05	SerTyr-GTHTVTYTPSQEGPYM(Oxidation)VSVK	GTHTVTYTPSQEGPYMVSVK		No
10000176847	100077	O75369_1022	O75369	O75369100077	VTYDGHPV	1022	V	T	Y	D	G	H	P	V	21	794.715	3	-13	2384.14	31.591	35.1	0.0015	SerTyr-GHPVPGSPYTVEASLPPDPSK	GHPVPGSPYTVEASLPPDPSK		No
10000176855	100077	Q14657_29	Q14657	Q14657100077	GGVDTAAA	29	G	G	V	D	T	A	A	A	19	625.314	3	-0.74	1875.94	23.543	31.4	0.0003	SerTyr-TAAAPAGGAPPAHAPGPGR	TAAAPAGGAPPAHAPGPGR		No
10000176858	100077	P52566_56	P52566	P52566100077	LLGDGPVV	56	L	L	G	D	G	P	V	V	8	531.775	2	-3.8	1063.55	22.756	25.6	0.011	SerTyr-GPVVTDPK	GPVVTDPK		No
10000176859	100077	P04233_23	P04233	P04233100077	DQRDLISN	23	D	Q	R	D	L	I	S	N	13	584.289	3	-14	1752.87	30.919	50.5	0.00017	SerTyr-LISNNEQLPM(Oxidation)LGR	LISNNEQLPMLGR		No
10000176867	100077	P50851_1785	P50851	P50851100077	PTVDSVSQ	1785	P	T	V	D	S	V	S	Q	15	633.952	3	-17	1901.86	28.583	46.4	4.1e-05	SerTyr-SVSQDPVSNMSITER	SVSQDPVSNMSITER		No
10000176873	100077	O60271_6	O60271	O60271100077	ELEDGVVY	6	E	L	E	D	G	V	V	Y	18	701.312	3	-14	2103.93	27.817	58.9	8.6e-09	SerTyr-GVVYQEEPGGSGAVMSER	GVVYQEEPGGSGAVMSER		No
10000176874	100077	P36915_344	P36915	P36915100077	QQTDSAME	344	Q	Q	T	D	S	A	M	E	12	785.329	2	-22	1570.66	21.886	46.3	8.6e-05	SerTyr-SAM(Oxidation)EPTGPTQER	SAMEPTGPTQER		No
10000176878	100077	Q6ZUJ8_149	Q6ZUJ8	Q6ZUJ8100077	SGCDSVTD	149	S	G	C	D	S	V	T	D	17	721.664	3	-8.7	2164.99	27.623	36.9	0.00022	SerTyr-SVTDTEPEDEKVVSYSK	SVTDTEPEDEKVVSYSK		No
10000176881	100077	Q53SF7_984	Q53SF7	Q53SF7100077	AERDMLPS	984	A	E	R	D	M	L	P	S	14	889.439	2	-18	1778.88	32.297	41.5	0.0012	SerTyr-MLPSPEQTLSPLSK	MLPSPEQTLSPLSK		No
10000176883	100077	Q7L014_872	Q7L014	Q7L014100077	ESQDVMQQ	872	E	S	Q	D	V	M	Q	Q	11	755.871	2	-22	1511.74	26.995	43	0.00025	SerTyr-VM(Oxidation)QQATNAILR	VMQQATNAILR		No
10000176885	100077	Q8NFC6_2045	Q8NFC6	Q8NFC6100077	EECDGLMA	2045	E	E	C	D	G	L	M	A	21	753.017	3	-17	2259.05	29.648	67.6	2.7e-08	SerTyr-GLMATTASGDITNQNSLAGGK	GLMATTASGDITNQNSLAGGK		No
10000176886	100077	P12270_2148	P12270	P12270100077	HRTDGFAE	2148	H	R	T	D	G	F	A	E	16	629.32	3	-5.7	1887.96	34.14	50.1	3e-08	SerTyr-GFAEAIHSPQVAGVPR	GFAEAIHSPQVAGVPR		No
10000176889	100077	P23025_6	P23025	P23025100077	AAADGALP	6	A	A	A	D	G	A	L	P	20	747.365	3	-34	2242.09	33.156	60	3.6e-08	SerTyr-GALPEAAALEQPAELPASVR	GALPEAAALEQPAELPASVR		No
10000176890	100077	Q92598_548	Q92598	Q92598100077	VQTDAQQT	548	V	Q	T	D	A	Q	Q	T	19	770.014	3	-14	2310.04	24.797	53.5	4.3e-08	SerTyr-AQQTSQSPPSPELTSEENK	AQQTSQSPPSPELTSEENK		No
10000176892	100077	Q6JBY9_273	Q6JBY9	Q6JBY9100077	EEVDGQHP	273	E	E	V	D	G	Q	H	P	23	908.747	3	5.0	2726.24	24.744	59	6e-08	SerTyr-GQHPAQEEVPESPQTSGPEAENR	GQHPAQEEVPESPQTSGPEAENR		No
10000176896	100077	Q7Z6Z7_3080	Q7Z6Z7	Q7Z6Z7100077	DMEDSVLA	3080	D	M	E	D	S	V	L	A	18	701.352	3	-26	2104.05	38.498	59.6	8.7e-08	SerTyr-SVLAVMPPDIAAEAQALR	SVLAVMPPDIAAEAQALR		No
10000176897	100077	P85037_81	P85037	P85037100077	VSGDSAVA	81	V	S	G	D	S	A	V	A	19	625.324	3	-30	1875.97	36.216	52	1e-07	SerTyr-SAVAGAAPALVAAAAASVR	SAVAGAAPALVAAAAASVR		No
10000176898	100077	Q92945_129	Q92945	Q92945100077	SQGDSISS	129	S	Q	G	D	S	I	S	S	14	579.312	3	4.5	1737.93	34.126	37	0.00016	SerTyr-SISSQLGPIHPPPR	SISSQLGPIHPPPR		No
10000176905	100077	P26599_173	P26599	P26599100077	AAVDAGMA	173	A	A	V	D	A	G	M	A	13	777.856	2	-24	1555.71	26.039	40.9	0.00037	SerTyr-AGM(Oxidation)AMAGQSPVLR	AGMAMAGQSPVLR		No
10000176908	100077	Q92900_76	Q92900	Q92900100077	GQLDAQVG	76	G	Q	L	D	A	Q	V	G	20	740.026	3	-16	2220.08	30.745	62.6	3e-07	SerTyr-AQVGPEGILQNGAVDDSVAK	AQVGPEGILQNGAVDDSVAK		No
10000176911	100077	Q13098_115	Q13098	Q13098100077	NAPDAIPE	115	N	A	P	D	A	I	P	E	21	820.388	3	-24	2461.16	35.933	60	3.1e-07	SerTyr-AIPESGVEPPALDTAWVEATR	AIPESGVEPPALDTAWVEATR		No
10000176918	100077	P53621_857	P53621	P53621100077	LDEDGFVE	857	L	D	E	D	G	F	V	E	16	914.913	2	-22	1829.83	33.385	50.2	3.7e-07	SerTyr-GFVEATEGLGDDALGK	GFVEATEGLGDDALGK		No
10000176920	100077	P55209_58	P55209	P55209100077	ERLDGLVE	58	E	R	L	D	G	L	V	E	15	627.979	3	-19	1883.94	33.876	52.5	4.4e-07	SerTyr-GLVETPTGYIESLPR	GLVETPTGYIESLPR		No
10000176921	100077	Q9ULH7_183	Q9ULH7	Q9ULH7100077	DSSDALSP	183	D	S	S	D	A	L	S	P	23	840.375	3	-17	2521.12	25.043	51.4	4.8e-07	SerTyr-ALSPDQPASQESQGSAASPSEPK	ALSPDQPASQESQGSAASPSEPK		No
10000176926	100077	Q02750_17	Q02750	Q02750100077	PAPDGSAV	17	P	A	P	D	G	S	A	V	19	709.671	3	-10	2129.01	28.556	54.8	8.8e-07	SerTyr-GSAVNGTSSAETNLEALQK	GSAVNGTSSAETNLEALQK		No
10000176929	100077	P49069_10	P49069	P49069100077	VATDGGER	10	V	A	T	D	G	G	E	R	18	644.99	3	2.4	1934.97	25.96	56.3	1.2e-06	SerTyr-GGERPGVPAGSGLSASQR	GGERPGVPAGSGLSASQR		No
10000176930	100077	P43007_13	P43007	P43007100077	GYLDSAQA	13	G	Y	L	D	S	A	Q	A	19	605.62	3	-19	1816.86	23.227	51.8	1.7e-06	SerTyr-SAQAGPAAGPGAPGTAAGR	SAQAGPAAGPGAPGTAAGR		No
10000176931	100077	Q9Y5A9_368	Q9Y5A9	Q9Y5A9100077	NGVDGNGV	368	N	G	V	D	G	N	G	V	24	857.399	3	-12	2572.2	25.48	50.2	1.7e-06	SerTyr-GNGVGQSQAGSGSTPSEPHPVLEK	GNGVGQSQAGSGSTPSEPHPVLEK		No
10000176932	100077	Q96T58_2860	Q96T58	Q96T58100077	VKPDSVTA	2860	V	K	P	D	S	V	T	A	10	626.302	2	-20	1252.6	21.641	36.8	0.00027	SerTyr-SVTASQPPSK	SVTASQPPSK		No
10000176933	100077	Q96T58_1575	Q96T58	Q96T58100077	STTDSIQE	1575	S	T	T	D	S	I	Q	E	12	554.637	3	19	1663.91	37.88	28.6	0.009	SerTyr-SIQEPVVLFHSR	SIQEPVVLFHSR		No
10000176935	100077	Q13541_26	Q13541	Q13541100077	VLGDGVQL	26	V	L	G	D	G	V	Q	L	26	938.765	3	-27	2816.3	33.402	52.2	1.9e-06	SerTyr-GVQLPPGDYSTTPGGTLFSTTPGGTR	GVQLPPGDYSTTPGGTLFSTTPGGTR		No
10000176936	100077	O75934_15	O75934	O75934100077	VVVDALPY	15	V	V	V	D	A	L	P	Y	15	644.962	3	-22	1934.88	33.371	51.2	2.1e-06	SerTyr-ALPYFDQGYEAPGVR	ALPYFDQGYEAPGVR		No
10000176939	100077	Q99733_9	Q99733	Q99733100077	SFSDGVPS	9	S	F	S	D	G	V	P	S	11	655.31	2	-11	1310.62	24.201	38	0.0038	SerTyr-GVPSDSVEAAK	GVPSDSVEAAK		No
10000176940	100077	Q8N684_30	Q8N684	Q8N684100077	DQIDLYDD	30	D	Q	I	D	L	Y	D	D	16	682.648	3	0.38	2047.95	31.805	49.7	2.9e-06	SerTyr-LYDDVLTATSQPSDDR	LYDDVLTATSQPSDDR		No
10000176943	100077	Q8N163_293	Q8N163	Q8N163100077	AAPDAGAE	293	A	A	P	D	A	G	A	E	17	965.419	2	-21	1930.84	25.731	48.6	3.8e-06	SerTyr-AGAEPITADSDPAYSSK	AGAEPITADSDPAYSSK		No
10000176944	100077	Q92541_181	Q92541	Q92541100077	EFHDGYGE	181	E	F	H	D	G	Y	G	E	13	868.319	2	-25	1736.64	28.34	41.5	4e-06	SerTyr-GYGEDLMGDEEDR	GYGEDLMGDEEDR		No
10000176951	100077	O43815_437	O43815	O43815100077	NEADSLTY	437	N	E	A	D	S	L	T	Y	10	694.819	2	-28	1389.64	27.607	41.8	0.017	SerTyr-SLTYDIANNK	SLTYDIANNK		No
10000176953	100077	O43865_74	O43865	O43865100077	SSTDSYSS	74	S	S	T	D	S	Y	S	S	19	758.67	3	29	2276.01	26.959	46.4	6.8e-06	SerTyr-SYSSAASYTDSSDDEVSPR	SYSSAASYTDSSDDEVSPR		No
10000176954	100077	P33992_14	P33992	P33992100077	FYSDSFGG	14	F	Y	S	D	S	F	G	G	14	553.566	3	-13	1660.7	24.567	53	7e-06	SerTyr-SFGGDAQADEGQAR	SFGGDAQADEGQAR		No
10000176960	100077	Q12888_1479	Q12888	Q12888100077	DGLDASSP	1479	D	G	L	D	A	S	S	P	12	721.342	2	-22	1442.68	27.642	44.2	0.018	SerTyr-ASSPGNSFVGLR	ASSPGNSFVGLR		No
10000176962	100077	Q71RC2_574	Q71RC2	Q71RC2100077	VQKDGLNQ	574	V	Q	K	D	G	L	N	Q	19	744.388	3	-7.9	2233.16	29.414	47.8	1.5e-05	SerTyr-GLNQTTIPVSPPSTTKPSR	GLNQTTIPVSPPSTTKPSR		No
10000176967	100077	Q8NCG7_549	Q8NCG7	Q8NCG7100077	TELDGGDQ	549	T	E	L	D	G	G	D	Q	20	802.064	3	-23	2406.19	35.043	54.4	1.7e-05	SerTyr-GGDQEVLTQPLLGEQSLLTR	GGDQEVLTQPLLGEQSLLTR		No
10000176968	100077	Q13263_686	Q13263	Q13263100077	LSLDGADS	686	L	S	L	D	G	A	D	S	10	577.782	2	-10	1155.56	21.414	32.1	0.0033	SerTyr-GADSTGVVAK	GADSTGVVAK		No
10000176970	100077	Q13428_1102	Q13428	Q13428100077	SGVDSAVG	1102	S	G	V	D	S	A	V	G	19	694.006	3	-25	2082.02	26.224	52.2	2e-05	SerTyr-SAVGTLPATSPQSTSVQAK	SAVGTLPATSPQSTSVQAK		No
10000176975	100077	Q8N1G4_526	Q8N1G4	Q8N1G4100077	TEADAVSG	526	T	E	A	D	A	V	S	G	17	630.638	3	-13	1891.91	26.576	56.9	2.4e-05	SerTyr-AVSGQLPDPTTNPSAGK	AVSGQLPDPTTNPSAGK		No
10000176977	100077	Q86V81_94	Q86V81	Q86V81100077	DLFDSGFG	94	D	L	F	D	S	G	F	G	14	715.855	2	34	1431.71	24.364	51.9	2.4e-05	SerTyr-SGFGGGAGVETGGK	SGFGGGAGVETGGK		No
10000176980	100077	Q9Y3A3_35	Q9Y3A3	Q9Y3A3100077	DEMDSTLA	35	D	E	M	D	S	T	L	A	14	637.992	3	-16	1913.98	35.21	50.8	3.5e-05	SerTyr-STLAVQQYIQQNIR	STLAVQQYIQQNIR		No
10000176983	100077	Q1KMD3_127	Q1KMD3	Q1KMD3100077	AEPDASEK	127	A	E	P	D	A	S	E	K	25	851.063	3	-6.8	2553.19	24.444	49	4.1e-05	SerTyr-ASEKPAEATAGSGGVNGGEEQGLGK	ASEKPAEATAGSGGVNGGEEQGLGK		No
10000176986	100077	Q9GZR7_297	Q9GZR7	Q9GZR7100077	AESDALPD	297	A	E	S	D	A	L	P	D	22	845.058	3	-28	2535.17	35.218	57.8	4.5e-05	SerTyr-ALPDDTVIESEALPSDIAAEAR	ALPDDTVIESEALPSDIAAEAR		No
10000176987	100077	Q96QC0_377	Q96QC0	Q96QC0100077	GALDAKPV	377	G	A	L	D	A	K	P	V	15	620.313	3	-2.7	1860.94	24.883	48.1	4.5e-05	SerTyr-AKPVESPGDPNQLTR	AKPVESPGDPNQLTR		No
10000176990	100077	Q92619_40	Q92619	Q92619100077	DGADAVFP	40	D	G	A	D	A	V	F	P	18	973.976	2	-21	1947.95	30.992	39.5	4.3e-05	SerTyr-AVFPGPSLEPPAGSSGVK	AVFPGPSLEPPAGSSGVK		No
10000176993	100077	Q5SNT6_1047	Q5SNT6	Q5SNT6100077	DSGDIFST	1047	D	S	G	D	I	F	S	T	13	809.871	2	-22	1619.74	26.525	41.1	6.2e-05	SerTyr-IFSTGTGSQSVER	IFSTGTGSQSVER	yes	No
10000177001	100077	P56962_202	P56962	P56962100077	EKIDSIAD	202	E	K	I	D	S	I	A	D	18	697.668	3	-4.9	2093	32.326	45.3	7.7e-05	SerTyr-SIADHVNSAAVNVEEGTK	SIADHVNSAAVNVEEGTK		No
10000177002	100077	Q92925_211	Q92925	Q92925100077	AEGDSAGT	211	A	E	G	D	S	A	G	T	16	797.857	2	-17	1595.71	21.292	45.2	7.8e-05	SerTyr-SAGTAGTPGGTPAGDK	SAGTAGTPGGTPAGDK		No
10000177005	100077	P33991_133	P33991	P33991100077	LQSDGAAA	133	L	Q	S	D	G	A	A	A	17	641.973	3	-13	1925.92	31.009	57.2	9.4e-05	SerTyr-GAAAEDIVASEQSLGQK	GAAAEDIVASEQSLGQK		No
10000177010	100077	P24534_103	P24534	P24534100077	DDIDLFGS	103	D	D	I	D	L	F	G	S	14	917.855	2	-26	1835.71	27.43	38.4	6.1e-05	SerTyr-LFGSDDEEESEEAK	LFGSDDEEESEEAK		No
10000177012	100077	Q02447_531	Q02447	Q02447100077	NSIDSAGI	531	N	S	I	D	S	A	G	I	19	733.351	3	-3.9	2200.05	29.696	40.2	0.00013	SerTyr-SAGIQLHPGENADSPADIR	SAGIQLHPGENADSPADIR		No
10000177013	100077	P00519_940	P00519	P00519100077	SLVDAVNS	940	S	L	V	D	A	V	N	S	17	640.318	3	-6.3	1920.95	24.133	40.8	0.00013	SerTyr-AVNSDAAKPSQPGEGLK	AVNSDAAKPSQPGEGLK		No
10000177014	100077	Q13367_844	Q13367	Q13367100077	TLTDSTLV	844	T	L	T	D	S	T	L	V	16	606.994	3	-15	1820.98	35.136	44.2	0.00014	SerTyr-STLVPSLLSPVSGVGR	STLVPSLLSPVSGVGR		No
10000177019	100077	P42331_405	P42331	P42331100077	SDSDTTSP	405	S	D	S	D	T	T	S	P	19	743.985	3	-17	2231.96	25.838	44.6	0.00016	SerTyr-TTSPTGQQPSDAFPEDSSK	TTSPTGQQPSDAFPEDSSK		No
10000177020	100077	Q14498_332	Q14498	Q14498100077	ERTDASSA	332	E	R	T	D	A	S	S	A	15	932.392	2	-25	1864.78	32.146	40.1	0.00016	SerTyr-ASSASSFLDSDELER	ASSASSFLDSDELER		No
10000177021	100077	Q13620_44	Q13620	Q13620100077	SATDGNTS	44	S	A	T	D	G	N	T	S	12	706.32	2	-27	1412.64	20.383	37.4	5.7e-05	SerTyr-GNTSTTPPTSAK	GNTSTTPPTSAK		No
10000177022	100077	Q8IXQ4_89	Q8IXQ4	Q8IXQ4100077	DDDDGFFG	89	D	D	D	D	G	F	F	G	12	742.868	2	-19	1485.74	35.651	46.1	0.00017	SerTyr-GFFGPALPPGFK	GFFGPALPPGFK		No
10000177023	100077	Q9P1Y5_862	Q9P1Y5	Q9P1Y5100077	DEGDGSPA	862	D	E	G	D	G	S	P	A	21	785.318	3	-21	2355.95	29.278	41.6	0.00018	SerTyr-GSPAGAEDSLEEEASSEGEPR	GSPAGAEDSLEEEASSEGEPR		No
10000177030	100077	P54578_228	P54578	P54578100077	KETDSSSA	228	K	E	T	D	S	S	S	A	11	622.282	2	-18	1244.56	19.406	39.6	0.00018	SerTyr-SSSASAATPSK	SSSASAATPSK		No
10000177031	100077	O75367_173	O75367	O75367100077	ASADSTTE	173	A	S	A	D	S	T	T	E	17	981.449	2	-21	1962.9	29.542	36.8	5.4e-05	SerTyr-STTEGTPADGFTVLSTK	STTEGTPADGFTVLSTK		No
10000177032	100077	O60244_995	O60244	O60244100077	DMMDSLIS	995	D	M	M	D	S	L	I	S	17	728.373	3	-21	2185.12	33.279	48.5	0.00023	SerTyr-SLISQLQPPPQQQPFPK	SLISQLQPPPQQQPFPK		No
10000177033	100077	Q96P70_964	Q96P70	Q96P70100077	EEEDGLAG	964	E	E	E	D	G	L	A	G	15	579.649	3	-6.4	1738.95	44.238	43.4	0.00023	SerTyr-GLAGQLLSDILATSK	GLAGQLLSDILATSK		No
10000177037	100077	P06396_640	P06396	P06396100077	SEPDGFWE	640	S	E	P	D	G	F	W	E	9	607.78	2	-25	1215.56	34.944	28.1	0.0052	SerTyr-GFWEALGGK	GFWEALGGK		No
10000177039	100077	P08047_200	P08047	P08047100077	VQQDGSGQ	200	V	Q	Q	D	G	S	G	Q	19	753.386	3	-20	2260.16	31.286	53.8	0.00027	SerTyr-GSGQIQIIPGANQQIITNR	GSGQIQIIPGANQQIITNR		No
10000177044	100077	Q96PN7_761	Q96PN7	Q96PN7100077	NSIDGSNV	761	N	S	I	D	G	S	N	V	20	763.678	3	-35	2291.03	27.8	32.8	1.6e-05	SerTyr-GSNVTVTPGPGEQTVDVEPR	GSNVTVTPGPGEQTVDVEPR		No
10000177045	100077	P41250_57	P41250	P41250100077	SSMDGAGA	57	S	S	M	D	G	A	G	A	12	716.855	2	-28	1433.71	30.292	42.1	0.00036	SerTyr-GAGAEEVLAPLR	GAGAEEVLAPLR		No
10000177046	100077	Q8IZ21_21	Q8IZ21	Q8IZ21100077	MVLDSVEA	21	M	V	L	D	S	V	E	A	12	726.826	2	-28	1453.65	22.983	41	0.00043	SerTyr-SVEAGDTTPPTK	SVEAGDTTPPTK		No
10000177047	100077	Q8IX01_902	Q8IX01	Q8IX01100077	DDEDGGEE	902	D	D	E	D	G	G	E	E	13	674.298	2	-21	1348.6	21.049	39.3	0.00032	SerTyr-GGEEAPAPGGAGK	GGEEAPAPGGAGK		No
10000177048	100077	Q9Y2X7_633	Q9Y2X7	Q9Y2X7100077	ESLDGDLD	633	E	S	L	D	G	D	L	D	16	959.967	2	-20	1919.93	33.033	40	0.00049	SerTyr-GDLDPGLPSTEDVILK	GDLDPGLPSTEDVILK		No
10000177049	100077	Q96PK2_2229	Q96PK2	Q96PK2100077	DTTDGYMG	2229	D	T	T	D	G	Y	M	G	14	605.962	3	7.3	1817.89	25.738	35.8	9.2e-05	SerTyr-GYM(Oxidation)GVNQAPEKLDK	GYMGVNQAPEKLDK	yes	No
10000177051	100077	Q07666_76	Q07666	Q07666100077	TGPDATVG	76	T	G	P	D	A	T	V	G	21	728.038	3	-34	2184.12	30.255	38.2	0.00027	SerTyr-ATVGGPAPTPLLPPSATASVK	ATVGGPAPTPLLPPSATASVK		No
10000177052	100077	Q6ZRS2_2276	Q6ZRS2	Q6ZRS2100077	NENDGFPA	2276	N	E	N	D	G	F	P	A	22	848.679	3	-14	2546.04	26.789	33.8	4.8e-05	SerTyr-GFPAGEGEEAGRPGAEDEEM(Oxidation)SR	GFPAGEGEEAGRPGAEDEEMSR		No
10000177055	100077	Q96PU8_75	Q96PU8	Q96PU8100077	ELPDAVGP	75	E	L	P	D	A	V	G	P	11	716.377	2	-27	1432.75	29.089	45.7	0.00075	SerTyr-AVGPIVQLQEK	AVGPIVQLQEK		No
10000177057	100077	O94921_57	O94921	O94921100077	QGMDSVIK	57	Q	G	M	D	S	V	I	K	13	568.973	3	-1.0	1706.92	31.24	38.4	0.0004	SerTyr-SVIKPLDTIPEDK	SVIKPLDTIPEDK		No
10000177060	100077	O94888_401	O94888	O94888100077	EKADGVVE	401	E	K	A	D	G	V	V	E	12	717.347	2	-28	1434.69	27.747	46.1	0.00083	SerTyr-GVVEGIDVNGPK	GVVEGIDVNGPK		No
10000177063	100077	P21333_1049	P21333	P21333100077	VTYDGVPV	1049	V	T	Y	D	G	V	P	V	21	775.748	3	-8.0	2327.24	34.467	34.7	9.3e-05	SerTyr-GVPVPGSPFPLEAVAPTKPSK	GVPVPGSPFPLEAVAPTKPSK		No
10000177066	100077	O95433_19	O95433	O95433100077	ERADATNV	19	E	R	A	D	A	T	N	V	12	593.276	3	5.5	1779.83	38.913	30.6	0.0015	SerTyr-ATNVNNWHWTER	ATNVNNWHWTER		No
10000177067	100077	O95433_255	O95433	O95433100077	HMVDGNVS	255	H	M	V	D	G	N	V	S	14	871.412	2	-6.9	1742.82	31.76	31.8	0.014	SerTyr-GNVSGEFTDLVPEK	GNVSGEFTDLVPEK		No
10000177074	100077	P98171_404	P98171	P98171100077	DVLDSFQT	404	D	V	L	D	S	F	Q	T	12	781.354	2	-24	1562.71	26.281	43.6	0.0018	SerTyr-SFQTSPSTESLK	SFQTSPSTESLK		No
10000177076	100077	O00499_302	O00499	O00499100077	SPPDGSPA	302	S	P	P	D	G	S	P	A	10	624.796	2	-29	1249.59	23.636	41.9	0.0021	SerTyr-GSPAATPEIR	GSPAATPEIR		No
10000177078	100077	P07814_930	P07814	P07814100077	DQVDIAVQ	930	D	Q	V	D	I	A	V	Q	10	702.899	2	-14	1405.8	42.091	43.8	0.0026	SerTyr-IAVQELLQLK	IAVQELLQLK		No
10000177079	100077	O43379_1302	O43379	O43379100077	SACDGLLQ	1302	S	A	C	D	G	L	L	Q	32	877.187	4	-28	3508.75	37.469	36	0.00048	SerTyr-GLLQPPVDTQPGVTVPAVSFPAPSPVEESALR	GLLQPPVDTQPGVTVPAVSFPAPSPVEESALR		No
10000177080	100077	Q9P1Z2_135	Q9P1Z2	Q9P1Z2100077	EEADGGSD	135	E	E	A	D	G	G	S	D	11	674.359	2	-30	1348.72	31.882	35.2	0.00035	SerTyr-GGSDILLVVPK	GGSDILLVVPK		No
10000177088	100077	Q12912_182	Q12912	Q12912100077	ASGDSVVS	182	A	S	G	D	S	V	V	S	12	738.896	2	-31	1477.79	29.212	45.1	0.0033	SerTyr-SVVSPLPVTTVK	SVVSPLPVTTVK		No
10000177091	100077	P31146_395	P31146	P31146100077	SLKDGYVP	395	S	L	K	D	G	Y	V	P	6	455.73	2	-16	911.46	21.943	17.2	0.011	SerTyr-GYVPPK	GYVPPK		No
10000177094	100077	Q6PKG0_173	Q6PKG0	Q6PKG0100077	DFGDAINW	173	D	F	G	D	A	I	N	W	13	561.952	3	-3.7	1685.86	35.102	43	0.0041	SerTyr-AINWPTPGEIAHK	AINWPTPGEIAHK		No
10000177097	100077	Q86TI2_14	Q86TI2	Q86TI2100077	DRGDAAAT	14	D	R	G	D	A	A	A	T	10	604.765	2	-26	1209.53	20.927	38.5	0.0033	SerTyr-AAATDDPAAR	AAATDDPAAR		No
10000177098	100077	O15164_785	O15164	O15164100077	DAPDSTGD	785	D	A	P	D	S	T	G	D	17	664.622	3	-8.4	1993.87	21.222	31.6	0.00017	SerTyr-STGDQPGLHQDNSSNGK	STGDQPGLHQDNSSNGK		No
10000177100	100077	O94973_691	O94973	O94973100077	VFSDSASV	691	V	F	S	D	S	A	S	V	18	679.991	3	-15	2039.97	30.134	46.9	0.0065	SerTyr-SASVVAPLAPGSEDNFAR	SASVVAPLAPGSEDNFAR		No
10000177102	100077	Q9UPN9_830	Q9UPN9	Q9UPN9100077	SELDALAS	830	S	E	L	D	A	L	A	S	10	444.574	3	8.2	1333.72	33.637	35.5	0.001	SerTyr-ALASLENHVK	ALASLENHVK		No
10000177105	100077	Q6IN85_693	Q6IN85	Q6IN85100077	DMEDGEAV	693	D	M	E	D	G	E	A	V	10	619.788	2	-18	1239.58	22.496	37.6	0.0027	SerTyr-GEAVVSPSDK	GEAVVSPSDK		No
10000177106	100077	Q14151_821	Q14151	Q14151100077	DSRDGWGG	821	D	S	R	D	G	W	G	G	9	588.749	2	-4.1	1177.5	26.072	34.9	0.00086	SerTyr-GWGGYGSDK	GWGGYGSDK	yes	No
10000177108	100077	O15042_738	O15042	O15042100077	DDLDGVPL	738	D	D	L	D	G	V	P	L	12	503.925	3	10	1511.77	24.761	37	0.0024	SerTyr-GVPLDATEDSKK	GVPLDATEDSKK		No
10000177111	100077	Q9NZ52_518	Q9NZ52	Q9NZ52100077	HHLDALDQ	518	H	H	L	D	A	L	D	Q	10	690.341	2	-21	1380.68	34.108	42.8	0.011	SerTyr-ALDQLLEEAK	ALDQLLEEAK		No
10000177112	100077	Q15653_160	Q15653	Q15653100077	EAPDTYLA	160	E	A	P	D	T	Y	L	A	9	635.769	2	-59	1271.54	24.625	34.2	0.001	SerTyr-TYLAQGPDR	TYLAQGPDR		No
10000177114	100077	O75376_386	O75376	O75376100077	EIIDGLSE	386	E	I	I	D	G	L	S	E	10	699.303	2	-13	1398.61	21.58	46.6	0.013	SerTyr-GLSEQENNEK	GLSEQENNEK		No
10000177120	100077	Q9BQ87_163	Q9BQ87	Q9BQ87100077	MEIDGDVE	163	M	E	I	D	G	D	V	E	9	609.795	2	-14	1219.59	24.322	35.8	0.0026	SerTyr-GDVEIPPNK	GDVEIPPNK	yes	No
10000177122	100077	A6NMY6_17	A6NMY6	A6NMY6100077	LEGDHSTP	17	L	E	G	D	H	S	T	P	12	494.247	3	13	1482.74	26.307	32.5	0.00063	SerTyr-HSTPPSAYGSVK	HSTPPSAYGSVK	yes	No
10000177126	100077	O95391_8	O95391	O95391100077	TVVDAVNA	8	T	V	V	D	A	V	N	A	11	632.821	2	-14	1265.64	23.851	36.7	0.005	SerTyr-AVNAAPLSGSK	AVNAAPLSGSK		No
10000177130	100077	Q8NEZ4_2189	Q8NEZ4	Q8NEZ4100077	TQTDLFVT	2189	T	Q	T	D	L	F	V	T	10	712.866	2	-20	1425.73	29.578	38.6	0.015	SerTyr-LFVTPVTNQR	LFVTPVTNQR		No
10000177134	100077	Q14C86_1103	Q14C86	Q14C86100077	DLPDSASQ	1103	D	L	P	D	S	A	S	Q	16	658.305	3	11	1974.91	26.578	31.1	0.00074	SerTyr-SASQAAHPQDSAFSYR	SASQAAHPQDSAFSYR		No
10000177137	100077	Q8TAQ2_815	Q8TAQ2	Q8TAQ2100077	EKSDGDPI	815	E	K	S	D	G	D	P	I	11	492.91	3	-4.2	1478.73	24.988	29.6	0.00043	SerTyr-GDPIVDPEKEK	GDPIVDPEKEK		No
10000177141	100077	P45974_783	P45974	P45974100077	SAADSISE	783	S	A	A	D	S	I	S	E	11	675.301	2	-74	1350.6	26.648	33	0.0023	SerTyr-SISESVPVGPK	SISESVPVGPK		No
10000177146	100077	A7XYQ1_299	A7XYQ1	A7XYQ1100077	LTPDSWNI	299	L	T	P	D	S	W	N	I	10	711.835	2	-27	1423.67	32.528	34.5	0.0051	SerTyr-SWNIPLTDAR	SWNIPLTDAR		No
10000177161	100077	Q00653_11	Q00653	Q00653100077	PGLDGIIE	11	P	G	L	D	G	I	I	E	9	675.301	2	-23	1350.6	31.163	34.6	0.011	SerTyr-GIIEYDDFK	GIIEYDDFK		No
10000177162	100077	Q8WUI4_413	Q8WUI4	Q8WUI4100077	LETDGGGP	413	L	E	T	D	G	G	G	P	15	581.605	3	-4.9	1744.82	28.063	29.9	0.0016	SerTyr-GGGPGQVVDDGLEHR	GGGPGQVVDDGLEHR		No
10000177168	100077	Q06413_106	Q06413	Q06413100077	DADDSVGH	106	D	A	D	D	S	V	G	H	11	474.549	3	9.8	1423.65	21.088	27.8	0.001	SerTyr-SVGHSPESEDK	SVGHSPESEDK		No
10000177169	100077	Q9BY77_235	Q9BY77	Q9BY77100077	VQNDAYTA	235	V	Q	N	D	A	Y	T	A	12	748.871	2	-26	1497.74	29.334	32.1	0.0064	SerTyr-AYTAPALPSSIR	AYTAPALPSSIR		No
10000177170	100077	P51991_116	P51991	P51991100077	SREDSVKP	116	S	R	E	D	S	V	K	P	11	462.933	3	7.9	1388.8	42.897	30.6	0.004	SerTyr-SVKPGAHLTVK	SVKPGAHLTVK		No
10000177179	100077	Q8IWJ2_8	Q8IWJ2	Q8IWJ2100077	LVQDGVAS	8	L	V	Q	D	G	V	A	S	12	646.816	2	-19	1293.63	22.739	31.9	0.011	SerTyr-GVASPATPGTGK	GVASPATPGTGK		No
10000177181	100077	Q8WV28_178	Q8WV28	Q8WV28100077	DEADYVVP	178	D	E	A	D	Y	V	V	P	25	1031.45	3	-20	3094.35	30.467	27.1	0.0014	SerTyr-YVVPVEDNDENYIHPTESSSPPPEK	YVVPVEDNDENYIHPTESSSPPPEK		No
10000177183	100077	P35579_1154	P35579	P35579100077	DTLDSTAA	1154	D	T	L	D	S	T	A	A	9	627.301	2	-13	1254.6	24.184	32.1	0.013	SerTyr-STAAQQELR	STAAQQELR		No
10000177187	100077	O75427_359	O75427	O75427100077	DFIDSHVP	359	D	F	I	D	S	H	V	P	10	468.877	3	9.1	1406.63	22.902	28.7	0.0042	SerTyr-SHVPGEDEER	SHVPGEDEER		No
10000177188	100077	P31943_252	P31943	P31943100077	GYNDGYGF	252	G	Y	N	D	G	Y	G	F	8	554.733	2	-10	1109.47	24.753	28.1	0.0034	SerTyr-GYGFGSDR	GYGFGSDR	yes	No
10000177192	100077	Q92785_116	Q92785	Q92785100077	ISQDGSSL	116	I	S	Q	D	G	S	S	L	9	598.307	2	-22	1196.61	34.349	27.8	0.0033	SerTyr-GSSLEALLR	GSSLEALLR		No
10000177195	100077	Q99986_232	Q99986	Q99986100077	TSIDAHNG	232	T	S	I	D	A	H	N	G	9	386.87	3	25	1160.61	21.35	27.6	0.0034	SerTyr-AHNGVAPSR	AHNGVAPSR		No
10000177197	100077	O60508_205	O60508	O60508100077	DEKDVAKP	205	D	E	K	D	V	A	K	P	10	465.569	3	9.8	1396.71	20.467	31.3	0.019	SerTyr-VAKPSEEEQK	VAKPSEEEQK		No
10000177202	100077	Q14566_275	Q14566	Q14566100077	SGVDGYET	275	S	G	V	D	G	Y	E	T	8	587.726	2	-80	1175.45	24.122	24.3	0.0013	SerTyr-GYETEGIR	GYETEGIR		No
10000177204	100077	Q92804_141	Q92804	Q92804100077	QQHDSYSQ	141	Q	Q	H	D	S	Y	S	Q	13	621.615	3	13	1864.84	24.241	24.6	0.0015	SerTyr-SYSQNQQSYHSQR	SYSQNQQSYHSQR		No
10000177205	100077	P35251_168	P35251	P35251100077	SVLDYFGT	168	S	V	L	D	Y	F	G	T	9	632.776	2	-40	1265.55	26.063	29.9	0.015	SerTyr-YFGTGSVQR	YFGTGSVQR		No
10000177208	100077	Q6ZVM7_158	Q6ZVM7	Q6ZVM7100077	ADLDALSP	158	A	D	L	D	A	L	S	P	10	457.248	3	5.4	1371.74	28.865	29.8	0.017	SerTyr-ALSPIHTPQR	ALSPIHTPQR		No
10000177212	100077	P09234_11	P09234	P09234100077	DYCDTYLT	11	D	Y	C	D	T	Y	L	T	11	509.253	3	11	1527.76	27.543	22.1	0.00094	SerTyr-TYLTHDSPSVR	TYLTHDSPSVR		No
10000177213	100077	Q99459_392	Q99459	Q99459100077	HESDFSGV	392	H	E	S	D	F	S	G	V	8	571.268	2	-30	1142.54	25.215	28.6	0.015	SerTyr-FSGVTPQR	FSGVTPQR		No
10000177214	100077	Q12906_440	Q12906	Q12906100077	VEVDGNSF	440	V	E	V	D	G	N	S	F	12	486.901	3	2.1	1460.7	24.346	24.2	0.0025	SerTyr-GNSFEASGPSKK	GNSFEASGPSKK		No
10000177219	100077	Q3LXA3_363	Q3LXA3	Q3LXA3100077	EAPDSTAA	363	E	A	P	D	S	T	A	A	10	543.749	2	-14	1087.5	16.391	27.8	0.018	SerTyr-STAAGGSASK	STAAGGSASK		No
10000177226	100077	O43665_15	O43665	O43665100077	HDSDGSSS	15	H	D	S	D	G	S	S	S	11	452.218	3	11	1356.65	20.926	23.7	0.0073	SerTyr-GSSSSSHQSLK	GSSSSSHQSLK		No
10000177227	100077	Q9Y5K8_118	Q9Y5K8	Q9Y5K8100077	EGTDSYEL	118	E	G	T	D	S	Y	E	L	9	630.303	2	-22	1260.61	29.106	25.5	0.016	SerTyr-SYELTGLAR	SYELTGLAR		No
10000177228	100077	Q9Y2X3_125	Q9Y2X3	Q9Y2X3100077	SQMDGLIP	125	S	Q	M	D	G	L	I	P	9	594.318	2	-10	1188.64	28.861	25.8	0.019	SerTyr-GLIPGVEPR	GLIPGVEPR		No
10000177232	100077	Q92917_99	Q92917	Q92917100077	ALADGVVS	99	A	L	A	D	G	V	V	S	8	519.259	2	-50	1038.52	21.338	25.1	0.017	SerTyr-GVVSQAVK	GVVSQAVK		No
10000177237	100077	Q9H098_6	Q9H098	Q9H098100077	AEPDYIED	6	A	E	P	D	Y	I	E	D	14	660.654	3	-11	1981.96	31.544	23.6	0.014	SerTyr-YIEDDNPELIRPQK	YIEDDNPELIRPQK		No
10000177238	100077	Q14204_4368	Q14204	Q14204100077	TRTDSTSD	4368	T	R	T	D	S	T	S	D	11	510.569	3	8.7	1531.71	28.287	24.2	0.019	SerTyr-STSDGRPAWM(Oxidation)R	STSDGRPAWMR		No
10000177239	100077	P20810_349	P20810	P20810100077	TDKDGKPL	349	T	D	K	D	G	K	P	L	15	492.02	4	-12	1968.08	20.38	23.1	0.014	SerTyr-GKPLLPEPEEKPKPR	GKPLLPEPEEKPKPR		No
10000177245	200077	P26599_173	P26599	P26599200077	AAVDAGMA	173	A	A	V	D	A	G	M	A	13	769.907	2	40	1539.81	25.442	39.1	8.4e-06	SerTyr-AGMAMAGQSPVLR	AGMAMAGQSPVLR		No
10000177249	200077	Q8N1G4_526	Q8N1G4	Q8N1G4200077	TEADAVSG	526	T	E	A	D	A	V	S	G	17	945.479	2	14	1890.96	23.652	46.5	2.6e-05	SerTyr-AVSGQLPDPTTNPSAGK	AVSGQLPDPTTNPSAGK		No
10000177255	200077	P55209_58	P55209	P55209200077	ERLDGLVE	58	E	R	L	D	G	L	V	E	15	941.463	2	-22	1882.93	34.028	54.8	0.00023	SerTyr-GLVETPTGYIESLPR	GLVETPTGYIESLPR		No
10000177256	200077	Q7L014_872	Q7L014	Q7L014200077	ESQDVMQQ	872	E	S	Q	D	V	M	Q	Q	11	747.922	2	43	1495.84	27.598	50.1	0.00039	SerTyr-VMQQATNAILR	VMQQATNAILR		No
10000177257	200077	O60664_220	O60664	O60664200077	TSLDGFDV	220	T	S	L	D	G	F	D	V	11	742.856	2	-5.3	1485.71	26.309	34.2	6.1e-05	SerTyr-GFDVASVQQQR	GFDVASVQQQR		No
10000177258	200077	P50851_1785	P50851	P50851200077	PTVDSVSQ	1785	P	T	V	D	S	V	S	Q	15	950.484	2	45	1900.97	26.003	50.1	0.00097	SerTyr-SVSQDPVSNMSITER	SVSQDPVSNMSITER		No
10000177260	200077	P63027_69	P63027	P63027200077	DRADALQA	69	D	R	A	D	A	L	Q	A	15	865.463	2	47	1730.93	24.841	49.4	0.0021	SerTyr-ALQAGASQFETSAAK	ALQAGASQFETSAAK	yes	No
10000177262	200077	P33991_133	P33991	P33991200077	LQSDGAAA	133	L	Q	S	D	G	A	A	A	17	641.984	3	3.7	1925.95	30.468	37.5	0.00085	SerTyr-GAAAEDIVASEQSLGQK	GAAAEDIVASEQSLGQK		No
10000177265	200077	Q12906_440	Q12906	Q12906200077	VEVDGNSF	440	V	E	V	D	G	N	S	F	11	665.795	2	-6.9	1331.59	19.52	30.4	4.8e-05	SerTyr-GNSFEASGPSK	GNSFEASGPSK		No
10000177266	200077	O75367_173	O75367	O75367200077	ASADSTTE	173	A	S	A	D	S	T	T	E	17	981.482	2	12	1962.96	27.264	33.9	0.00025	SerTyr-STTEGTPADGFTVLSTK	STTEGTPADGFTVLSTK		No
10000177270	200077	P80723_166	P80723	P80723200077	TKSDGAPA	166	T	K	S	D	G	A	P	A	19	660.974	3	-4.2	1982.92	13.835	33	0.00028	SerTyr-GAPASDSKPGSSEAAPSSK	GAPASDSKPGSSEAAPSSK		No
10000177284	200077	P12270_2148	P12270	P12270200077	HRTDGFAE	2148	H	R	T	D	G	F	A	E	16	629.329	3	8.8	1887.99	29.014	27.4	0.00031	SerTyr-GFAEAIHSPQVAGVPR	GFAEAIHSPQVAGVPR		No
10000177285	200077	P41250_57	P41250	P41250200077	SSMDGAGA	57	S	S	M	D	G	A	G	A	12	716.908	2	46	1433.82	27.419	31.1	0.002	SerTyr-GAGAEEVLAPLR	GAGAEEVLAPLR		No
10000177286	200077	P07814_930	P07814	P07814200077	DQVDIAVQ	930	D	Q	V	D	I	A	V	Q	10	702.905	2	-4.8	1405.81	37.209	34	0.0099	SerTyr-IAVQELLQLK	IAVQELLQLK		No
10000177287	200077	Q9P1Z2_135	Q9P1Z2	Q9P1Z2200077	EEADGGSD	135	E	E	A	D	G	G	S	D	11	674.391	2	17	1348.78	29.437	27.9	0.00088	SerTyr-GGSDILLVVPK	GGSDILLVVPK		No
10000177288	200077	O15042_738	O15042	O15042200077	DDLDGVPL	738	D	D	L	D	G	V	P	L	12	503.91	3	-18	1511.73	21.142	24.1	0.00023	SerTyr-GVPLDATEDSKK	GVPLDATEDSKK		No
10000177291	200077	P09234_11	P09234	P09234200077	DYCDTYLT	11	D	Y	C	D	T	Y	L	T	11	509.246	3	-3.7	1527.74	22.281	22.6	0.00017	SerTyr-TYLTHDSPSVR	TYLTHDSPSVR		No
10000177292	200077	O00499_302	O00499	O00499200077	SPPDGSPA	302	S	P	P	D	G	S	P	A	10	624.825	2	17	1249.65	18.185	28.4	0.002	SerTyr-GSPAATPEIR	GSPAATPEIR		No
10000177296	200077	P35579_1154	P35579	P35579200077	DTLDSTAA	1154	D	T	L	D	S	T	A	A	9	627.31	2	0.86	1254.62	20.694	31.1	0.013	SerTyr-STAAQQELR	STAAQQELR		No
10000177299	200077	O43815_437	O43815	O43815200077	NEADSLTY	437	N	E	A	D	S	L	T	Y	10	694.876	2	54	1389.75	24.716	27.4	0.0047	SerTyr-SLTYDIANNK	SLTYDIANNK		No
10000177300	200077	Q92945_129	Q92945	Q92945200077	SQGDSISS	129	S	Q	G	D	S	I	S	S	14	579.301	3	-14	1737.9	27.325	27.1	0.0042	SerTyr-SISSQLGPIHPPPR	SISSQLGPIHPPPR		No
10000177308	200077	Q13177_149	Q13177	Q13177200077	PEKDGFPS	149	P	E	K	D	G	F	P	S	12	705.349	2	-11	1410.7	26.961	24.7	0.0036	SerTyr-GFPSGTPALNAK	GFPSGTPALNAK		No
10000177318	200077	Q12912_182	Q12912	Q12912200077	ASGDSVVS	182	A	S	G	D	S	V	V	S	12	738.93	2	15	1477.86	26.082	25.3	0.013	SerTyr-SVVSPLPVTTVK	SVVSPLPVTTVK		No
10000177319	200077	P43243_681	P43243	P43243200077	DETDLANL	681	D	E	T	D	L	A	N	L	13	513.266	3	-0.84	1539.8	25.907	23.4	0.0078	SerTyr-LANLGDVASDGKK	LANLGDVASDGKK		No
10000177330	100080	P14317_27	P14317	P14317100080	TDPDFVND	27	T	D	P	D	F	V	N	D	8	601.282	2	-14	1202.56	26.495	28.1	0.016	SerTyr-FVNDISEK	FVNDISEK		No
10000177335	100080	P60709_158	P60709	P60709100080	DSGDGVTH	158	D	S	G	D	G	V	T	H	20	615.083	4	6.6	2460.33	31.605	33.1	0.0046	SerTyr-GVTHTVPIYEGYALPHAILR	GVTHTVPIYEGYALPHAILR	yes	No	TRUE
10000177336	100080	P60709_245	P60709	P60709100080	ELPDGQVI	245	E	L	P	D	G	Q	V	I	10	668.834	2	-18	1337.67	26.368	38.4	0.005	SerTyr-GQVITIGNER	GQVITIGNER	yes	No	TRUE
10000177393	100080	P27816_328	P27816	P27816100080	TETDVSSA	328	T	E	T	D	V	S	S	A	19	730.724	3	-3.6	2192.17	27.812	45	0.00025	SerTyr-VSSAKNVVLPTETEVAPAK	VSSAKNVVLPTETEVAPAK		No
10000177397	100080	P27816_47	P27816	P27816100080	GKTDYIPL	47	G	K	T	D	Y	I	P	L	10	727.862	2	-17	1455.72	34.953	36.9	0.015	SerTyr-YIPLLDVDEK	YIPLLDVDEK		No
10000177398	100080	P27816_9	P27816	P27816100080	SLADALTE	9	S	L	A	D	A	L	T	E	15	635.664	3	9.3	1906.99	28.744	34.9	0.018	SerTyr-ALTEPSPDIEGEIKR	ALTEPSPDIEGEIKR		No
10000177405	100080	P26599_173	P26599	P26599100080	AAVDAGMA	173	A	A	V	D	A	G	M	A	13	785.864	2	-9.3	1571.73	23.956	44	5.2e-06	SerTyr-AGM(Oxidation)AM(Oxidation)AGQSPVLR	AGMAMAGQSPVLR		No
10000177408	100080	P26599_3	P26599	P26599100080	--MDGIVP	3	-	-	M	D	G	I	V	P	12	492.612	3	0.042	1477.84	28.529	35	0.0026	SerTyr-GIVPDIAVGTKR	GIVPDIAVGTKR		No
10000177420	100080	P80723_166	P80723	P80723100080	TKSDGAPA	166	T	K	S	D	G	A	P	A	19	660.98	3	5.8	1982.94	19.901	45.8	6.9e-07	SerTyr-GAPASDSKPGSSEAAPSSK	GAPASDSKPGSSEAAPSSK		No
10000177423	100080	P80723_172	P80723	P80723100080	PASDSKPG	172	P	A	S	D	S	K	P	G	13	494.91	3	6.1	1484.73	17.108	39.5	0.00045	SerTyr-SKPGSSEAAPSSK	SKPGSSEAAPSSK		No
10000177432	100080	P52566_56	P52566	P52566100080	LLGDGPVV	56	L	L	G	D	G	P	V	V	8	531.775	2	-3.4	1063.55	22.832	26.6	0.013	SerTyr-GPVVTDPK	GPVVTDPK		No
10000177433	100080	P52566_20	P52566	P52566100080	DELDSKLN	20	D	E	L	D	S	K	L	N	11	517.284	3	-0.19	1551.85	22.329	27.9	0.016	SerTyr-SKLNYKPPPQK	SKLNYKPPPQK		No
10000177434	100080	Q08211_97	Q08211	Q08211100080	DTPDTTAN	97	D	T	P	D	T	T	A	N	24	884.777	3	-6.4	2654.33	32.228	57.3	1.1e-08	SerTyr-TTANAEGDLPTTMGGPLPPHLALK	TTANAEGDLPTTMGGPLPPHLALK		No
10000177436	100080	Q08211_168	Q08211	Q08211100080	EEVDLNAG	168	E	E	V	D	L	N	A	G	15	629.992	3	14	1889.98	30.617	35.4	0.00067	SerTyr-LNAGLHGNWTLENAK	LNAGLHGNWTLENAK		No
10000177441	100080	P26368_129	P26368	P26368100080	MTPDGLAV	129	M	T	P	D	G	L	A	V	18	692.688	3	-15	2078.06	30.041	51.2	4.8e-07	SerTyr-GLAVTPTPVPVVGSQM(Oxidation)TR	GLAVTPTPVPVVGSQMTR		No
10000177445	100080	P50851_1757	P50851	P50851100080	SSVDSAQA	1757	S	S	V	D	S	A	Q	A	15	851.849	2	-4.1	1703.7	20.132	57.4	1.1e-06	SerTyr-SAQASDM(Oxidation)GGESPGSR	SAQASDMGGESPGSR		No
10000177446	100080	P50851_1785	P50851	P50851100080	PTVDSVSQ	1785	P	T	V	D	S	V	S	Q	15	958.424	2	-15	1916.85	25.76	50.1	1.4e-05	SerTyr-SVSQDPVSNM(Oxidation)SITER	SVSQDPVSNMSITER		No
10000177450	100080	Q13435_777	Q13435	Q13435100080	EAMDGSET	777	E	A	M	D	G	S	E	T	15	651.338	3	-6.4	1954.01	31.217	40.1	0.00026	SerTyr-GSETPQLFTVLPEKR	GSETPQLFTVLPEKR		No
10000177456	100080	Q13469_67	Q13469	Q13469100080	DVLDYGLK	67	D	V	L	D	Y	G	L	K	19	747.046	3	-6.7	2241.14	32.264	48.9	3.5e-05	SerTyr-YGLKPYSPLASLSGEPPGR	YGLKPYSPLASLSGEPPGR		No
10000177457	100080	P06396_404	P06396	P06396100080	DQTDGLGL	404	D	Q	T	D	G	L	G	L	16	656.01	3	6.0	1968.03	34.154	52	8.9e-07	SerTyr-GLGLSYLSSHIANVER	GLGLSYLSSHIANVER		No
10000177459	100080	P06396_640	P06396	P06396100080	SEPDGFWE	640	S	E	P	D	G	F	W	E	9	607.79	2	-10	1215.58	34.093	35.4	0.0035	SerTyr-GFWEALGGK	GFWEALGGK		No
10000177461	100080	Q1KMD3_127	Q1KMD3	Q1KMD3100080	AEPDASEK	127	A	E	P	D	A	S	E	K	25	851.067	3	-1.2	2553.2	23.379	61	1.6e-08	SerTyr-ASEKPAEATAGSGGVNGGEEQGLGK	ASEKPAEATAGSGGVNGGEEQGLGK		No
10000177468	100080	Q96AE4_182	Q96AE4	Q96AE4100080	HHGDGPGN	182	H	H	G	D	G	P	G	N	15	881.434	2	-14	1762.87	31.715	45.5	2.7e-05	SerTyr-GPGNAVQEIMIPASK	GPGNAVQEIMIPASK		No
10000177470	100080	P09496_77	P09496	P09496100080	DAVDGVMN	77	D	A	V	D	G	V	M	N	26	1039.76	3	-20	3119.29	30.54	57.9	9.7e-09	SerTyr-GVM(Oxidation)NGEYYQESNGPTDSYAAISQVDR	GVMNGEYYQESNGPTDSYAAISQVDR		No
10000177475	100080	P35269_273	P35269	P35269100080	QEVDYMSD	273	Q	E	V	D	Y	M	S	D	16	999.387	2	-13	1998.77	22.94	48	1e-07	SerTyr-YMSDGSSSSQEEPESK	YMSDGSSSSQEEPESK		No
10000177479	100080	P62328_7	P62328	P62328100080	DKPDMAEI	7	D	K	P	D	M	A	E	I	9	459.554	3	5.3	1378.66	25.086	29.9	0.0029	SerTyr-M(Oxidation)AEIEKFDK	MAEIEKFDK		No
10000177485	100080	P15170_40	P15170	P15170100080	SLGDGRPP	40	S	L	G	D	G	R	P	P	22	712.072	4	0.67	2848.29	27.131	48.1	2.1e-05	SerTyr-GRPPEESAHEMM(Oxidation)EEEEEIPKPK	GRPPEESAHEMMEEEEEIPKPK		No
10000177488	100080	P21333_1049	P21333	P21333100080	VTYDGVPV	1049	V	T	Y	D	G	V	P	V	21	775.75	3	-5.2	2327.25	32.933	34.9	3.5e-05	SerTyr-GVPVPGSPFPLEAVAPTKPSK	GVPVPGSPFPLEAVAPTKPSK		No
10000177490	100080	P21333_1505	P21333	P21333100080	DNADGTQT	1505	D	N	A	D	G	T	Q	T	11	736.349	2	-18	1472.7	24.973	40.5	0.0021	SerTyr-GTQTVNYVPSR	GTQTVNYVPSR		No
10000177497	100080	P39880_1340	P39880	P39880100080	DSCDGVEA	1340	D	S	C	D	G	V	E	A	17	962.418	2	-8.5	1924.84	24.159	40.6	0.0003	SerTyr-GVEATEGPGSADTEEPK	GVEATEGPGSADTEEPK		No
10000177498	100080	P39880_377	P39880	P39880100080	GTQDAAKP	377	G	T	Q	D	A	A	K	P	12	525.314	3	5.1	1575.94	33.558	26.9	0.0016	SerTyr-AAKPLEVLLLEK	AAKPLEVLLLEK	yes	No
10000177500	100080	P43243_764	P43243	P43243100080	ENADGQSD	764	E	N	A	D	G	Q	S	D	17	765.66	3	-0.62	2296.98	26.594	38	7e-05	SerTyr-GQSDENKDDYTIPDEYR	GQSDENKDDYTIPDEYR		No
10000177501	100080	P43243_681	P43243	P43243100080	DETDLANL	681	D	E	T	D	L	A	N	L	13	513.269	3	5.1	1539.81	26.972	46.6	0.00022	SerTyr-LANLGDVASDGKK	LANLGDVASDGKK		No
10000177509	100080	Q14160_636	Q14160	Q14160100080	MQPDGEGP	636	M	Q	P	D	G	E	G	P	21	600.039	4	3.2	2400.16	28.982	44.1	6.4e-08	SerTyr-GEGPVAPGGWHNGPHAPWAPR	GEGPVAPGGWHNGPHAPWAPR		No
10000177510	100080	Q14160_1198	Q14160	Q14160100080	ASTDAALE	1198	A	S	T	D	A	A	L	E	21	766.404	3	-2.3	2299.21	35.346	50.1	9.8e-05	SerTyr-AALEVSPGVIANPFAAGIGHR	AALEVSPGVIANPFAAGIGHR		No
10000177511	100080	P36915_344	P36915	P36915100080	QQTDSAME	344	Q	Q	T	D	S	A	M	E	12	785.344	2	-2.5	1570.69	21.611	47.6	8.3e-05	SerTyr-SAM(Oxidation)EPTGPTQER	SAMEPTGPTQER		No
10000177512	100080	P36915_50	P36915	P36915100080	EQTDTSDG	50	E	Q	T	D	T	S	D	G	12	530.249	3	-2.0	1590.75	22.619	27.1	0.0013	SerTyr-TSDGESVTHHIR	TSDGESVTHHIR		No
10000177514	100080	Q6ZRS2_2276	Q6ZRS2	Q6ZRS2100080	NENDGFPA	2276	N	E	N	D	G	F	P	A	22	848.692	3	1.7	2546.08	25.472	41.8	1.8e-06	SerTyr-GFPAGEGEEAGRPGAEDEEM(Oxidation)SR	GFPAGEGEEAGRPGAEDEEMSR		No
10000177523	100080	Q96I24_35	Q96I24	Q96I24100080	AKIDSIPH	35	A	K	I	D	S	I	P	H	23	912.447	3	-15	2737.34	33.287	55.6	2.6e-06	SerTyr-SIPHLNNSTPLVDPSVYGYGVQK	SIPHLNNSTPLVDPSVYGYGVQK		No
10000177524	100080	Q96I24_160	Q96I24	Q96I24100080	NDIDSNST	160	N	D	I	D	S	N	S	T	14	875.95	2	-17	1751.9	32.595	40.1	5.6e-06	SerTyr-SNSTIQEILIPASK	SNSTIQEILIPASK		No
10000177525	100080	Q9Y2X7_419	Q9Y2X7	Q9Y2X7100080	DLSDGAVT	419	D	L	S	D	G	A	V	T	13	581.322	3	8.7	1743.97	32.572	39	7.2e-05	SerTyr-GAVTLQEYLELKK	GAVTLQEYLELKK		No
10000177526	100080	Q9Y2X7_633	Q9Y2X7	Q9Y2X7100080	ESLDGDLD	633	E	S	L	D	G	D	L	D	16	959.968	2	-18	1919.94	33.139	39.5	0.0006	SerTyr-GDLDPGLPSTEDVILK	GDLDPGLPSTEDVILK		No
10000177529	100080	Q14151_262	Q14151	Q14151100080	DLFDSAHP	262	D	L	F	D	S	A	H	P	23	655.05	4	5.6	2620.2	24.013	41.2	1.8e-05	SerTyr-SAHPEEGDLDLASESTAHAQSSK	SAHPEEGDLDLASESTAHAQSSK	yes	No
10000177532	100080	P20810_349	P20810	P20810100080	TDKDGKPL	349	T	D	K	D	G	K	P	L	15	492.026	4	1.6	1968.11	22.823	39	1.5e-06	SerTyr-GKPLLPEPEEKPKPR	GKPLLPEPEEKPKPR		No
10000177533	100080	P20810_514	P20810	P20810100080	FLLDALSE	514	F	L	L	D	A	L	S	E	16	950.931	2	-20	1901.86	29.445	47.4	1.9e-05	SerTyr-ALSEDFSGPQNASSLK	ALSEDFSGPQNASSLK		No
10000177537	100080	Q8N1G4_526	Q8N1G4	Q8N1G4100080	TEADAVSG	526	T	E	A	D	A	V	S	G	17	945.459	2	-7.3	1890.92	26.273	50.9	2.7e-06	SerTyr-AVSGQLPDPTTNPSAGK	AVSGQLPDPTTNPSAGK		No
10000177542	100080	Q99733_47	Q99733	Q99733100080	ERLDNVPH	47	E	R	L	D	N	V	P	H	15	644.988	3	-11	1934.96	29.737	42	9.9e-06	SerTyr-NVPHTPSSYIETLPK	NVPHTPSSYIETLPK		No
10000177543	100080	Q96PK2_1524	Q96PK2	Q96PK2100080	DLCDGSAN	1524	D	L	C	D	G	S	A	N	20	829.745	3	-0.16	2489.24	31.571	43.4	5.1e-06	SerTyr-GSANQLQQLQSQLAHQTEQK	GSANQLQQLQSQLAHQTEQK		No
10000177544	100080	Q96PK2_3794	Q96PK2	Q96PK2100080	DTTDGYMG	3794	D	T	T	D	G	Y	M	G	14	605.957	3	-0.35	1817.87	24.365	43	1.4e-05	SerTyr-GYM(Oxidation)GVNQAPEKLDK	GYMGVNQAPEKLDK	yes	No
10000177546	100080	P06454_4	P06454	P06454100080	-MSDAAVD	4	-	M	S	D	A	A	V	D	12	736.85	2	-13	1473.7	24.527	51.9	0.00032	SerTyr-AAVDTSSEITTK	AAVDTSSEITTK		No
10000177549	100080	Q86WB0_296	Q86WB0	Q86WB0100080	TDLDASFG	296	T	D	L	D	A	S	F	G	19	741.045	3	-1.5	2223.14	32.678	43.2	8.1e-05	SerTyr-ASFGLTSSPIPGLEGRPER	ASFGLTSSPIPGLEGRPER		No
10000177552	100080	P49792_1158	P49792	P49792100080	HETDGGSA	1158	H	E	T	D	G	G	S	A	24	681.553	4	2.2	2726.21	28.036	37.8	4.3e-06	SerTyr-GGSAHGDDDDDGPHFEPVVPLPDK	GGSAHGDDDDDGPHFEPVVPLPDK		No
10000177555	100080	O75369_1477	O75369	O75369100080	DNGDGTHT	1477	D	N	G	D	G	T	H	T	20	816.716	3	-1.6	2450.15	27.442	58.6	7.6e-06	SerTyr-GTHTVTYTPSQEGPYM(Oxidation)VSVK	GTHTVTYTPSQEGPYMVSVK		No
10000177561	100080	Q14657_29	Q14657	Q14657100080	GGVDTAAA	29	G	G	V	D	T	A	A	A	19	625.317	3	3.0	1875.95	22.574	42.6	3.4e-05	SerTyr-TAAAPAGGAPPAHAPGPGR	TAAAPAGGAPPAHAPGPGR		No
10000177570	100080	Q9H4A3_653	Q9H4A3	Q9H4A3100080	VLSDGTVD	653	V	L	S	D	G	T	V	D	16	932.408	2	-14	1864.82	26.148	51.6	1.9e-05	SerTyr-GTVDSGQGSSVFTESR	GTVDSGQGSSVFTESR		No
10000177571	100080	Q9H4A3_2026	Q9H4A3	Q9H4A3100080	DVDDGSGS	2026	D	V	D	D	G	S	G	S	14	552.593	3	-7.3	1657.78	19.18	27.3	0.00016	SerTyr-GSGSPHSPHQLSSK	GSGSPHSPHQLSSK		No
10000177574	100080	Q07666_76	Q07666	Q07666100080	TGPDATVG	76	T	G	P	D	A	T	V	G	21	1091.57	2	-16	2183.15	30.397	48.9	7.6e-07	SerTyr-ATVGGPAPTPLLPPSATASVK	ATVGGPAPTPLLPPSATASVK		No
10000177577	100080	Q9H6T3_452	Q9H6T3	Q9H6T3100080	DVPDSTTA	452	D	V	P	D	S	T	T	A	26	926.46	3	-11	2779.38	35.302	47.5	1.2e-05	SerTyr-STTAAAPENNPINLANVIAATGTTSK	STTAAAPENNPINLANVIAATGTTSK		No
10000177579	100080	Q9Y5A9_368	Q9Y5A9	Q9Y5A9100080	NGVDGNGV	368	N	G	V	D	G	N	G	V	24	857.401	3	-9.5	2572.2	24.311	50	1.2e-06	SerTyr-GNGVGQSQAGSGSTPSEPHPVLEK	GNGVGQSQAGSGSTPSEPHPVLEK		No
10000177584	100080	Q6ZUJ8_149	Q6ZUJ8	Q6ZUJ8100080	SGCDSVTD	149	S	G	C	D	S	V	T	D	17	721.667	3	-5.6	2165	26.102	44.1	3e-05	SerTyr-SVTDTEPEDEKVVSYSK	SVTDTEPEDEKVVSYSK		No
10000177586	100080	P49023_6	P49023	P49023100080	DDLDALLA	6	D	D	L	D	A	L	L	A	15	612.647	3	-6.9	1837.94	35.15	44	1.7e-05	SerTyr-ALLADLESTTSHISK	ALLADLESTTSHISK		No
10000177587	100080	P49023_336	P49023	P49023100080	SQLDSMLG	336	S	Q	L	D	S	M	L	G	12	771.871	2	-8.4	1543.74	32.642	37.6	0.00062	SerTyr-SMLGSLQSDLNK	SMLGSLQSDLNK		No
10000177588	100080	Q8N684_30	Q8N684	Q8N684100080	DQIDLYDD	30	D	Q	I	D	L	Y	D	D	16	1023.46	2	-13	2046.91	31.76	46.6	7.3e-06	SerTyr-LYDDVLTATSQPSDDR	LYDDVLTATSQPSDDR		No
10000177589	100080	Q8N684_34	Q8N684	Q8N684100080	LYDDVLTA	34	L	Y	D	D	V	L	T	A	12	770.357	2	-14	1540.71	24.405	42.4	0.0015	SerTyr-VLTATSQPSDDR	VLTATSQPSDDR		No
10000177591	100080	Q9Y4K1_68	Q9Y4K1	Q9Y4K1100080	AALDGGVA	68	A	A	L	D	G	G	V	A	18	626.65	3	5.7	1879.95	21.686	34.3	0.00054	SerTyr-GGVASAASPESKPSPGTK	GGVASAASPESKPSPGTK		No
10000177598	100080	O75367_173	O75367	O75367100080	ASADSTTE	173	A	S	A	D	S	T	T	E	17	981.451	2	-20	1962.9	29.591	39	5.5e-05	SerTyr-STTEGTPADGFTVLSTK	STTEGTPADGFTVLSTK		No
10000177600	100080	P49321_33	P49321	P49321100080	TSADKVES	33	T	S	A	D	K	V	E	S	13	566.626	3	2.0	1699.88	23.574	51.1	6.9e-05	SerTyr-KVESLDVDSEAKK	KVESLDVDSEAKK		No
10000177606	100080	Q8WWM7_585	Q8WWM7	Q8WWM7100080	KEVDGLLT	585	K	E	V	D	G	L	L	T	15	878.411	2	-19	1756.82	27.411	45.8	4.9e-05	SerTyr-GLLTSEPM(Oxidation)GSPVSSK	GLLTSEPMGSPVSSK		No
10000177614	100080	Q02750_17	Q02750	Q02750100080	PAPDGSAV	17	P	A	P	D	G	S	A	V	19	1063.99	2	-18	2127.99	28.184	42.5	9.8e-06	SerTyr-GSAVNGTSSAETNLEALQK	GSAVNGTSSAETNLEALQK		No
10000177615	100080	Q02750_283	Q02750	Q02750100080	VEGDAAET	283	V	E	G	D	A	A	E	T	9	415.556	3	11	1246.67	20.637	24.6	0.0092	SerTyr-AAETPPRPR	AAETPPRPR		No
10000177617	100080	Q9C0C9_1226	Q9C0C9	Q9C0C9100080	TAPDASVP	1226	T	A	P	D	A	S	V	P	10	420.576	3	12	1261.73	21.731	25.6	0.0067	SerTyr-ASVPPSVKPK	ASVPPSVKPK		No
10000177619	100080	Q96D71_518	Q96D71	Q96D71100080	SSSDSFTS	518	S	S	S	D	S	F	T	S	15	944.423	2	-17	1888.85	29.083	37.3	0.0006	SerTyr-SFTSDPEQIGSNVTR	SFTSDPEQIGSNVTR		No
10000177620	100080	O15042_738	O15042	O15042100080	DDLDGVPL	738	D	D	L	D	G	V	P	L	18	560.294	4	11	2241.18	26.676	39.9	2.4e-05	SerTyr-GVPLDATEDSKKNEPIFK	GVPLDATEDSKKNEPIFK		No
10000177622	100080	Q92576_1398	Q92576	Q92576100080	EENDFFNS	1398	E	E	N	D	F	F	N	S	11	530.938	3	1.9	1592.81	34.417	39.1	0.00018	SerTyr-FFNSFTTVLHK	FFNSFTTVLHK		No
10000177623	100080	Q92576_1158	Q92576	Q92576100080	SIADALSS	1158	S	I	A	D	A	L	S	S	23	941.114	3	-4.9	2823.34	35.968	41.1	0.00088	SerTyr-ALSSTSNILASEFFEEEKQESPK	ALSSTSNILASEFFEEEKQESPK		No
10000177626	100080	Q9UPT8_68	Q9UPT8	Q9UPT8100080	LEDDGAEE	68	L	E	D	D	G	A	E	E	14	842.35	2	-9.6	1684.7	21.123	45	0.00023	SerTyr-GAEETQDTSGGPER	GAEETQDTSGGPER		No
10000177627	100080	Q9UPT8_742	Q9UPT8	Q9UPT8100080	LEPDSFSE	742	L	E	P	D	S	F	S	E	26	715.364	4	3.8	2861.45	29.302	32.1	0.00086	SerTyr-SFSEGGPPGRPKPGAGVPDFLPSAQR	SFSEGGPPGRPKPGAGVPDFLPSAQR		No
10000177628	100080	O43829_244	O43829	O43829100080	TFNDGMSE	244	T	F	N	D	G	M	S	E	21	851.032	3	-6.4	2553.09	25.489	54.2	9.8e-09	SerTyr-GM(Oxidation)SEVKDEQTPGWTTAASDM(Oxidation)K	GMSEVKDEQTPGWTTAASDMK		No
10000177629	100080	Q13177_149	Q13177	Q13177100080	PEKDGFPS	149	P	E	K	D	G	F	P	S	12	705.351	2	-7.2	1410.7	28.046	42.6	0.00027	SerTyr-GFPSGTPALNAK	GFPSGTPALNAK		No
10000177633	100080	P14866_285	P14866	P14866100080	DTWDYTNP	285	D	T	W	D	Y	T	N	P	19	756.019	3	-2.5	2268.06	23.827	31	0.002	SerTyr-YTNPNLSGQGDPGSNPNKR	YTNPNLSGQGDPGSNPNKR		No
10000177635	100080	P04233_23	P04233	P04233100080	DQRDLISN	23	D	Q	R	D	L	I	S	N	13	875.928	2	-18	1751.86	30.977	45.2	0.00044	SerTyr-LISNNEQLPM(Oxidation)LGR	LISNNEQLPMLGR		No
10000177640	100080	Q92945_129	Q92945	Q92945100080	SQGDSISS	129	S	Q	G	D	S	I	S	S	14	579.309	3	0.71	1737.93	26.931	40.2	3.3e-05	SerTyr-SISSQLGPIHPPPR	SISSQLGPIHPPPR		No
10000177642	100080	Q13428_1102	Q13428	Q13428100080	SGVDSAVG	1102	S	G	V	D	S	A	V	G	19	1040.51	2	-17	2081.03	25.9	35.5	0.00052	SerTyr-SAVGTLPATSPQSTSVQAK	SAVGTLPATSPQSTSVQAK		No
10000177644	100080	Q6JBY9_273	Q6JBY9	Q6JBY9100080	EEVDGQHP	273	E	E	V	D	G	Q	H	P	23	908.743	3	0.73	2726.23	23.257	58.9	2.6e-08	SerTyr-GQHPAQEEVPESPQTSGPEAENR	GQHPAQEEVPESPQTSGPEAENR		No
10000177647	100080	Q12906_440	Q12906	Q12906100080	VEVDGNSF	440	V	E	V	D	G	N	S	F	12	486.904	3	7.2	1460.71	19.73	38.8	0.0004	SerTyr-GNSFEASGPSKK	GNSFEASGPSKK		No
10000177651	100080	P12270_2148	P12270	P12270100080	HRTDGFAE	2148	H	R	T	D	G	F	A	E	16	629.324	3	1.8	1887.97	29.614	51.8	3.2e-08	SerTyr-GFAEAIHSPQVAGVPR	GFAEAIHSPQVAGVPR		No
10000177652	100080	Q96PZ0_51	Q96PZ0	Q96PZ0100080	LQNDFLSI	51	L	Q	N	D	F	L	S	I	19	765.718	3	-4.6	2297.15	33.057	40.8	6.9e-05	SerTyr-FLSISEDVPRPPDTVSTGK	FLSISEDVPRPPDTVSTGK		No
10000177653	100080	Q96PZ0_23	Q96PZ0	Q96PZ0100080	EDNDSGVP	23	E	D	N	D	S	G	V	P	10	441.905	3	15	1325.71	20.757	31.1	0.011	SerTyr-SGVPVEETKK	SGVPVEETKK		No
10000177656	100080	Q9H4M9_416	Q9H4M9	Q9H4M9100080	GAFDGTMN	416	G	A	F	D	G	T	M	N	28	1034.45	3	-11	3103.34	34.766	52.4	3.9e-08	SerTyr-GTM(Oxidation)NGPFGHGYGEGAGEGIDDVEWVVGK	GTMNGPFGHGYGEGAGEGIDDVEWVVGK		No
10000177657	100080	Q9UIU6_318	Q9UIU6	Q9UIU6100080	SSSDGITN	318	S	S	S	D	G	I	T	N	23	928.78	3	-2.9	2786.34	32.491	61.4	5.2e-08	SerTyr-GITNLSLSSHM(Oxidation)EPVYMQQIGNAK	GITNLSLSSHMEPVYMQQIGNAK		No
10000177658	100080	O75822_51	O75822	O75822100080	DVKDNWDD	51	D	V	K	D	N	W	D	D	20	667.804	4	2.5	2671.22	25.668	39.9	7.1e-05	SerTyr-NWDDDDDEKKEEAEVKPEVK	NWDDDDDEKKEEAEVKPEVK		No
10000177662	100080	Q96QC0_367	Q96QC0	Q96QC0100080	ELMDTASL	367	E	L	M	D	T	A	S	L	25	938.46	3	-11	2815.38	29.642	41.4	0.00043	SerTyr-TASLEPGALDAKPVESPGDPNQLTR	TASLEPGALDAKPVESPGDPNQLTR		No
10000177664	100080	P52597_252	P52597	P52597100080	GLSDGYGF	252	G	L	S	D	G	Y	G	F	11	742.339	2	-9.8	1484.68	34.382	39.6	0.00014	SerTyr-GYGFTTDLFGR	GYGFTTDLFGR		No
10000177671	100080	Q9H3P7_344	Q9H3P7	Q9H3P7100080	THTDSSEK	344	T	H	T	D	S	S	E	K	20	803.042	3	-0.93	2409.13	30.038	56	1.1e-07	SerTyr-SSEKELEPEAAEEALENGPK	SSEKELEPEAAEEALENGPK		No
10000177674	100080	Q7L014_872	Q7L014	Q7L014100080	ESQDVMQQ	872	E	S	Q	D	V	M	Q	Q	11	755.876	2	-16	1511.75	26.75	45.9	0.00096	SerTyr-VM(Oxidation)QQATNAILR	VMQQATNAILR		No
10000177676	100080	Q9UMY4_22	Q9UMY4	Q9UMY4100080	DLTDAYGP	22	D	L	T	D	A	Y	G	P	23	914.449	3	-9.4	2743.35	40.211	59	2.6e-07	SerTyr-AYGPPSNFLEIDIFNPQTVGVGR	AYGPPSNFLEIDIFNPQTVGVGR		No
10000177677	100080	P67809_25	P67809	P67809100080	SAADTKPG	25	S	A	A	D	T	K	P	G	28	855.415	3	3.3	2566.25	23.362	44.5	2.7e-07	SerTyr-TKPGTTGSGAGSGGPGGLTSAAPAGGDK	TKPGTTGSGAGSGGPGGLTSAAPAGGDK		No
10000177678	100080	Q6P2E9_486	Q6P2E9	Q6P2E9100080	EENDSLGA	486	E	E	N	D	S	L	G	A	22	755.038	3	-0.61	2265.12	31.893	63.2	3.2e-07	SerTyr-SLGADGTHGAGAMESAAGVLIK	SLGADGTHGAGAMESAAGVLIK		No
10000177685	100080	O43815_437	O43815	O43815100080	NEADSLTY	437	N	E	A	D	S	L	T	Y	14	615.31	3	-1.1	1845.93	29.099	38.9	0.00041	SerTyr-SLTYDIANNKDALR	SLTYDIANNKDALR		No
10000177689	100080	P85037_81	P85037	P85037100080	VSGDSAVA	81	V	S	G	D	S	A	V	A	19	625.338	3	-7.0	1876.01	36.322	60.1	5.6e-07	SerTyr-SAVAGAAPALVAAAAASVR	SAVAGAAPALVAAAAASVR		No
10000177692	100080	P53621_857	P53621	P53621100080	LDEDGFVE	857	L	D	E	D	G	F	V	E	16	914.924	2	-11	1829.85	33.595	48.4	6e-07	SerTyr-GFVEATEGLGDDALGK	GFVEATEGLGDDALGK		No
10000177693	100080	Q13541_26	Q13541	Q13541100080	VLGDGVQL	26	V	L	G	D	G	V	Q	L	26	938.776	3	-16	2816.33	35.067	49.9	6.2e-07	SerTyr-GVQLPPGDYSTTPGGTLFSTTPGGTR	GVQLPPGDYSTTPGGTLFSTTPGGTR		No
10000177695	100080	Q9H6S0_1084	Q9H6S0	Q9H6S0100080	FRVDGIPN	1084	F	R	V	D	G	I	P	N	14	895.338	2	-21	1790.68	23.671	48.9	6.6e-07	SerTyr-GIPNDSSDSEM(Oxidation)EDK	GIPNDSSDSEMEDK		No
10000177698	100080	Q8WYA6_67	Q8WYA6	Q8WYA6100080	IDRDGEEE	67	I	D	R	D	G	E	E	E	18	781.337	3	-3.1	2344.01	24.788	48.9	8.1e-07	SerTyr-GEEEEEEEEPLDESSVKK	GEEEEEEEEPLDESSVKK		No
10000177699	100080	Q7Z4V5_31	Q7Z4V5	Q7Z4V5100080	DIADGAVK	31	D	I	A	D	G	A	V	K	9	386.556	3	19	1159.67	17.957	26.2	0.0021	SerTyr-GAVKPPPNK	GAVKPPPNK		No
10000177703	100080	P49069_10	P49069	P49069100080	VATDGGER	10	V	A	T	D	G	G	E	R	18	644.986	3	-5.2	1934.96	23.703	58.2	1e-06	SerTyr-GGERPGVPAGSGLSASQR	GGERPGVPAGSGLSASQR		No
10000177706	100080	Q13136_219	Q13136	Q13136100080	TLTDGVLD	219	T	L	T	D	G	V	L	D	18	726.005	3	-7.3	2178.01	26.208	47.7	1.3e-06	SerTyr-GVLDINHEQENTPSTSGK	GVLDINHEQENTPSTSGK		No
10000177707	100080	P49756_693	P49756	P49756100080	LPVDSVFN	693	L	P	V	D	S	V	F	N	16	716.979	3	-5.8	2150.94	30.214	56.1	1.5e-06	SerTyr-SVFNKFEDEDSDDVPR	SVFNKFEDEDSDDVPR		No
10000177708	100080	Q9BUJ2_97	Q9BUJ2	Q9BUJ2100080	SGPDGHYA	97	S	G	P	D	G	H	Y	A	10	476.559	3	18	1429.68	23.418	36.8	0.0009	SerTyr-GHYAMDNITR	GHYAMDNITR		No
10000177710	100080	Q8IZ73_442	Q8IZ73	Q8IZ73100080	GLTDSTAP	442	G	L	T	D	S	T	A	P	22	827.727	3	-13	2483.18	32.793	46.8	1.7e-06	SerTyr-STAPSSELGKDDLEELAAAAQK	STAPSSELGKDDLEELAAAAQK		No
10000177711	100080	Q14149_752	Q14149	Q14149100080	TETDAVFL	752	T	E	T	D	A	V	F	L	11	720.881	2	-12	1441.76	36.914	42.4	0.0021	SerTyr-AVFLLESINGK	AVFLLESINGK		No
10000177713	100080	Q9NT62_105	Q9NT62	Q9NT62100080	DDGDGGWV	105	D	D	G	D	G	G	W	V	20	790.388	3	3.5	2371.16	32.527	53.8	1.8e-06	SerTyr-GGWVDTYHNTGITGITEAVK	GGWVDTYHNTGITGITEAVK		No
10000177714	100080	Q99615_9	Q99615	Q99615100080	AECDVVMA	9	A	E	C	D	V	V	M	A	18	761.033	3	-7.4	2283.1	28.801	34.9	4.4e-05	SerTyr-VVM(Oxidation)AATEPELLDDQEAKR	VVMAATEPELLDDQEAKR		No
10000177716	100080	Q16643_478	Q16643	Q16643100080	SLIDLWPG	478	S	L	I	D	L	W	P	G	17	1009.97	2	-16	2019.93	30.344	44.5	2.3e-06	SerTyr-LWPGNGEGASTLQGEPR	LWPGNGEGASTLQGEPR		No
10000177717	100080	Q9P2D1_2286	Q9P2D1	Q9P2D1100080	ETRDGFYM	2286	E	T	R	D	G	F	Y	M	18	777.359	3	9.8	2332.08	33.746	47.9	2.5e-06	SerTyr-GFYM(Oxidation)EDGDPSVAQLLHER	GFYMEDGDPSVAQLLHER		No
10000177722	100080	Q71RC2_574	Q71RC2	Q71RC2100080	VQKDGLNQ	574	V	Q	K	D	G	L	N	Q	19	744.395	3	1.9	2233.19	27.585	49.5	3.6e-06	SerTyr-GLNQTTIPVSPPSTTKPSR	GLNQTTIPVSPPSTTKPSR		No
10000177723	100080	P42345_2460	P42345	P42345100080	EILDGVEL	2460	E	I	L	D	G	V	E	L	11	472.25	3	1.1	1416.75	21.978	40	0.0057	SerTyr-GVELGEPAHKK	GVELGEPAHKK		No
10000177725	100080	Q13123_109	Q13123	Q13123100080	ERRDGVNK	109	E	R	R	D	G	V	N	K	19	818.383	3	-4.8	2455.15	30.46	50.8	4e-06	SerTyr-GVNKDYEETELISTTANYR	GVNKDYEETELISTTANYR		No
10000177727	100080	Q04637_415	Q04637	Q04637100080	PAVDLSPV	415	P	A	V	D	L	S	P	V	12	782.369	2	-15	1564.74	25.267	37.8	0.019	SerTyr-LSPVSEPEEQAK	LSPVSEPEEQAK		No
10000177728	100080	Q08945_174	Q08945	Q08945100080	TQEDGVDP	174	T	Q	E	D	G	V	D	P	15	912.447	2	-17	1824.89	38.287	47.1	5.6e-06	SerTyr-GVDPVEAFAQNVLSK	GVDPVEAFAQNVLSK		No
10000177732	100080	P33992_14	P33992	P33992100080	FYSDSFGG	14	F	Y	S	D	S	F	G	G	14	829.844	2	-15	1659.69	24.231	52.6	6.4e-06	SerTyr-SFGGDAQADEGQAR	SFGGDAQADEGQAR		No
10000177733	100080	Q9UBC2_570	Q9UBC2	Q9UBC2100080	QVLDGAHG	570	Q	V	L	D	G	A	H	G	22	806.739	3	5.3	2420.22	34.4	57.4	6.7e-06	SerTyr-GAHGASLTDLANLSEGVSLAER	GAHGASLTDLANLSEGVSLAER		No
10000177737	100080	Q92598_548	Q92598	Q92598100080	VQTDAQQT	548	V	Q	T	D	A	Q	Q	T	25	983.124	3	-7.9	2949.37	27.062	44.4	7.7e-06	SerTyr-AQQTSQSPPSPELTSEENKIPDADK	AQQTSQSPPSPELTSEENKIPDADK		No
10000177744	100080	Q03164_2385	Q03164	Q03164100080	QHTDSTQS	2385	Q	H	T	D	S	T	Q	S	16	972.9	2	-20	1945.8	21.545	41.1	1.5e-05	SerTyr-STQSANSSPDEDTEVK	STQSANSSPDEDTEVK		No
10000177747	100080	Q8NDX1_536	Q8NDX1	Q8NDX1100080	VQPDIHLT	536	V	Q	P	D	I	H	L	T	12	418.214	4	3.1	1672.86	24.682	40.2	1.6e-05	SerTyr-IHLTSAEHENLR	IHLTSAEHENLR		No
10000177753	100080	O60508_205	O60508	O60508100080	DEKDVAKP	205	D	E	K	D	V	A	K	P	18	574.287	4	-5.7	2297.15	28.013	40.1	2.2e-05	SerTyr-VAKPSEEEQKELDEITAK	VAKPSEEEQKELDEITAK		No
10000177754	100080	Q9Y5S9_7	Q9Y5S9	Q9Y5S9100080	DVLDLHEA	7	D	V	L	D	L	H	E	A	21	642.769	4	3.5	2571.08	24.747	49.1	2.5e-05	SerTyr-LHEAGGEDFAM(Oxidation)DEDGDESIHK	LHEAGGEDFAMDEDGDESIHK		No
10000177756	100080	O15015_1006	O15015	O15015100080	MVVDSVLE	1006	M	V	V	D	S	V	L	E	18	1013.47	2	-12	2026.94	39.272	51.8	2.6e-05	SerTyr-SVLEDIVNSVSGEGGDAK	SVLEDIVNSVSGEGGDAK		No
10000177757	100080	P42892_34	P42892	P42892100080	DLVDSLSE	34	D	L	V	D	S	L	S	E	20	813.383	3	-1.2	2440.15	31.2	43.9	2.7e-05	SerTyr-SLSEGDAYPNGLQVNFHSPR	SLSEGDAYPNGLQVNFHSPR		No
10000177759	100080	O15020_1753	O15020	O15020100080	ERVDSANA	1753	E	R	V	D	S	A	N	A	17	605.315	3	-0.54	1815.94	29.496	41	2.8e-05	SerTyr-SANALANGLIAGGHAAR	SANALANGLIAGGHAAR		No	TRUE
10000177760	100080	P16333_89	P16333	P16333100080	SVPDSASP	89	S	V	P	D	S	A	S	P	15	900.376	2	-15	1800.75	26.648	46.1	2.8e-05	SerTyr-SASPADDSFVDPGER	SASPADDSFVDPGER		No
10000177761	100080	O60684_70	O60684	O60684100080	LLMDSYVS	70	L	L	M	D	S	Y	V	S	14	868.907	2	-16	1737.81	27.006	45	2.9e-05	SerTyr-SYVSSTTGESVITR	SYVSSTTGESVITR		No
10000177762	100080	Q8N2F6_87	Q8N2F6	Q8N2F6100080	DLTDGSYD	87	D	L	T	D	G	S	Y	D	14	915.422	2	-10	1830.84	29.952	46.1	2.9e-05	SerTyr-GSYDDVLNAEQLQK	GSYDDVLNAEQLQK		No
10000177768	100080	Q14C86_1103	Q14C86	Q14C86100080	DLPDSASQ	1103	D	L	P	D	S	A	S	Q	16	658.302	3	6.6	1974.91	24.936	39.8	3.5e-05	SerTyr-SASQAAHPQDSAFSYR	SASQAAHPQDSAFSYR		No
10000177769	100080	Q14161_626	Q14161	Q14161100080	LVPDTAEP	626	L	V	P	D	T	A	E	P	20	789.734	3	1.5	2369.2	29.288	50.6	4.2e-05	SerTyr-TAEPHVAPSPTLPSTEDVIR	TAEPHVAPSPTLPSTEDVIR		No
10000177771	100080	Q96T58_2008	Q96T58	Q96T58100080	PKVDATRP	2008	P	K	V	D	A	T	R	P	17	668.683	3	-3.1	2006.05	25.603	48.4	4.9e-05	SerTyr-ATRPEATTEVGPQIGVK	ATRPEATTEVGPQIGVK		No
10000177774	100080	Q96FS4_815	Q96FS4	Q96FS4100080	CLQDGGSP	815	C	L	Q	D	G	G	S	P	14	794.861	2	-6.1	1589.72	25.355	49	5.1e-05	SerTyr-GGSPPGPGDLAEER	GGSPPGPGDLAEER		No
10000177776	100080	O75940_63	O75940	O75940100080	ASSDSFAS	63	A	S	S	D	S	F	A	S	12	542.927	3	6.4	1628.78	24.455	38.6	2.9e-05	SerTyr-SFASTQPTHSWK	SFASTQPTHSWK		No
10000177777	100080	O75934_15	O75934	O75934100080	VVVDALPY	15	V	V	V	D	A	L	P	Y	15	966.944	2	-16	1933.89	33.365	43.4	5.4e-05	SerTyr-ALPYFDQGYEAPGVR	ALPYFDQGYEAPGVR		No
10000177780	100080	O60271_6	O60271	O60271100080	ELEDGVVY	6	E	L	E	D	G	V	V	Y	18	1051.46	2	-20	2102.92	27.648	40.2	5.8e-05	SerTyr-GVVYQEEPGGSGAVMSER	GVVYQEEPGGSGAVMSER		No
10000177784	100080	Q8NCG7_549	Q8NCG7	Q8NCG7100080	TELDGGDQ	549	T	E	L	D	G	G	D	Q	20	802.075	3	-11	2406.22	35.174	53.1	7e-05	SerTyr-GGDQEVLTQPLLGEQSLLTR	GGDQEVLTQPLLGEQSLLTR		No
10000177786	100080	Q92619_40	Q92619	Q92619100080	DGADAVFP	40	D	G	A	D	A	V	F	P	18	973.98	2	-17	1947.96	31.141	39.8	6.5e-05	SerTyr-AVFPGPSLEPPAGSSGVK	AVFPGPSLEPPAGSSGVK		No
10000177787	100080	Q9BSJ2_773	Q9BSJ2	Q9BSJ2100080	MKLDGELG	773	M	K	L	D	G	E	L	G	23	857.75	3	-13	2573.25	31.613	47.8	7.4e-05	SerTyr-GELGGQTLEHSTVLGLPAGAEER	GELGGQTLEHSTVLGLPAGAEER		No
10000177792	100080	Q96MW1_17	Q96MW1	Q96MW1100080	GEGDGGGG	17	G	E	G	D	G	G	G	G	13	736.827	2	-5.9	1473.65	32.67	47.2	8.4e-05	SerTyr-GGGGGFGSWLDGR	GGGGGFGSWLDGR		No
10000177794	100080	O43251_103	O43251	O43251100080	AQTDGQQS	103	A	Q	T	D	G	Q	Q	S	15	937.895	2	-9.5	1875.79	17.456	42.2	8.6e-05	SerTyr-GQQSQTQSSENSESK	GQQSQTQSSENSESK		No
10000177795	100080	Q86V81_94	Q86V81	Q86V81100080	DLFDSGFG	94	D	L	F	D	S	G	F	G	14	715.822	2	-13	1431.64	24.103	46	8.7e-05	SerTyr-SGFGGGAGVETGGK	SGFGGGAGVETGGK		No
10000177796	100080	Q96P70_964	Q96P70	Q96P70100080	EEEDGLAG	964	E	E	E	D	G	L	A	G	15	868.968	2	-7.8	1737.94	42.949	44.3	8.7e-05	SerTyr-GLAGQLLSDILATSK	GLAGQLLSDILATSK		No
10000177802	100080	Q02447_531	Q02447	Q02447100080	NSIDSAGI	531	N	S	I	D	S	A	G	I	19	733.351	3	-4.5	2200.05	27.212	46.2	9.8e-05	SerTyr-SAGIQLHPGENADSPADIR	SAGIQLHPGENADSPADIR		No
10000177803	100080	Q6PH85_43	Q6PH85	Q6PH85100080	EATDSFFQ	43	E	A	T	D	S	F	F	Q	11	533.256	3	8.1	1599.77	29.145	38.9	6.4e-05	SerTyr-SFFQNPDSLHR	SFFQNPDSLHR		No
10000177808	100080	P00519_940	P00519	P00519100080	SLVDAVNS	940	S	L	V	D	A	V	N	S	17	640.325	3	4.8	1920.97	23.118	43.6	0.00011	SerTyr-AVNSDAAKPSQPGEGLK	AVNSDAAKPSQPGEGLK		No
10000177811	100080	P55209_58	P55209	P55209100080	ERLDGLVE	58	E	R	L	D	G	L	V	E	15	941.445	2	-41	1882.89	33.966	46.7	0.00011	SerTyr-GLVETPTGYIESLPR	GLVETPTGYIESLPR		No
10000177818	100080	O60664_220	O60664	O60664100080	TSLDGFDV	220	T	S	L	D	G	F	D	V	11	742.855	2	-7.2	1485.71	27.722	40	0.00011	SerTyr-GFDVASVQQQR	GFDVASVQQQR		No
10000177821	100080	Q9P1Z2_135	Q9P1Z2	Q9P1Z2100080	EEADGGSD	135	E	E	A	D	G	G	S	D	11	674.371	2	-12	1348.74	32.095	40.2	0.00012	SerTyr-GGSDILLVVPK	GGSDILLVVPK		No
10000177824	100080	Q8IZ40_392	Q8IZ40	Q8IZ40100080	AEQDGAPG	392	A	E	Q	D	G	A	P	G	13	774.349	2	-16	1548.7	24.037	51.2	0.00013	SerTyr-GAPGAPVPM(Oxidation)EEAR	GAPGAPVPMEEAR		No
10000177825	100080	P41250_57	P41250	P41250100080	SSMDGAGA	57	S	S	M	D	G	A	G	A	12	716.865	2	-14	1433.73	30.17	46	0.00013	SerTyr-GAGAEEVLAPLR	GAGAEEVLAPLR		No
10000177828	100080	Q14839_1234	Q14839	Q14839100080	EATDGGGD	1234	E	A	T	D	G	G	G	D	19	568.752	4	9.4	2275.01	23.082	38.4	7.8e-05	SerTyr-GGGDNKEGEDSSVIHYDDK	GGGDNKEGEDSSVIHYDDK		No
10000177829	100080	P08047_200	P08047	P08047100080	VQQDGSGQ	200	V	Q	Q	D	G	S	G	Q	19	753.388	3	-17	2260.16	31.231	49.5	0.00016	SerTyr-GSGQIQIIPGANQQIITNR	GSGQIQIIPGANQQIITNR		No
10000177830	100080	P33991_133	P33991	P33991100080	LQSDGAAA	133	L	Q	S	D	G	A	A	A	17	962.45	2	-19	1924.9	30.722	43	0.00016	SerTyr-GAAAEDIVASEQSLGQK	GAAAEDIVASEQSLGQK		No
10000177835	100080	Q9Y244_13	Q9Y244	Q9Y244100080	ELKDSIPV	13	E	L	K	D	S	I	P	V	20	802.404	3	-0.0070	2407.21	34.783	38.5	0.0001	SerTyr-SIPVTELSASGPFESHDLLR	SIPVTELSASGPFESHDLLR		No
10000177838	100080	Q9Y6W5_412	Q9Y6W5	Q9Y6W5100080	TGADGQPA	412	T	G	A	D	G	Q	P	A	16	633.007	3	-0.31	1899.02	26.348	37.1	6.6e-05	SerTyr-GQPAIPPPLSDTTKPK	GQPAIPPPLSDTTKPK		No
10000177839	100080	P82970_58	P82970	P82970100080	ENIDTSAQ	58	E	N	I	D	T	S	A	Q	10	628.302	2	-16	1256.6	21.961	37.8	0.00011	SerTyr-TSAQAVAETK	TSAQAVAETK		No
10000177841	100080	Q9Y4X4_74	Q9Y4X4	Q9Y4X4100080	LSVDHFQT	74	L	S	V	D	H	F	Q	T	15	669.662	3	-5.5	2008.99	28.899	46.6	0.00031	SerTyr-HFQTQTEPVDLSINK	HFQTQTEPVDLSINK		No
10000177842	100080	O43719_40	O43719	O43719100080	GEPDSLGQ	40	G	E	P	D	S	L	G	Q	18	791.037	3	-5.1	2373.11	30.55	49	0.00032	SerTyr-SLGQQPTDTPYEWDLDKK	SLGQQPTDTPYEWDLDKK		No
10000177843	100080	Q5PRF9_413	Q5PRF9	Q5PRF9100080	TAKDGAPG	413	T	A	K	D	G	A	P	G	22	785.721	3	-5.9	2357.16	28.283	38	0.00014	SerTyr-GAPGEPPLPGAEPPLAHPGTDK	GAPGEPPLPGAEPPLAHPGTDK		No
10000177844	100080	Q13367_844	Q13367	Q13367100080	TLTDSTLV	844	T	L	T	D	S	T	L	V	16	909.993	2	-9.4	1819.99	35.587	39.1	0.00023	SerTyr-STLVPSLLSPVSGVGR	STLVPSLLSPVSGVGR		No
10000177846	100080	Q99848_212	Q99848	Q99848100080	DKLDFLEG	212	D	K	L	D	F	L	E	G	12	551.288	3	4.0	1653.86	26.898	40.9	0.00035	SerTyr-FLEGDQKPLAQR	FLEGDQKPLAQR		No
10000177848	100080	Q96ST2_348	Q96ST2	Q96ST2100080	MQNDSFHS	348	M	Q	N	D	S	F	H	S	10	495.536	3	4.4	1486.61	19.338	34.5	3.5e-05	SerTyr-SFHSDSHM(Oxidation)DR	SFHSDSHMDR		No
10000177851	100080	O14818_14	O14818	O14818100080	FSPDGHLF	14	F	S	P	D	G	H	L	F	14	623.65	3	9.1	1870.95	30.478	49.9	0.00038	SerTyr-GHLFQVEYAQEAVK	GHLFQVEYAQEAVK	yes	No
10000177854	100080	O75925_101	O75925	O75925100080	LTYDGHPA	101	L	T	Y	D	G	H	P	A	17	640.696	3	7.4	1922.09	33.188	50.8	0.00045	SerTyr-GHPASSPLLPVSLLGPK	GHPASSPLLPVSLLGPK		No
10000177857	100080	P49006_64	P49006	P49006100080	ATGDAIEP	64	A	T	G	D	A	I	E	P	14	808.395	2	-7.9	1616.79	24.299	48.3	0.00048	SerTyr-AIEPAPPSQGAEAK	AIEPAPPSQGAEAK		No
10000177859	100080	Q6PKG0_173	Q6PKG0	Q6PKG0100080	DFGDAINW	173	D	F	G	D	A	I	N	W	13	561.953	3	-3.4	1685.86	30.584	43.8	0.00052	SerTyr-AINWPTPGEIAHK	AINWPTPGEIAHK		No
10000177860	100080	Q6ZTU2_184	Q6ZTU2	Q6ZTU2100080	VFQDGSGL	184	V	F	Q	D	G	S	G	L	25	936.484	3	-15	2809.45	33.658	43.3	0.00056	SerTyr-GSGLTQIAQGAQVQLQHPGTPITVR	GSGLTQIAQGAQVQLQHPGTPITVR	yes	No
10000177862	100080	P54578_228	P54578	P54578100080	KETDSSSA	228	K	E	T	D	S	S	S	A	11	622.287	2	-11	1244.57	19.043	37.1	0.00016	SerTyr-SSSASAATPSK	SSSASAATPSK		No
10000177863	100080	Q9UEW8_434	Q9UEW8	Q9UEW8100080	SVHDSQGP	434	S	V	H	D	S	Q	G	P	12	799.341	2	-8.3	1598.68	22.473	45.3	0.00061	SerTyr-SQGPPNANEDYR	SQGPPNANEDYR		No
10000177864	100080	Q12888_212	Q12888	Q12888100080	SDVDANTA	212	S	D	V	D	A	N	T	A	23	698.087	4	2.0	2792.35	26.144	37.4	0.00021	SerTyr-ANTAIKHEEQSNEDIPIAEQSSK	ANTAIKHEEQSNEDIPIAEQSSK		No
10000177865	100080	Q9BTE6_81	Q9BTE6	Q9BTE6100080	EQADHFTQ	81	E	Q	A	D	H	F	T	Q	16	682.349	3	-6.1	2047.05	30.477	48.5	0.00064	SerTyr-HFTQTPLDPGSQVLVR	HFTQTPLDPGSQVLVR		No
10000177868	100080	O95402_408	O95402	O95402100080	VNLDGQVA	408	V	N	L	D	G	Q	V	A	12	487.606	3	11	1462.82	22.96	39.7	0.0006	SerTyr-GQVAEAGVKPVR	GQVAEAGVKPVR		No
10000177874	100080	P22681_807	P22681	P22681100080	LSLDGDPT	807	L	S	L	D	G	D	P	T	23	689.847	4	0.25	2759.39	25.571	32.8	3.7e-05	SerTyr-GDPTTNVTEGSQVPERPPKPFPR	GDPTTNVTEGSQVPERPPKPFPR		No
10000177877	100080	Q92925_211	Q92925	Q92925100080	AEGDSAGT	211	A	E	G	D	S	A	G	T	16	797.867	2	-4.2	1595.73	21.001	37.8	0.00036	SerTyr-SAGTAGTPGGTPAGDK	SAGTAGTPGGTPAGDK		No
10000177878	100080	P27540_152	P27540	P27540100080	TSTDGSYK	152	T	S	T	D	G	S	Y	K	14	621.643	3	-1.7	1864.93	29.597	43.4	0.00092	SerTyr-GSYKPSFLTDQELK	GSYKPSFLTDQELK		No
10000177882	100080	Q15650_289	Q15650	Q15650100080	DESDYFAS	289	D	E	S	D	Y	F	A	S	12	848.381	2	-6.3	1696.76	31.657	41	0.001	SerTyr-YFASDSNQWLSK	YFASDSNQWLSK		No
10000177883	100080	O60583_455	O60583	O60583100080	DVRDHYIA	455	D	V	R	D	H	Y	I	A	12	567.951	3	2.2	1703.85	22.96	37.1	0.00031	SerTyr-HYIAAQVEQQHK	HYIAAQVEQQHK		No
10000177889	100080	Q9NRY2_58	Q9NRY2	Q9NRY2100080	DFRDHAEQ	58	D	F	R	D	H	A	E	Q	12	546.94	3	4.6	1640.82	18.271	37	0.00035	SerTyr-HAEQQHIAAQQK	HAEQQHIAAQQK		No
10000177890	100080	Q92804_141	Q92804	Q92804100080	QQHDSYSQ	141	Q	Q	H	D	S	Y	S	Q	13	621.615	3	13	1864.84	19.608	31.6	3.6e-05	SerTyr-SYSQNQQSYHSQR	SYSQNQQSYHSQR		No
10000177892	100080	P45974_783	P45974	P45974100080	SAADSISE	783	S	A	A	D	S	I	S	E	11	675.325	2	-38	1350.65	26.642	37.8	0.00051	SerTyr-SISESVPVGPK	SISESVPVGPK		No
10000177893	100080	Q6ZNE5_227	Q6ZNE5	Q6ZNE5100080	SESDSAMT	227	S	E	S	D	S	A	M	T	10	632.783	2	-11	1265.57	18.94	46.2	0.0013	SerTyr-SAM(Oxidation)TSSTVSK	SAMTSSTVSK		No
10000177894	100080	Q13620_44	Q13620	Q13620100080	SATDGNTS	44	S	A	T	D	G	N	T	S	12	706.327	2	-17	1412.65	20.254	37.1	0.00039	SerTyr-GNTSTTPPTSAK	GNTSTTPPTSAK		No
10000177895	100080	O94888_401	O94888	O94888100080	EKADGVVE	401	E	K	A	D	G	V	V	E	12	717.357	2	-14	1434.71	27.791	44.4	0.0014	SerTyr-GVVEGIDVNGPK	GVVEGIDVNGPK		No
10000177896	100080	Q06413_106	Q06413	Q06413100080	DADDSVGH	106	D	A	D	D	S	V	G	H	13	435.951	4	0.88	1743.81	21.35	33.2	7.6e-05	SerTyr-SVGHSPESEDKYR	SVGHSPESEDKYR		No
10000177898	100080	P29692_159	P29692	P29692100080	DDIDLFGS	159	D	D	I	D	L	F	G	S	17	734.338	3	-0.54	2203.01	28.818	35.9	0.00026	SerTyr-LFGSDNEEEDKEAAQLR	LFGSDNEEEDKEAAQLR		No
10000177905	100080	Q12982_84	Q12982	Q12982100080	IDLDGLDT	84	I	D	L	D	G	L	D	T	22	933.076	3	-12	2799.23	33.551	37.9	0.00065	SerTyr-GLDTPSENSNEFEWEDDLPKPK	GLDTPSENSNEFEWEDDLPKPK		No
10000177907	100080	P51991_116	P51991	P51991100080	SREDSVKP	116	S	R	E	D	S	V	K	P	11	462.932	3	4.4	1388.79	22.206	39.5	0.0013	SerTyr-SVKPGAHLTVK	SVKPGAHLTVK		No
10000177911	100080	O15027_838	O15027	O15027100080	SHSDSLAS	838	S	H	S	D	S	L	A	S	13	539.939	3	2.3	1619.82	21.125	40.1	0.0019	SerTyr-SLASQQSVASHPR	SLASQQSVASHPR		No
10000177912	100080	Q96T37_751	Q96T37	Q96T37100080	DRSDGSAP	751	D	R	S	D	G	S	A	P	12	665.803	2	-9.5	1331.61	19.06	37.8	0.00076	SerTyr-GSAPSTSTASSK	GSAPSTSTASSK		No
10000177914	100080	Q6FIF0_127	Q6FIF0	Q6FIF0100080	SVSDTAQQ	127	S	V	S	D	T	A	Q	Q	11	741.826	2	-17	1483.65	19.405	47.5	0.0021	SerTyr-TAQQPSEEQSK	TAQQPSEEQSK		No
10000177915	100080	O95433_19	O95433	O95433100080	ERADATNV	19	E	R	A	D	A	T	N	V	12	593.276	3	5.7	1779.83	27.298	37.4	0.0007	SerTyr-ATNVNNWHWTER	ATNVNNWHWTER		No
10000177918	100080	P24534_103	P24534	P24534100080	DDIDLFGS	103	D	D	I	D	L	F	G	S	15	664.29	3	2.7	1992.87	25.973	34.9	0.00026	SerTyr-LFGSDDEEESEEAKR	LFGSDDEEESEEAKR		No
10000177920	100080	Q7Z6Z7_2931	Q7Z6Z7	Q7Z6Z7100080	STRDSAVA	2931	S	T	R	D	S	A	V	A	11	642.307	2	-13	1284.61	23.725	38.9	0.0016	SerTyr-SAVAISGADSR	SAVAISGADSR		No
10000177922	100080	Q6QNY0_65	Q6QNY0	Q6QNY0100080	AETDSEPE	65	A	E	T	D	S	E	P	E	14	878.89	2	-17	1757.78	23.916	37.8	0.0011	SerTyr-SEPEPEPEPTAAPR	SEPEPEPEPTAAPR		No
10000177923	100080	Q96GM8_8	Q96GM8	Q96GM8100080	DSDDGAVS	8	D	S	D	D	G	A	V	S	15	762.357	2	-17	1524.71	22.957	39.3	0.0021	SerTyr-GAVSAPAASDGGVSK	GAVSAPAASDGGVSK		No
10000177925	100080	Q12912_182	Q12912	Q12912100080	ASGDSVVS	182	A	S	G	D	S	V	V	S	12	738.909	2	-14	1477.82	29.464	39.5	0.0023	SerTyr-SVVSPLPVTTVK	SVVSPLPVTTVK		No
10000177931	100080	P46940_9	P46940	P46940100080	DEVDGLGV	9	D	E	V	D	G	L	G	V	17	523.3	4	65	2093.2	27.148	34.2	0.00026	SerTyr-GLGVARPHYGSVLDNER	GLGVARPHYGSVLDNER		No
10000177932	100080	Q15459_33	Q15459	Q15459100080	SKEDSAPS	33	S	K	E	D	S	A	P	S	18	719.393	3	-4.4	2158.18	30.179	40.2	0.0033	SerTyr-SAPSKPVVGIIYPPPEVR	SAPSKPVVGIIYPPPEVR		No
10000177938	100080	Q15648_1485	Q15648	Q15648100080	SSDDGIRP	1485	S	S	D	D	G	I	R	P	12	547.285	3	5.5	1641.86	26.774	31.4	0.0001	SerTyr-GIRPLPEYSTEK	GIRPLPEYSTEK		No
10000177940	100080	Q8WWI1_963	Q8WWI1	Q8WWI1100080	PSPDASQL	963	P	S	P	D	A	S	Q	L	12	728.863	2	-6.2	1457.73	29.963	47.6	0.0043	SerTyr-ASQLASSLSSQK	ASQLASSLSSQK		No
10000177943	100080	Q8NFZ5_195	Q8NFZ5	Q8NFZ5100080	EHTDGHTS	195	E	H	T	D	G	H	T	S	11	478.919	3	14	1436.76	21.883	39.5	0.0041	SerTyr-GHTSVQSVIEK	GHTSVQSVIEK		No
10000177945	100080	O75376_386	O75376	O75376100080	EIIDGLSE	386	E	I	I	D	G	L	S	E	10	699.311	2	-3.0	1398.62	20.995	45.1	0.0056	SerTyr-GLSEQENNEK	GLSEQENNEK		No
10000177946	100080	Q96PU8_75	Q96PU8	Q96PU8100080	ELPDAVGP	75	E	L	P	D	A	V	G	P	11	716.384	2	-16	1432.77	29.19	44.1	0.0057	SerTyr-AVGPIVQLQEK	AVGPIVQLQEK		No
10000177958	100080	Q9UPN9_830	Q9UPN9	Q9UPN9100080	SELDALAS	830	S	E	L	D	A	L	A	S	10	444.576	3	14	1333.73	25.824	36.5	0.0017	SerTyr-ALASLENHVK	ALASLENHVK		No
10000177960	100080	P46013_174	P46013	P46013100080	DSKDSVAQ	174	D	S	K	D	S	V	A	Q	17	497.739	4	6.8	1990.96	20.759	33.8	0.00056	SerTyr-SVAQGTTNVHSSEHAGR	SVAQGTTNVHSSEHAGR		No
10000177961	100080	P30260_244	P30260	P30260100080	ISPDTVPL	244	I	S	P	D	T	V	P	L	13	762.409	2	-13	1524.82	30.47	41.4	0.0082	SerTyr-TVPLGTGTSILSK	TVPLGTGTSILSK		No
10000177962	100080	O95391_8	O95391	O95391100080	TVVDAVNA	8	T	V	V	D	A	V	N	A	11	632.828	2	-3.1	1265.66	23.976	40.4	0.0085	SerTyr-AVNAAPLSGSK	AVNAAPLSGSK		No
10000177963	100080	O00499_302	O00499	O00499100080	SPPDGSPA	302	S	P	P	D	G	S	P	A	10	624.863	2	77	1249.73	23.479	38.6	0.0052	SerTyr-GSPAATPEIR	GSPAATPEIR		No
10000177968	100080	Q9NZ52_518	Q9NZ52	Q9NZ52100080	HHLDALDQ	518	H	H	L	D	A	L	D	Q	10	690.351	2	-7.4	1380.7	33.89	45.7	0.011	SerTyr-ALDQLLEEAK	ALDQLLEEAK		No
10000177969	100080	Q9UHB9_538	Q9UHB9	Q9UHB9100080	DANDAHQT	538	D	A	N	D	A	H	Q	T	12	518.246	3	0.35	1554.74	17.212	41.2	0.011	SerTyr-AHQTETSSSQVK	AHQTETSSSQVK		No
10000177973	100080	P07814_930	P07814	P07814100080	DQVDIAVQ	930	D	Q	V	D	I	A	V	Q	10	702.903	2	-7.2	1405.81	36.537	46	0.012	SerTyr-IAVQELLQLK	IAVQELLQLK		No
10000177974	100080	P18583_353	P18583	P18583100080	EIADSSMT	353	E	I	A	D	S	S	M	T	14	626.981	3	1.6	1880.94	26.954	35.2	0.0016	SerTyr-SSM(Oxidation)TRPQELPELPK	SSMTRPQELPELPK		No
10000177977	100080	Q02880_1471	Q02880	Q02880100080	NEEDSASV	1471	N	E	E	D	S	A	S	V	12	738.86	2	-16	1477.72	32.519	36.8	0.0037	SerTyr-SASVFSPSFGLK	SASVFSPSFGLK		No
10000177980	100080	P28290_628	P28290	P28290100080	VEEDLFPA	628	V	E	E	D	L	F	P	A	11	769.407	2	-13	1538.81	36.816	38.6	0.0096	SerTyr-LFPAETVELLR	LFPAETVELLR		No
10000177985	100080	Q86TI2_14	Q86TI2	Q86TI2100080	DRGDAAAT	14	D	R	G	D	A	A	A	T	10	604.772	2	-14	1209.54	20.758	35.4	0.0026	SerTyr-AAATDDPAAR	AAATDDPAAR		No
10000177986	100080	P22102_444	P22102	P22102100080	SGVDIAAG	444	S	G	V	D	I	A	A	G	9	591.807	2	-11	1183.61	25.12	38.1	0.0083	SerTyr-IAAGNM(Oxidation)LVK	IAAGNMLVK		No
10000177987	100080	Q9Y4P1_3	Q9Y4P1	Q9Y4P1100080	--MDAATL	3	-	-	M	D	A	A	T	L	10	687.84	2	-13	1375.68	29.296	36.9	0.0054	SerTyr-AATLTYDTLR	AATLTYDTLR		No
10000177989	100080	O60907_137	O60907	O60907100080	SLIDAVMP	137	S	L	I	D	A	V	M	P	10	691.326	2	-24	1382.65	25.019	37.4	0.0071	SerTyr-AVM(Oxidation)PDVVQTR	AVMPDVVQTR	yes	No
10000177991	100080	Q3LXA3_363	Q3LXA3	Q3LXA3100080	EAPDSTAA	363	E	A	P	D	S	T	A	A	10	543.754	2	-5.6	1087.51	16.512	33	0.0012	SerTyr-STAAGGSASK	STAAGGSASK		No
10000177992	100080	Q13263_686	Q13263	Q13263100080	LSLDGADS	686	L	S	L	D	G	A	D	S	10	577.784	2	-6.0	1155.57	21.35	33.8	0.0017	SerTyr-GADSTGVVAK	GADSTGVVAK		No
10000177994	100080	P35579_1154	P35579	P35579100080	DTLDSTAA	1154	D	T	L	D	S	T	A	A	9	627.292	2	-28	1254.58	22.745	38.4	0.012	SerTyr-STAAQQELR	STAAQQELR		No
10000177995	100080	Q9Y618_1935	Q9Y618	Q9Y618100080	GTLDGVYP	1935	G	T	L	D	G	V	Y	P	14	903.975	2	-16	1807.95	36.275	32.1	0.00086	SerTyr-GVYPTLMEPVLLPK	GVYPTLMEPVLLPK		No
10000177996	100080	Q9NYF8_383	Q9NYF8	Q9NYF8100080	EALDYFSD	383	E	A	L	D	Y	F	S	D	9	437.541	3	15	1312.62	20.756	28.8	0.00026	SerTyr-YFSDKESGK	YFSDKESGK		No
10000177999	100080	P17028_10	P17028	P17028100080	VEEDSILI	10	V	E	E	D	S	I	L	I	13	867.432	2	-16	1734.86	33.031	37	0.0097	SerTyr-SILIIPTPDEEEK	SILIIPTPDEEEK		No
10000178003	100080	Q5JSZ5_1777	Q5JSZ5	Q5JSZ5100080	IHVDSVLP	1777	I	H	V	D	S	V	L	P	15	908.481	2	-19	1816.96	35.911	36.3	0.0079	SerTyr-SVLPVPPIEFGVSPK	SVLPVPPIEFGVSPK		No
10000178006	100080	P61158_60	P61158	P61158100080	DDLDFFIG	60	D	D	L	D	F	F	I	G	16	694.011	3	-4.6	2082.03	32.141	31.7	0.0013	SerTyr-FFIGDEAIEKPTYATK	FFIGDEAIEKPTYATK		No	TRUE
10000178008	100080	Q8WXI9_345	Q8WXI9	Q8WXI9100080	AMTDAANS	345	A	M	T	D	A	A	N	S	9	541.263	2	-7.5	1082.53	16.667	33.4	0.0029	SerTyr-AANSQAAAK	AANSQAAAK		No
10000178010	100080	Q92785_116	Q92785	Q92785100080	ISQDGSSL	116	I	S	Q	D	G	S	S	L	9	598.318	2	-2.1	1196.64	33.52	33.4	0.0033	SerTyr-GSSLEALLR	GSSLEALLR		No
10000178012	100080	P09234_11	P09234	P09234100080	DYCDTYLT	11	D	Y	C	D	T	Y	L	T	11	509.253	3	12	1527.76	24.443	27.9	0.00041	SerTyr-TYLTHDSPSVR	TYLTHDSPSVR		No
10000178013	100080	P46777_169	P46777	P46777100080	GAVDGGLS	169	G	A	V	D	G	G	L	S	10	416.221	3	5.5	1248.66	23.122	29.1	0.00069	SerTyr-GGLSIPHSTK	GGLSIPHSTK		No
10000178017	100080	O75400_134	O75400	O75400100080	NSMDVAAG	134	N	S	M	D	V	A	A	G	10	541.774	2	-6.3	1083.55	18.427	34.8	0.011	SerTyr-VAAGTASGAK	VAAGTASGAK		No
10000178020	100080	Q15653_160	Q15653	Q15653100080	EAPDTYLA	160	E	A	P	D	T	Y	L	A	9	635.795	2	-18	1271.59	24.592	32.4	0.0052	SerTyr-TYLAQGPDR	TYLAQGPDR		No
10000178023	100080	Q99459_392	Q99459	Q99459100080	HESDFSGV	392	H	E	S	D	F	S	G	V	8	571.28	2	-10	1142.56	24.992	30.1	0.0021	SerTyr-FSGVTPQR	FSGVTPQR		No
10000178026	100080	Q68CP9_626	Q68CP9	Q68CP9100080	VRVDSVPD	626	V	R	V	D	S	V	P	D	27	751.623	4	0.16	3006.49	27.791	29.9	0.0021	SerTyr-SVPDVSPAPSPAGIPHGSQTIGNHFQR	SVPDVSPAPSPAGIPHGSQTIGNHFQR		No
10000178027	100080	Q86UX7_345	Q86UX7	Q86UX7100080	DVLDSLTT	345	D	V	L	D	S	L	T	T	9	626.342	2	-5.4	1252.68	31.073	35	0.02	SerTyr-SLTTIPELK	SLTTIPELK		No
10000178028	100080	Q9BY77_235	Q9BY77	Q9BY77100080	VQNDAYTA	235	V	Q	N	D	A	Y	T	A	12	748.881	2	-13	1497.76	29.42	32.1	0.0058	SerTyr-AYTAPALPSSIR	AYTAPALPSSIR		No
10000178037	100080	O76003_102	O76003	O76003100080	DRLDGAHA	102	D	R	L	D	G	A	H	A	9	391.872	3	11	1175.62	19.913	26.5	0.00081	SerTyr-GAHAPELTK	GAHAPELTK		No
10000178038	100080	Q8WV28_178	Q8WV28	Q8WV28100080	DEADYVVP	178	D	E	A	D	Y	V	V	P	25	1031.46	3	-9.1	3094.39	29.593	28.7	0.0024	SerTyr-YVVPVEDNDENYIHPTESSSPPPEK	YVVPVEDNDENYIHPTESSSPPPEK		No
10000178051	100080	Q9Y5K8_118	Q9Y5K8	Q9Y5K8100080	EGTDSYEL	118	E	G	T	D	S	Y	E	L	9	630.308	2	-15	1260.62	28.664	27.9	0.0046	SerTyr-SYELTGLAR	SYELTGLAR		No
10000178055	100080	Q99829_465	Q99829	Q99829100080	LDADGGPL	465	L	D	A	D	G	G	P	L	7	494.254	2	-0.57	988.507	19.423	25.4	0.0019	SerTyr-GGPLHTR	GGPLHTR		No
10000178065	100080	Q14566_275	Q14566	Q14566100080	SGVDGYET	275	S	G	V	D	G	Y	E	T	8	587.758	2	-25	1175.52	23.628	25.8	0.0043	SerTyr-GYETEGIR	GYETEGIR		No
10000178066	100080	P23193_125	P23193	P23193100080	NARDTYVS	125	N	A	R	D	T	Y	V	S	8	603.784	2	-16	1207.57	27.023	29	0.017	SerTyr-TYVSSFPR	TYVSSFPR		No
10000178068	100080	Q5T4S7_2904	Q5T4S7	Q5T4S7100080	SAVDSVAG	2904	S	A	V	D	S	V	A	G	11	445.882	3	1.8	1337.65	19.284	27.6	0.01	SerTyr-SVAGEHSVSGR	SVAGEHSVSGR		No
10000178069	100080	O75475_31	O75475	O75475100080	EVPDGAVK	31	E	V	P	D	G	A	V	K	9	387.882	3	3.4	1163.64	18.55	26.5	0.0063	SerTyr-GAVKPPTNK	GAVKPPTNK		No
10000178071	100080	Q9H098_6	Q9H098	Q9H098100080	AEPDYIED	6	A	E	P	D	Y	I	E	D	14	660.659	3	-4.1	1981.98	28.306	25.8	0.005	SerTyr-YIEDDNPELIRPQK	YIEDDNPELIRPQK		No
10000178076	100080	Q9UBN7_1089	Q9UBN7	Q9UBN7100080	DMADSMLM	1089	D	M	A	D	S	M	L	M	8	580.253	2	-22	1160.51	25.242	27.1	0.011	SerTyr-SMLMQGSR	SMLMQGSR		No
10000178080	100080	O15234_390	O15234	O15234100080	AAPDAAPP	390	A	A	P	D	A	A	P	P	12	513.271	3	-0.62	1539.81	22.697	26.4	0.0091	SerTyr-AAPPPPDRPIEK	AAPPPPDRPIEK		No
10000178081	100080	Q5T0D9_10	Q5T0D9	Q5T0D9100080	DSVDSAGT	10	D	S	V	D	S	A	G	T	34	1061.52	3	-14	3184.55	31.489	27.6	0.016	SerTyr-SAGTSPTAVLAAGEEVGAGGGPGGGRPGAGTPLR	SAGTSPTAVLAAGEEVGAGGGPGGGRPGAGTPLR		No
10000178083	100080	Q9Y5B6_222	Q9Y5B6	Q9Y5B6100080	EIPDAAFI	222	E	I	P	D	A	A	F	I	8	369.533	3	9.7	1108.6	24.275	25.2	0.006	SerTyr-AAFIHAAR	AAFIHAAR		No
10000178084	100080	Q9Y2X3_125	Q9Y2X3	Q9Y2X3100080	SQMDGLIP	125	S	Q	M	D	G	L	I	P	9	594.316	2	-14	1188.63	28.792	27.5	0.017	SerTyr-GLIPGVEPR	GLIPGVEPR		No
10000178086	100080	Q6UN15_159	Q6UN15	Q6UN15100080	VDLDSFED	159	V	D	L	D	S	F	E	D	8	438.878	3	7.1	1316.64	25.677	25.2	0.011	SerTyr-SFEDKPWR	SFEDKPWR		No
10000178089	100080	Q99986_232	Q99986	Q99986100080	TSIDAHNG	232	T	S	I	D	A	H	N	G	9	386.859	3	-1.9	1160.58	17.522	24.3	0.0087	SerTyr-AHNGVAPSR	AHNGVAPSR		No
10000178096	100080	Q5T8P6_281	Q5T8P6	Q5T8P6100080	DQVDHNSY	281	D	Q	V	D	H	N	S	Y	11	398.702	4	9.8	1594.81	21.543	25.6	0.019	SerTyr-HNSYVRPPM(Oxidation)PK	HNSYVRPPMPK		No
10000178103	100080	Q92797_29	Q92797	Q92797100080	PGIDGMTT	29	P	G	I	D	G	M	T	T	7	524.222	2	-4.8	1048.44	16.976	23.8	0.017	SerTyr-GM(Oxidation)TTSER	GMTTSER		No
10000178104	100080	P50991_269	P50991	P50991100080	VVSDYAQM	269	V	V	S	D	Y	A	Q	M	6	525.219	2	-5.1	1050.44	19.034	23.4	0.016	SerTyr-YAQM(Oxidation)DR	YAQMDR		No
10000178112	100081	P26599_173	P26599	P26599100081	AAVDAGMA	173	A	A	V	D	A	G	M	A	13	785.853	2	-24	1571.71	24.42	43	7e-06	SerTyr-AGM(Oxidation)AM(Oxidation)AGQSPVLR	AGMAMAGQSPVLR		No
10000178115	100081	P26599_3	P26599	P26599100081	--MDGIVP	3	-	-	M	D	G	I	V	P	12	492.604	3	-16	1477.81	30.024	36.8	0.00074	SerTyr-GIVPDIAVGTKR	GIVPDIAVGTKR		No
10000178121	100081	P80723_166	P80723	P80723100081	TKSDGAPA	166	T	K	S	D	G	A	P	A	19	660.975	3	-1.8	1982.93	20.717	47.4	1.5e-05	SerTyr-GAPASDSKPGSSEAAPSSK	GAPASDSKPGSSEAAPSSK		No
10000178123	100081	P80723_172	P80723	P80723100081	PASDSKPG	172	P	A	S	D	S	K	P	G	13	494.904	3	-5.9	1484.71	17.312	40.3	0.00053	SerTyr-SKPGSSEAAPSSK	SKPGSSEAAPSSK		No
10000178155	100081	P43243_764	P43243	P43243100081	ENADGQSD	764	E	N	A	D	G	Q	S	D	17	765.638	3	-30	2296.91	25.963	38.5	4.2e-05	SerTyr-GQSDENKDDYTIPDEYR	GQSDENKDDYTIPDEYR		No
10000178156	100081	P43243_681	P43243	P43243100081	DETDLANL	681	D	E	T	D	L	A	N	L	13	513.264	3	-5.3	1539.79	27.601	43	0.00058	SerTyr-LANLGDVASDGKK	LANLGDVASDGKK		No
10000178159	100081	Q1KMD3_127	Q1KMD3	Q1KMD3100081	AEPDASEK	127	A	E	P	D	A	S	E	K	25	851.053	3	-18	2553.16	24.016	58.5	3.9e-08	SerTyr-ASEKPAEATAGSGGVNGGEEQGLGK	ASEKPAEATAGSGGVNGGEEQGLGK		No
10000178163	100081	O75995_116	O75995	O75995100081	TSPDYSLD	116	T	S	P	D	Y	S	L	D	10	671.789	2	-34	1343.58	25.764	33.4	0.0036	SerTyr-YSLDSPGPEK	YSLDSPGPEK		No
10000178169	100081	Q13177_90	Q13177	Q13177100081	VGFDAVTG	90	V	G	F	D	A	V	T	G	15	965.421	2	-23	1930.84	33.845	46.1	0.00012	SerTyr-AVTGEFTGMPEQWAR	AVTGEFTGMPEQWAR	yes	No
10000178170	100081	Q13177_149	Q13177	Q13177100081	PEKDGFPS	149	P	E	K	D	G	F	P	S	12	705.338	2	-26	1410.68	28.728	45.4	0.00014	SerTyr-GFPSGTPALNAK	GFPSGTPALNAK		No
10000178178	100081	Q12906_440	Q12906	Q12906100081	VEVDGNSF	440	V	E	V	D	G	N	S	F	11	665.784	2	-23	1331.57	22.937	35	6.2e-05	SerTyr-GNSFEASGPSK	GNSFEASGPSK		No
10000178184	100081	Q6ZRS2_2276	Q6ZRS2	Q6ZRS2100081	NENDGFPA	2276	N	E	N	D	G	F	P	A	22	848.672	3	-22	2546.02	24.744	42.8	3e-07	SerTyr-GFPAGEGEEAGRPGAEDEEM(Oxidation)SR	GFPAGEGEEAGRPGAEDEEMSR		No
10000178186	100081	Q96T58_2008	Q96T58	Q96T58100081	PKVDATRP	2008	P	K	V	D	A	T	R	P	17	668.678	3	-10	2006.03	26.097	48.4	4.1e-05	SerTyr-ATRPEATTEVGPQIGVK	ATRPEATTEVGPQIGVK		No
10000178187	100081	Q96T58_2860	Q96T58	Q96T58100081	VKPDSVTA	2860	V	K	P	D	S	V	T	A	10	626.298	2	-27	1252.6	21.845	31.9	0.00096	SerTyr-SVTASQPPSK	SVTASQPPSK		No
10000178188	100081	Q96T58_1575	Q96T58	Q96T58100081	STTDSIQE	1575	S	T	T	D	S	I	Q	E	12	554.62	3	-12	1663.86	33.925	34	0.0063	SerTyr-SIQEPVVLFHSR	SIQEPVVLFHSR		No
10000178189	100081	Q13435_777	Q13435	Q13435100081	EAMDGSET	777	E	A	M	D	G	S	E	T	15	651.328	3	-22	1953.98	33.908	31.8	0.00018	SerTyr-GSETPQLFTVLPEKR	GSETPQLFTVLPEKR		No
10000178192	100081	P26368_129	P26368	P26368100081	MTPDGLAV	129	M	T	P	D	G	L	A	V	18	687.347	3	-28	2062.04	32.337	58.5	2.4e-08	SerTyr-GLAVTPTPVPVVGSQMTR	GLAVTPTPVPVVGSQMTR		No
10000178197	100081	Q7Z6Z7_2018	Q7Z6Z7	Q7Z6Z7100081	FAADGAST	2018	F	A	A	D	G	A	S	T	23	826.335	3	-26	2479	22.596	57.6	9.8e-09	SerTyr-GASTETSASGTSQGEASTPEESR	GASTETSASGTSQGEASTPEESR		No
10000178198	100081	Q7Z6Z7_2931	Q7Z6Z7	Q7Z6Z7100081	STRDSAVA	2931	S	T	R	D	S	A	V	A	11	642.301	2	-22	1284.6	24.281	38.9	0.0034	SerTyr-SAVAISGADSR	SAVAISGADSR		No
10000178201	100081	P49006_64	P49006	P49006100081	ATGDAIEP	64	A	T	G	D	A	I	E	P	14	808.377	2	-31	1616.75	24.787	45.9	0.0076	SerTyr-AIEPAPPSQGAEAK	AIEPAPPSQGAEAK		No
10000178204	100081	P50851_1785	P50851	P50851100081	PTVDSVSQ	1785	P	T	V	D	S	V	S	Q	15	639.287	3	-12	1917.86	26.48	57.9	2.1e-06	SerTyr-SVSQDPVSNM(Oxidation)SITER	SVSQDPVSNMSITER		No
10000178212	100081	Q14657_29	Q14657	Q14657100081	GGVDTAAA	29	G	G	V	D	T	A	A	A	19	625.308	3	-11	1875.92	23.11	43.4	1.1e-05	SerTyr-TAAAPAGGAPPAHAPGPGR	TAAAPAGGAPPAHAPGPGR		No
10000178214	100081	Q96I24_35	Q96I24	Q96I24100081	AKIDSIPH	35	A	K	I	D	S	I	P	H	23	912.437	3	-26	2737.31	34.391	47.8	2.4e-05	SerTyr-SIPHLNNSTPLVDPSVYGYGVQK	SIPHLNNSTPLVDPSVYGYGVQK		No
10000178215	100081	Q96I24_160	Q96I24	Q96I24100081	NDIDSNST	160	N	D	I	D	S	N	S	T	14	875.936	2	-33	1751.87	33.225	44.9	6.1e-05	SerTyr-SNSTIQEILIPASK	SNSTIQEILIPASK		No
10000178218	100081	O60664_220	O60664	O60664100081	TSLDGFDV	220	T	S	L	D	G	F	D	V	11	742.837	2	-31	1485.67	28.076	41.1	1.9e-05	SerTyr-GFDVASVQQQR	GFDVASVQQQR		No
10000178224	100081	Q9Y5A9_368	Q9Y5A9	Q9Y5A9100081	NGVDGNGV	368	N	G	V	D	G	N	G	V	24	857.389	3	-23	2572.17	23.665	50	1.8e-06	SerTyr-GNGVGQSQAGSGSTPSEPHPVLEK	GNGVGQSQAGSGSTPSEPHPVLEK		No
10000178228	100081	O75376_1827	O75376	O75376100081	ALVDAAAS	1827	A	L	V	D	A	A	A	S	12	721.313	2	-31	1442.63	21.724	40.3	0.0014	SerTyr-AAASAPQM(Oxidation)DVSK	AAASAPQMDVSK		No
10000178230	100081	O75376_386	O75376	O75376100081	EIIDGLSE	386	E	I	I	D	G	L	S	E	10	699.304	2	-12	1398.61	21.664	46.1	0.018	SerTyr-GLSEQENNEK	GLSEQENNEK		No
10000178231	100081	P27816_9	P27816	P27816100081	SLADALTE	9	S	L	A	D	A	L	T	E	15	635.649	3	-15	1906.95	29.355	41.5	0.0026	SerTyr-ALTEPSPDIEGEIKR	ALTEPSPDIEGEIKR		No
10000178233	100081	P27816_47	P27816	P27816100081	GKTDYIPL	47	G	K	T	D	Y	I	P	L	10	727.854	2	-28	1455.71	35.609	31.3	0.0087	SerTyr-YIPLLDVDEK	YIPLLDVDEK		No
10000178234	100081	Q92945_129	Q92945	Q92945100081	SQGDSISS	129	S	Q	G	D	S	I	S	S	14	579.311	3	3.2	1737.93	31.069	50.5	8.3e-06	SerTyr-SISSQLGPIHPPPR	SISSQLGPIHPPPR		No
10000178237	100081	P39880_1340	P39880	P39880100081	DSCDGVEA	1340	D	S	C	D	G	V	E	A	17	962.395	2	-32	1924.79	24.666	40.6	0.00052	SerTyr-GVEATEGPGSADTEEPK	GVEATEGPGSADTEEPK		No
10000178238	100081	P36915_344	P36915	P36915100081	QQTDSAME	344	Q	Q	T	D	S	A	M	E	12	785.325	2	-27	1570.65	21.982	45.5	8e-06	SerTyr-SAM(Oxidation)EPTGPTQER	SAMEPTGPTQER		No
10000178240	100081	Q8WWM7_585	Q8WWM7	Q8WWM7100081	KEVDGLLT	585	K	E	V	D	G	L	L	T	15	878.408	2	-22	1756.82	28.116	43.7	3.9e-05	SerTyr-GLLTSEPM(Oxidation)GSPVSSK	GLLTSEPMGSPVSSK		No
10000178242	100081	Q13428_1102	Q13428	Q13428100081	SGVDSAVG	1102	S	G	V	D	S	A	V	G	19	694.002	3	-31	2082.01	26.619	53.1	3.8e-05	SerTyr-SAVGTLPATSPQSTSVQAK	SAVGTLPATSPQSTSVQAK		No
10000178246	100081	P62328_7	P62328	P62328100081	DKPDMAEI	7	D	K	P	D	M	A	E	I	9	459.547	3	-10	1378.64	29.344	29.6	0.0027	SerTyr-M(Oxidation)AEIEKFDK	MAEIEKFDK		No
10000178250	100081	Q6ZUJ8_149	Q6ZUJ8	Q6ZUJ8100081	SGCDSVTD	149	S	G	C	D	S	V	T	D	17	721.654	3	-24	2164.96	25.474	45.4	1.4e-05	SerTyr-SVTDTEPEDEKVVSYSK	SVTDTEPEDEKVVSYSK		No
10000178257	100081	P24534_103	P24534	P24534100081	DDIDLFGS	103	D	D	I	D	L	F	G	S	15	664.278	3	-16	1992.83	26.484	39.4	2.7e-05	SerTyr-LFGSDDEEESEEAKR	LFGSDDEEESEEAKR		No
10000178260	100081	O43865_74	O43865	O43865100081	SSTDSYSS	74	S	S	T	D	S	Y	S	S	19	758.637	3	-15	2275.91	27.467	56.2	1.3e-09	SerTyr-SYSSAASYTDSSDDEVSPR	SYSSAASYTDSSDDEVSPR		No
10000178264	100081	Q9Y4K1_68	Q9Y4K1	Q9Y4K1100081	AALDGGVA	68	A	A	L	D	G	G	V	A	18	626.636	3	-16	1879.91	22.099	41.5	0.00042	SerTyr-GGVASAASPESKPSPGTK	GGVASAASPESKPSPGTK		No
10000178265	100081	O60271_6	O60271	O60271100081	ELEDGVVY	6	E	L	E	D	G	V	V	Y	18	701.308	3	-20	2103.92	28.222	64.2	2.3e-09	SerTyr-GVVYQEEPGGSGAVMSER	GVVYQEEPGGSGAVMSER		No
10000178268	100081	Q7L014_872	Q7L014	Q7L014100081	ESQDVMQQ	872	E	S	Q	D	V	M	Q	Q	11	755.869	2	-25	1511.74	31.559	46.9	0.00017	SerTyr-VM(Oxidation)QQATNAILR	VMQQATNAILR		No
10000178275	100081	P06396_640	P06396	P06396100081	SEPDGFWE	640	S	E	P	D	G	F	W	E	9	607.78	2	-25	1215.56	35.036	35	0.0023	SerTyr-GFWEALGGK	GFWEALGGK		No
10000178278	100081	Q15003_171	Q15003	Q15003100081	VRVDAVHA	171	V	R	V	D	A	V	H	A	8	394.209	3	31	1182.63	30.901	21.9	0.0025	SerTyr-AVHADVYR	AVHADVYR		No
10000178280	100081	P31943_252	P31943	P31943100081	GYNDGYGF	252	G	Y	N	D	G	Y	G	F	8	554.725	2	-25	1109.45	24.068	28.8	0.0012	SerTyr-GYGFGSDR	GYGFGSDR	yes	No
10000178285	100081	P18583_353	P18583	P18583100081	EIADSSMT	353	E	I	A	D	S	S	M	T	14	626.968	3	-20	1880.9	27.458	35.5	0.00016	SerTyr-SSM(Oxidation)TRPQELPELPK	SSMTRPQELPELPK		No
10000178291	100081	P14866_285	P14866	P14866100081	DTWDYTNP	285	D	T	W	D	Y	T	N	P	19	756.017	3	-4.8	2268.05	24.499	30.1	0.0016	SerTyr-YTNPNLSGQGDPGSNPNKR	YTNPNLSGQGDPGSNPNKR		No
10000178293	100081	P04233_23	P04233	P04233100081	DQRDLISN	23	D	Q	R	D	L	I	S	N	13	867.917	2	-33	1735.83	33.459	44.4	0.00082	SerTyr-LISNNEQLPMLGR	LISNNEQLPMLGR		No
10000178295	100081	Q9H6S0_1084	Q9H6S0	Q9H6S0100081	FRVDGIPN	1084	F	R	V	D	G	I	P	N	14	895.333	2	-27	1790.67	24.229	50.5	5.1e-08	SerTyr-GIPNDSSDSEM(Oxidation)EDK	GIPNDSSDSEMEDK		No
10000178296	100081	Q6JBY9_273	Q6JBY9	Q6JBY9100081	EEVDGQHP	273	E	E	V	D	G	Q	H	P	23	908.716	3	-29	2726.15	22.902	54.8	5.1e-08	SerTyr-GQHPAQEEVPESPQTSGPEAENR	GQHPAQEEVPESPQTSGPEAENR		No
10000178297	100081	O43815_437	O43815	O43815100081	NEADSLTY	437	N	E	A	D	S	L	T	Y	10	694.817	2	-30	1389.63	28.248	40.5	0.00015	SerTyr-SLTYDIANNK	SLTYDIANNK		No
10000178298	100081	O43815_36	O43815	O43815100081	AAGDGAAA	36	A	A	G	D	G	A	A	A	9	483.234	2	-21	966.467	19.348	29.4	0.0088	SerTyr-GAAAAGAAR	GAAAAGAAR		No
10000178299	100081	O43829_244	O43829	O43829100081	TFNDGMSE	244	T	F	N	D	G	M	S	E	21	851.017	3	-24	2553.05	24.866	47.7	6.6e-08	SerTyr-GM(Oxidation)SEVKDEQTPGWTTAASDM(Oxidation)K	GMSEVKDEQTPGWTTAASDMK		No
10000178304	100081	O00429_580	O00429	O00429100081	GVGDGVQE	580	G	V	G	D	G	V	Q	E	11	747.838	2	-18	1495.68	26.932	41.7	0.0089	SerTyr-GVQEPTTGNWR	GVQEPTTGNWR		No
10000178305	100081	O43399_3	O43399	O43399100081	--MDSAGQ	3	-	-	M	D	S	A	G	Q	13	804.368	2	-24	1608.74	25.268	46.2	0.00019	SerTyr-SAGQDINLNSPNK	SAGQDINLNSPNK		No
10000178307	100081	P35269_273	P35269	P35269100081	QEVDYMSD	273	Q	E	V	D	Y	M	S	D	16	999.374	2	-26	1998.75	23.322	51.6	1.4e-07	SerTyr-YMSDGSSSSQEEPESK	YMSDGSSSSQEEPESK		No
10000178308	100081	Q9BUJ2_97	Q9BUJ2	Q9BUJ2100081	SGPDGHYA	97	S	G	P	D	G	H	Y	A	10	481.88	3	-3.8	1445.64	22.87	35.1	7.7e-05	SerTyr-GHYAM(Oxidation)DNITR	GHYAMDNITR		No
10000178312	100081	O43665_13	O43665	O43665100081	DIHDSDGS	13	D	I	H	D	S	D	G	S	13	519.562	3	-6.1	1558.69	17.553	43	0.00034	SerTyr-SDGSSSSSHQSLK	SDGSSSSSHQSLK		No
10000178313	100081	O43665_15	O43665	O43665100081	HDSDGSSS	15	H	D	S	D	G	S	S	S	11	452.215	3	5.1	1356.64	17.644	25.1	0.015	SerTyr-GSSSSSHQSLK	GSSSSSHQSLK		No
10000178314	100081	Q9Y6E0_326	Q9Y6E0	Q9Y6E0100081	AETDGQAS	326	A	E	T	D	G	Q	A	S	17	1002.43	2	-31	2004.86	35.629	45	2.3e-07	SerTyr-GQASGGSDSGDWIFTIR	GQASGGSDSGDWIFTIR		No
10000178315	100081	O14497_76	O14497	O14497100081	ELQDGAES	76	E	L	Q	D	G	A	E	S	26	773.982	3	-33	2321.95	23.883	65.8	2.4e-07	SerTyr-GAESNGGGGGGGAGSGGGPGAEPDLK	GAESNGGGGGGGAGSGGGPGAEPDLK		No
10000178316	100081	P12270_2148	P12270	P12270100081	HRTDGFAE	2148	H	R	T	D	G	F	A	E	16	629.311	3	-19	1887.93	30.6	54.2	2.5e-07	SerTyr-GFAEAIHSPQVAGVPR	GFAEAIHSPQVAGVPR		No
10000178319	100081	P33992_14	P33992	P33992100081	FYSDSFGG	14	F	Y	S	D	S	F	G	G	14	829.837	2	-23	1659.67	24.789	50	3.1e-07	SerTyr-SFGGDAQADEGQAR	SFGGDAQADEGQAR		No
10000178320	100081	P85037_81	P85037	P85037100081	VSGDSAVA	81	V	S	G	D	S	A	V	A	19	625.325	3	-28	1875.97	36.879	59.4	3.2e-07	SerTyr-SAVAGAAPALVAAAAASVR	SAVAGAAPALVAAAAASVR		No
10000178321	100081	Q8N6M0_81	Q8N6M0	Q8N6M0100081	NKIDSVAV	81	N	K	I	D	S	V	A	V	17	700.691	3	-23	2102.07	37.607	54.4	4.7e-07	SerTyr-SVAVNISNLVLENQPPR	SVAVNISNLVLENQPPR		No
10000178325	100081	Q9H444_84	Q9H444	Q9H444100081	AQIDGTLS	84	A	Q	I	D	G	T	L	S	10	701.335	2	-27	1402.67	30.437	23.9	0.0018	SerTyr-GTLSTIEFQR	GTLSTIEFQR	yes	No
10000178333	100081	Q14149_752	Q14149	Q14149100081	TETDAVFL	752	T	E	T	D	A	V	F	L	11	720.871	2	-27	1441.74	37.878	39.3	0.00067	SerTyr-AVFLLESINGK	AVFLLESINGK		No
10000178335	100081	P22681_807	P22681	P22681100081	LSLDGDPT	807	L	S	L	D	G	D	P	T	23	689.85	4	5.2	2759.4	34.866	37	3.1e-07	SerTyr-GDPTTNVTEGSQVPERPPKPFPR	GDPTTNVTEGSQVPERPPKPFPR		No
10000178336	100081	P53621_857	P53621	P53621100081	LDEDGFVE	857	L	D	E	D	G	F	V	E	16	914.914	2	-22	1829.83	34.355	44.2	1.3e-06	SerTyr-GFVEATEGLGDDALGK	GFVEATEGLGDDALGK		No
10000178338	100081	Q6P2E9_486	Q6P2E9	Q6P2E9100081	EENDSLGA	486	E	E	N	D	S	L	G	A	22	760.345	3	-33	2281.04	27.542	48.9	1.5e-06	SerTyr-SLGADGTHGAGAM(Oxidation)ESAAGVLIK	SLGADGTHGAGAMESAAGVLIK		No
10000178341	100081	Q71RC2_574	Q71RC2	Q71RC2100081	VQKDGLNQ	574	V	Q	K	D	G	L	N	Q	19	744.378	3	-22	2233.13	28.332	48.3	1.7e-06	SerTyr-GLNQTTIPVSPPSTTKPSR	GLNQTTIPVSPPSTTKPSR		No
10000178344	100081	Q9Y5S9_7	Q9Y5S9	Q9Y5S9100081	DVLDLHEA	7	D	V	L	D	L	H	E	A	21	642.776	4	13	2571.1	33.504	47.5	2.1e-06	SerTyr-LHEAGGEDFAM(Oxidation)DEDGDESIHK	LHEAGGEDFAMDEDGDESIHK		No
10000178347	100081	Q00403_208	Q00403	Q00403100081	TSVDLITT	208	T	S	V	D	L	I	T	T	10	703.828	2	-8.9	1407.66	30.02	38.8	0.0028	SerTyr-LITTGDFM(Oxidation)SR	LITTGDFMSR		No
10000178349	100081	P00519_940	P00519	P00519100081	SLVDAVNS	940	S	L	V	D	A	V	N	S	17	640.309	3	-19	1920.93	23.596	51.2	3.1e-06	SerTyr-AVNSDAAKPSQPGEGLK	AVNSDAAKPSQPGEGLK		No
10000178350	100081	Q92804_141	Q92804	Q92804100081	QQHDSYSQ	141	Q	Q	H	D	S	Y	S	Q	13	621.611	3	6.3	1864.83	22.729	41.3	3.8e-06	SerTyr-SYSQNQQSYHSQR	SYSQNQQSYHSQR		No
10000178351	100081	Q92598_548	Q92598	Q92598100081	VQTDAQQT	548	V	Q	T	D	A	Q	Q	T	19	770.001	3	-29	2310	25.135	52.2	4.8e-06	SerTyr-AQQTSQSPPSPELTSEENK	AQQTSQSPPSPELTSEENK		No
10000178353	100081	O15042_738	O15042	O15042100081	DDLDGVPL	738	D	D	L	D	G	V	P	L	12	503.917	3	-4.4	1511.75	24.704	37.2	0.0012	SerTyr-GVPLDATEDSKK	GVPLDATEDSKK		No
10000178356	100081	P49069_10	P49069	P49069100081	VATDGGER	10	V	A	T	D	G	G	E	R	18	644.982	3	-10	1934.95	24.375	59	6.3e-06	SerTyr-GGERPGVPAGSGLSASQR	GGERPGVPAGSGLSASQR		No
10000178357	100081	Q13136_219	Q13136	Q13136100081	TLTDGVLD	219	T	L	T	D	G	V	L	D	18	725.987	3	-32	2177.96	25.352	48	6.9e-06	SerTyr-GVLDINHEQENTPSTSGK	GVLDINHEQENTPSTSGK		No
10000178359	100081	Q14C86_1103	Q14C86	Q14C86100081	DLPDSASQ	1103	D	L	P	D	S	A	S	Q	16	658.297	3	-1.1	1974.89	25.627	41.1	8.5e-06	SerTyr-SASQAAHPQDSAFSYR	SASQAAHPQDSAFSYR		No
10000178360	100081	Q8WUI4_413	Q8WUI4	Q8WUI4100081	LETDGGGP	413	L	E	T	D	G	G	G	P	15	581.598	3	-18	1744.79	26.854	39.1	6e-06	SerTyr-GGGPGQVVDDGLEHR	GGGPGQVVDDGLEHR		No
10000178363	100081	P33991_133	P33991	P33991100081	LQSDGAAA	133	L	Q	S	D	G	A	A	A	17	641.965	3	-25	1925.9	31.442	56.6	9.6e-06	SerTyr-GAAAEDIVASEQSLGQK	GAAAEDIVASEQSLGQK		No
10000178372	100081	P09234_11	P09234	P09234100081	DYCDTYLT	11	D	Y	C	D	T	Y	L	T	11	509.244	3	-7.7	1527.73	25.009	29.6	2.1e-05	SerTyr-TYLTHDSPSVR	TYLTHDSPSVR		No
10000178374	100081	O75369_1477	O75369	O75369100081	DNGDGTHT	1477	D	N	G	D	G	T	H	T	20	816.701	3	-21	2450.1	26.805	55.4	1.8e-05	SerTyr-GTHTVTYTPSQEGPYM(Oxidation)VSVK	GTHTVTYTPSQEGPYMVSVK		No
10000178377	100081	Q8N163_293	Q8N163	Q8N163100081	AAPDAGAE	293	A	A	P	D	A	G	A	E	17	965.418	2	-22	1930.84	26.113	39.6	1.7e-05	SerTyr-AGAEPITADSDPAYSSK	AGAEPITADSDPAYSSK		No
10000178379	100081	Q8N1G4_526	Q8N1G4	Q8N1G4100081	TEADAVSG	526	T	E	A	D	A	V	S	G	17	630.63	3	-27	1891.89	26.971	57.5	2.1e-05	SerTyr-AVSGQLPDPTTNPSAGK	AVSGQLPDPTTNPSAGK		No
10000178382	100081	Q96PK2_1524	Q96PK2	Q96PK2100081	DLCDGSAN	1524	D	L	C	D	G	S	A	N	20	829.733	3	-15	2489.2	33.188	43.2	2.4e-05	SerTyr-GSANQLQQLQSQLAHQTEQK	GSANQLQQLQSQLAHQTEQK		No
10000178385	100081	O60684_70	O60684	O60684100081	LLMDSYVS	70	L	L	M	D	S	Y	V	S	14	868.898	2	-25	1737.8	27.609	42.4	2.5e-05	SerTyr-SYVSSTTGESVITR	SYVSSTTGESVITR		No
10000178386	100081	Q16643_478	Q16643	Q16643100081	SLIDLWPG	478	S	L	I	D	L	W	P	G	17	673.637	3	-29	2020.91	30.931	43.6	2.5e-05	SerTyr-LWPGNGEGASTLQGEPR	LWPGNGEGASTLQGEPR		No
10000178389	100081	Q9H4A3_653	Q9H4A3	Q9H4A3100081	VLSDGTVD	653	V	L	S	D	G	T	V	D	16	932.399	2	-24	1864.8	26.865	53.2	2.7e-05	SerTyr-GTVDSGQGSSVFTESR	GTVDSGQGSSVFTESR		No
10000178395	100081	Q02750_17	Q02750	Q02750100081	PAPDGSAV	17	P	A	P	D	G	S	A	V	19	709.657	3	-30	2128.97	28.886	48.3	3.3e-05	SerTyr-GSAVNGTSSAETNLEALQK	GSAVNGTSSAETNLEALQK		No
10000178397	100081	P08047_200	P08047	P08047100081	VQQDGSGQ	200	V	Q	Q	D	G	S	G	Q	19	753.381	3	-26	2260.14	31.695	56.4	3.8e-05	SerTyr-GSGQIQIIPGANQQIITNR	GSGQIQIIPGANQQIITNR		No
10000178400	100081	Q14161_626	Q14161	Q14161100081	LVPDTAEP	626	L	V	P	D	T	A	E	P	20	789.707	3	-33	2369.12	29.94	47.1	4.5e-05	SerTyr-TAEPHVAPSPTLPSTEDVIR	TAEPHVAPSPTLPSTEDVIR		No
10000178402	100081	Q9Y6W5_412	Q9Y6W5	Q9Y6W5100081	TGADGQPA	412	T	G	A	D	G	Q	P	A	16	632.989	3	-29	1898.97	25.824	40.5	5.1e-05	SerTyr-GQPAIPPPLSDTTKPK	GQPAIPPPLSDTTKPK		No
10000178405	100081	Q96P70_964	Q96P70	Q96P70100081	EEEDGLAG	964	E	E	E	D	G	L	A	G	15	868.946	2	-34	1737.89	43.495	45.5	5.5e-05	SerTyr-GLAGQLLSDILATSK	GLAGQLLSDILATSK		No
10000178408	100081	Q96FS4_815	Q96FS4	Q96FS4100081	CLQDGGSP	815	C	L	Q	D	G	G	S	P	14	794.847	2	-23	1589.69	25.785	56.7	6.9e-05	SerTyr-GGSPPGPGDLAEER	GGSPPGPGDLAEER		No
10000178409	100081	Q14151_262	Q14151	Q14151100081	DLFDSAHP	262	D	L	F	D	S	A	H	P	23	655.05	4	5.0	2620.2	36.852	37.3	2.2e-05	SerTyr-SAHPEEGDLDLASESTAHAQSSK	SAHPEEGDLDLASESTAHAQSSK	yes	No
10000178411	100081	P41250_57	P41250	P41250100081	SSMDGAGA	57	S	S	M	D	G	A	G	A	12	716.852	2	-32	1433.7	29.641	41.5	7e-05	SerTyr-GAGAEEVLAPLR	GAGAEEVLAPLR		No
10000178423	100081	Q02447_531	Q02447	Q02447100081	NSIDSAGI	531	N	S	I	D	S	A	G	I	19	733.335	3	-25	2200.01	26.681	45.2	0.00015	SerTyr-SAGIQLHPGENADSPADIR	SAGIQLHPGENADSPADIR		No
10000178424	100081	Q96QC0_367	Q96QC0	Q96QC0100081	ELMDTASL	367	E	L	M	D	T	A	S	L	25	938.442	3	-30	2815.33	30.313	41.7	0.00015	SerTyr-TASLEPGALDAKPVESPGDPNQLTR	TASLEPGALDAKPVESPGDPNQLTR		No
10000178425	100081	O75934_15	O75934	O75934100081	VVVDALPY	15	V	V	V	D	A	L	P	Y	15	966.93	2	-31	1933.86	33.994	45.4	0.00017	SerTyr-ALPYFDQGYEAPGVR	ALPYFDQGYEAPGVR		No
10000178426	100081	Q86V81_94	Q86V81	Q86V81100081	DLFDSGFG	94	D	L	F	D	S	G	F	G	14	715.809	2	-31	1431.62	24.666	47.6	0.00017	SerTyr-SGFGGGAGVETGGK	SGFGGGAGVETGGK		No
10000178427	100081	Q13367_844	Q13367	Q13367100081	TLTDSTLV	844	T	L	T	D	S	T	L	V	16	909.977	2	-27	1819.95	36.133	39.4	0.00013	SerTyr-STLVPSLLSPVSGVGR	STLVPSLLSPVSGVGR		No
10000178428	100081	Q8IZ40_392	Q8IZ40	Q8IZ40100081	AEQDGAPG	392	A	E	Q	D	G	A	P	G	13	774.34	2	-28	1548.68	24.545	52.4	0.00017	SerTyr-GAPGAPVPM(Oxidation)EEAR	GAPGAPVPMEEAR		No
10000178429	100081	O75427_359	O75427	O75427100081	DFIDSHVP	359	D	F	I	D	S	H	V	P	10	468.87	3	-4.4	1406.61	20.924	39.2	0.00012	SerTyr-SHVPGEDEER	SHVPGEDEER		No
10000178431	100081	Q9UKV3_664	Q9UKV3	Q9UKV3100081	VSRDSSTS	664	V	S	R	D	S	S	T	S	9	627.269	2	-18	1254.54	20.798	24.6	0.0072	SerTyr-SSTSYTETK	SSTSYTETK		No
10000178432	100081	Q13492_277	Q13492	Q13492100081	SLLDALEQ	277	S	L	L	D	A	L	E	Q	12	515.93	3	-9.7	1547.79	32.896	41	0.0002	SerTyr-ALEQHLASLEGK	ALEQHLASLEGK		No
10000178434	100081	P16333_89	P16333	P16333100081	SVPDSASP	89	S	V	P	D	S	A	S	P	15	900.375	2	-17	1800.75	27.361	42	0.00021	SerTyr-SASPADDSFVDPGER	SASPADDSFVDPGER		No
10000178438	100081	O95402_408	O95402	O95402100081	VNLDGQVA	408	V	N	L	D	G	Q	V	A	12	487.595	3	-10	1462.79	23.648	47.1	0.00025	SerTyr-GQVAEAGVKPVR	GQVAEAGVKPVR		No
10000178439	100081	Q14498_332	Q14498	Q14498100081	ERTDASSA	332	E	R	T	D	A	S	S	A	15	932.39	2	-27	1864.78	32.7	39.6	0.00022	SerTyr-ASSASSFLDSDELER	ASSASSFLDSDELER		No
10000178443	100081	A6NMY6_17	A6NMY6	A6NMY6100081	LEGDHSTP	17	L	E	G	D	H	S	T	P	12	494.241	3	2.0	1482.72	22.122	38.9	0.00019	SerTyr-HSTPPSAYGSVK	HSTPPSAYGSVK	yes	No
10000178446	100081	Q15042_253	Q15042	Q15042100081	PDIDALVG	253	P	D	I	D	A	L	V	G	14	791.891	2	-23	1583.78	33.588	44.6	0.00031	SerTyr-ALVGGEVGGLEFGK	ALVGGEVGGLEFGK		No
10000178447	100081	O95433_19	O95433	O95433100081	ERADATNV	19	E	R	A	D	A	T	N	V	12	593.278	3	9.0	1779.83	34.399	39	0.00021	SerTyr-ATNVNNWHWTER	ATNVNNWHWTER		No
10000178449	100081	Q9C0C9_1226	Q9C0C9	Q9C0C9100081	TAPDASVP	1226	T	A	P	D	A	S	V	P	10	420.574	3	6.2	1261.72	22.297	29.4	0.0015	SerTyr-ASVPPSVKPK	ASVPPSVKPK		No
10000178451	100081	Q13422_368	Q13422	Q13422100081	SAQDSAVE	368	S	A	Q	D	S	A	V	E	11	718.878	2	-36	1437.76	36.507	48.9	0.00034	SerTyr-SAVENLLLLSK	SAVENLLLLSK		No
10000178456	100081	O60244_995	O60244	O60244100081	DMMDSLIS	995	D	M	M	D	S	L	I	S	17	728.37	3	-25	2185.11	33.866	46.8	0.00039	SerTyr-SLISQLQPPPQQQPFPK	SLISQLQPPPQQQPFPK		No
10000178458	100081	Q9UEW8_434	Q9UEW8	Q9UEW8100081	SVHDSQGP	434	S	V	H	D	S	Q	G	P	12	799.338	2	-12	1598.68	22.954	50.2	0.00039	SerTyr-SQGPPNANEDYR	SQGPPNANEDYR		No
10000178459	100081	Q6PKG0_173	Q6PKG0	Q6PKG0100081	DFGDAINW	173	D	F	G	D	A	I	N	W	13	561.958	3	6.0	1685.87	14.386	42.2	0.00041	SerTyr-AINWPTPGEIAHK	AINWPTPGEIAHK		No
10000178461	100081	O94888_401	O94888	O94888100081	EKADGVVE	401	E	K	A	D	G	V	V	E	12	717.349	2	-26	1434.7	28.824	46.5	0.00045	SerTyr-GVVEGIDVNGPK	GVVEGIDVNGPK		No
10000178464	100081	Q8WYA6_67	Q8WYA6	Q8WYA6100081	IDRDGEEE	67	I	D	R	D	G	E	E	E	18	781.318	3	-28	2343.95	24.242	36	9.6e-05	SerTyr-GEEEEEEEEPLDESSVKK	GEEEEEEEEPLDESSVKK		No
10000178466	100081	P54578_228	P54578	P54578100081	KETDSSSA	228	K	E	T	D	S	S	S	A	11	622.278	2	-25	1244.56	18.645	39.3	0.0004	SerTyr-SSSASAATPSK	SSSASAATPSK		No
10000178477	100081	Q8WWI1_963	Q8WWI1	Q8WWI1100081	PSPDASQL	963	P	S	P	D	A	S	Q	L	12	728.842	2	-34	1457.68	30.752	47.6	0.00067	SerTyr-ASQLASSLSSQK	ASQLASSLSSQK		No
10000178486	100081	Q9P107_473	Q9P107	Q9P107100081	DLGDGLEN	473	D	L	G	D	G	L	E	N	12	713.33	2	-34	1426.66	30.15	40.9	0.00074	SerTyr-GLENGLGSPFGK	GLENGLGSPFGK		No
10000178487	100081	Q92925_211	Q92925	Q92925100081	AEGDSAGT	211	A	E	G	D	S	A	G	T	16	797.851	2	-24	1595.7	21.379	36.5	0.00018	SerTyr-SAGTAGTPGGTPAGDK	SAGTAGTPGGTPAGDK		No
10000178489	100081	P30260_244	P30260	P30260100081	ISPDTVPL	244	I	S	P	D	T	V	P	L	13	762.4	2	-25	1524.8	31.165	48	0.0009	SerTyr-TVPLGTGTSILSK	TVPLGTGTSILSK		No
10000178492	100081	O60508_205	O60508	O60508100081	DEKDVAKP	205	D	E	K	D	V	A	K	P	10	465.559	3	-13	1396.68	18.717	30.2	0.0087	SerTyr-VAKPSEEEQK	VAKPSEEEQK		No
10000178494	100081	O60508_191	O60508	O60508100081	SNIDGFLG	191	S	N	I	D	G	F	L	G	8	563.271	2	-34	1126.54	33.874	26.5	0.018	SerTyr-GFLGPWAK	GFLGPWAK		No
10000178497	100081	P09496_93	P09496	P09496100081	GPTDSYAA	93	G	P	T	D	S	Y	A	A	10	680.312	2	-27	1360.62	27.422	37.1	0.0003	SerTyr-SYAAISQVDR	SYAAISQVDR		No
10000178499	100081	P43686_298	P43686	P43686100081	NQMDGFDQ	298	N	Q	M	D	G	F	D	Q	9	635.792	2	-23	1271.58	26.386	39	0.00073	SerTyr-GFDQNVNVK	GFDQNVNVK		No
10000178500	100081	Q8WV28_178	Q8WV28	Q8WV28100081	DEADYVVP	178	D	E	A	D	Y	V	V	P	25	1031.43	3	-39	3094.3	30.387	31.4	2.9e-05	SerTyr-YVVPVEDNDENYIHPTESSSPPPEK	YVVPVEDNDENYIHPTESSSPPPEK		No
10000178501	100081	Q96PU8_75	Q96PU8	Q96PU8100081	ELPDAVGP	75	E	L	P	D	A	V	G	P	11	716.371	2	-35	1432.74	29.788	44.1	0.0012	SerTyr-AVGPIVQLQEK	AVGPIVQLQEK		No
10000178506	100081	Q6FIF0_127	Q6FIF0	Q6FIF0100081	SVSDTAQQ	127	S	V	S	D	T	A	Q	Q	11	741.816	2	-31	1483.63	19.662	43.8	0.0016	SerTyr-TAQQPSEEQSK	TAQQPSEEQSK		No
10000178507	100081	Q9Y2I7_1608	Q9Y2I7	Q9Y2I7100081	DVFDGHLL	1608	D	V	F	D	G	H	L	L	12	497.919	3	-0.47	1493.76	26.398	37.6	0.0006	SerTyr-GHLLGSTDSQVK	GHLLGSTDSQVK		No
10000178509	100081	Q9BQ87_163	Q9BQ87	Q9BQ87100081	MEIDGDVE	163	M	E	I	D	G	D	V	E	9	609.788	2	-25	1219.58	24.895	37.8	0.00076	SerTyr-GDVEIPPNK	GDVEIPPNK	yes	No
10000178511	100081	Q9Y3C0_5	Q9Y3C0	Q9Y3C0100081	MDEDGLPL	5	M	D	E	D	G	L	P	L	13	776.385	2	-30	1552.77	35.483	44.5	0.002	SerTyr-GLPLMGSGIDLTK	GLPLMGSGIDLTK		No
10000178512	100081	Q96EV2_999	Q96EV2	Q96EV2100081	GESDGFFH	999	G	E	S	D	G	F	F	H	11	517.242	3	-4.3	1551.73	31.807	34	0.00015	SerTyr-GFFHPEGQPQR	GFFHPEGQPQR		No
10000178513	100081	Q9Y4X4_74	Q9Y4X4	Q9Y4X4100081	LSVDHFQT	74	L	S	V	D	H	F	Q	T	15	669.657	3	-13	2008.97	32.378	44.5	0.002	SerTyr-HFQTQTEPVDLSINK	HFQTQTEPVDLSINK		No
10000178516	100081	Q5T6F2_855	Q5T6F2	Q5T6F2100081	ASRDGSLA	855	A	S	R	D	G	S	L	A	14	841.888	2	-20	1683.78	27.181	37.5	0.00087	SerTyr-GSLANNPYPGDVTK	GSLANNPYPGDVTK		No
10000178519	100081	Q9Y2X7_419	Q9Y2X7	Q9Y2X7100081	DLSDGAVT	419	D	L	S	D	G	A	V	T	12	807.409	2	-20	1614.82	36.007	44.8	0.0029	SerTyr-GAVTLQEYLELK	GAVTLQEYLELK		No
10000178525	100081	Q9NZ52_518	Q9NZ52	Q9NZ52100081	HHLDALDQ	518	H	H	L	D	A	L	D	Q	10	690.337	2	-28	1380.67	34.915	44.5	0.0041	SerTyr-ALDQLLEEAK	ALDQLLEEAK		No
10000178526	100081	O95391_8	O95391	O95391100081	TVVDAVNA	8	T	V	V	D	A	V	N	A	11	632.818	2	-20	1265.64	24.543	42.5	0.0045	SerTyr-AVNAAPLSGSK	AVNAAPLSGSK		No
10000178530	100081	Q96GM8_8	Q96GM8	Q96GM8100081	DSDDGAVS	8	D	S	D	D	G	A	V	S	15	762.345	2	-33	1524.69	23.391	42	0.005	SerTyr-GAVSAPAASDGGVSK	GAVSAPAASDGGVSK		No
10000178532	100081	Q6DN90_235	Q6DN90	Q6DN90100081	DFADAITE	235	D	F	A	D	A	I	T	E	11	751.341	2	-28	1502.68	36.986	48	0.0051	SerTyr-AITELEDAFSR	AITELEDAFSR		No
10000178533	100081	Q15459_504	Q15459	Q15459100081	VTWDGHSG	504	V	T	W	D	G	H	S	G	8	526.746	2	26	1053.49	22.283	32	0.009	SerTyr-GHSGSMAR	GHSGSMAR		No
10000178535	100081	Q04637_415	Q04637	Q04637100081	PAVDLSPV	415	P	A	V	D	L	S	P	V	12	782.366	2	-19	1564.73	25.884	46.5	0.0057	SerTyr-LSPVSEPEEQAK	LSPVSEPEEQAK		No
10000178536	100081	Q9HCE5_30	Q9HCE5	Q9HCE5100081	ESADSIGA	30	E	S	A	D	S	I	G	A	9	569.791	2	-31	1139.58	29.16	39.4	0.0046	SerTyr-SIGAVLNSK	SIGAVLNSK		No
10000178537	100081	Q5T4S7_2904	Q5T4S7	Q5T4S7100081	SAVDSVAG	2904	S	A	V	D	S	V	A	G	11	445.878	3	-6.0	1337.64	21.393	37.5	0.0021	SerTyr-SVAGEHSVSGR	SVAGEHSVSGR		No
10000178538	100081	Q9UPN9_830	Q9UPN9	Q9UPN9100081	SELDALAS	830	S	E	L	D	A	L	A	S	10	444.567	3	-7.5	1333.7	28.514	35.5	0.00089	SerTyr-ALASLENHVK	ALASLENHVK		No
10000178539	100081	O00566_546	O00566	O00566100081	SVSDAALL	546	S	V	S	D	A	A	L	L	12	521.281	3	-12	1563.84	29.48	39.5	0.005	SerTyr-AALLAPEEIKEK	AALLAPEEIKEK		No
10000178543	100081	O94973_691	O94973	O94973100081	VFSDSASV	691	V	F	S	D	S	A	S	V	18	679.981	3	-29	2039.94	30.804	45.9	0.0066	SerTyr-SASVVAPLAPGSEDNFAR	SASVVAPLAPGSEDNFAR		No
10000178546	100081	Q99615_9	Q99615	Q99615100081	AECDVVMA	9	A	E	C	D	V	V	M	A	18	761.021	3	-23	2283.06	28.158	35	0.0008	SerTyr-VVM(Oxidation)AATEPELLDDQEAKR	VVMAATEPELLDDQEAKR		No
10000178547	100081	Q15653_160	Q15653	Q15653100081	EAPDTYLA	160	E	A	P	D	T	Y	L	A	9	635.792	2	-23	1271.58	25.143	35.5	0.0011	SerTyr-TYLAQGPDR	TYLAQGPDR		No
10000178555	100081	Q13620_44	Q13620	Q13620100081	SATDGNTS	44	S	A	T	D	G	N	T	S	12	706.316	2	-32	1412.63	20.64	35.9	0.0016	SerTyr-GNTSTTPPTSAK	GNTSTTPPTSAK		No
10000178557	100081	P49321_33	P49321	P49321100081	TSADKVES	33	T	S	A	D	K	V	E	S	12	523.92	3	-12	1571.76	25.75	38.6	0.0051	SerTyr-KVESLDVDSEAK	KVESLDVDSEAK		No
10000178558	100081	Q96PZ0_23	Q96PZ0	Q96PZ0100081	EDNDSGVP	23	E	D	N	D	S	G	V	P	10	441.897	3	-1.8	1325.69	21.081	34.8	0.0011	SerTyr-SGVPVEETKK	SGVPVEETKK		No
10000178560	100081	Q13263_686	Q13263	Q13263100081	LSLDGADS	686	L	S	L	D	G	A	D	S	10	577.772	2	-27	1155.54	21.62	35.3	0.0015	SerTyr-GADSTGVVAK	GADSTGVVAK		No
10000178561	100081	O00499_302	O00499	O00499100081	SPPDGSPA	302	S	P	P	D	G	S	P	A	10	624.793	2	-35	1249.59	24.037	38.6	0.0063	SerTyr-GSPAATPEIR	GSPAATPEIR		No
10000178563	100081	Q9H3P2_300	Q9H3P2	Q9H3P2100081	ATPDYAAG	300	A	T	P	D	Y	A	A	G	10	644.312	2	-32	1288.62	26.031	35	0.0014	SerTyr-YAAGLVSTQK	YAAGLVSTQK		No
10000178564	100081	P45974_783	P45974	P45974100081	SAADSISE	783	S	A	A	D	S	I	S	E	11	675.335	2	-23	1350.67	26.314	35.2	0.0017	SerTyr-SISESVPVGPK	SISESVPVGPK		No
10000178567	100081	Q9BYJ9_165	Q9BYJ9	Q9BYJ9100081	TVVDGQPG	165	T	V	V	D	G	Q	P	G	12	762.356	2	-5.5	1524.71	24	40.2	0.017	SerTyr-GQPGFHSDTLSK	GQPGFHSDTLSK		No
10000178571	100081	P07814_930	P07814	P07814100081	DQVDIAVQ	930	D	Q	V	D	I	A	V	Q	10	702.89	2	-27	1405.78	37.251	46	0.019	SerTyr-IAVQELLQLK	IAVQELLQLK		No
10000178572	100081	Q9BY77_235	Q9BY77	Q9BY77100081	VQNDAYTA	235	V	Q	N	D	A	Y	T	A	12	748.864	2	-36	1497.73	30.024	34.6	0.002	SerTyr-AYTAPALPSSIR	AYTAPALPSSIR		No
10000178575	100081	O75367_173	O75367	O75367100081	ASADSTTE	173	A	S	A	D	S	T	T	E	17	981.452	2	-18	1962.9	30.282	33	0.0012	SerTyr-STTEGTPADGFTVLSTK	STTEGTPADGFTVLSTK		No
10000178576	100081	Q7Z6B0_100	Q7Z6B0	Q7Z6B0100081	THLDISLF	100	T	H	L	D	I	S	L	F	12	791.899	2	-28	1583.8	38.231	35.7	0.004	SerTyr-ISLFPLGLTDEK	ISLFPLGLTDEK		No
10000178578	100081	P22102_444	P22102	P22102100081	SGVDIAAG	444	S	G	V	D	I	A	A	G	9	591.799	2	-23	1183.6	25.658	38.1	0.012	SerTyr-IAAGNM(Oxidation)LVK	IAAGNMLVK		No
10000178581	100081	P21333_1049	P21333	P21333100081	VTYDGVPV	1049	V	T	Y	D	G	V	P	V	21	775.731	3	-30	2327.19	33.67	29.5	0.00041	SerTyr-GVPVPGSPFPLEAVAPTKPSK	GVPVPGSPFPLEAVAPTKPSK		No
10000178583	100081	Q8NHV4_435	Q8NHV4	Q8NHV4100081	DGFDFLPQ	435	D	G	F	D	F	L	P	Q	12	832.914	2	-35	1665.83	37.983	35.1	0.0047	SerTyr-FLPQLNSVFPPR	FLPQLNSVFPPR		No
10000178584	100081	Q9UHB9_538	Q9UHB9	Q9UHB9100081	DANDAHQT	538	D	A	N	D	A	H	Q	T	12	518.245	3	-1.4	1554.74	18.682	37.5	0.014	SerTyr-AHQTETSSSQVK	AHQTETSSSQVK		No
10000178587	100081	P36954_5	P36954	P36954100081	MEPDGTYE	5	M	E	P	D	G	T	Y	E	11	723.335	2	-30	1446.67	30.402	33	0.0024	SerTyr-GTYEPGFVGIR	GTYEPGFVGIR		No
10000178590	100081	Q7Z460_1219	Q7Z460	Q7Z460100081	VSRDGGAA	1219	V	S	R	D	G	G	A	A	11	612.275	2	-19	1224.55	20.073	34.3	0.0048	SerTyr-GGAASPATEGR	GGAASPATEGR		No
10000178591	100081	Q9UPN6_776	Q9UPN6	Q9UPN6100081	HLIDHQIS	776	H	L	I	D	H	Q	I	S	10	460.221	3	9.5	1380.66	21.818	32.4	0.0023	SerTyr-HQISSGENTR	HQISSGENTR		No
10000178595	100081	Q96T37_751	Q96T37	Q96T37100081	DRSDGSAP	751	D	R	S	D	G	S	A	P	12	665.796	2	-21	1331.59	19.303	35.2	0.0083	SerTyr-GSAPSTSTASSK	GSAPSTSTASSK		No
10000178602	100081	Q00653_11	Q00653	Q00653100081	PGLDGIIE	11	P	G	L	D	G	I	I	E	9	675.296	2	-30	1350.59	32.049	36	0.014	SerTyr-GIIEYDDFK	GIIEYDDFK		No
10000178603	100081	Q9UBI9_324	Q9UBI9	Q9UBI9100081	AHFDYSPA	324	A	H	F	D	Y	S	P	A	10	440.891	3	-8.1	1322.67	27.132	30.8	0.0015	SerTyr-YSPAGLAVHR	YSPAGLAVHR		No
10000178604	100081	Q86UX7_345	Q86UX7	Q86UX7100081	DVLDSLTT	345	D	V	L	D	S	L	T	T	9	626.34	2	-7.7	1252.68	32.052	33.1	0.0046	SerTyr-SLTTIPELK	SLTTIPELK		No
10000178605	100081	P51991_116	P51991	P51991100081	SREDSVKP	116	S	R	E	D	S	V	K	P	11	462.937	3	16	1388.81	43.868	34.2	0.0077	SerTyr-SVKPGAHLTVK	SVKPGAHLTVK		No
10000178606	100081	Q99459_392	Q99459	Q99459100081	HESDFSGV	392	H	E	S	D	F	S	G	V	8	571.274	2	-20	1142.55	26.022	31.9	0.003	SerTyr-FSGVTPQR	FSGVTPQR		No
10000178613	100081	Q12802_906	Q12802	Q12802100081	LALDSVLT	906	L	A	L	D	S	V	L	T	8	556.768	2	-17	1113.54	24.176	33.5	0.0084	SerTyr-SVLTEEGK	SVLTEEGK		No
10000178614	100081	Q12912_182	Q12912	Q12912100081	ASGDSVVS	182	A	S	G	D	S	V	V	S	12	738.899	2	-27	1477.8	30.152	33.6	0.0089	SerTyr-SVVSPLPVTTVK	SVVSPLPVTTVK		No
10000178615	100081	Q99986_232	Q99986	Q99986100081	TSIDAHNG	232	T	S	I	D	A	H	N	G	9	386.863	3	8.4	1160.59	20.359	29.2	0.0015	SerTyr-AHNGVAPSR	AHNGVAPSR		No
10000178616	100081	P35579_1154	P35579	P35579100081	DTLDSTAA	1154	D	T	L	D	S	T	A	A	9	627.302	2	-12	1254.6	23.789	35.1	0.02	SerTyr-STAAQQELR	STAAQQELR		No
10000178618	100081	Q14566_275	Q14566	Q14566100081	SGVDGYET	275	S	G	V	D	G	Y	E	T	8	587.75	2	-38	1175.5	24.579	31.3	0.0041	SerTyr-GYETEGIR	GYETEGIR		No
10000178619	100081	P55011_67	P55011	P55011100081	AAGDGLGR	67	A	A	G	D	G	L	G	R	14	558.292	3	-9.6	1674.88	25.609	29.4	0.0021	SerTyr-GLGRPLGPTPSQSR	GLGRPLGPTPSQSR		No
10000178621	100081	P63313_7	P63313	P63313100081	DKPDMGEI	7	D	K	P	D	M	G	E	I	9	624.268	2	-27	1248.54	31.206	31.6	0.0064	SerTyr-MGEIASFDK	MGEIASFDK		No
10000178622	100081	Q96IZ7_239	Q96IZ7	Q96IZ7100081	IESDSFVQ	239	I	E	S	D	S	F	V	Q	8	631.797	2	-24	1263.59	29.774	32.9	0.011	SerTyr-SFVQQTFR	SFVQQTFR		No
10000178623	100081	Q9UQ35_1150	Q9UQ35	Q9UQ35100081	PTVDSNSL	1150	P	T	V	D	S	N	S	L	9	606.293	2	-19	1212.59	25.174	33.1	0.014	SerTyr-SNSLLGQSR	SNSLLGQSR		No
10000178624	100081	Q9H098_6	Q9H098	Q9H098100081	AEPDYIED	6	A	E	P	D	Y	I	E	D	14	660.654	3	-12	1981.96	28.978	28	0.0017	SerTyr-YIEDDNPELIRPQK	YIEDDNPELIRPQK		No
10000178629	100081	O75400_134	O75400	O75400100081	NSMDVAAG	134	N	S	M	D	V	A	A	G	10	541.763	2	-27	1083.53	18.15	32.9	0.019	SerTyr-VAAGTASGAK	VAAGTASGAK		No
10000178630	100081	Q7Z4V5_31	Q7Z4V5	Q7Z4V5100081	DIADGAVK	31	D	I	A	D	G	A	V	K	9	386.55	3	4.8	1159.65	20.188	28.5	0.0032	SerTyr-GAVKPPPNK	GAVKPPPNK		No
10000178631	100081	Q9Y5K8_118	Q9Y5K8	Q9Y5K8100081	EGTDSYEL	118	E	G	T	D	S	Y	E	L	9	630.302	2	-24	1260.6	29.406	29.7	0.0057	SerTyr-SYELTGLAR	SYELTGLAR		No
10000178634	100081	Q9Y6A5_22	Q9Y6A5	Q9Y6A5100081	ENCDFLFS	22	E	N	C	D	F	L	F	S	11	750.359	2	-29	1500.72	35.232	31	0.01	SerTyr-FLFSPPEVTGR	FLFSPPEVTGR		No
10000178635	100081	Q06413_106	Q06413	Q06413100081	DADDSVGH	106	D	A	D	D	S	V	G	H	11	474.543	3	-3.2	1423.63	19.819	30.4	0.0081	SerTyr-SVGHSPESEDK	SVGHSPESEDK		No
10000178636	100081	Q3LXA3_363	Q3LXA3	Q3LXA3100081	EAPDSTAA	363	E	A	P	D	S	T	A	A	10	543.743	2	-26	1087.49	15.071	30.9	0.01	SerTyr-STAAGGSASK	STAAGGSASK		No
10000178638	100081	Q9UBP0_471	Q9UBP0	Q9UBP0100081	IEFDGVQS	471	I	E	F	D	G	V	Q	S	9	577.745	2	-21	1155.49	20.435	31.2	0.014	SerTyr-GVQSAGDDR	GVQSAGDDR		No
10000178639	100081	Q92785_116	Q92785	Q92785100081	ISQDGSSL	116	I	S	Q	D	G	S	S	L	9	598.307	2	-22	1196.61	34.437	30.9	0.012	SerTyr-GSSLEALLR	GSSLEALLR		No
10000178640	100081	Q14686_1462	Q14686	Q14686100081	SKKDGQPS	1462	S	K	K	D	G	Q	P	S	16	663.639	3	-26	1990.92	24.766	29.6	0.0072	SerTyr-GQPSDPNKLPSVEENK	GQPSDPNKLPSVEENK		No
10000178644	100081	P30519_252	P30519	P30519100081	TLEDGFPV	252	T	L	E	D	G	F	P	V	8	553.766	2	-0.65	1107.53	23.971	29.1	0.0074	SerTyr-GFPVHDGK	GFPVHDGK		No
10000178647	100081	Q99829_465	Q99829	Q99829100081	LDADGGPL	465	L	D	A	D	G	G	P	L	7	494.258	2	8.7	988.516	23.965	26.6	0.0034	SerTyr-GGPLHTR	GGPLHTR		No
10000178648	100081	P46777_169	P46777	P46777100081	GAVDGGLS	169	G	A	V	D	G	G	L	S	10	416.219	3	-0.46	1248.66	25.909	26.5	0.0035	SerTyr-GGLSIPHSTK	GGLSIPHSTK		No
10000178651	100081	P15170_40	P15170	P15170100081	SLGDGRPP	40	S	L	G	D	G	R	P	P	22	573.1	5	74	2865.5	41.641	26.6	0.0039	SerTyr-GRPPEESAHEM(Oxidation)M(Oxidation)EEEEEIPKPK	GRPPEESAHEMMEEEEEIPKPK		No
10000178652	100081	P23193_125	P23193	P23193100081	NARDTYVS	125	N	A	R	D	T	Y	V	S	8	603.772	2	-35	1207.54	27.999	29.5	0.014	SerTyr-TYVSSFPR	TYVSSFPR		No
10000178653	100081	O15234_390	O15234	O15234100081	AAPDAAPP	390	A	A	P	D	A	A	P	P	12	513.264	3	-15	1539.79	23.232	26.4	0.0041	SerTyr-AAPPPPDRPIEK	AAPPPPDRPIEK		No
10000178660	100081	Q92917_99	Q92917	Q92917100081	ALADGVVS	99	A	L	A	D	G	V	V	S	8	519.269	2	-30	1038.54	23.111	28.2	0.019	SerTyr-GVVSQAVK	GVVSQAVK		No
10000178662	100081	Q8WXI9_345	Q8WXI9	Q8WXI9100081	AMTDAANS	345	A	M	T	D	A	A	N	S	9	541.25	2	-32	1082.5	15.19	24.3	0.0039	SerTyr-AANSQAAAK	AANSQAAAK		No
10000178664	100081	Q7Z7A1_802	Q7Z7A1	Q7Z7A1100081	HVVDGLVR	802	H	V	V	D	G	L	V	R	11	482.924	3	-9.2	1448.77	25.856	25.6	0.0068	SerTyr-GLVRPEEVAAR	GLVRPEEVAAR		No
10000178665	100081	Q5TZA2_579	Q5TZA2	Q5TZA2100081	DKTDGAMQ	579	D	K	T	D	G	A	M	Q	11	493.88	3	-2.5	1481.64	18.426	24.2	0.0039	SerTyr-GAM(Oxidation)QAHEDAQR	GAMQAHEDAQR		No	TRUE
10000178666	100081	Q99848_212	Q99848	Q99848100081	DKLDFLEG	212	D	K	L	D	F	L	E	G	12	551.28	3	-12	1653.84	28.099	25.1	0.0064	SerTyr-FLEGDQKPLAQR	FLEGDQKPLAQR		No
10000178667	100081	P50991_269	P50991	P50991100081	VVSDYAQM	269	V	V	S	D	Y	A	Q	M	6	525.212	2	-19	1050.42	19.021	24.9	0.006	SerTyr-YAQM(Oxidation)DR	YAQMDR		No
10000178668	100081	Q7Z3T8_535	Q7Z3T8	Q7Z3T8100081	AELDAFLT	535	A	E	L	D	A	F	L	T	14	640.623	3	-63	1921.87	34.854	26.7	0.016	SerTyr-AFLTEQYLQTTNIK	AFLTEQYLQTTNIK		No
10000178669	100081	O75475_31	O75475	O75475100081	EVPDGAVK	31	E	V	P	D	G	A	V	K	9	387.884	3	8.9	1163.65	21.017	25.1	0.0082	SerTyr-GAVKPPTNK	GAVKPPTNK		No
10000178671	100081	Q8NDC0_10	Q8NDC0	Q8NDC0100081	SLADALPE	10	S	L	A	D	A	L	P	E	9	400.541	3	2.1	1201.62	22.403	26.9	0.019	SerTyr-ALPEHSPAK	ALPEHSPAK		No
10000178674	100081	Q5JTV8_227	Q5JTV8	Q5JTV8100081	DDQDSSHS	227	D	D	Q	D	S	S	H	S	10	428.217	3	8.2	1284.65	20.067	24.7	0.0078	SerTyr-SSHSSVTTVK	SSHSSVTTVK		No
10000178676	100081	O76003_102	O76003	O76003100081	DRLDGAHA	102	D	R	L	D	G	A	H	A	9	391.871	3	7.3	1175.61	22.018	24.9	0.013	SerTyr-GAHAPELTK	GAHAPELTK		No
10000178684	100087	Q09666_738	Q09666	Q09666100087	DAPDVDVH	738	D	A	P	D	V	D	V	H	11	388.952	4	22	1555.81	30.411	36	6.5e-05	SerTyr-VDVHGPDWHLK	VDVHGPDWHLK		No
10000178688	100087	Q09666_3465	Q09666	Q09666100087	PDVDVHGP	3465	P	D	V	D	V	H	G	P	9	439.224	3	11	1317.67	29.634	27.3	0.00031	SerTyr-VHGPDWNLK	VHGPDWNLK		No
10000178698	100087	Q09666_2883	Q09666	Q09666100087	DVPDVNVQ	2883	D	V	P	D	V	N	V	Q	11	514.927	3	-3.0	1544.78	31.454	36.1	0.0013	SerTyr-VNVQGPDWHLK	VNVQGPDWHLK		No
10000178701	100087	Q09666_866	Q09666	Q09666100087	DVPDVEVQ	866	D	V	P	D	V	E	V	Q	11	519.932	3	8.3	1559.8	31.928	43.6	0.0022	SerTyr-VEVQGPDWHLK	VEVQGPDWHLK		No
10000178705	100087	Q09666_1584	Q09666	Q09666100087	SMPDVGLN	1584	S	M	P	D	V	G	L	N	9	397.238	3	3.3	1191.71	28.159	26.1	0.0042	SerTyr-VGLNLKAPK	VGLNLKAPK		No
10000178709	100087	Q09666_5581	Q09666	Q09666100087	SAPDISLG	5581	S	A	P	D	I	S	L	G	11	463.919	3	3.7	1391.76	30.964	40	0.0077	SerTyr-ISLGEGHLSVK	ISLGEGHLSVK		No
10000178714	100087	Q09666_740	Q09666	Q09666100087	PDVDVHGP	740	P	D	V	D	V	H	G	P	9	446.896	3	12	1340.69	28.575	27.7	0.011	SerTyr-VHGPDWHLK	VHGPDWHLK		No
10000178717	100087	Q09666_2712	Q09666	Q09666100087	SMPDIDLN	2712	S	M	P	D	I	D	L	N	9	416.573	3	4.5	1249.72	29.632	27.1	0.013	SerTyr-IDLNLKGPK	IDLNLKGPK		No
10000178725	100087	P26599_173	P26599	P26599100087	AAVDAGMA	173	A	A	V	D	A	G	M	A	13	524.249	3	-1.6	1572.75	26.379	44.7	1.2e-06	SerTyr-AGM(Oxidation)AM(Oxidation)AGQSPVLR	AGMAMAGQSPVLR		No
10000178728	100087	P26599_3	P26599	P26599100087	--MDGIVP	3	-	-	M	D	G	I	V	P	12	492.615	3	6.7	1477.85	31.314	33.9	0.00049	SerTyr-GIVPDIAVGTKR	GIVPDIAVGTKR		No
10000178731	100087	P26368_129	P26368	P26368100087	MTPDGLAV	129	M	T	P	D	G	L	A	V	18	687.353	3	-19	2062.06	33.174	57.3	9.6e-08	SerTyr-GLAVTPTPVPVVGSQMTR	GLAVTPTPVPVVGSQMTR		No
10000178747	100087	P60709_158	P60709	P60709100087	DSGDGVTH	158	D	S	G	D	G	V	T	H	20	615.084	4	9.3	2460.34	35.62	27.4	0.0016	SerTyr-GVTHTVPIYEGYALPHAILR	GVTHTVPIYEGYALPHAILR	yes	No	TRUE
10000178780	100087	Q96AE4_84	Q96AE4	Q96AE4100087	PQNDSFGT	84	P	Q	N	D	S	F	G	T	15	664.657	3	9.0	1993.97	30.351	30.8	0.00028	SerTyr-SFGTQLPPMHQQQSR	SFGTQLPPMHQQQSR		No
10000178785	100087	Q92945_103	Q92945	Q92945100087	STPDFGFG	103	S	T	P	D	F	G	F	G	7	495.731	2	-12	991.463	30.073	21.5	0.013	SerTyr-FGFGGQK	FGFGGQK		No
10000178792	100087	P27816_47	P27816	P27816100087	GKTDYIPL	47	G	K	T	D	Y	I	P	L	10	727.86	2	-19	1455.72	36.642	38.9	0.0015	SerTyr-YIPLLDVDEK	YIPLLDVDEK		No
10000178794	100087	P27816_9	P27816	P27816100087	SLADALTE	9	S	L	A	D	A	L	T	E	14	874.921	2	-14	1749.84	31.806	39.5	0.0047	SerTyr-ALTEPSPDIEGEIK	ALTEPSPDIEGEIK		No
10000178817	100087	P43243_681	P43243	P43243100087	DETDLANL	681	D	E	T	D	L	A	N	L	18	524.273	4	17	2097.09	29.282	45.6	7.4e-06	SerTyr-LANLGDVASDGKKEPSDK	LANLGDVASDGKKEPSDK		No
10000178820	100087	P43243_764	P43243	P43243100087	ENADGQSD	764	E	N	A	D	G	Q	S	D	17	765.661	3	0.56	2296.98	29.339	32.2	0.019	SerTyr-GQSDENKDDYTIPDEYR	GQSDENKDDYTIPDEYR		No
10000178822	100087	Q14151_821	Q14151	Q14151100087	DSRDGWGG	821	D	S	R	D	G	W	G	G	9	588.746	2	-9.6	1177.49	28.259	37.3	0.0034	SerTyr-GWGGYGSDK	GWGGYGSDK	yes	No
10000178827	100087	P07355_17	P07355	P07355100087	LEGDHSTP	17	L	E	G	D	H	S	T	P	12	494.245	3	8.9	1482.73	24.88	34.6	0.0001	SerTyr-HSTPPSAYGSVK	HSTPPSAYGSVK	yes	No
10000178835	100087	Q99848_212	Q99848	Q99848100087	DKLDFLEG	212	D	K	L	D	F	L	E	G	12	551.288	3	4.1	1653.87	29.473	28.6	0.0017	SerTyr-FLEGDQKPLAQR	FLEGDQKPLAQR		No
10000178839	100087	Q93009_51	Q93009	Q93009100087	ALSDGHNT	51	A	L	S	D	G	H	N	T	16	720.288	3	12	2160.86	26.535	50.9	2.7e-06	SerTyr-GHNTAEEDM(Oxidation)EDDTSWR	GHNTAEEDMEDDTSWR		No
10000178850	100087	P67809_25	P67809	P67809100087	SAADTKPG	25	S	A	A	D	T	K	P	G	29	673.839	4	6.8	2695.36	25.264	47.1	1.5e-08	SerTyr-TKPGTTGSGAGSGGPGGLTSAAPAGGDKK	TKPGTTGSGAGSGGPGGLTSAAPAGGDKK		No
10000178852	100087	P16989_270	P16989	P16989100087	EMKDGVPE	270	E	M	K	D	G	V	P	E	14	565.626	3	0.77	1696.88	28.265	26.1	0.00094	SerTyr-GVPEGAQLQGPVHR	GVPEGAQLQGPVHR		No
10000178861	100087	P29692_159	P29692	P29692100087	DDIDLFGS	159	D	D	I	D	L	F	G	S	17	734.34	3	3.0	2203.02	31.384	39	8.1e-05	SerTyr-LFGSDNEEEDKEAAQLR	LFGSDNEEEDKEAAQLR		No
10000178862	100087	Q9Y5A9_368	Q9Y5A9	Q9Y5A9100087	NGVDGNGV	368	N	G	V	D	G	N	G	V	24	857.422	3	15	2572.27	26.836	48.9	1.4e-06	SerTyr-GNGVGQSQAGSGSTPSEPHPVLEK	GNGVGQSQAGSGSTPSEPHPVLEK		No
10000178863	100087	Q9Y5A9_167	Q9Y5A9	Q9Y5A9100087	AMIDGQSA	167	A	M	I	D	G	Q	S	A	12	765.355	2	-13	1530.71	28.208	42	0.00014	SerTyr-GQSAFANETLNK	GQSAFANETLNK		No
10000178864	100087	P33991_133	P33991	P33991100087	LQSDGAAA	133	L	Q	S	D	G	A	A	A	17	641.975	3	-9.7	1925.93	33.21	60.7	1.2e-05	SerTyr-GAAAEDIVASEQSLGQK	GAAAEDIVASEQSLGQK		No
10000178867	100087	P22626_131	P22626	P22626100087	HLRDYFEE	131	H	L	R	D	Y	F	E	E	7	593.249	2	-16	1186.5	30.178	19.9	0.018	SerTyr-YFEEYGK	YFEEYGK		No
10000178868	100087	Q9NT62_105	Q9NT62	Q9NT62100087	DDGDGGWV	105	D	D	G	D	G	G	W	V	20	790.39	3	6.6	2371.17	34.797	54.1	1.9e-06	SerTyr-GGWVDTYHNTGITGITEAVK	GGWVDTYHNTGITGITEAVK		No
10000178873	100087	P08670_258	P08670	P08670100087	VQIDVDVS	258	V	Q	I	D	V	D	V	S	13	545.636	3	11	1636.91	31.637	32.6	0.0017	SerTyr-VDVSKPDLTAALR	VDVSKPDLTAALR		No	TRUE
10000178875	100087	P08670_260	P08670	P08670100087	IDVDVSKP	260	I	D	V	D	V	S	K	P	11	474.261	3	-7.8	1422.78	28.86	32.6	0.0056	SerTyr-VSKPDLTAALR	VSKPDLTAALR		No	TRUE
10000178878	100087	Q13435_777	Q13435	Q13435100087	EAMDGSET	777	E	A	M	D	G	S	E	T	15	651.347	3	8.0	1954.04	33.587	34.8	2.8e-05	SerTyr-GSETPQLFTVLPEKR	GSETPQLFTVLPEKR		No
10000178880	100087	O15042_738	O15042	O15042100087	DDLDGVPL	738	D	D	L	D	G	V	P	L	18	560.294	4	12	2241.18	30.521	33.9	4.3e-05	SerTyr-GVPLDATEDSKKNEPIFK	GVPLDATEDSKKNEPIFK		No
10000178883	100087	Q8N4X5_631	Q8N4X5	Q8N4X5100087	SCPDAVVA	631	S	C	P	D	A	V	V	A	14	770.906	2	-21	1541.81	28.094	40.8	0.0013	SerTyr-AVVATPPGASPPVK	AVVATPPGASPPVK		No
10000178885	100087	Q8N4X5_313	Q8N4X5	Q8N4X5100087	SSVDGHPE	313	S	S	V	D	G	H	P	E	9	415.207	3	7.9	1245.62	24.022	28.2	0.0083	SerTyr-GHPEVPETK	GHPEVPETK		No
10000178887	100087	Q15459_33	Q15459	Q15459100087	SKEDSAPS	33	S	K	E	D	S	A	P	S	18	719.397	3	0.62	2158.19	32.57	44	0.002	SerTyr-SAPSKPVVGIIYPPPEVR	SAPSKPVVGIIYPPPEVR		No
10000178888	100087	Q96MG2_13	Q96MG2	Q96MG2100087	EELDGGLG	13	E	E	L	D	G	G	L	G	22	846.38	3	1.7	2539.14	31.243	43.9	4.1e-05	SerTyr-GGLGSCQALEDHSALAETQEDR	GGLGSCQALEDHSALAETQEDR		No
10000178894	100087	P53621_857	P53621	P53621100087	LDEDGFVE	857	L	D	E	D	G	F	V	E	16	914.919	2	-16	1829.84	35.413	45.5	2.5e-06	SerTyr-GFVEATEGLGDDALGK	GFVEATEGLGDDALGK		No
10000178895	100087	P53621_189	P53621	P53621100087	TGVDLFGT	189	T	G	V	D	L	F	G	T	10	650.836	2	-11	1301.67	31.987	40	0.006	SerTyr-LFGTTDAVVK	LFGTTDAVVK		No
10000178900	100087	O60232_82	O60232	O60232100087	SDVDKDNP	82	S	D	V	D	K	D	N	P	16	640	3	4.8	1920	30.387	55.7	9.1e-06	SerTyr-KDNPALNAQAALSQAR	KDNPALNAQAALSQAR		No
10000178904	100087	Q86WB0_296	Q86WB0	Q86WB0100087	TDLDASFG	296	T	D	L	D	A	S	F	G	19	741.055	3	12	2223.16	34.817	43.7	1.8e-05	SerTyr-ASFGLTSSPIPGLEGRPER	ASFGLTSSPIPGLEGRPER		No
10000178912	100087	Q8WWM7_585	Q8WWM7	Q8WWM7100087	KEVDGLLT	585	K	E	V	D	G	L	L	T	15	878.416	2	-13	1756.83	29.558	41.5	0.00012	SerTyr-GLLTSEPM(Oxidation)GSPVSSK	GLLTSEPMGSPVSSK		No
10000178921	100087	P49321_33	P49321	P49321100087	TSADKVES	33	T	S	A	D	K	V	E	S	13	425.228	4	18	1700.91	26.872	39.9	6.8e-05	SerTyr-KVESLDVDSEAKK	KVESLDVDSEAKK		No
10000178924	100087	P49006_64	P49006	P49006100087	ATGDAIEP	64	A	T	G	D	A	I	E	P	14	808.387	2	-19	1616.77	26.416	50.7	0.0016	SerTyr-AIEPAPPSQGAEAK	AIEPAPPSQGAEAK		No
10000178925	100087	Q96T58_2008	Q96T58	Q96T58100087	PKVDATRP	2008	P	K	V	D	A	T	R	P	17	668.692	3	11	2006.08	27.991	42.8	8.4e-05	SerTyr-ATRPEATTEVGPQIGVK	ATRPEATTEVGPQIGVK		No
10000178926	100087	Q96T58_1575	Q96T58	Q96T58100087	STTDSIQE	1575	S	T	T	D	S	I	Q	E	12	554.631	3	9.0	1663.89	33.771	37.4	0.0066	SerTyr-SIQEPVVLFHSR	SIQEPVVLFHSR		No
10000178928	100087	P49792_1158	P49792	P49792100087	HETDGGSA	1158	H	E	T	D	G	G	S	A	24	681.6	4	71	2726.4	31.862	26.3	0.00052	SerTyr-GGSAHGDDDDDGPHFEPVVPLPDK	GGSAHGDDDDDGPHFEPVVPLPDK		No
10000178930	100087	Q9Y5S9_7	Q9Y5S9	Q9Y5S9100087	DVLDLHEA	7	D	V	L	D	L	H	E	A	21	642.776	4	14	2571.11	29.041	50	2.8e-08	SerTyr-LHEAGGEDFAM(Oxidation)DEDGDESIHK	LHEAGGEDFAMDEDGDESIHK		No
10000178936	100087	Q14657_29	Q14657	Q14657100087	GGVDTAAA	29	G	G	V	D	T	A	A	A	19	625.321	3	10	1875.96	25.182	32	0.0023	SerTyr-TAAAPAGGAPPAHAPGPGR	TAAAPAGGAPPAHAPGPGR		No
10000178937	100087	O60271_6	O60271	O60271100087	ELEDGVVY	6	E	L	E	D	G	V	V	Y	18	701.31	3	-16	2103.93	29.806	58.9	5.9e-08	SerTyr-GVVYQEEPGGSGAVMSER	GVVYQEEPGGSGAVMSER		No
10000178938	100087	Q7L014_872	Q7L014	Q7L014100087	ESQDVMQQ	872	E	S	Q	D	V	M	Q	Q	11	755.877	2	-15	1511.75	29.309	45.6	0.00028	SerTyr-VM(Oxidation)QQATNAILR	VMQQATNAILR		No
10000178945	100087	Q6JBY9_273	Q6JBY9	Q6JBY9100087	EEVDGQHP	273	E	E	V	D	G	Q	H	P	23	908.748	3	6.1	2726.24	25.985	61.4	9.7e-08	SerTyr-GQHPAQEEVPESPQTSGPEAENR	GQHPAQEEVPESPQTSGPEAENR		No
10000178961	100087	P25205_704	P25205	P25205100087	KDGDSYDP	704	K	D	G	D	S	Y	D	P	21	927.729	3	7.9	2783.19	31.879	45.9	2.5e-07	SerTyr-SYDPYDFSDTEEEM(Oxidation)PQVHTPK	SYDPYDFSDTEEEMPQVHTPK		No
10000178962	100087	Q6ZRS2_2276	Q6ZRS2	Q6ZRS2100087	NENDGFPA	2276	N	E	N	D	G	F	P	A	22	848.695	3	4.4	2546.08	27.905	37.6	9.4e-08	SerTyr-GFPAGEGEEAGRPGAEDEEM(Oxidation)SR	GFPAGEGEEAGRPGAEDEEMSR		No
10000178963	100087	P20810_349	P20810	P20810100087	TDKDGKPL	349	T	D	K	D	G	K	P	L	15	492.038	4	25	1968.15	26.135	33.8	2.4e-06	SerTyr-GKPLLPEPEEKPKPR	GKPLLPEPEEKPKPR		No
10000178965	100087	P12270_2148	P12270	P12270100087	HRTDGFAE	2148	H	R	T	D	G	F	A	E	16	629.328	3	6.9	1887.98	31.866	43.2	3.3e-07	SerTyr-GFAEAIHSPQVAGVPR	GFAEAIHSPQVAGVPR		No
10000178968	100087	Q13177_149	Q13177	Q13177100087	PEKDGFPS	149	P	E	K	D	G	F	P	S	12	705.346	2	-15	1410.69	30.657	40	0.00089	SerTyr-GFPSGTPALNAK	GFPSGTPALNAK		No
10000178975	100087	O75934_15	O75934	O75934100087	VVVDALPY	15	V	V	V	D	A	L	P	Y	15	644.971	3	-6.6	1934.91	35.272	53.7	8.7e-07	SerTyr-ALPYFDQGYEAPGVR	ALPYFDQGYEAPGVR		No
10000178977	100087	Q1KMD3_127	Q1KMD3	Q1KMD3100087	AEPDASEK	127	A	E	P	D	A	S	E	K	25	851.073	3	5.5	2553.22	26.09	54.5	9.7e-07	SerTyr-ASEKPAEATAGSGGVNGGEEQGLGK	ASEKPAEATAGSGGVNGGEEQGLGK		No
10000178979	100087	Q9C0C9_1226	Q9C0C9	Q9C0C9100087	TAPDASVP	1226	T	A	P	D	A	S	V	P	10	420.576	3	11	1261.73	24.603	25.5	0.0055	SerTyr-ASVPPSVKPK	ASVPPSVKPK		No
10000178982	100087	Q02750_17	Q02750	Q02750100087	PAPDGSAV	17	P	A	P	D	G	S	A	V	19	709.666	3	-17	2129	30.194	56.2	1.2e-06	SerTyr-GSAVNGTSSAETNLEALQK	GSAVNGTSSAETNLEALQK		No
10000178983	100087	Q5T5Y3_1255	Q5T5Y3	Q5T5Y3100087	VSLDGSAD	1255	V	S	L	D	G	S	A	D	20	779.048	3	1.8	2337.14	35.894	47.9	1.4e-06	SerTyr-GSADLVSEGDQKPGVGFFFK	GSADLVSEGDQKPGVGFFFK		No
10000178988	100087	Q96PK2_1524	Q96PK2	Q96PK2100087	DLCDGSAN	1524	D	L	C	D	G	S	A	N	20	829.748	3	2.9	2489.24	33.833	43.6	1.7e-06	SerTyr-GSANQLQQLQSQLAHQTEQK	GSANQLQQLQSQLAHQTEQK		No
10000178989	100087	Q9H6S0_1084	Q9H6S0	Q9H6S0100087	FRVDGIPN	1084	F	R	V	D	G	I	P	N	14	895.348	2	-11	1790.7	25.765	44.9	1.7e-06	SerTyr-GIPNDSSDSEM(Oxidation)EDK	GIPNDSSDSEMEDK		No
10000178994	100087	O60506_469	O60506	O60506100087	DYYDYYGY	469	D	Y	Y	D	Y	Y	G	Y	10	555.24	3	15	1665.72	29.509	29.9	5.7e-05	SerTyr-YYGYDYHNYR	YYGYDYHNYR		No
10000178998	100087	O75940_63	O75940	O75940100087	ASSDSFAS	63	A	S	S	D	S	F	A	S	12	542.927	3	6.4	1628.78	28.544	43	3e-06	SerTyr-SFASTQPTHSWK	SFASTQPTHSWK		No
10000179000	100087	P33992_14	P33992	P33992100087	FYSDSFGG	14	F	Y	S	D	S	F	G	G	14	829.846	2	-11	1659.69	26.971	49.4	3.6e-06	SerTyr-SFGGDAQADEGQAR	SFGGDAQADEGQAR		No
10000179001	100087	Q9Y520_2190	Q9Y520	Q9Y520100087	SVTDYTTP	2190	S	V	T	D	Y	T	T	P	18	716.004	3	-15	2148.01	28.939	46.6	3.7e-06	SerTyr-YTTPSSSLPNTVATNNTK	YTTPSSSLPNTVATNNTK		No
10000179004	100087	Q92597_10	Q92597	Q92597100087	QDVDLAEV	10	Q	D	V	D	L	A	E	V	10	459.266	3	0.88	1377.8	30.719	40.2	0.017	SerTyr-LAEVKPLVEK	LAEVKPLVEK		No
10000179005	100087	Q99615_9	Q99615	Q99615100087	AECDVVMA	9	A	E	C	D	V	V	M	A	18	761.038	3	-0.99	2283.11	31.366	37.5	1.8e-06	SerTyr-VVM(Oxidation)AATEPELLDDQEAKR	VVMAATEPELLDDQEAKR		No
10000179006	100087	Q16576_99	Q16576	Q16576100087	SHCDSDKG	99	S	H	C	D	S	D	K	G	15	574.945	3	13	1724.83	30.211	48.1	6.3e-06	SerTyr-SDKGEFGGFGSVTGK	SDKGEFGGFGSVTGK		No
10000179007	100087	O94973_691	O94973	O94973100087	VFSDSASV	691	V	F	S	D	S	A	S	V	18	679.986	3	-22	2039.96	32.179	49.5	7.5e-06	SerTyr-SASVVAPLAPGSEDNFAR	SASVVAPLAPGSEDNFAR		No
10000179011	100087	P36915_344	P36915	P36915100087	QQTDSAME	344	Q	Q	T	D	S	A	M	E	12	785.332	2	-18	1570.66	24.149	49.2	1.2e-05	SerTyr-SAM(Oxidation)EPTGPTQER	SAMEPTGPTQER		No
10000179014	100087	Q9P1Z2_135	Q9P1Z2	Q9P1Z2100087	EEADGGSD	135	E	E	A	D	G	G	S	D	11	674.368	2	-18	1348.74	33.915	41.8	1.7e-05	SerTyr-GGSDILLVVPK	GGSDILLVVPK		No
10000179016	100087	O14639_568	O14639	O14639100087	IETDHWPG	568	I	E	T	D	H	W	P	G	16	657.995	3	15	1973.99	36.477	45.6	2e-05	SerTyr-HWPGPPSFAVVGPDMK	HWPGPPSFAVVGPDMK		No
10000179018	100087	Q6P2E9_486	Q6P2E9	Q6P2E9100087	EENDSLGA	486	E	E	N	D	S	L	G	A	22	760.378	3	9.1	2281.13	30.627	43.9	2.2e-05	SerTyr-SLGADGTHGAGAM(Oxidation)ESAAGVLIK	SLGADGTHGAGAMESAAGVLIK		No
10000179028	100087	Q13362_15	Q13362	Q13362100087	MVVDAANS	15	M	V	V	D	A	A	N	S	17	695.045	3	5.9	2085.14	36.789	42.5	3.1e-05	SerTyr-AANSNGPFQPVVLLHIR	AANSNGPFQPVVLLHIR		No
10000179030	100087	Q8WV28_178	Q8WV28	Q8WV28100087	DEADYVVP	178	D	E	A	D	Y	V	V	P	25	1031.46	3	-12	3094.38	31.787	34.3	3e-06	SerTyr-YVVPVEDNDENYIHPTESSSPPPEK	YVVPVEDNDENYIHPTESSSPPPEK		No
10000179031	100087	Q9H4A3_2026	Q9H4A3	Q9H4A3100087	DVDDGSGS	2026	D	V	D	D	G	S	G	S	14	414.705	4	13	1658.82	22.641	34.5	3.4e-06	SerTyr-GSGSPHSPHQLSSK	GSGSPHSPHQLSSK		No
10000179033	100087	P56962_202	P56962	P56962100087	EKIDSIAD	202	E	K	I	D	S	I	A	D	18	697.675	3	5.7	2093.03	30.813	48.7	3.7e-05	SerTyr-SIADHVNSAAVNVEEGTK	SIADHVNSAAVNVEEGTK		No
10000179037	100087	Q14C86_1103	Q14C86	Q14C86100087	DLPDSASQ	1103	D	L	P	D	S	A	S	Q	16	658.308	3	16	1974.93	27.759	40	5.1e-05	SerTyr-SASQAAHPQDSAFSYR	SASQAAHPQDSAFSYR		No
10000179039	100087	Q8N1G4_526	Q8N1G4	Q8N1G4100087	TEADAVSG	526	T	E	A	D	A	V	S	G	17	630.637	3	-15	1891.91	28.323	49.8	5.8e-05	SerTyr-AVSGQLPDPTTNPSAGK	AVSGQLPDPTTNPSAGK		No
10000179040	100087	Q71RC2_574	Q71RC2	Q71RC2100087	VQKDGLNQ	574	V	Q	K	D	G	L	N	Q	19	744.401	3	9.2	2233.2	29.585	44.5	6e-05	SerTyr-GLNQTTIPVSPPSTTKPSR	GLNQTTIPVSPPSTTKPSR		No
10000179046	100087	Q96PU5_346	Q96PU5	Q96PU5100087	SVTDAVAE	346	S	V	T	D	A	V	A	E	17	635.664	3	8.9	1906.99	27.309	42.5	8.4e-05	SerTyr-AVAEQGHLPPPSAPAGR	AVAEQGHLPPPSAPAGR		No
10000179049	100087	P00519_940	P00519	P00519100087	SLVDAVNS	940	S	L	V	D	A	V	N	S	17	640.326	3	7.1	1920.98	25.644	42.6	9.7e-05	SerTyr-AVNSDAAKPSQPGEGLK	AVNSDAAKPSQPGEGLK		No
10000179051	100087	O43719_40	O43719	O43719100087	GEPDSLGQ	40	G	E	P	D	S	L	G	Q	18	791.045	3	4.9	2373.14	32.924	43	9.9e-05	SerTyr-SLGQQPTDTPYEWDLDKK	SLGQQPTDTPYEWDLDKK		No
10000179056	100087	O60664_220	O60664	O60664100087	TSLDGFDV	220	T	S	L	D	G	F	D	V	11	742.847	2	-18	1485.69	29.922	43.4	0.00012	SerTyr-GFDVASVQQQR	GFDVASVQQQR		No
10000179061	100087	Q92870_280	Q92870	Q92870100087	DETDIWSD	280	D	E	T	D	I	W	S	D	18	792.71	3	9.0	2378.13	36.048	39.9	0.00015	SerTyr-IWSDHSFQTDPDLPPGWK	IWSDHSFQTDPDLPPGWK		No
10000179062	100087	P35637_356	P35637	P35637100087	DWFDGKEF	356	D	W	F	D	G	K	E	F	10	442.898	3	7.0	1328.69	27.193	22.3	0.0019	SerTyr-GKEFSGNPIK	GKEFSGNPIK		No
10000179065	100087	Q92804_141	Q92804	Q92804100087	QQHDSYSQ	141	Q	Q	H	D	S	Y	S	Q	13	621.613	3	11	1864.84	24.17	33.5	1.2e-05	SerTyr-SYSQNQQSYHSQR	SYSQNQQSYHSQR		No
10000179068	100087	Q12906_440	Q12906	Q12906100087	VEVDGNSF	440	V	E	V	D	G	N	S	F	11	665.79	2	-14	1331.58	25.038	36.9	5.9e-05	SerTyr-GNSFEASGPSK	GNSFEASGPSK		No
10000179069	100087	O95433_19	O95433	O95433100087	ERADATNV	19	E	R	A	D	A	T	N	V	12	593.281	3	14	1779.84	31.738	38.7	0.00013	SerTyr-ATNVNNWHWTER	ATNVNNWHWTER		No
10000179075	100087	Q9BY77_235	Q9BY77	Q9BY77100087	VQNDAYTA	235	V	Q	N	D	A	Y	T	A	12	748.875	2	-21	1497.75	31.196	40.8	0.00039	SerTyr-AYTAPALPSSIR	AYTAPALPSSIR		No
10000179078	100087	Q6PKG0_173	Q6PKG0	Q6PKG0100087	DFGDAINW	173	D	F	G	D	A	I	N	W	13	561.965	3	18	1685.89	32.744	42	0.00043	SerTyr-AINWPTPGEIAHK	AINWPTPGEIAHK		No
10000179079	100087	P15170_40	P15170	P15170100087	SLGDGRPP	40	S	L	G	D	G	R	P	P	22	573.1	5	74	2865.5	27.53	27.6	0.0013	SerTyr-GRPPEESAHEM(Oxidation)M(Oxidation)EEEEEIPKPK	GRPPEESAHEMMEEEEEIPKPK		No
10000179086	100087	Q8N684_34	Q8N684	Q8N684100087	LYDDVLTA	34	L	Y	D	D	V	L	T	A	12	770.357	2	-15	1540.71	26.24	48.4	0.00055	SerTyr-VLTATSQPSDDR	VLTATSQPSDDR		No
10000179093	100087	O75925_101	O75925	O75925100087	LTYDGHPA	101	L	T	Y	D	G	H	P	A	17	640.695	3	6.2	1922.09	35.433	48.8	0.00073	SerTyr-GHPASSPLLPVSLLGPK	GHPASSPLLPVSLLGPK		No
10000179094	100087	P23588_51	P23588	P23588100087	LEGDVSTT	51	L	E	G	D	V	S	T	T	14	648.961	3	16	1946.88	29.228	36.4	0.00017	SerTyr-VSTTWHSNDDDVYR	VSTTWHSNDDDVYR		No
10000179098	100087	O94888_401	O94888	O94888100087	EKADGVVE	401	E	K	A	D	G	V	V	E	12	717.362	2	-6.7	1434.72	30.272	45.5	0.00082	SerTyr-GVVEGIDVNGPK	GVVEGIDVNGPK		No
10000179103	100087	Q14161_626	Q14161	Q14161100087	LVPDTAEP	626	L	V	P	D	T	A	E	P	20	789.741	3	11	2369.22	31.738	39	0.00064	SerTyr-TAEPHVAPSPTLPSTEDVIR	TAEPHVAPSPTLPSTEDVIR		No
10000179104	100087	Q9NQ55_246	Q9NQ55	Q9NQ55100087	AEPDGDHN	246	A	E	P	D	G	D	H	N	15	609.975	3	7.0	1829.93	30.473	38.2	0.00048	SerTyr-GDHNITELPQAVAGR	GDHNITELPQAVAGR		No
10000179106	100087	P19623_7	P19623	P19623100087	PGPDGPAA	7	P	G	P	D	G	P	A	A	11	609.307	2	-17	1218.61	26.253	40.5	0.0011	SerTyr-GPAASGPAAIR	GPAASGPAAIR		No
10000179108	100087	Q96GM8_8	Q96GM8	Q96GM8100087	DSDDGAVS	8	D	S	D	D	G	A	V	S	15	762.357	2	-17	1524.71	25.264	45.1	0.0014	SerTyr-GAVSAPAASDGGVSK	GAVSAPAASDGGVSK		No
10000179110	100087	P54578_228	P54578	P54578100087	KETDSSSA	228	K	E	T	D	S	S	S	A	11	622.286	2	-12	1244.57	22.002	36.9	0.00038	SerTyr-SSSASAATPSK	SSSASAATPSK		No
10000179111	100087	Q00403_208	Q00403	Q00403100087	TSVDLITT	208	T	S	V	D	L	I	T	T	10	703.824	2	-16	1407.65	31.62	38.8	0.00085	SerTyr-LITTGDFM(Oxidation)SR	LITTGDFMSR		No
10000179112	100087	Q96PU8_75	Q96PU8	Q96PU8100087	ELPDAVGP	75	E	L	P	D	A	V	G	P	11	716.382	2	-20	1432.76	31.07	40.8	0.0014	SerTyr-AVGPIVQLQEK	AVGPIVQLQEK		No
10000179117	100087	Q9Y244_13	Q9Y244	Q9Y244100087	ELKDSIPV	13	E	L	K	D	S	I	P	V	20	802.415	3	14	2407.25	36.776	35.5	0.00029	SerTyr-SIPVTELSASGPFESHDLLR	SIPVTELSASGPFESHDLLR		No
10000179119	100087	P80723_166	P80723	P80723100087	TKSDGAPA	166	T	K	S	D	G	A	P	A	19	660.985	3	13	1982.95	22.974	35.4	0.00031	SerTyr-GAPASDSKPGSSEAAPSSK	GAPASDSKPGSSEAAPSSK		No
10000179130	100087	P27540_152	P27540	P27540100087	TSTDGSYK	152	T	S	T	D	G	S	Y	K	14	621.66	3	27	1864.98	32.542	37	0.00099	SerTyr-GSYKPSFLTDQELK	GSYKPSFLTDQELK		No
10000179137	100087	O95391_8	O95391	O95391100087	TVVDAVNA	8	T	V	V	D	A	V	N	A	11	632.818	2	-19	1265.64	26.501	38.9	0.0027	SerTyr-AVNAAPLSGSK	AVNAAPLSGSK		No
10000179142	100087	O75367_173	O75367	O75367100087	ASADSTTE	173	A	S	A	D	S	T	T	E	17	981.456	2	-15	1962.91	31.679	34.2	0.00047	SerTyr-STTEGTPADGFTVLSTK	STTEGTPADGFTVLSTK		No
10000179146	100087	O43815_437	O43815	O43815100087	NEADSLTY	437	N	E	A	D	S	L	T	Y	10	694.833	2	-7.6	1389.67	30.167	42.4	0.0067	SerTyr-SLTYDIANNK	SLTYDIANNK		No
10000179147	100087	P42345_2460	P42345	P42345100087	EILDGVEL	2460	E	I	L	D	G	V	E	L	10	429.556	3	13	1288.67	26.43	37.8	0.0026	SerTyr-GVELGEPAHK	GVELGEPAHK		No
10000179148	100087	P47712_523	P47712	P47712100087	DELDAAVA	523	D	E	L	D	A	A	V	A	11	735.318	2	-18	1470.64	29.08	44.8	0.0068	SerTyr-AAVADPDEFER	AAVADPDEFER		No
10000179149	100087	Q9UHQ1_273	Q9UHQ1	Q9UHQ1100087	SVRDAAVD	273	S	V	R	D	A	A	V	D	14	591.302	3	10	1773.91	36.501	35.5	0.001	SerTyr-AAVDTLFGDLKEDK	AAVDTLFGDLKEDK		No
10000179150	100087	Q9H3P7_16	Q9H3P7	Q9H3P7100087	VSVDGLTL	16	V	S	V	D	G	L	T	L	34	901.5	4	36	3606	36.557	33.2	0.00041	SerTyr-GLTLSPDPEERPGAEGAPLLPPPLPPPSPPGSGR	GLTLSPDPEERPGAEGAPLLPPPLPPPSPPGSGR		No
10000179151	100087	O14686_2141	O14686	O14686100087	TSADGFLK	2141	T	S	A	D	G	F	L	K	22	820.767	3	2.3	2462.3	37.079	33.2	0.00043	SerTyr-GFLKPPAGSVPGPDSPGELFLK	GFLKPPAGSVPGPDSPGELFLK		No
10000179152	100087	Q9BTE6_81	Q9BTE6	Q9BTE6100087	EQADHFTQ	81	E	Q	A	D	H	F	T	Q	16	682.36	3	9.7	2047.08	33.173	40.6	0.0082	SerTyr-HFTQTPLDPGSQVLVR	HFTQTPLDPGSQVLVR		No
10000179153	100087	P43686_298	P43686	P43686100087	NQMDGFDQ	298	N	Q	M	D	G	F	D	Q	9	635.798	2	-14	1271.6	28.084	42.1	0.0083	SerTyr-GFDQNVNVK	GFDQNVNVK		No
10000179154	100087	P09234_11	P09234	P09234100087	DYCDTYLT	11	D	Y	C	D	T	Y	L	T	11	509.244	3	-6.4	1527.73	27.3	29.6	0.0001	SerTyr-TYLTHDSPSVR	TYLTHDSPSVR		No
10000179158	100087	Q7Z6Z7_3665	Q7Z6Z7	Q7Z6Z7100087	LSPDGLPE	3665	L	S	P	D	G	L	P	E	11	739.348	2	-20	1478.7	26.849	44.8	0.01	SerTyr-GLPEEQPQTTK	GLPEEQPQTTK		No
10000179163	100087	Q9Y2X7_419	Q9Y2X7	Q9Y2X7100087	DLSDGAVT	419	D	L	S	D	G	A	V	T	13	581.324	3	11	1743.97	35.31	31.2	0.0003	SerTyr-GAVTLQEYLELKK	GAVTLQEYLELKK		No
10000179165	100087	Q13263_686	Q13263	Q13263100087	LSLDGADS	686	L	S	L	D	G	A	D	S	10	577.781	2	-13	1155.56	23.796	34.4	0.0014	SerTyr-GADSTGVVAK	GADSTGVVAK		No
10000179170	100087	P07814_930	P07814	P07814100087	DQVDIAVQ	930	D	Q	V	D	I	A	V	Q	10	702.9	2	-12	1405.8	38.903	40.5	0.018	SerTyr-IAVQELLQLK	IAVQELLQLK		No
10000179171	100087	Q14839_1234	Q14839	Q14839100087	EATDGGGD	1234	E	A	T	D	G	G	G	D	19	568.754	4	14	2275.02	26.114	28.6	0.00015	SerTyr-GGGDNKEGEDSSVIHYDDK	GGGDNKEGEDSSVIHYDDK		No
10000179172	100087	P21333_1049	P21333	P21333100087	VTYDGVPV	1049	V	T	Y	D	G	V	P	V	21	775.757	3	2.9	2327.27	34.92	31.4	0.0005	SerTyr-GVPVPGSPFPLEAVAPTKPSK	GVPVPGSPFPLEAVAPTKPSK		No
10000179174	100087	Q9BUJ2_97	Q9BUJ2	Q9BUJ2100087	SGPDGHYA	97	S	G	P	D	G	H	Y	A	10	481.885	3	5.7	1445.65	25.367	25.2	0.0051	SerTyr-GHYAM(Oxidation)DNITR	GHYAMDNITR		No
10000179178	100087	P62328_7	P62328	P62328100087	DKPDMAEI	7	D	K	P	D	M	A	E	I	9	454.221	3	3.2	1362.66	32.725	27.4	0.017	SerTyr-MAEIEKFDK	MAEIEKFDK		No
10000179182	100087	P22102_444	P22102	P22102100087	SGVDIAAG	444	S	G	V	D	I	A	A	G	9	591.807	2	-11	1183.61	27.703	39	0.015	SerTyr-IAAGNM(Oxidation)LVK	IAAGNMLVK		No
10000179184	100087	P62306_53	P62306	P62306100087	EYIDGALS	53	E	Y	I	D	G	A	L	S	13	524.626	3	6.5	1573.88	34.263	31.6	0.00077	SerTyr-GALSGHLGEVLIR	GALSGHLGEVLIR		No
10000179185	100087	Q8N573_539	Q8N573	Q8N573100087	TSADGHIE	539	T	S	A	D	G	H	I	E	10	435.57	3	8.3	1306.71	28.658	30.6	0.00051	SerTyr-GHIESSALLK	GHIESSALLK		No
10000179192	100087	P51572_165	P51572	P51572100087	AAVDGGKL	165	A	A	V	D	G	G	K	L	12	479.577	3	-14	1438.73	27.423	32.9	0.0021	SerTyr-GGKLDVGNAEVK	GGKLDVGNAEVK		No
10000179196	100087	P35579_1154	P35579	P35579100087	DTLDSTAA	1154	D	T	L	D	S	T	A	A	9	627.304	2	-9.1	1254.61	25.765	37.4	0.016	SerTyr-STAAQQELR	STAAQQELR		No
10000179199	100087	P24534_103	P24534	P24534100087	DDIDLFGS	103	D	D	I	D	L	F	G	S	15	664.303	3	22	1992.91	28.498	31.5	0.0015	SerTyr-LFGSDDEEESEEAKR	LFGSDDEEESEEAKR		No
10000179201	100087	Q8NEF9_212	Q8NEF9	Q8NEF9100087	SEKDSVVS	212	S	E	K	D	S	V	V	S	9	613.808	2	-14	1227.62	28.558	35	0.0069	SerTyr-SVVSLESQK	SVVSLESQK		No
10000179210	100087	Q99733_9	Q99733	Q99733100087	SFSDGVPS	9	S	F	S	D	G	V	P	S	11	655.303	2	-22	1310.61	25.708	34.9	0.0089	SerTyr-GVPSDSVEAAK	GVPSDSVEAAK		No
10000179211	100087	O00566_546	O00566	O00566100087	SVSDAALL	546	S	V	S	D	A	A	L	L	12	521.291	3	6.8	1563.87	30.953	36.1	0.015	SerTyr-AALLAPEEIKEK	AALLAPEEIKEK		No
10000179213	100087	Q9UGU0_1220	Q9UGU0	Q9UGU0100087	HETDGHGL	1220	H	E	T	D	G	H	G	L	19	548.784	4	18	2195.14	28.027	32.2	0.0031	SerTyr-GHGLAEATQSSKPGSVM(Oxidation)LR	GHGLAEATQSSKPGSVMLR		No
10000179219	100087	Q8WVV9_290	Q8WVV9	Q8WVV9100087	FRHDGYGS	290	F	R	H	D	G	Y	G	S	14	567.635	3	9.3	1702.91	32.296	32.9	0.0061	SerTyr-GYGSHGPLLPLPSR	GYGSHGPLLPLPSR		No
10000179233	100087	Q96PZ0_51	Q96PZ0	Q96PZ0100087	LQNDFLSI	51	L	Q	N	D	F	L	S	I	19	765.727	3	6.9	2297.18	35.398	31.1	0.0045	SerTyr-FLSISEDVPRPPDTVSTGK	FLSISEDVPRPPDTVSTGK		No
10000179235	100087	O60583_455	O60583	O60583100087	DVRDHYIA	455	D	V	R	D	H	Y	I	A	12	426.224	4	23	1704.9	26.661	28.9	0.0022	SerTyr-HYIAAQVEQQHK	HYIAAQVEQQHK		No
10000179241	100087	Q96ST2_348	Q96ST2	Q96ST2100087	MQNDSFHS	348	M	Q	N	D	S	F	H	S	10	371.91	4	22	1487.64	22.916	22	0.0019	SerTyr-SFHSDSHM(Oxidation)DR	SFHSDSHMDR		No
10000179243	100087	P23246_526	P23246	P23246100087	EMEDAYHE	526	E	M	E	D	A	Y	H	E	11	401.209	4	20	1604.84	26.428	27.6	0.0015	SerTyr-AYHEHQANLLR	AYHEHQANLLR		No
10000179246	100087	P23193_125	P23193	P23193100087	NARDTYVS	125	N	A	R	D	T	Y	V	S	8	603.785	2	-14	1207.57	29.81	31.4	0.01	SerTyr-TYVSSFPR	TYVSSFPR		No
10000179249	100087	O15234_390	O15234	O15234100087	AAPDAAPP	390	A	A	P	D	A	A	P	P	12	513.279	3	13	1539.84	25.444	25.4	0.00088	SerTyr-AAPPPPDRPIEK	AAPPPPDRPIEK		No
10000179251	100087	Q13601_39	Q13601	Q13601100087	TVPDGWKE	39	T	V	P	D	G	W	K	E	9	433.889	3	11	1301.67	29.651	32.1	0.016	SerTyr-GWKEPAFSK	GWKEPAFSK		No
10000179254	100087	P46777_169	P46777	P46777100087	GAVDGGLS	169	G	A	V	D	G	G	L	S	10	416.218	3	-3.0	1248.65	27.318	26.1	0.0017	SerTyr-GGLSIPHSTK	GGLSIPHSTK		No
10000179256	100087	Q8N3X1_426	Q8N3X1	Q8N3X1100087	EEGDGSVS	426	E	E	G	D	G	S	V	S	9	542.25	2	-13	1084.5	22.324	30.2	0.01	SerTyr-GSVSGSSPR	GSVSGSSPR		No
10000179258	100087	P46940_9	P46940	P46940100087	DEVDGLGV	9	D	E	V	D	G	L	G	V	17	523.27	4	8.0	2093.08	30.287	28.3	0.0054	SerTyr-GLGVARPHYGSVLDNER	GLGVARPHYGSVLDNER		No
10000179259	100087	P45974_135	P45974	P45974100087	IARDGLGG	135	I	A	R	D	G	L	G	G	10	623.829	2	-23	1247.66	34.673	29.8	0.011	SerTyr-GLGGLPDIVR	GLGGLPDIVR		No
10000179260	100087	Q49A26_256	Q49A26	Q49A26100087	QAADSTAV	256	Q	A	A	D	S	T	A	V	14	556.954	3	2.6	1670.86	25.21	30.8	0.018	SerTyr-STAVNGSITPTDKK	STAVNGSITPTDKK		No
10000179264	100087	Q92576_1398	Q92576	Q92576100087	EENDFFNS	1398	E	E	N	D	F	F	N	S	11	530.943	3	12	1592.83	37.264	27.2	0.005	SerTyr-FFNSFTTVLHK	FFNSFTTVLHK		No
10000179274	100087	Q14566_275	Q14566	Q14566100087	SGVDGYET	275	S	G	V	D	G	Y	E	T	8	587.761	2	-19	1175.52	26.513	25.6	0.0036	SerTyr-GYETEGIR	GYETEGIR		No
10000179275	100087	O00232_20	O00232	O00232100087	MEVDYSAT	20	M	E	V	D	Y	S	A	T	8	595.27	2	-13	1190.54	25.522	28.8	0.015	SerTyr-YSATVDQR	YSATVDQR		No
10000179276	100087	P50991_269	P50991	P50991100087	VVSDYAQM	269	V	V	S	D	Y	A	Q	M	6	525.218	2	-6.1	1050.44	22.204	24.6	0.0027	SerTyr-YAQM(Oxidation)DR	YAQMDR		No
10000179279	100087	Q96CT7_150	Q96CT7	Q96CT7100087	TIEDAIAV	150	T	I	E	D	A	I	A	V	18	546.802	4	37	2187.21	37.107	27.8	0.013	SerTyr-AIAVLSVAEEAADRHPER	AIAVLSVAEEAADRHPER		No
10000179280	100087	Q6UN15_159	Q6UN15	Q6UN15100087	VDLDSFED	159	V	D	L	D	S	F	E	D	8	438.877	3	4.1	1316.63	29.893	25.3	0.0046	SerTyr-SFEDKPWR	SFEDKPWR		No
10000179283	100087	P30519_252	P30519	P30519100087	TLEDGFPV	252	T	L	E	D	G	F	P	V	8	369.521	3	20	1108.56	26.357	24.6	0.0041	SerTyr-GFPVHDGK	GFPVHDGK		No
10000179285	100087	Q8N163_619	Q8N163	Q8N163100087	LKEDGLLP	619	L	K	E	D	G	L	L	P	18	544.036	4	4.8	2176.15	29.666	24.2	0.004	SerTyr-GLLPKPLSSGGEEEEKPR	GLLPKPLSSGGEEEEKPR		No
10000179287	100087	Q9NRY2_58	Q9NRY2	Q9NRY2100087	DFRDHAEQ	58	D	F	R	D	H	A	E	Q	12	410.464	4	22	1641.86	22.051	27.4	0.018	SerTyr-HAEQQHIAAQQK	HAEQQHIAAQQK		No
10000179290	100087	P31943_252	P31943	P31943100087	GYNDGYGF	252	G	Y	N	D	G	Y	G	F	8	554.738	2	0.052	1109.48	27.392	27.4	0.019	SerTyr-GYGFGSDR	GYGFGSDR	yes	No
10000179293	100087	Q56P03_32	Q56P03	Q56P03100087	DEVDVLLH	32	D	E	V	D	V	L	L	H	10	453.223	3	-41	1359.67	26.902	26.8	0.017	SerTyr-VLLHGTPDQK	VLLHGTPDQK		No
10000179294	100087	Q99829_465	Q99829	Q99829100087	LDADGGPL	465	L	D	A	D	G	G	P	L	7	494.257	2	7.0	988.515	23.005	25.1	0.0085	SerTyr-GGPLHTR	GGPLHTR		No
10000179296	100087	O60508_205	O60508	O60508100087	DEKDVAKP	205	D	E	K	D	V	A	K	P	18	574.296	4	9.5	2297.18	30.888	24	0.0055	SerTyr-VAKPSEEEQKELDEITAK	VAKPSEEEQKELDEITAK		No
10000179297	100087	Q68CP9_630	Q68CP9	Q68CP9100087	SVPDVSPA	630	S	V	P	D	V	S	P	A	23	652.082	4	6.1	2608.33	29.91	23.6	0.0046	SerTyr-VSPAPSPAGIPHGSQTIGNHFQR	VSPAPSPAGIPHGSQTIGNHFQR		No
10000179298	100087	Q12802_2473	Q12802	Q12802100087	GGFDSHQM	2473	G	G	F	D	S	H	Q	M	12	513.922	3	43	1541.77	31.739	25.7	0.011	SerTyr-SHQM(Oxidation)NASKGGEK	SHQMNASKGGEK		No
10000179306	100087	Q5JSZ5_1930	Q5JSZ5	Q5JSZ5100087	LYLDGHVF	1930	L	Y	L	D	G	H	V	F	9	416.88	3	12	1250.64	25.524	26.2	0.02	SerTyr-GHVFASQPR	GHVFASQPR		No
10000179308	100087	Q5JTV8_227	Q5JTV8	Q5JTV8100087	DDQDSSHS	227	D	D	Q	D	S	S	H	S	10	428.223	3	22	1284.67	22.219	22.9	0.0055	SerTyr-SSHSSVTTVK	SSHSSVTTVK		No
10000179314	100089	P26368_129	P26368	P26368100089	MTPDGLAV	129	M	T	P	D	G	L	A	V	18	692.699	3	0.91	2078.1	32.427	49.8	7.8e-07	SerTyr-GLAVTPTPVPVVGSQM(Oxidation)TR	GLAVTPTPVPVVGSQMTR		No
10000179336	100089	P27816_9	P27816	P27816100089	SLADALTE	9	S	L	A	D	A	L	T	E	14	874.922	2	-13	1749.84	32.323	38.5	0.0072	SerTyr-ALTEPSPDIEGEIK	ALTEPSPDIEGEIK		No
10000179337	100089	O15042_738	O15042	O15042100089	DDLDGVPL	738	D	D	L	D	G	V	P	L	12	503.92	3	1.1	1511.76	26.869	33.4	0.0013	SerTyr-GVPLDATEDSKK	GVPLDATEDSKK		No
10000179339	100089	Q02750_17	Q02750	Q02750100089	PAPDGSAV	17	P	A	P	D	G	S	A	V	19	709.676	3	-3.1	2129.03	30.776	53.1	5.4e-07	SerTyr-GSAVNGTSSAETNLEALQK	GSAVNGTSSAETNLEALQK		No
10000179340	100089	P19623_7	P19623	P19623100089	PGPDGPAA	7	P	G	P	D	G	P	A	A	11	609.314	2	-4.9	1218.63	26.404	40.2	0.0018	SerTyr-GPAASGPAAIR	GPAASGPAAIR		No
10000179344	100089	Q8N684_30	Q8N684	Q8N684100089	DQIDLYDD	30	D	Q	I	D	L	Y	D	D	16	682.646	3	-2.5	2047.94	34.167	49	1.4e-06	SerTyr-LYDDVLTATSQPSDDR	LYDDVLTATSQPSDDR		No
10000179347	100089	P55209_58	P55209	P55209100089	ERLDGLVE	58	E	R	L	D	G	L	V	E	15	627.985	3	-10	1883.95	36.172	49.1	2.3e-06	SerTyr-GLVETPTGYIESLPR	GLVETPTGYIESLPR		No
10000179349	100089	P43243_764	P43243	P43243100089	ENADGQSD	764	E	N	A	D	G	Q	S	D	17	765.66	3	-0.72	2296.98	27.856	35.8	0.0017	SerTyr-GQSDENKDDYTIPDEYR	GQSDENKDDYTIPDEYR		No
10000179350	100089	P43243_681	P43243	P43243100089	DETDLANL	681	D	E	T	D	L	A	N	L	13	513.267	3	0.069	1539.8	30.307	35	0.004	SerTyr-LANLGDVASDGKK	LANLGDVASDGKK		No
10000179351	100089	O60664_220	O60664	O60664100089	TSLDGFDV	220	T	S	L	D	G	F	D	V	11	742.851	2	-12	1485.7	30.294	44.9	1.4e-05	SerTyr-GFDVASVQQQR	GFDVASVQQQR		No
10000179354	100089	Q8N1G4_526	Q8N1G4	Q8N1G4100089	TEADAVSG	526	T	E	A	D	A	V	S	G	17	630.649	3	4.2	1891.95	28.712	55.4	1.5e-05	SerTyr-AVSGQLPDPTTNPSAGK	AVSGQLPDPTTNPSAGK		No
10000179355	100089	P12270_2148	P12270	P12270100089	HRTDGFAE	2148	H	R	T	D	G	F	A	E	16	629.323	3	-0.26	1887.97	31.106	50.2	1.5e-05	SerTyr-GFAEAIHSPQVAGVPR	GFAEAIHSPQVAGVPR		No
10000179357	100089	Q13541_26	Q13541	Q13541100089	VLGDGVQL	26	V	L	G	D	G	V	Q	L	26	938.778	3	-14	2816.33	35.634	53.4	1.7e-05	SerTyr-GVQLPPGDYSTTPGGTLFSTTPGGTR	GVQLPPGDYSTTPGGTLFSTTPGGTR		No
10000179359	100089	Q13177_149	Q13177	Q13177100089	PEKDGFPS	149	P	E	K	D	G	F	P	S	12	705.351	2	-8.2	1410.7	31.007	38.5	1.3e-05	SerTyr-GFPSGTPALNAK	GFPSGTPALNAK		No
10000179362	100089	P80723_166	P80723	P80723100089	TKSDGAPA	166	T	K	S	D	G	A	P	A	19	660.973	3	-5.4	1982.92	21.582	41.6	3.4e-05	SerTyr-GAPASDSKPGSSEAAPSSK	GAPASDSKPGSSEAAPSSK		No
10000179365	100089	P26599_173	P26599	P26599100089	AAVDAGMA	173	A	A	V	D	A	G	M	A	13	769.859	2	-22	1539.72	31.371	41.3	6.4e-05	SerTyr-AGMAMAGQSPVLR	AGMAMAGQSPVLR		No
10000179368	100089	P16989_270	P16989	P16989100089	EMKDGVPE	270	E	M	K	D	G	V	P	E	14	565.624	3	-1.8	1696.87	28.581	38.6	5.1e-05	SerTyr-GVPEGAQLQGPVHR	GVPEGAQLQGPVHR		No
10000179370	100089	P33991_133	P33991	P33991100089	LQSDGAAA	133	L	Q	S	D	G	A	A	A	17	641.978	3	-5.8	1925.93	33.236	51.6	0.0002	SerTyr-GAAAEDIVASEQSLGQK	GAAAEDIVASEQSLGQK		No
10000179371	100089	Q07666_76	Q07666	Q07666100089	TGPDATVG	76	T	G	P	D	A	T	V	G	21	728.056	3	-9.7	2184.17	32.688	41.9	0.00023	SerTyr-ATVGGPAPTPLLPPSATASVK	ATVGGPAPTPLLPPSATASVK		No
10000179373	100089	O94888_401	O94888	O94888100089	EKADGVVE	401	E	K	A	D	G	V	V	E	12	717.357	2	-14	1434.71	30.641	44.6	0.00038	SerTyr-GVVEGIDVNGPK	GVVEGIDVNGPK		No
10000179374	100089	Q8WWM7_585	Q8WWM7	Q8WWM7100089	KEVDGLLT	585	K	E	V	D	G	L	L	T	15	870.409	2	-24	1740.82	32.131	41.1	0.00043	SerTyr-GLLTSEPMGSPVSSK	GLLTSEPMGSPVSSK		No
10000179376	100089	Q7L014_872	Q7L014	Q7L014100089	ESQDVMQQ	872	E	S	Q	D	V	M	Q	Q	11	498.926	3	-5.8	1496.78	33.524	37	0.00053	SerTyr-VMQQATNAILR	VMQQATNAILR		No
10000179377	100089	P47712_523	P47712	P47712100089	DELDAAVA	523	D	E	L	D	A	A	V	A	11	735.332	2	2.2	1470.66	29.808	46.4	0.0029	SerTyr-AAVADPDEFER	AAVADPDEFER		No
10000179380	100089	O95391_8	O95391	O95391100089	TVVDAVNA	8	T	V	V	D	A	V	N	A	11	632.83	2	0.11	1265.66	26.874	38.6	0.0033	SerTyr-AVNAAPLSGSK	AVNAAPLSGSK		No
10000179389	100089	P35579_1154	P35579	P35579100089	DTLDSTAA	1154	D	T	L	D	S	T	A	A	9	627.304	2	-8.7	1254.61	24.559	37.4	0.012	SerTyr-STAAQQELR	STAAQQELR		No
10000179392	100089	Q92619_40	Q92619	Q92619100089	DGADAVFP	40	D	G	A	D	A	V	F	P	18	649.653	3	-21	1948.96	33.543	33.8	0.0033	SerTyr-AVFPGPSLEPPAGSSGVK	AVFPGPSLEPPAGSSGVK		No
10000179393	100089	Q6PKG0_173	Q6PKG0	Q6PKG0100089	DFGDAINW	173	D	F	G	D	A	I	N	W	13	561.952	3	-4.6	1685.86	32.27	34.6	0.0052	SerTyr-AINWPTPGEIAHK	AINWPTPGEIAHK		No
10000179394	100089	Q14151_821	Q14151	Q14151100089	DSRDGWGG	821	D	S	R	D	G	W	G	G	9	588.746	2	-8.6	1177.49	27.212	35	0.0064	SerTyr-GWGGYGSDK	GWGGYGSDK	yes	No
10000179398	100089	Q13263_686	Q13263	Q13263100089	LSLDGADS	686	L	S	L	D	G	A	D	S	10	577.788	2	0.091	1155.58	23.972	33	0.011	SerTyr-GADSTGVVAK	GADSTGVVAK		No
10000179399	100089	Q9UQ35_1150	Q9UQ35	Q9UQ35100089	PTVDSNSL	1150	P	T	V	D	S	N	S	L	9	606.295	2	-16	1212.59	26.122	28.8	0.0025	SerTyr-SNSLLGQSR	SNSLLGQSR		No
10000179400	100089	P08670_260	P08670	P08670100089	IDVDVSKP	260	I	D	V	D	V	S	K	P	11	474.271	3	13	1422.81	30.101	32.9	0.016	SerTyr-VSKPDLTAALR	VSKPDLTAALR		No	TRUE
10000179405	100089	Q8NDC0_10	Q8NDC0	Q8NDC0100089	SLADALPE	10	S	L	A	D	A	L	P	E	9	400.544	3	9.4	1201.63	24.786	24.7	0.0012	SerTyr-ALPEHSPAK	ALPEHSPAK		No
10000179408	100089	Q92917_99	Q92917	Q92917100089	ALADGVVS	99	A	L	A	D	G	V	V	S	8	519.28	2	-9.9	1038.56	24.299	26.4	0.0063	SerTyr-GVVSQAVK	GVVSQAVK		No
10000179410	100089	Q8N573_539	Q8N573	Q8N573100089	TSADGHIE	539	T	S	A	D	G	H	I	E	10	435.568	3	3.2	1306.7	28.614	26.4	0.01	SerTyr-GHIESSALLK	GHIESSALLK		No
10000179416	100089	P46777_169	P46777	P46777100089	GAVDGGLS	169	G	A	V	D	G	G	L	S	10	416.226	3	15	1248.68	27.699	22.2	0.0067	SerTyr-GGLSIPHSTK	GGLSIPHSTK		No
10000179436	100124	P60709_158	P60709	P60709100124	DSGDGVTH	158	D	S	G	D	G	V	T	H	20	573.798	4	-34	2295.19	30.513	40.5	1.5e-05	Abu-GVTHTVPIYEGYALPHAILR	GVTHTVPIYEGYALPHAILR	yes	No	TRUE
10000179439	100124	P60709_52	P60709	P60709100124	GQKDSYVG	52	G	Q	K	D	S	Y	V	G	11	442.206	3	-34	1326.62	14.671	37.6	0.00088	Abu-SYVGDEAQSKR	SYVGDEAQSKR	yes	No	TRUE
10000179441	100124	P60709_245	P60709	P60709100124	ELPDGQVI	245	E	L	P	D	G	Q	V	I	10	586.295	2	-51	1172.59	17.399	40	0.0015	Abu-GQVITIGNER	GQVITIGNER	yes	No	TRUE
10000179510	100124	Q99733_9	Q99733	Q99733100124	SFSDGVPS	9	S	F	S	D	G	V	P	S	28	768.596	4	-46	3074.39	24.421	53.2	1.6e-10	Abu-GVPSDSVEAAKNASNTEKLTDQVMQNPR	GVPSDSVEAAKNASNTEKLTDQVMQNPR		No
10000179514	100124	Q99733_47	Q99733	Q99733100124	ERLDNVPH	47	E	R	L	D	N	V	P	H	15	589.955	3	-43	1769.87	23.814	27.7	0.003	Abu-NVPHTPSSYIETLPK	NVPHTPSSYIETLPK		No
10000179525	100124	P55209_58	P55209	P55209100124	ERLDGLVE	58	E	R	L	D	G	L	V	E	15	858.924	2	-44	1717.85	33.463	52.2	2e-06	Abu-GLVETPTGYIESLPR	GLVETPTGYIESLPR		No
10000179533	100124	Q14151_262	Q14151	Q14151100124	DLFDSAHP	262	D	L	F	D	S	A	H	P	23	613.77	4	-25	2455.08	16.621	54.3	7.8e-09	Abu-SAHPEEGDLDLASESTAHAQSSK	SAHPEEGDLDLASESTAHAQSSK	yes	No
10000179535	100124	Q14151_821	Q14151	Q14151100124	DSRDGWGG	821	D	S	R	D	G	W	G	G	10	389.845	3	-29	1169.53	15.697	32	0.00072	Abu-GWGGYGSDKR	GWGGYGSDKR	yes	No
10000179550	100124	P11171_551	P11171	P11171100124	AAVDSADR	551	A	A	V	D	S	A	D	R	31	630.909	5	-42	3154.55	18.726	62	1.1e-09	Abu-SADRSPRPTSAPAITQGQVAEGGVLDASAKK	SADRSPRPTSAPAITQGQVAEGGVLDASAKK		No	TRUE
10000179555	100124	P68363_34	P68363	P68363100124	IQPDGQMP	34	I	Q	P	D	G	Q	M	P	31	665.9	5	-25	3329.5	29.189	61.3	7.2e-09	Abu-GQMPSDKTIGGGDDSFNTFFSETGAGKHVPR	GQMPSDKTIGGGDDSFNTFFSETGAGKHVPR	yes	No	TRUE
10000179565	100124	P43243_764	P43243	P43243100124	ENADGQSD	764	E	N	A	D	G	Q	S	D	35	1020.72	4	-36	4082.86	37.532	49	3.1e-06	Abu-GQSDENKDDYTIPDEYRIGPYQPNVPVGIDYVIPK	GQSDENKDDYTIPDEYRIGPYQPNVPVGIDYVIPK		No
10000179566	100124	P43243_188	P43243	P43243100124	FRRDSFDD	188	F	R	R	D	S	F	D	D	20	583.8	4	36	2335.2	25.905	37.9	0.00017	Abu-SFDDRGPSLNPVLDYDHGSR	SFDDRGPSLNPVLDYDHGSR		No
10000179567	100124	P43243_681	P43243	P43243100124	DETDLANL	681	D	E	T	D	L	A	N	L	13	458.245	3	-16	1374.74	17.084	31.1	0.00047	Abu-LANLGDVASDGKK	LANLGDVASDGKK		No
10000179572	100124	P45974_783	P45974	P45974100124	SAADSISE	783	S	A	A	D	S	I	S	E	13	480.597	3	-31	1441.79	17.718	40.3	1.7e-05	Abu-SISESVPVGPKVR	SISESVPVGPKVR		No
10000179573	100124	P45974_768	P45974	P45974100124	DDLDAEAA	768	D	D	L	D	A	E	A	A	11	617.771	2	-31	1235.54	16.884	49.6	0.0001	Abu-AEAAMDISEGR	AEAAMDISEGR		No
10000179575	100124	Q27J81_1052	Q27J81	Q27J81100124	DLVDAVTP	1052	D	L	V	D	A	V	T	P	23	852.745	3	-47	2558.24	29.677	50.4	2.3e-07	Abu-AVTPGPQPTLEQLEEGGPRPLER	AVTPGPQPTLEQLEEGGPRPLER		No
10000179580	100124	P78347_908	P78347	P78347100124	VVVDGMPP	908	V	V	V	D	G	M	P	P	21	599.541	4	-36	2398.16	31.271	51.5	2e-07	Abu-GMPPGVSFKAPSYLEISSMRR	GMPPGVSFKAPSYLEISSMRR		No
10000179582	100124	Q9NRZ9_23	Q9NRZ9	Q9NRZ9100124	EQLDTAVI	23	E	Q	L	D	T	A	V	I	24	924.098	3	-41	2772.29	37.243	53.6	3.8e-07	Abu-TAVITPAMLEEEEQLEAAGLERER	TAVITPAMLEEEEQLEAAGLERER		No
10000179584	100124	Q7Z6Z7_3665	Q7Z6Z7	Q7Z6Z7100124	LSPDGLPE	3665	L	S	P	D	G	L	P	E	11	656.821	2	-30	1313.64	15.425	46	0.0033	Abu-GLPEEQPQTTK	GLPEEQPQTTK		No
10000179586	100124	Q7Z6Z7_2931	Q7Z6Z7	Q7Z6Z7100124	STRDSAVA	2931	S	T	R	D	S	A	V	A	11	559.769	2	-43	1119.54	15.285	38.4	0.0057	Abu-SAVAISGADSR	SAVAISGADSR		No
10000179587	100124	Q7Z6Z7_2474	Q7Z6Z7	Q7Z6Z7100124	DYPDMNAS	2474	D	Y	P	D	M	N	A	S	8	486.75	2	-37	973.501	16.534	29.6	0.0069	Abu-MNASPLVR	MNASPLVR		No
10000179590	100124	Q14444_95	Q14444	Q14444100124	DQLDAVSK	95	D	Q	L	D	A	V	S	K	16	642.644	3	-41	1927.93	24.181	47.4	1.9e-07	Abu-AVSKYQEVTNNLEFAK	AVSKYQEVTNNLEFAK		No
10000179609	100124	P55884_185	P55884	P55884100124	DGIDSVIV	185	D	G	I	D	S	V	I	V	18	683.687	3	-43	2051.06	26.499	56.4	3.1e-05	Abu-SVIVVDNVPQVGPDRLEK	SVIVVDNVPQVGPDRLEK		No
10000179618	100124	Q96T88_119	Q96T88	Q96T88100124	AETDSRPA	119	A	E	T	D	S	R	P	A	26	797.337	4	-44	3189.35	40.671	63.4	9.4e-12	Abu-SRPADEDMWDETELGLYKVNEYVDAR	SRPADEDMWDETELGLYKVNEYVDAR		No
10000179623	100124	P09874_215	P09874	P09874100124	DEVDGVDE	215	D	E	V	D	G	V	D	E	11	425.247	3	-17	1275.74	11.079	26.6	0.016	Abu-GVDEVAKKKSK	GVDEVAKKKSK		No
10000179624	100124	P12270_2148	P12270	P12270100124	HRTDGFAE	2148	H	R	T	D	G	F	A	E	16	574.29	3	-33	1722.87	23.382	43	2.5e-06	Abu-GFAEAIHSPQVAGVPR	GFAEAIHSPQVAGVPR		No
10000179630	100124	O95391_8	O95391	O95391100124	TVVDAVNA	8	T	V	V	D	A	V	N	A	23	512.654	5	-33	2563.27	18.357	45.8	1.9e-06	Abu-AVNAAPLSGSKEMSLEEPKKMTR	AVNAAPLSGSKEMSLEEPKKMTR		No
10000179637	100124	P26368_129	P26368	P26368100124	MTPDGLAV	129	M	T	P	D	G	L	A	V	18	947.983	2	-44	1895.97	28.212	50.6	0.00034	Abu-GLAVTPTPVPVVGSQMTR	GLAVTPTPVPVVGSQMTR		No
10000179638	100124	Q9H714_164	Q9H714	Q9H714100124	PETDSAFF	164	P	E	T	D	S	A	F	F	23	637.55	4	-31	2550.2	26.926	43.7	1.9e-05	Abu-SAFFEPSHLTSAADEGAVQVSRR	SAFFEPSHLTSAADEGAVQVSRR		No
10000179639	100124	Q9H714_111	Q9H714	Q9H714100124	DTTDSVGS	111	D	T	T	D	S	V	G	S	13	438.874	3	-16	1316.62	11.763	31.9	0.00035	Abu-SVGSASPHGSSEK	SVGSASPHGSSEK		No
10000179640	100124	O60711_6	O60711	O60711100124	EELDALLE	6	E	E	L	D	A	L	L	E	30	877.898	4	-42	3511.59	39.555	58.8	5e-10	Abu-ALLEELERSTLQDSDEYSNPAPLPLDQHSR	ALLEELERSTLQDSDEYSNPAPLPLDQHSR		No
10000179641	100124	Q9HCE5_30	Q9HCE5	Q9HCE5100124	ESADSIGA	30	E	S	A	D	S	I	G	A	19	551.026	4	-31	2204.1	21.825	53	1.8e-06	Abu-SIGAVLNSKDEQREIAETR	SIGAVLNSKDEQREIAETR		No
10000179644	100124	Q13263_689	Q13263	Q13263100124	DGADSTGV	689	D	G	A	D	S	T	G	V	14	504.941	3	-27	1514.82	15.936	41.4	0.00033	Abu-STGVVAKLSPANQR	STGVVAKLSPANQR		No
10000179648	100124	Q71RC2_574	Q71RC2	Q71RC2100124	VQKDGLNQ	574	V	Q	K	D	G	L	N	Q	19	689.347	3	-47	2068.04	19.766	49.3	5.6e-06	Abu-GLNQTTIPVSPPSTTKPSR	GLNQTTIPVSPPSTTKPSR		No
10000179759	100124	O15400_205	O15400	O15400100124	DVIDSIEA	205	D	V	I	D	S	I	E	A	22	850.396	3	-38	2551.19	30.715	64	4.3e-09	Abu-SIEANVENAEVHVQQANQQLSR	SIEANVENAEVHVQQANQQLSR		No
10000179760	100124	P09496_77	P09496	P09496100124	DAVDGVMN	77	D	A	V	D	G	V	M	N	26	979.39	3	-49	2938.17	29.942	59.6	4.4e-09	Abu-GVMNGEYYQESNGPTDSYAAISQVDR	GVMNGEYYQESNGPTDSYAAISQVDR		No
10000179761	100124	P18848_66	P18848	P18848100124	LAVDGLVS	66	L	A	V	D	G	L	V	S	23	866.366	3	-52	2599.1	31.875	52.6	4.5e-09	Abu-GLVSPSNNSKEDAFSGTDWMLEK	GLVSPSNNSKEDAFSGTDWMLEK		No
10000179762	100124	Q6JBY9_273	Q6JBY9	Q6JBY9100124	EEVDGQHP	273	E	E	V	D	G	Q	H	P	23	853.691	3	-44	2561.07	15.24	67.6	6.2e-09	Abu-GQHPAQEEVPESPQTSGPEAENR	GQHPAQEEVPESPQTSGPEAENR		No
10000179763	100124	Q68CP9_626	Q68CP9	Q68CP9100124	VRVDSVPD	626	V	R	V	D	S	V	P	D	27	710.335	4	-39	2841.34	22.942	56.7	6.4e-09	Abu-SVPDVSPAPSPAGIPHGSQTIGNHFQR	SVPDVSPAPSPAGIPHGSQTIGNHFQR		No
10000179764	100124	Q86XP1_699	Q86XP1	Q86XP1100124	SQTDSVPG	699	S	Q	T	D	S	V	P	G	20	702.361	3	-49	2107.08	25.606	54.4	7.2e-09	Abu-SVPGPAVAASKENLPVLNTR	SVPGPAVAASKENLPVLNTR		No
10000179767	100124	Q92598_548	Q92598	Q92598100124	VQTDAQQT	548	V	Q	T	D	A	Q	Q	T	29	806.9	4	7.1	3227.6	18.55	55	7.9e-09	Abu-AQQTSQSPPSPELTSEENKIPDADKANEK	AQQTSQSPPSPELTSEENKIPDADKANEK		No
10000179768	100124	Q8N1G4_526	Q8N1G4	Q8N1G4100124	TEADAVSG	526	T	E	A	D	A	V	S	G	29	1006.49	3	-46	3019.47	30.493	55.6	1.1e-08	Abu-AVSGQLPDPTTNPSAGKDGPSLLVVEQVR	AVSGQLPDPTTNPSAGKDGPSLLVVEQVR		No
10000179770	100124	Q8NCD3_92	Q8NCD3	Q8NCD3100124	DRTDGSVQ	92	D	R	T	D	G	S	V	Q	16	583.284	3	-28	1749.85	21.928	48.8	1.7e-08	Abu-GSVQAAAWGPELPSHR	GSVQAAAWGPELPSHR		No
10000179771	100124	Q8NFC6_2045	Q8NFC6	Q8NFC6100124	EECDGLMA	2045	E	E	C	D	G	L	M	A	25	840.385	3	-45	2521.15	19.992	67.3	1.8e-08	Abu-GLMATTASGDITNQNSLAGGKNQGK	GLMATTASGDITNQNSLAGGKNQGK		No
10000179774	100124	P26599_3	P26599	P26599100124	--MDGIVP	3	-	-	M	D	G	I	V	P	12	437.592	3	-12	1312.78	21.087	41.2	0.00018	Abu-GIVPDIAVGTKR	GIVPDIAVGTKR		No
10000179776	100124	P08670_86	P08670	P08670100124	DSVDFSLA	86	D	S	V	D	F	S	L	A	15	604.628	3	-34	1813.88	36.929	38.5	4.5e-05	Abu-FSLADAINTEFKNTR	FSLADAINTEFKNTR		No	TRUE
10000179777	100124	P08670_91	P08670	P08670100124	SLADAINT	91	S	L	A	D	A	I	N	T	10	426.883	3	-35	1280.65	15.366	38.4	0.0044	Abu-AINTEFKNTR	AINTEFKNTR		No	TRUE
10000179778	100124	Q02447_531	Q02447	Q02447100124	NSIDSAGI	531	N	S	I	D	S	A	G	I	19	678.317	3	-34	2034.95	19.554	49.1	3.5e-08	Abu-SAGIQLHPGENADSPADIR	SAGIQLHPGENADSPADIR		No
10000179779	100124	Q969V6_122	Q969V6	Q969V6100124	DSSDALSP	122	D	S	S	D	A	L	S	P	23	820.377	3	-40	2461.13	20.138	51.6	3.5e-08	Abu-ALSPEQPASHESQGSVPSPLEAR	ALSPEQPASHESQGSVPSPLEAR		No
10000179780	100124	Q93009_51	Q93009	Q93009100124	ALSDGHNT	51	A	L	S	D	G	H	N	T	16	659.916	3	-27	1979.75	19.869	45	4.2e-08	Abu-GHNTAEEDMEDDTSWR	GHNTAEEDMEDDTSWR		No
10000179781	100124	O75934_15	O75934	O75934100124	VVVDALPY	15	V	V	V	D	A	L	P	Y	27	1013.13	3	-37	3039.39	42.18	47.5	4.9e-08	Abu-ALPYFDQGYEAPGVREAAAALVEEETR	ALPYFDQGYEAPGVREAAAALVEEETR		No
10000179785	100124	P46087_208	P46087	P46087100124	EEADGGLQ	208	E	E	A	D	G	G	L	Q	31	1150.17	3	-50	3450.51	41.29	52.5	5.4e-08	Abu-GGLQINVDEEPFVLPPAGEMEQDAQAPDLQR	GGLQINVDEEPFVLPPAGEMEQDAQAPDLQR		No
10000179788	100124	O14974_886	O14974	O14974100124	TQTDSISR	886	T	Q	T	D	S	I	S	R	22	627.288	4	-35	2509.15	22.895	51	7.5e-08	Abu-SISRYETSSTSAGDRYDSLLGR	SISRYETSSTSAGDRYDSLLGR		No
10000179789	100124	Q92541_181	Q92541	Q92541100124	EFHDGYGE	181	E	F	H	D	G	Y	G	E	15	599.907	3	-36	1799.72	19.98	51.1	8.3e-08	Abu-GYGEDLMGDEEDRAR	GYGEDLMGDEEDRAR		No
10000179792	100124	Q92619_40	Q92619	Q92619100124	DGADAVFP	40	D	G	A	D	A	V	F	P	31	630.938	5	-21	3154.69	23.662	42.5	1.1e-07	Abu-AVFPGPSLEPPAGSSGVKATGTLKRPTSLSR	AVFPGPSLEPPAGSSGVKATGTLKRPTSLSR		No
10000179794	100124	P98171_404	P98171	P98171100124	DVLDSFQT	404	D	V	L	D	S	F	Q	T	21	757.668	3	-37	2273	16.85	49.1	1.6e-07	Abu-SFQTSPSTESLKSTSSDPGSR	SFQTSPSTESLKSTSSDPGSR		No
10000179795	100124	Q6P2E9_486	Q6P2E9	Q6P2E9100124	EENDSLGA	486	E	E	N	D	S	L	G	A	22	699.998	3	-38	2099.99	28.188	45.9	1.9e-07	Abu-SLGADGTHGAGAMESAAGVLIK	SLGADGTHGAGAMESAAGVLIK		No
10000179804	100124	Q8N3X1_154	Q8N3X1	Q8N3X1100124	AEIDAITA	154	A	E	I	D	A	I	T	A	26	867.436	3	-49	2602.31	20.069	50.4	3e-07	Abu-AITAPQPAAPVGASAPPPTPPRPEPK	AITAPQPAAPVGASAPPPTPPRPEPK		No
10000179806	100124	P35637_356	P35637	P35637100124	DWFDGKEF	356	D	W	F	D	G	K	E	F	16	456.489	4	-26	1825.95	20.882	39.2	0.00045	Abu-GKEFSGNPIKVSFATR	GKEFSGNPIKVSFATR		No
10000179809	100124	Q96HA7_499	Q96HA7	Q96HA7100124	DDTDGLTP	499	D	D	T	D	G	L	T	P	18	702.659	3	-40	2107.98	26.443	47.4	4.7e-07	Abu-GLTPQLEEDEELQGHLGR	GLTPQLEEDEELQGHLGR		No
10000179810	100124	Q8WYQ5_397	Q8WYQ5	Q8WYQ5100124	DEPDSMGA	397	D	E	P	D	S	M	G	A	28	920.738	3	-55	2762.21	25.999	47.2	5.6e-07	Abu-SMGADPGPPDEKDPLGAEAAPGALGQVK	SMGADPGPPDEKDPLGAEAAPGALGQVK		No
10000179811	100124	P33992_14	P33992	P33992100124	FYSDSFGG	14	F	Y	S	D	S	F	G	G	14	747.302	2	-44	1494.6	15.548	51.1	6.6e-07	Abu-SFGGDAQADEGQAR	SFGGDAQADEGQAR		No
10000179813	100124	Q14839_1234	Q14839	Q14839100124	EATDGGGD	1234	E	A	T	D	G	G	G	D	23	516.032	5	-22	2580.16	16.226	54.5	6.8e-07	Abu-GGGDNKEGEDSSVIHYDDKAIER	GGGDNKEGEDSSVIHYDDKAIER		No
10000179820	100124	Q07666_76	Q07666	Q07666100124	TGPDATVG	76	T	G	P	D	A	T	V	G	21	1009.01	2	-61	2018.02	26.024	52.5	1e-06	Abu-ATVGGPAPTPLLPPSATASVK	ATVGGPAPTPLLPPSATASVK		No
10000179825	100124	P46013_174	P46013	P46013100124	DSKDSVAQ	174	D	S	K	D	S	V	A	Q	17	456.464	4	-24	1825.86	13.769	34.7	6.7e-05	Abu-SVAQGTTNVHSSEHAGR	SVAQGTTNVHSSEHAGR		No
10000179826	100124	P46013_411	P46013	P46013100124	DAADSATK	411	D	A	A	D	S	A	T	K	13	376.706	4	-6.3	1506.82	13.105	30.1	0.0046	Abu-SATKPENLSSKTR	SATKPENLSSKTR		No
10000179827	100124	P32519_146	P32519	P32519100124	VTLDGIPE	146	V	T	L	D	G	I	P	E	14	850.901	2	-34	1701.8	23.517	49	1.3e-06	Abu-GIPEVMETQQVQEK	GIPEVMETQQVQEK		No
10000179828	100124	Q9NZB2_450	Q9NZB2	Q9NZB2100124	NHVDSAYF	450	N	H	V	D	S	A	Y	F	35	904.867	4	-44	3619.47	22.128	41.4	1.4e-06	Abu-SAYFPGSSTSSSSDNDEGSGGATNHISGNKIGWEK	SAYFPGSSTSSSSDNDEGSGGATNHISGNKIGWEK		No
10000179830	100124	P15170_40	P15170	P15170100124	SLGDGRPP	40	S	L	G	D	G	R	P	P	22	533.637	5	-28	2668.18	21.571	40.6	1.7e-06	Abu-GRPPEESAHEMMEEEEEIPKPK	GRPPEESAHEMMEEEEEIPKPK		No
10000179834	100124	Q12802_1642	Q12802	Q12802100124	ERVDSLVS	1642	E	R	V	D	S	L	V	S	18	554.251	4	-36	2217.01	25.201	41.3	2.2e-06	Abu-SLVSLSEEDLESDQREHR	SLVSLSEEDLESDQREHR		No
10000179836	100124	O75367_173	O75367	O75367100124	ASADSTTE	173	A	S	A	D	S	T	T	E	17	898.903	2	-52	1797.81	25.373	46.2	2.6e-06	Abu-STTEGTPADGFTVLSTK	STTEGTPADGFTVLSTK		No
10000179842	100124	P17028_10	P17028	P17028100124	VEEDSILI	10	V	E	E	D	S	I	L	I	16	651.024	3	-28	1953.07	35.334	53.5	3.5e-06	Abu-SILIIPTPDEEEKILR	SILIIPTPDEEEKILR		No
10000179843	100124	P33991_133	P33991	P33991100124	LQSDGAAA	133	L	Q	S	D	G	A	A	A	17	586.948	3	-32	1760.85	23.814	47.5	3.9e-06	Abu-GAAAEDIVASEQSLGQK	GAAAEDIVASEQSLGQK		No
10000179844	100124	Q5T8P6_432	Q5T8P6	Q5T8P6100124	YDTDGYNP	432	Y	D	T	D	G	Y	N	P	18	713.657	3	-33	2140.97	20.18	43.6	3.9e-06	Abu-GYNPEAPSITNTSRPMYR	GYNPEAPSITNTSRPMYR		No
10000179845	100124	P18583_154	P18583	P18583100124	LESDSFLK	154	L	E	S	D	S	F	L	K	19	731.364	3	-38	2194.09	36.402	46.4	4.6e-06	Abu-SFLKFDSEPSAVALELPTR	SFLKFDSEPSAVALELPTR		No
10000179853	100124	Q86VM9_362	Q86VM9	Q86VM9100124	DVRDTVLE	362	D	V	R	D	T	V	L	E	17	1110.96	2	-57	2221.92	34.763	44.6	7.6e-06	Abu-TVLEPYADPYYDYEIER	TVLEPYADPYYDYEIER		No
10000179855	100124	Q9P2N5_488	Q9P2N5	Q9P2N5100124	YEPDGYNP	488	Y	E	P	D	G	Y	N	P	14	760.836	2	-46	1521.67	17.748	46.9	1e-05	Abu-GYNPEAPSITSSGR	GYNPEAPSITSSGR		No
10000179856	100124	Q96IZ0_132	Q96IZ0	Q96IZ0100124	EEPDGVPE	132	E	E	P	D	G	V	P	E	14	481.255	3	-18	1443.76	11.776	50.1	1.1e-05	Abu-GVPEKGKSSGPSAR	GVPEKGKSSGPSAR		No
10000179857	100124	P23025_6	P23025	P23025100124	AAADGALP	6	A	A	A	D	G	A	L	P	20	692.341	3	-50	2077.02	31.791	50.5	1.2e-05	Abu-GALPEAAALEQPAELPASVR	GALPEAAALEQPAELPASVR		No
10000179860	100124	P49327_1166	P49327	P49327100124	PGLDGAQI	1166	P	G	L	D	G	A	Q	I	15	592.958	3	-42	1778.87	17.248	56.2	1.3e-05	Abu-GAQIPRDPSQQELPR	GAQIPRDPSQQELPR		No
10000179863	100124	Q16630_55	Q16630	Q16630100124	DYMDTLPP	55	D	Y	M	D	T	L	P	P	26	691.092	4	-38	2764.37	25.806	45.5	1.4e-05	Abu-TLPPTVGDDVGKGAAPNVVYTYTGKR	TLPPTVGDDVGKGAAPNVVYTYTGKR		No
10000179873	100124	Q14980_1830	Q14980	Q14980100124	EEPDSANS	1830	E	E	P	D	S	A	N	S	10	602.758	2	-41	1205.52	15.863	43	3.1e-05	Abu-SANSSFYSTR	SANSSFYSTR		No
10000179874	100124	O94973_691	O94973	O94973100124	VFSDSASV	691	V	F	S	D	S	A	S	V	18	936.921	2	-59	1873.84	25.681	49.9	3.2e-05	Abu-SASVVAPLAPGSEDNFAR	SASVVAPLAPGSEDNFAR		No
10000179878	100124	Q92917_38	Q92917	Q92917100124	DSGDGAGP	38	D	S	G	D	G	A	G	P	18	501.244	4	-35	2004.98	25.626	42.4	4.2e-05	Abu-GAGPSPEEKDFLKTVEGR	GAGPSPEEKDFLKTVEGR		No
10000179879	100124	Q8N684_30	Q8N684	Q8N684100124	DQIDLYDD	30	D	Q	I	D	L	Y	D	D	16	940.919	2	-30	1881.84	28.01	42.2	4.8e-05	Abu-LYDDVLTATSQPSDDR	LYDDVLTATSQPSDDR		No
10000179885	100124	O60508_205	O60508	O60508100124	DEKDVAKP	205	D	E	K	D	V	A	K	P	19	457.834	5	-25	2289.17	20.444	41.9	7.4e-05	Abu-VAKPSEEEQKELDEITAKR	VAKPSEEEQKELDEITAKR		No
10000179887	100124	P80723_166	P80723	P80723100124	TKSDGAPA	166	T	K	S	D	G	A	P	A	19	605.947	3	-24	1817.84	13.537	40.8	7.9e-05	Abu-GAPASDSKPGSSEAAPSSK	GAPASDSKPGSSEAAPSSK		No
10000179889	100124	Q96T58_1575	Q96T58	Q96T58100124	STTDSIQE	1575	S	T	T	D	S	I	Q	E	12	499.595	3	-34	1498.79	25.734	41.4	8.6e-05	Abu-SIQEPVVLFHSR	SIQEPVVLFHSR		No
10000179892	100124	Q5T4S7_2904	Q5T4S7	Q5T4S7100124	SAVDSVAG	2904	S	A	V	D	S	V	A	G	11	390.86	3	-18	1172.58	13.56	37.9	5.4e-05	Abu-SVAGEHSVSGR	SVAGEHSVSGR		No
10000179897	100124	Q13435_777	Q13435	Q13435100124	EAMDGSET	777	E	A	M	D	G	S	E	T	15	596.315	3	-21	1788.95	27.173	47.9	0.00018	Abu-GSETPQLFTVLPEKR	GSETPQLFTVLPEKR		No
10000179899	100124	P38159_319	P38159	P38159100124	SSRDGYGG	319	S	S	R	D	G	Y	G	G	13	488.541	3	-29	1465.62	14.882	29.2	0.00033	Abu-GYGGSRDSYSSSR	GYGGSRDSYSSSR	yes	No
10000179903	100124	Q6DN90_235	Q6DN90	Q6DN90100124	DFADAITE	235	D	F	A	D	A	I	T	E	11	668.808	2	-49	1337.62	34.188	40.7	0.00028	Abu-AITELEDAFSR	AITELEDAFSR		No
10000179904	100124	Q08J23_109	Q08J23	Q08J23100124	LEVDGQKV	109	L	E	V	D	G	Q	K	V	25	763.134	4	-12	3052.54	37.799	33.6	1.9e-05	Abu-GQKVEVPQPLSWYPEELAWHTNLSR	GQKVEVPQPLSWYPEELAWHTNLSR		No
10000179905	100124	Q7Z2W4_434	Q7Z2W4	Q7Z2W4100124	NNADGVAT	434	N	N	A	D	G	V	A	T	10	553.272	2	-44	1106.54	16.094	43.3	0.00031	Abu-GVATDITSTR	GVATDITSTR		No
10000179908	100124	P27816_9	P27816	P27816100124	SLADALTE	9	S	L	A	D	A	L	T	E	15	580.623	3	-37	1741.87	21.735	49.6	0.00041	Abu-ALTEPSPDIEGEIKR	ALTEPSPDIEGEIKR		No
10000179911	100124	O43865_6	O43865	O43865100124	SMPDAMPL	6	S	M	P	D	A	M	P	L	15	551.617	3	-41	1654.85	24.457	38.8	0.00025	Abu-AMPLPGVGEELKQAK	AMPLPGVGEELKQAK		No
10000179913	100124	P57764_88	P57764	P57764100124	DAMDGQIQ	88	D	A	M	D	G	Q	I	Q	16	819.89	2	-67	1639.78	19.722	44.9	0.00043	Abu-GQIQGSVELAAPGQAK	GQIQGSVELAAPGQAK		No
10000179914	100124	Q13601_39	Q13601	Q13601100124	TVPDGWKE	39	T	V	P	D	G	W	K	E	14	437.209	4	-28	1748.83	16.95	37.8	0.00027	Abu-GWKEPAFSKEDNPR	GWKEPAFSKEDNPR		No
10000179916	100124	Q8TEU7_1283	Q8TEU7	Q8TEU7100124	CSVDSMSA	1283	C	S	V	D	S	M	S	A	10	596.761	2	-40	1193.52	17.303	41	0.0011	Abu-SMSAALQDER	SMSAALQDER		No
10000179917	100124	P14316_238	P14316	P14316100124	ETTDSVPS	238	E	T	T	D	S	V	P	S	16	481.714	4	-32	1926.85	15.733	35.9	0.00019	Abu-SVPSDEESAEGRPHWR	SVPSDEESAEGRPHWR		No
10000179918	100124	Q86UX7_345	Q86UX7	Q86UX7100124	DVLDSLTT	345	D	V	L	D	S	L	T	T	13	402.724	4	-23	1610.9	24.104	37.4	0.00042	Abu-SLTTIPELKDHLR	SLTTIPELKDHLR		No
10000179920	100124	P17980_28	P17980	P17980100124	AEQDGIGE	28	A	E	Q	D	G	I	G	E	17	672.997	3	-44	2018.99	38.207	38.5	0.00077	Abu-GIGEEVLKMSTEEIIQR	GIGEEVLKMSTEEIIQR		No
10000179921	100124	P21333_1049	P21333	P21333100124	VTYDGVPV	1049	V	T	Y	D	G	V	P	V	23	597.582	4	-26	2390.33	27.729	32.5	6.3e-05	Abu-GVPVPGSPFPLEAVAPTKPSKVK	GVPVPGSPFPLEAVAPTKPSKVK		No
10000179922	100124	Q92945_129	Q92945	Q92945100124	SQGDSISS	129	S	Q	G	D	S	I	S	S	14	524.282	3	-25	1572.84	20.55	35.5	0.00023	Abu-SISSQLGPIHPPPR	SISSQLGPIHPPPR		No
10000179926	100124	O15042_738	O15042	O15042100124	DDLDGVPL	738	D	D	L	D	G	V	P	L	18	519.017	4	-19	2076.07	19.509	33.5	0.00017	Abu-GVPLDATEDSKKNEPIFK	GVPLDATEDSKKNEPIFK		No
10000179927	100124	Q9UQ35_1150	Q9UQ35	Q9UQ35100124	PTVDSNSL	1150	P	T	V	D	S	N	S	L	9	523.764	2	-37	1047.53	15.721	40.8	0.0028	Abu-SNSLLGQSR	SNSLLGQSR		No
10000179931	100124	Q2NL82_333	Q2NL82	Q2NL82100124	CATDAVDD	333	C	A	T	D	A	V	D	D	14	554.938	3	-27	1664.81	35.763	34.9	0.00048	Abu-AVDDMEEGLKVLMK	AVDDMEEGLKVLMK		No
10000179936	100124	O60315_158	O60315	O60315100124	EERDGHAV	158	E	E	R	D	G	H	A	V	12	496.242	3	-36	1488.73	24.849	37.1	0.0016	Abu-GHAVSIEEYLQR	GHAVSIEEYLQR		No
10000179938	100124	Q9BU89_9	Q9BU89	Q9BU89100124	QEVDAIGQ	9	Q	E	V	D	A	I	G	Q	16	607.325	3	-44	1821.97	21.559	35.5	0.00089	Abu-AIGQTLVDPKQPLQAR	AIGQTLVDPKQPLQAR		No
10000179948	100124	Q13813_1479	Q13813	Q13813100124	DSLDSVEA	1479	D	S	L	D	S	V	E	A	22	531.9	5	27	2659.5	25.866	36	0.0019	Abu-SVEALIKKHEDFDKAINVQEEK	SVEALIKKHEDFDKAINVQEEK		No	TRUE
10000179949	100124	P49792_1158	P49792	P49792100124	HETDGGSA	1158	H	E	T	D	G	G	S	A	28	606.3	5	13	3031.5	28.078	33.1	0.00057	Abu-GGSAHGDDDDDGPHFEPVVPLPDKIEVK	GGSAHGDDDDDGPHFEPVVPLPDKIEVK		No
10000179959	100124	Q8N9T8_313	Q8N9T8	Q8N9T8100124	EEPDSASV	313	E	E	P	D	S	A	S	V	9	365.202	3	-8.2	1095.61	14.173	32	0.00078	Abu-SASVKTYPR	SASVKTYPR		No
10000179964	100124	O95801_255	O95801	O95801100124	LFLDGLST	255	L	F	L	D	G	L	S	T	11	408.538	3	-10	1225.61	13.954	30.8	0.0015	Abu-GLSTENPHGAR	GLSTENPHGAR		No
10000179967	100124	P22102_206	P22102	P22102100124	CFTDGKTV	206	C	F	T	D	G	K	T	V	15	430.225	4	-22	1720.9	13.388	32.8	0.0043	Abu-GKTVAPMPPAQDHKR	GKTVAPMPPAQDHKR		No
10000179968	100124	P35658_7	P35658	P35658100124	DEMDAMIP	7	D	E	M	D	A	M	I	P	14	471.479	4	-20	1885.91	26.29	30.8	0.0025	Abu-AMIPEREMKDFQFR	AMIPEREMKDFQFR		No
10000179977	100124	Q6PKG0_173	Q6PKG0	Q6PKG0100124	DFGDAINW	173	D	F	G	D	A	I	N	W	13	506.92	3	-40	1520.76	26.197	28.8	0.0033	Abu-AINWPTPGEIAHK	AINWPTPGEIAHK		No
10000179980	100124	Q00653_11	Q00653	Q00653100124	PGLDGIIE	11	P	G	L	D	G	I	I	E	9	592.774	2	-36	1185.55	26.85	29.4	0.0069	Abu-GIIEYDDFK	GIIEYDDFK		No
10000179981	100124	P51572_165	P51572	P51572100124	AAVDGGKL	165	A	A	V	D	G	G	K	L	18	511.254	4	-28	2045.02	19.612	29.4	0.0074	Abu-GGKLDVGNAEVKLEEENR	GGKLDVGNAEVKLEEENR		No
10000179983	100124	Q9BUJ2_97	Q9BUJ2	Q9BUJ2100124	SGPDGHYA	97	S	G	P	D	G	H	Y	A	10	421.522	3	-33	1264.57	15.685	29.3	0.011	Abu-GHYAMDNITR	GHYAMDNITR		No
10000179989	100124	Q2KHR3_1322	Q2KHR3	Q2KHR3100124	IELDGLPS	1322	I	E	L	D	G	L	P	S	9	524.253	2	-45	1048.51	18.441	27.1	0.014	Abu-GLPSDQFAK	GLPSDQFAK		No
10000179993	100124	O43683_396	O43683	O43683100124	TVTDSMFA	396	T	V	T	D	S	M	F	A	8	463.231	2	-28	926.462	19.024	23.6	0.012	Abu-SMFAVASK	SMFAVASK		No
10000180001	100136	P60709_155	P60709	P60709100136	IVMDSGDG	155	I	V	M	D	S	G	D	G	23	638.565	4	-36	2554.26	53.552	42.2	2.1e-06	Abu-SGDGVTHTVPIYEGYALPHAILR	SGDGVTHTVPIYEGYALPHAILR	yes	No	TRUE
10000180005	100136	P60709_158	P60709	P60709100136	DSGDGVTH	158	D	S	G	D	G	V	T	H	20	573.802	4	-28	2295.21	53.492	36.7	9.6e-06	Abu-GVTHTVPIYEGYALPHAILR	GVTHTVPIYEGYALPHAILR	yes	No	TRUE
10000180007	100136	P60709_52	P60709	P60709100136	GQKDSYVG	52	G	Q	K	D	S	Y	V	G	11	442.211	3	-23	1326.63	18.925	45.3	4e-05	Abu-SYVGDEAQSKR	SYVGDEAQSKR	yes	No	TRUE
10000180009	100136	P60709_223	P60709	P60709100136	VALDFEQE	223	V	A	L	D	F	E	Q	E	16	600.939	3	-16	1802.82	42.011	43.4	6.4e-05	Abu-FEQEMATAASSSSLEK	FEQEMATAASSSSLEK	yes	No	TRUE
10000180018	100136	P60709_5	P60709	P60709100136	MDDDIAAL	5	M	D	D	D	I	A	A	L	14	760.853	2	-30	1521.71	43.104	31.6	0.00031	Abu-IAALVVDNGSGMC(Carboxymethyl)K	IAALVVDNGSGMCK		No	TRUE
10000180030	100136	P60709_245	P60709	P60709100136	ELPDGQVI	245	E	L	P	D	G	Q	V	I	10	586.306	2	-33	1172.61	30.194	35.8	0.0028	Abu-GQVITIGNER	GQVITIGNER	yes	No	TRUE
10000180266	100136	O43719_40	O43719	O43719100136	GEPDSLGQ	40	G	E	P	D	S	L	G	Q	18	736.015	3	-17	2208.04	44.944	55.5	1.3e-07	Abu-SLGQQPTDTPYEWDLDKK	SLGQQPTDTPYEWDLDKK		No
10000180267	100136	O43719_81	O43719	O43719100136	FSNDGASS	81	F	S	N	D	G	A	S	S	15	529.246	3	-20	1587.74	22.094	39.2	6.8e-07	Abu-GASSSTANVEDVHAR	GASSSTANVEDVHAR		No
10000180269	100136	O43719_34	O43719	O43719100136	TQTDAGGE	34	T	Q	T	D	A	G	G	E	24	911.403	3	-28	2734.21	48.294	42	2.3e-05	Abu-AGGEPDSLGQQPTDTPYEWDLDKK	AGGEPDSLGQQPTDTPYEWDLDKK		No
10000180279	100136	P21333_1049	P21333	P21333100136	VTYDGVPV	1049	V	T	Y	D	G	V	P	V	23	597.574	4	-39	2390.3	48.547	54.8	4e-08	Abu-GVPVPGSPFPLEAVAPTKPSKVK	GVPVPGSPFPLEAVAPTKPSKVK		No
10000180292	100136	P21333_1505	P21333	P21333100136	DNADGTQT	1505	D	N	A	D	G	T	Q	T	11	653.821	2	-31	1307.64	27.42	32.6	0.0011	Abu-GTQTVNYVPSR	GTQTVNYVPSR		No
10000180303	100136	P31943_341	P31943	P31943100136	THEDAVAA	341	T	H	E	D	A	V	A	A	15	436.471	4	-9.5	1745.88	18.447	30.1	0.00018	Abu-AVAAMSKDKANMQHR	AVAAMSKDKANMQHR		No
10000180305	100136	P31943_95	P31943	P31943100136	VEMDWVLK	95	V	E	M	D	W	V	L	K	22	513.857	5	-29	2569.29	43.297	33	0.00046	Abu-WVLKHTGPNSPDTANDGFVRLR	WVLKHTGPNSPDTANDGFVRLR		No
10000180306	100136	P31943_252	P31943	P31943100136	GYNDGYGF	252	G	Y	N	D	G	Y	G	F	8	472.211	2	-13	944.422	28.012	23.9	0.0013	Abu-GYGFGSDR	GYGFGSDR		No
10000180328	100136	P31942_145	P31942	P31942100136	DGYDGGYG	145	D	G	Y	D	G	G	Y	G	25	934.002	3	-32	2802.01	54.287	40.1	1.6e-07	Abu-GGYGGFDDYGGYNNYGYGNDGFDDR	GGYGGFDDYGGYNNYGYGNDGFDDR		No
10000180332	100136	P43243_764	P43243	P43243100136	ENADGQSD	764	E	N	A	D	G	Q	S	D	17	710.629	3	-25	2131.89	36.97	35.2	3.8e-07	Abu-GQSDENKDDYTIPDEYR	GQSDENKDDYTIPDEYR		No
10000180334	100136	P43243_681	P43243	P43243100136	DETDLANL	681	D	E	T	D	L	A	N	L	13	458.246	3	-14	1374.74	31.415	38.9	9.1e-06	Abu-LANLGDVASDGKK	LANLGDVASDGKK		No
10000180336	100136	P43243_188	P43243	P43243100136	FRRDSFDD	188	F	R	R	D	S	F	D	D	20	583.771	4	-13	2335.09	46.73	41.7	9.6e-06	Abu-SFDDRGPSLNPVLDYDHGSR	SFDDRGPSLNPVLDYDHGSR		No
10000180340	100136	P43243_453	P43243	P43243100136	AAVDYYTT	453	A	A	V	D	Y	Y	T	T	15	599.976	3	-42	1799.93	48.234	35.3	0.0001	Abu-YYTTTPALVFGKPVR	YYTTTPALVFGKPVR		No
10000180348	100136	P08670_86	P08670	P08670100136	DSVDFSLA	86	D	S	V	D	F	S	L	A	15	604.625	3	-38	1813.87	60.8	61	1.4e-07	Abu-FSLADAINTEFKNTR	FSLADAINTEFKNTR		No	TRUE
10000180349	100136	P08670_83	P08670	P08670100136	LLQDSVDF	83	L	L	Q	D	S	V	D	F	18	704.998	3	-36	2114.99	64.393	49.8	3.6e-06	Abu-SVDFSLADAINTEFKNTR	SVDFSLADAINTEFKNTR		No	TRUE
10000180355	100136	P08670_332	P08670	P08670100136	CEVDALKG	332	C	E	V	D	A	L	K	G	11	434.904	3	-2.4	1304.71	22.873	41.4	0.00024	Abu-ALKGTNESLER	ALKGTNESLER		No	TRUE
10000180356	100136	P08670_258	P08670	P08670100136	VQIDVDVS	258	V	Q	I	D	V	D	V	S	13	490.607	3	-17	1471.82	42.036	50	0.00025	Abu-VDVSKPDLTAALR	VDVSKPDLTAALR		No	TRUE
10000180358	100136	P08670_91	P08670	P08670100136	SLADAINT	91	S	L	A	D	A	I	N	T	10	426.891	3	-16	1280.67	27.015	38.6	0.00095	Abu-AINTEFKNTR	AINTEFKNTR		No	TRUE
10000180362	100136	P08670_260	P08670	P08670100136	IDVDVSKP	260	I	D	V	D	V	S	K	P	11	419.244	3	-16	1257.73	36.108	37.9	0.0036	Abu-VSKPDLTAALR	VSKPDLTAALR		No	TRUE
10000180392	100136	P68363_34	P68363	P68363100136	IQPDGQMP	34	I	Q	P	D	G	Q	M	P	31	665.9	5	-25	3329.5	50.841	62.1	5.4e-10	Abu-GQMPSDKTIGGGDDSFNTFFSETGAGKHVPR	GQMPSDKTIGGGDDSFNTFFSETGAGKHVPR	yes	No	TRUE
10000180396	100136	P68363_48	P68363	P68363100136	GGDDSFNT	48	G	G	D	D	S	F	N	T	17	492.485	4	-29	1969.94	47.252	42.9	2e-05	Abu-SFNTFFSETGAGKHVPR	SFNTFFSETGAGKHVPR	yes	No	TRUE
10000180399	100136	P68363_246	P68363	P68363100136	LRFDGALN	246	L	R	F	D	G	A	L	N	19	744.694	3	-44	2234.08	66.483	36.4	4.2e-05	Abu-GALNVDLTEFQTNLVPYPR	GALNVDLTEFQTNLVPYPR	yes	No	TRUE
10000180457	100136	Q14157_299	Q14157	Q14157100136	MENDSSNL	299	M	E	N	D	S	S	N	L	22	791.37	3	-48	2374.11	52.749	48.8	8.7e-07	Abu-SSNLDPSQAPSLAQPLVFSNSK	SSNLDPSQAPSLAQPLVFSNSK		No
10000180480	100136	P11142_226	P11142	P11142100136	TAGDTHLG	226	T	A	G	D	T	H	L	G	11	449.205	3	-8.9	1347.62	26.962	31.2	0.0036	Abu-THLGGEDFDNR	THLGGEDFDNR	yes	No
10000180481	100136	P11142_81	P11142	P11142100136	RFDDAVVQ	81	R	F	D	D	A	V	V	Q	22	520.3	5	61	2601.5	51.817	27.4	0.0039	Abu-AVVQSDMKHWPFMVVNDAGRPK	AVVQSDMKHWPFMVVNDAGRPK		No
10000180584	100136	P27816_9	P27816	P27816100136	SLADALTE	9	S	L	A	D	A	L	T	E	15	580.636	3	-14	1741.91	40.804	51.1	4e-05	Abu-ALTEPSPDIEGEIKR	ALTEPSPDIEGEIKR		No
10000180595	100136	Q13765_43	Q13765	Q13765100136	EEQDSTQA	43	E	E	Q	D	S	T	Q	A	24	858.06	3	-42	2574.18	46.806	46	8e-06	Abu-STQATTQQAQLAAAAEIDEEPVSK	STQATTQQAQLAAAAEIDEEPVSK		No
10000180627	100136	P22626_77	P22626	P22626100136	AEVDAAMA	77	A	E	V	D	A	A	M	A	13	479.91	3	-15	1439.73	20.87	34.9	0.00019	Abu-AAMAARPHSIDGR	AAMAARPHSIDGR		No
10000180634	100136	Q71RC2_574	Q71RC2	Q71RC2100136	VQKDGLNQ	574	V	Q	K	D	G	L	N	Q	19	689.362	3	-25	2068.09	37.566	54.5	8.9e-07	Abu-GLNQTTIPVSPPSTTKPSR	GLNQTTIPVSPPSTTKPSR		No
10000180647	100136	Q15365_221	Q15365	Q15365100136	PPLDAYSI	221	P	P	L	D	A	Y	S	I	17	642.989	3	-40	1928.97	47.238	53.5	4.8e-08	Abu-AYSIQGQHTISPLDLAK	AYSIQGQHTISPLDLAK		No
10000180660	100136	Q9BU89_9	Q9BU89	Q9BU89100136	QEVDAIGQ	9	Q	E	V	D	A	I	G	Q	16	607.33	3	-35	1821.99	39.777	59.9	1.9e-08	Abu-AIGQTLVDPKQPLQAR	AIGQTLVDPKQPLQAR		No
10000180672	100136	P26599_3	P26599	P26599100136	--MDGIVP	3	-	-	M	D	G	I	V	P	12	437.587	3	-25	1312.76	39.109	43.2	6.3e-05	Abu-GIVPDIAVGTKR	GIVPDIAVGTKR		No
10000180686	100136	P61978_347	P61978	P61978100136	ETWDSAID	347	E	T	W	D	S	A	I	D	31	1167.79	3	-36	3503.38	65.164	22.2	0.00023	Abu-SAIDTWSPSEWQMAYEPQGGSGYDYSYAGGR	SAIDTWSPSEWQMAYEPQGGSGYDYSYAGGR		No
10000180699	100136	P38159_284	P38159	P38159100136	SYRDSYES	284	S	Y	R	D	S	Y	E	S	9	574.239	2	-26	1148.48	23.921	33	0.00015	Abu-SYESYGNSR	SYESYGNSR	yes	No
10000180702	100136	P38159_234	P38159	P38159100136	DTRDYAPP	234	D	T	R	D	Y	A	P	P	11	495.237	3	-25	1485.71	28.565	28.4	0.0024	Abu-YAPPPRDYTYR	YAPPPRDYTYR	yes	No
10000180719	100136	P49321_20	P49321	P49321100136	VSADKIED	20	V	S	A	D	K	I	E	D	25	679.578	4	-25	2718.31	40.914	38.5	4.9e-06	Abu-KIEDVPAPSTSADKVESLDVDSEAK	KIEDVPAPSTSADKVESLDVDSEAK		No
10000180727	100136	P16989_270	P16989	P16989100136	EMKDGVPE	270	E	M	K	D	G	V	P	E	14	510.608	3	-6.8	1531.82	30.844	46.8	9.6e-07	Abu-GVPEGAQLQGPVHR	GVPEGAQLQGPVHR		No
10000180728	100136	P16989_145	P16989	P16989100136	VEFDVVEG	145	V	E	F	D	V	V	E	G	25	837.056	3	-40	2511.17	34.817	56.5	1.5e-06	Abu-VVEGEKGAEAANVTGPDGVPVEGSR	VVEGEKGAEAANVTGPDGVPVEGSR		No
10000180732	100136	P16989_138	P16989	P16989100136	SVGDGETV	138	S	V	G	D	G	E	T	V	13	761.84	2	-35	1523.68	44.194	27.4	0.002	Abu-GETVEFDVVEGEK	GETVEFDVVEGEK	yes	No
10000180733	100136	P16989_162	P16989	P16989100136	TGPDGVPV	162	T	G	P	D	G	V	P	V	8	443.247	2	7.9	886.493	20.771	17.3	0.003	Abu-GVPVEGSR	GVPVEGSR		No
10000180735	100136	P67809_113	P67809	P67809100136	VEFDVVEG	113	V	E	F	D	V	V	E	G	25	808.063	3	-34	2424.19	32.554	49.1	2.8e-07	Abu-VVEGEKGAEAANVTGPGGVPVQGSK	VVEGEKGAEAANVTGPGGVPVQGSK		No
10000180739	100136	O15042_738	O15042	O15042100136	DDLDGVPL	738	D	D	L	D	G	V	P	L	18	519.031	4	7.5	2076.12	34.076	45.1	8.7e-08	Abu-GVPLDATEDSKKNEPIFK	GVPLDATEDSKKNEPIFK		No
10000180741	100136	O15042_726	O15042	O15042100136	DDLDGVPI	726	D	D	L	D	G	V	P	I	23	828.729	3	-25	2486.19	54.843	38	9e-06	Abu-GVPIKSLDDDLDGVPLDATEDSK	GVPIKSLDDDLDGVPLDATEDSK		No
10000180744	100136	O15042_713	O15042	O15042100136	EDVDGIPI	713	E	D	V	D	G	I	P	I	18	967.478	2	-51	1934.96	61.445	40.2	0.00012	Abu-GIPIDATPIDDLDGVPIK	GIPIDATPIDDLDGVPIK		No
10000180753	100136	P18583_154	P18583	P18583100136	LESDSFLK	154	L	E	S	D	S	F	L	K	19	731.359	3	-45	2194.08	59.759	48.5	4e-07	Abu-SFLKFDSEPSAVALELPTR	SFLKFDSEPSAVALELPTR		No
10000180754	100136	P18583_1719	P18583	P18583100136	TLPDSGFS	1719	T	L	P	D	S	G	F	S	26	754.355	4	-42	3017.42	63.645	43	6.7e-07	Abu-SGFSANIEDINEADLVRPLLPKDMER	SGFSANIEDINEADLVRPLLPKDMER		No
10000180764	100136	P13639_612	P13639	P13639100136	PFPDGLAE	612	P	F	P	D	G	L	A	E	14	515.591	3	-22	1546.77	34.426	42.6	0.00011	Abu-GLAEDIDKGEVSAR	GLAEDIDKGEVSAR		No
10000180769	100136	P78559_1885	P78559	P78559100136	AEYDSVVA	1885	A	E	Y	D	S	V	V	A	26	916.763	3	-40	2750.29	69.236	53.3	3.6e-07	Abu-SVVAAVQEGAAELEGGPYSPLGKDYR	SVVAAVQEGAAELEGGPYSPLGKDYR		No
10000180777	100136	Q15003_381	Q15003	Q15003100136	DEPDHTAV	381	D	E	P	D	H	T	A	V	11	461.541	3	-27	1384.62	20.972	36.7	4.2e-06	Abu-HTAVGDHEEFR	HTAVGDHEEFR		No
10000180781	100136	Q15003_367	Q15003	Q15003100136	DFPDGSLG	367	D	F	P	D	G	S	L	G	25	708.279	4	-31	2833.12	41.538	29.7	0.00027	Abu-GSLGDDFDANDEPDHTAVGDHEEFR	GSLGDDFDANDEPDHTAVGDHEEFR		No
10000180782	100136	Q15003_200	Q15003	Q15003100136	HVADGSAT	200	H	V	A	D	G	S	A	T	10	534.247	2	-16	1068.49	15.824	34.2	0.00039	Abu-GSATEMGTTK	GSATEMGTTK		No
10000180803	100136	Q9Y5A9_167	Q9Y5A9	Q9Y5A9100136	AMIDGQSA	167	A	M	I	D	G	Q	S	A	27	955.096	3	-47	2865.29	57.097	62.1	3.7e-09	Abu-GQSAFANETLNKAPGMNTIDQGMAALK	GQSAFANETLNKAPGMNTIDQGMAALK		No
10000180805	100136	Q9Y5A9_368	Q9Y5A9	Q9Y5A9100136	NGVDGNGV	368	N	G	V	D	G	N	G	V	24	802.38	3	-18	2407.14	29.803	55.1	3.1e-08	Abu-GNGVGQSQAGSGSTPSEPHPVLEK	GNGVGQSQAGSGSTPSEPHPVLEK		No
10000180808	100136	Q15424_263	Q15424	Q15424100136	DLFDSAHP	263	D	L	F	D	S	A	H	P	23	613.771	4	-24	2455.09	32.315	61	2e-09	Abu-SAHPEEGDLDLASESTAHAQSSK	SAHPEEGDLDLASESTAHAQSSK	yes	No
10000180813	100136	Q15424_797	Q15424	Q15424100136	DSRDGWGG	797	D	S	R	D	G	W	G	G	10	389.851	3	-14	1169.55	26.245	28.6	0.002	Abu-GWGGYGSDKR	GWGGYGSDKR	yes	No
10000180817	100136	Q14151_184	Q14151	Q14151100136	HAVDGEGF	184	H	A	V	D	G	E	G	F	16	619.639	3	-20	1858.92	47.198	36	0.00018	Abu-GEGFKNTLETSSLNFK	GEGFKNTLETSSLNFK		No
10000180824	100136	Q13263_727	Q13263	Q13263100136	LATDSTFS	727	L	A	T	D	S	T	F	S	18	1009.98	2	-56	2019.97	64.588	37.5	0.001	Abu-STFSLDQPGGTLDLTLIR	STFSLDQPGGTLDLTLIR		No
10000180826	100136	Q13263_686	Q13263	Q13263100136	LSLDGADS	686	L	S	L	D	G	A	D	S	10	495.262	2	-9.3	990.524	18.039	22.7	0.013	Abu-GADSTGVVAK	GADSTGVVAK		No
10000180831	100136	Q9UQ35_148	Q9UQ35	Q9UQ35100136	SYVDGSSF	148	S	Y	V	D	G	S	S	F	8	489.727	2	-18	979.454	21.17	25.8	0.0036	Abu-GSSFDPQR	GSSFDPQR		No
10000180835	100136	Q9UQ35_1150	Q9UQ35	Q9UQ35100136	PTVDSNSL	1150	P	T	V	D	S	N	S	L	9	523.772	2	-22	1047.54	24.678	34.1	0.0079	Abu-SNSLLGQSR	SNSLLGQSR		No
10000180837	100136	Q13435_777	Q13435	Q13435100136	EAMDGSET	777	E	A	M	D	G	S	E	T	15	596.307	3	-35	1788.92	47.656	43.3	8.7e-06	Abu-GSETPQLFTVLPEKR	GSETPQLFTVLPEKR		No
10000180842	100136	Q13435_315	Q13435	Q13435100136	TEEDTVSV	315	T	E	E	D	T	V	S	V	11	454.268	3	-1.00	1362.8	10.32	38.1	0.0014	Abu-TVSVSKKEKNR	TVSVSKKEKNR		No
10000180884	100136	P49711_47	P49711	P49711100136	NQTDGGEV	47	N	Q	T	D	G	G	E	V	28	1064.47	3	-50	3193.4	77.815	49.5	8.9e-09	Abu-GGEVVQDVNSSVQMVMMEQLDPTLLQMK	GGEVVQDVNSSVQMVMMEQLDPTLLQMK		No
10000180894	100136	Q9UKY7_123	Q9UKY7	Q9UKY7100136	DPGDNWEE	123	D	P	G	D	N	W	E	E	14	725.286	2	-28	1450.57	29.478	33.7	3.7e-05	Abu-NWEEGGGGGGGMEK	NWEEGGGGGGGMEK		No
10000180896	100136	Q14103_70	Q14103	Q14103100136	AKIDASKN	70	A	K	I	D	A	S	K	N	16	457.95	4	-14	1831.8	10.743	42.4	6.6e-07	Abu-ASKNEEDEGHSNSSPR	ASKNEEDEGHSNSSPR		No
10000180900	100136	Q14498_332	Q14498	Q14498100136	ERTDASSA	332	E	R	T	D	A	S	S	A	15	849.875	2	-24	1699.75	46.719	49	9.8e-07	Abu-ASSASSFLDSDELER	ASSASSFLDSDELER		No
10000180908	100136	Q14566_275	Q14566	Q14566100136	SGVDGYET	275	S	G	V	D	G	Y	E	T	11	445.893	3	-28	1337.68	29.789	34	2.4e-05	Abu-GYETEGIRGLR	GYETEGIRGLR		No
10000180909	100136	Q14566_454	Q14566	Q14566100136	MLADNGVC	454	M	L	A	D	N	G	V	C	15	610.264	3	-14	1830.79	46.339	34.5	2.4e-05	Abu-NGVCCIDEFDKMDVR	NGVCCIDEFDKMDVR		No
10000180917	100136	O60610_649	O60610	O60610100136	LSGDATIP	649	L	S	G	D	A	T	I	P	38	918.5	4	-12	3674	68.365	35.9	0.012	Abu-ATIPPPPPLPEGVGIPSPSSLPGGTAIPPPPPLPGSAR	ATIPPPPPLPEGVGIPSPSSLPGGTAIPPPPPLPGSAR		No
10000180921	100136	P10809_505	P10809	P10809100136	VGYDAMAG	505	V	G	Y	D	A	M	A	G	12	698.821	2	-18	1397.64	51.779	38	0.00038	Abu-AMAGDFVNMVEK	AMAGDFVNMVEK		No
10000180923	100136	P10809_453	P10809	P10809100136	PALDSLTP	453	P	A	L	D	S	L	T	P	10	594.279	2	-33	1188.56	20.526	40	0.0057	Abu-SLTPANEDQK	SLTPANEDQK		No
10000180924	100136	P10809_112	P10809	P10809100136	EAGDGTTT	112	E	A	G	D	G	T	T	T	10	538.3	2	-16	1076.6	24.905	30.1	0.0085	Abu-GTTTATVLAR	GTTTATVLAR		No
10000180955	100136	O15027_838	O15027	O15027100136	SHSDSLAS	838	S	H	S	D	S	L	A	S	13	484.917	3	-14	1454.75	22.323	39.5	5.2e-05	Abu-SLASQQSVASHPR	SLASQQSVASHPR		No
10000180956	100136	O15027_342	O15027	O15027100136	VHPDSVSS	342	V	H	P	D	S	V	S	S	9	522.747	2	-7.7	1045.49	19.322	36.5	0.00021	Abu-SVSSSYSSR	SVSSSYSSR		No
10000180973	100136	Q2NL82_333	Q2NL82	Q2NL82100136	CATDAVDD	333	C	A	T	D	A	V	D	D	14	560.275	3	-16	1680.83	43.825	46.7	2.1e-07	Abu-AVDDM(Oxidation)EEGLKVLMK	AVDDMEEGLKVLMK		No
10000180978	100136	P33991_133	P33991	P33991100136	LQSDGAAA	133	L	Q	S	D	G	A	A	A	17	586.957	3	-17	1760.87	43.631	46.9	1.3e-06	Abu-GAAAEDIVASEQSLGQK	GAAAEDIVASEQSLGQK		No
10000180981	100136	P33991_568	P33991	P33991100136	VLSDNGIC	568	V	L	S	D	N	G	I	C	17	687.284	3	-25	2061.85	45.561	41.6	6.1e-05	Abu-NGICCIDEFDKMNESTR	NGICCIDEFDKMNESTR		No
10000180996	100136	P27797_259	P27797	P27797100136	EEMDGEWE	259	E	E	M	D	G	E	W	E	20	631.807	4	-22	2527.23	49.527	51.1	5.3e-07	Abu-GEWEPPVIQNPEYKGEWKPR	GEWEPPVIQNPEYKGEWKPR		No
10000180999	100136	P27797_329	P27797	P27797100136	TIFDNFLI	329	T	I	F	D	N	F	L	I	23	911.731	3	-33	2735.19	69.078	34.9	0.0021	Abu-NFLITNDEAYAEEFGNETWGVTK	NFLITNDEAYAEEFGNETWGVTK		No
10000181000	100136	Q14444_95	Q14444	Q14444100136	DQLDAVSK	95	D	Q	L	D	A	V	S	K	16	642.657	3	-20	1927.97	44.229	51.8	4.3e-07	Abu-AVSKYQEVTNNLEFAK	AVSKYQEVTNNLEFAK		No
10000181044	100136	P46087_208	P46087	P46087100136	EEADGGLQ	208	E	E	A	D	G	G	L	Q	31	1155.53	3	-27	3466.59	63.234	52	6.4e-08	Abu-GGLQINVDEEPFVLPPAGEM(Oxidation)EQDAQAPDLQR	GGLQINVDEEPFVLPPAGEMEQDAQAPDLQR		No
10000181048	100136	Q5JTH9_1162	Q5JTH9	Q5JTH9100136	EEADGNKM	1162	E	E	A	D	G	N	K	M	27	788.827	4	-27	3155.31	47.756	41.8	1e-05	Abu-GNKM(Oxidation)EEEEGAKGEDEEMADPMEDVIIR	GNKMEEEEGAKGEDEEMADPMEDVIIR		No
10000181052	100136	Q5JTH9_557	Q5JTH9	Q5JTH9100136	LEIDGSEE	557	L	E	I	D	G	S	E	E	10	618.286	2	-21	1236.57	39.519	27.6	0.0013	Abu-GSEETLDFPR	GSEETLDFPR		No
10000181054	100136	Q8NFC6_2045	Q8NFC6	Q8NFC6100136	EECDGLMA	2045	E	E	C	D	G	L	M	A	25	840.403	3	-23	2521.21	38.226	53.2	1.7e-07	Abu-GLMATTASGDITNQNSLAGGKNQGK	GLMATTASGDITNQNSLAGGKNQGK		No
10000181055	100136	Q8NFC6_1484	Q8NFC6	Q8NFC6100136	SEVDTSAG	1484	S	E	V	D	T	S	A	G	15	513.928	3	-11	1541.78	22.785	40.2	1.1e-06	Abu-TSAGSGSAPSVLHQR	TSAGSGSAPSVLHQR		No
10000181078	100136	O75533_35	O75533	O75533100136	VGLDSTGY	35	V	G	L	D	S	T	G	Y	16	941.867	2	-44	1883.73	38.655	46.5	2.1e-08	Abu-STGYYDQEIYGGSDSR	STGYYDQEIYGGSDSR		No
10000181087	100136	P35637_356	P35637	P35637100136	DWFDGKEF	356	D	W	F	D	G	K	E	F	16	456.489	4	-26	1825.96	40.064	31.6	0.00021	Abu-GKEFSGNPIKVSFATR	GKEFSGNPIKVSFATR		No
10000181097	100136	Q96T88_119	Q96T88	Q96T88100136	AETDSRPA	119	A	E	T	D	S	R	P	A	26	797.4	4	34	3189.6	67.138	60.3	1.7e-09	Abu-SRPADEDMWDETELGLYKVNEYVDAR	SRPADEDMWDETELGLYKVNEYVDAR		No
10000181100	100136	P45974_768	P45974	P45974100136	DDLDAEAA	768	D	D	L	D	A	E	A	A	11	625.766	2	-35	1251.53	28.816	45	1.9e-06	Abu-AEAAM(Oxidation)DISEGR	AEAAMDISEGR		No
10000181102	100136	P45974_783	P45974	P45974100136	SAADSISE	783	S	A	A	D	S	I	S	E	13	480.607	3	-9.9	1441.82	34.497	32.1	0.00028	Abu-SISESVPVGPKVR	SISESVPVGPKVR		No
10000181109	100136	O43865_74	O43865	O43865100136	SSTDSYSS	74	S	S	T	D	S	Y	S	S	19	1054.91	2	-41	2109.81	35.079	45.8	7.1e-09	Abu-SYSSAASYTDSSDDEVSPR	SYSSAASYTDSSDDEVSPR		No
10000181110	100136	O43865_6	O43865	O43865100136	SMPDAMPL	6	S	M	P	D	A	M	P	L	15	551.625	3	-27	1654.87	44.591	51.6	7.8e-06	Abu-AMPLPGVGEELKQAK	AMPLPGVGEELKQAK		No
10000181124	100136	Q99081_23	Q99081	Q99081100136	DLLDFSAM	23	D	L	L	D	F	S	A	M	13	727.337	2	-32	1454.67	48.223	28.4	0.0083	Abu-FSAMFSPPVNSGK	FSAMFSPPVNSGK		No
10000181130	100136	P14317_27	P14317	P14317100136	TDPDFVND	27	T	D	P	D	F	V	N	D	11	483.906	3	-20	1451.72	27.996	46.6	0.00048	Abu-FVNDISEKEQR	FVNDISEKEQR		No
10000181133	100136	Q9Y5S9_7	Q9Y5S9	Q9Y5S9100136	DVLDLHEA	7	D	V	L	D	L	H	E	A	21	597.486	4	-36	2389.95	36.447	47.7	2.3e-10	Abu-LHEAGGEDFAMDEDGDESIHK	LHEAGGEDFAMDEDGDESIHK		No
10000181139	100136	P06733_204	P06733	P06733100136	YGKDATNV	204	Y	G	K	D	A	T	N	V	25	905.104	3	-40	2715.31	61.358	34.6	0.001	Abu-ATNVGDEGGFAPNILENKEGLELLK	ATNVGDEGGFAPNILENKEGLELLK		No
10000181145	100136	Q96D71_518	Q96D71	Q96D71100136	SSSDSFTS	518	S	S	S	D	S	F	T	S	15	861.89	2	-32	1723.78	40.403	55.8	9.8e-07	Abu-SFTSDPEQIGSNVTR	SFTSDPEQIGSNVTR		No
10000181146	100136	Q96D71_512	Q96D71	Q96D71100136	TVADGYSS	512	T	V	A	D	G	Y	S	S	21	773.661	3	-29	2320.98	45.155	48.5	2.1e-06	Abu-GYSSSDSFTSDPEQIGSNVTR	GYSSSDSFTSDPEQIGSNVTR		No
10000181147	100136	Q96D71_439	Q96D71	Q96D71100136	TQFDSNIA	439	T	Q	F	D	S	N	I	A	19	690.031	3	-19	2070.09	43.905	48.9	2.3e-06	Abu-SNIAPADPDTAIVHPVPIR	SNIAPADPDTAIVHPVPIR		No
10000181161	100136	Q99733_9	Q99733	Q99733100136	SFSDGVPS	9	S	F	S	D	G	V	P	S	18	630.292	3	-33	1890.88	28.812	61.9	4.3e-08	Abu-GVPSDSVEAAKNASNTEK	GVPSDSVEAAKNASNTEK		No
10000181167	100136	Q9UBC2_570	Q9UBC2	Q9UBC2100136	QVLDGAHG	570	Q	V	L	D	G	A	H	G	22	751.688	3	-44	2255.06	57.17	54.4	6e-05	Abu-GAHGASLTDLANLSEGVSLAER	GAHGASLTDLANLSEGVSLAER		No
10000181180	100136	Q08J23_109	Q08J23	Q08J23100136	LEVDGQKV	109	L	E	V	D	G	Q	K	V	25	763.106	4	-50	3052.42	63.096	36.7	2.5e-05	Abu-GQKVEVPQPLSWYPEELAWHTNLSR	GQKVEVPQPLSWYPEELAWHTNLSR		No
10000181203	100136	O95391_8	O95391	O95391100136	TVVDAVNA	8	T	V	V	D	A	V	N	A	19	681.669	3	-24	2045.01	38.289	50.8	3.3e-07	Abu-AVNAAPLSGSKEMSLEEPK	AVNAAPLSGSKEMSLEEPK		No
10000181208	100136	Q13177_149	Q13177	Q13177100136	PEKDGFPS	149	P	E	K	D	G	F	P	S	12	622.819	2	-26	1245.64	37.523	42.6	2.9e-05	Abu-GFPSGTPALNAK	GFPSGTPALNAK		No
10000181209	100136	Q13177_90	Q13177	Q13177100136	VGFDAVTG	90	V	G	F	D	A	V	T	G	15	882.89	2	-37	1765.78	53.106	46.1	6e-05	Abu-AVTGEFTGMPEQWAR	AVTGEFTGMPEQWAR	yes	No
10000181213	100136	P55884_185	P55884	P55884100136	DGIDSVIV	185	D	G	I	D	S	V	I	V	18	683.698	3	-27	2051.09	47.297	44	0.00024	Abu-SVIVVDNVPQVGPDRLEK	SVIVVDNVPQVGPDRLEK		No
10000181214	100136	P55884_4	P55884	P55884100136	-MQDAENV	4	-	M	Q	D	A	E	N	V	13	735.345	2	-28	1470.69	31.398	42.1	0.002	Abu-AENVAVPEAAEER	AENVAVPEAAEER		No
10000181218	100136	P36915_344	P36915	P36915100136	QQTDSAME	344	Q	Q	T	D	S	A	M	E	12	702.793	2	-45	1405.59	22.484	41.7	3.6e-05	Abu-SAM(Oxidation)EPTGPTQER	SAMEPTGPTQER		No
10000181234	100136	P52566_20	P52566	P52566100136	DELDSKLN	20	D	E	L	D	S	K	L	N	14	429.006	4	-1.6	1716.02	22.664	31.5	0.00036	Abu-SKLNYKPPPQKSLK	SKLNYKPPPQKSLK		No
10000181237	100136	P35251_724	P35251	P35251100136	DEVDGMAG	724	D	E	V	D	G	M	A	G	19	691.337	3	-40	2074.01	63.848	39.5	7.5e-07	Abu-GM(Oxidation)AGNEDRGGIQELIGLIK	GMAGNEDRGGIQELIGLIK		No
10000181245	100136	Q92541_181	Q92541	Q92541100136	EFHDGYGE	181	E	F	H	D	G	Y	G	E	15	599.914	3	-24	1799.74	37.576	49.9	1.3e-07	Abu-GYGEDLMGDEEDRAR	GYGEDLMGDEEDRAR		No
10000181251	100136	Q8IVH2_407	Q8IVH2	Q8IVH2100136	SFPDGLVH	407	S	F	P	D	G	L	V	H	33	636.93	5	-37	3184.65	45.575	42	9.5e-06	Abu-GLVHPPTSAAAPVTPLRPPGLGSASLHGGGPAR	GLVHPPTSAAAPVTPLRPPGLGSASLHGGGPAR		No
10000181258	100136	P35579_1154	P35579	P35579100136	DTLDSTAA	1154	D	T	L	D	S	T	A	A	9	544.779	2	-18	1089.56	20.24	30.4	0.002	Abu-STAAQQELR	STAAQQELR		No
10000181262	100136	Q13428_1243	Q13428	Q13428100136	DDPDGKQE	1243	D	D	P	D	G	K	Q	E	17	618.659	3	-15	1855.98	24.57	53.9	2.3e-06	Abu-GKQEAKPQQAAGMLSPK	GKQEAKPQQAAGMLSPK		No
10000181264	100136	Q13428_1102	Q13428	Q13428100136	SGVDSAVG	1102	S	G	V	D	S	A	V	G	19	957.977	2	-35	1915.95	33.366	42.1	0.00098	Abu-SAVGTLPATSPQSTSVQAK	SAVGTLPATSPQSTSVQAK		No
10000181282	100136	Q12802_545	Q12802	Q12802100136	SSLDGNKP	545	S	S	L	D	G	N	K	P	28	772.338	4	-36	3089.35	37.33	44.8	3.4e-05	Abu-GNKPAESSLAFSNEETSTEKTAETETSR	GNKPAESSLAFSNEETSTEKTAETETSR		No
10000181284	100136	Q12802_830	Q12802	Q12802100136	DGPDGNSN	830	D	G	P	D	G	N	S	N	14	562.251	3	-30	1686.75	24.122	31.1	9.7e-05	Abu-GNSNEPDTRPLEDR	GNSNEPDTRPLEDR		No
10000181285	100136	Q12802_906	Q12802	Q12802100136	LALDSVLT	906	L	A	L	D	S	V	L	T	8	474.243	2	-27	948.487	21.669	31.4	0.0063	Abu-SVLTEEGK	SVLTEEGK		No
10000181286	100136	P00558_286	P00558	P00558100136	LPVDFVTA	286	L	P	V	D	F	V	T	A	12	490.574	3	-14	1471.72	32.113	44.4	6.6e-06	Abu-FVTADKFDENAK	FVTADKFDENAK		No
10000181287	100136	P00558_69	P00558	P00558100136	GRPDGVPM	69	G	R	P	D	G	V	P	M	18	686.348	3	-33	2059.05	54.52	40.4	0.00012	Abu-GVPMPDKYSLEPVAVELK	GVPMPDKYSLEPVAVELK		No
10000181289	100136	P00558_160	P00558	P00558100136	KLGDVYVN	160	K	L	G	D	V	Y	V	N	12	478.905	3	-8.1	1436.72	35.431	24.9	0.0063	Abu-VYVNDAFGTAHR	VYVNDAFGTAHR	yes	No
10000181291	100136	Q7Z2W4_492	Q7Z2W4	Q7Z2W4100136	LVNDSLSD	492	L	V	N	D	S	L	S	D	12	663.316	2	-22	1326.63	30.099	45.2	0.00026	Abu-SLSDVTSTTSSR	SLSDVTSTTSSR		No
10000181292	100136	Q7Z2W4_434	Q7Z2W4	Q7Z2W4100136	NNADGVAT	434	N	N	A	D	G	V	A	T	10	553.284	2	-21	1106.57	28.139	38	0.00091	Abu-GVATDITSTR	GVATDITSTR		No
10000181299	100136	Q13151_63	Q13151	Q13151100136	EEADAAMA	63	E	E	A	D	A	A	M	A	19	506.509	4	-12	2026.04	30.267	47	3.8e-07	Abu-AAMAASPHAVDGNTVELKR	AAMAASPHAVDGNTVELKR		No
10000181320	100136	P07737_82	P07737	P07737100136	LLQDGEFS	82	L	L	Q	D	G	E	F	S	8	520.244	2	-7.6	1040.49	40.848	30.1	0.002	Abu-GEFSMDLR	GEFSMDLR		No
10000181321	100136	P07737_20	P07737	P07737100136	TCQDAAIV	20	T	C	Q	D	A	A	I	V	19	667.672	3	-39	2003.02	47.898	28.8	0.0029	Abu-AAIVGYKDSPSVWAAVPGK	AAIVGYKDSPSVWAAVPGK		No
10000181325	100136	P52747_195	P52747	P52747100136	VSIDGSES	195	V	S	I	D	G	S	E	S	19	679.302	3	-34	2037.9	28.1	53.7	1e-06	Abu-GSESVAGTGMIGENEQEKK	GSESVAGTGMIGENEQEKK		No
10000181326	100136	P52747_164	P52747	P52747100136	IQADGTVA	164	I	Q	A	D	G	T	V	A	27	934.106	3	-34	2802.32	62.405	46	6.1e-06	Abu-GTVAGLHTGDATIDPDTISALEQYAAK	GTVAGLHTGDATIDPDTISALEQYAAK		No
10000181328	100136	Q96PK2_2229	Q96PK2	Q96PK2100136	DTTDGYMG	2229	D	T	T	D	G	Y	M	G	11	639.802	2	-14	1279.6	28.854	37.5	5.3e-06	Abu-GYMGVNQAPEK	GYMGVNQAPEK	yes	No
10000181330	100136	Q96PK2_3523	Q96PK2	Q96PK2100136	DAPDGSDA	3523	D	A	P	D	G	S	D	A	22	838.072	3	-26	2514.22	70.989	33	0.00032	Abu-GSDASQLLHQAEVAQQEFLEVK	GSDASQLLHQAEVAQQEFLEVK	yes	No
10000181339	100136	P23634_1081	P23634	P23634100136	DEIDHAEM	1081	D	E	I	D	H	A	E	M	8	376.193	3	-12	1128.58	19.562	21.1	0.014	Abu-HAEMELRR	HAEMELRR		No
10000181341	100136	O75995_116	O75995	O75995100136	TSPDYSLD	116	T	S	P	D	Y	S	L	D	10	589.269	2	-37	1178.54	28.175	34.4	1.3e-05	Abu-YSLDSPGPEK	YSLDSPGPEK		No
10000181343	100136	O60841_21	O60841	O60841100136	IDLDALAA	21	I	D	L	D	A	L	A	A	19	665.991	3	-39	1997.97	38.072	58.6	1.5e-06	Abu-ALAAEIEGAGAAKEQEPQK	ALAAEIEGAGAAKEQEPQK		No
10000181349	100136	Q6P2E9_663	Q6P2E9	Q6P2E9100136	LQLDGSLT	663	L	Q	L	D	G	S	L	T	16	825.876	2	-40	1651.75	34.731	35.5	6e-07	Abu-GSLTMSSSGSLQASPR	GSLTMSSSGSLQASPR		No
10000181350	100136	Q6P2E9_486	Q6P2E9	Q6P2E9100136	EENDSLGA	486	E	E	N	D	S	L	G	A	22	700.003	3	-31	2100.01	49.577	51.3	1.7e-06	Abu-SLGADGTHGAGAMESAAGVLIK	SLGADGTHGAGAMESAAGVLIK		No
10000181351	100136	Q6P2E9_797	Q6P2E9	Q6P2E9100136	LGLDGGPG	797	L	G	L	D	G	G	P	G	39	1036.5	4	-5.6	4146	64.415	25.2	0.001	Abu-GGPGDGDRHNTPSLLEAALTQEASTPDSQVWPTAPDITR	GGPGDGDRHNTPSLLEAALTQEASTPDSQVWPTAPDITR		No
10000181352	100136	P49792_2491	P49792	P49792100136	DVADATSE	2491	D	V	A	D	A	T	S	E	16	869.393	2	-34	1738.79	26.652	48.6	7.7e-07	Abu-ATSEVEVSSTSETTPK	ATSEVEVSSTSETTPK		No
10000181353	100136	P49792_1158	P49792	P49792100136	HETDGGSA	1158	H	E	T	D	G	G	S	A	28	606.3	5	13	3031.5	40.872	30.1	0.0027	Abu-GGSAHGDDDDDGPHFEPVVPLPDKIEVK	GGSAHGDDDDDGPHFEPVVPLPDKIEVK		No
10000181354	100136	P49792_2237	P49792	P49792100136	ALDDSVSS	2237	A	L	D	D	S	V	S	S	19	492.763	4	-11	1971.05	28.722	33.6	0.0028	Abu-SVSSSSVHASPLASSPVRK	SVSSSSVHASPLASSPVRK	yes	No
10000181355	100136	P49792_3132	P49792	P49792100136	TKHDGTGG	3132	T	K	H	D	G	T	G	G	20	764.322	3	-42	2292.97	44.424	24.6	0.0045	Abu-GTGGQSIYGDKFEDENFDVK	GTGGQSIYGDKFEDENFDVK		No
10000181389	100136	Q92917_38	Q92917	Q92917100136	DSGDGAGP	38	D	S	G	D	G	A	G	P	18	501.256	4	-10	2005.03	47.026	52.8	1.7e-08	Abu-GAGPSPEEKDFLKTVEGR	GAGPSPEEKDFLKTVEGR		No
10000181396	100136	Q02447_531	Q02447	Q02447100136	NSIDSAGI	531	N	S	I	D	S	A	G	I	19	678.322	3	-26	2034.97	36.205	53.4	1e-07	Abu-SAGIQLHPGENADSPADIR	SAGIQLHPGENADSPADIR		No
10000181408	100136	Q07666_76	Q07666	Q07666100136	TGPDATVG	76	T	G	P	D	A	T	V	G	21	1009.02	2	-47	2018.05	45.253	51	1.7e-07	Abu-ATVGGPAPTPLLPPSATASVK	ATVGGPAPTPLLPPSATASVK		No
10000181413	100136	Q8IWZ3_5	Q8IWZ3	Q8IWZ3100136	MLTDSGGG	5	M	L	T	D	S	G	G	G	18	933.377	2	-56	1866.75	50.859	22	0.00032	Abu-SGGGGTSFEEDLDSVAPR	SGGGGTSFEEDLDSVAPR		No
10000181420	100136	P49736_89	P49736	P49736100136	PELDAYEA	89	P	E	L	D	A	Y	E	A	22	837.02	3	-44	2511.06	58.745	35.4	0.00015	Abu-AYEAEGLALDDEDVEELTASQR	AYEAEGLALDDEDVEELTASQR		No
10000181422	100136	P49736_69	P49736	P49736100136	EEEDGEEL	69	E	E	E	D	G	E	E	L	11	645.781	2	-35	1291.56	35.877	29.6	0.009	Abu-GEELIGDGMER	GEELIGDGMER		No
10000181423	100136	Q92619_40	Q92619	Q92619100136	DGADAVFP	40	D	G	A	D	A	V	F	P	18	891.444	2	-35	1782.89	47.777	47.5	4e-05	Abu-AVFPGPSLEPPAGSSGVK	AVFPGPSLEPPAGSSGVK		No
10000181424	100136	Q92619_663	Q92619	Q92619100136	VDPDGGAG	663	V	D	P	D	G	G	A	G	36	920.665	4	-49	3682.66	60.148	26.5	0.00017	Abu-GGAGASAFEQADLNGMTPELPVAVPSGPFRHEGLSK	GGAGASAFEQADLNGMTPELPVAVPSGPFRHEGLSK		No
10000181439	100136	Q9H4A3_1070	Q9H4A3	Q9H4A3100136	SSVDSAHS	1070	S	S	V	D	S	A	H	S	23	778.313	3	-35	2334.94	27.702	50	3.5e-10	Abu-SAHSDVASGMSDGNENVPSSSGR	SAHSDVASGMSDGNENVPSSSGR		No
10000181445	100136	Q12888_212	Q12888	Q12888100136	SDVDANTA	212	S	D	V	D	A	N	T	A	23	656.803	4	-33	2627.21	31.007	45.6	2.1e-06	Abu-ANTAIKHEEQSNEDIPIAEQSSK	ANTAIKHEEQSNEDIPIAEQSSK		No
10000181447	100136	O75376_556	O75376	O75376100136	DKIDGTAE	556	D	K	I	D	G	T	A	E	15	596.934	3	-28	1790.8	20.984	49.7	7e-06	Abu-GTAEETEEREQATPR	GTAEETEEREQATPR		No
10000181448	100136	O75376_386	O75376	O75376100136	EIIDGLSE	386	E	I	I	D	G	L	S	E	13	549.916	3	-25	1649.75	22.305	53	3.8e-05	Abu-GLSEQENNEKQMR	GLSEQENNEKQMR		No
10000181449	100136	O75376_1827	O75376	O75376100136	ALVDAAAS	1827	A	L	V	D	A	A	A	S	12	630.8	2	-26	1261.6	25.597	44.6	0.00013	Abu-AAASAPQMDVSK	AAASAPQMDVSK		No
10000181453	100136	Q7Z739_169	Q7Z739	Q7Z739100136	AITDGQAG	169	A	I	T	D	G	Q	A	G	27	926.427	3	-53	2779.28	63.606	48	1e-06	Abu-GQAGFGNDTLSKVPGISSIEQGMTGLK	GQAGFGNDTLSKVPGISSIEQGMTGLK		No
10000181468	100136	Q8WYQ5_397	Q8WYQ5	Q8WYQ5100136	DEPDSMGA	397	D	E	P	D	S	M	G	A	28	926.094	3	-28	2778.28	44.163	50.9	2.2e-08	Abu-SM(Oxidation)GADPGPPDEKDPLGAEAAPGALGQVK	SMGADPGPPDEKDPLGAEAAPGALGQVK		No
10000181475	100136	Q92598_548	Q92598	Q92598100136	VQTDAQQT	548	V	Q	T	D	A	Q	Q	T	29	806.861	4	-42	3227.44	36.378	32.5	0.00027	Abu-AQQTSQSPPSPELTSEENKIPDADKANEK	AQQTSQSPPSPELTSEENKIPDADKANEK		No
10000181478	100136	P11171_551	P11171	P11171100136	AAVDSADR	551	A	A	V	D	S	A	D	R	31	630.929	5	-11	3154.65	36.939	52.1	5.1e-08	Abu-SADRSPRPTSAPAITQGQVAEGGVLDASAKK	SADRSPRPTSAPAITQGQVAEGGVLDASAKK		No	TRUE
10000181483	100136	Q8N9B5_723	Q8N9B5	Q8N9B5100136	DHCDSLPS	723	D	H	C	D	S	L	P	S	19	724.361	3	-23	2173.08	55.449	55.5	4.2e-09	Abu-SLPSVLQVEEKTEEVGEGR	SLPSVLQVEEKTEEVGEGR		No
10000181488	100136	Q8N163_293	Q8N163	Q8N163100136	AAPDAGAE	293	A	A	P	D	A	G	A	E	17	882.881	2	-42	1765.76	31.466	40.4	0.00014	Abu-AGAEPITADSDPAYSSK	AGAEPITADSDPAYSSK		No
10000181493	100136	Q14160_1198	Q14160	Q14160100136	ASTDAALE	1198	A	S	T	D	A	A	L	E	21	711.364	3	-40	2134.09	59.219	43.8	7.9e-05	Abu-AALEVSPGVIANPFAAGIGHR	AALEVSPGVIANPFAAGIGHR		No
10000181497	100136	Q15154_1552	Q15154	Q15154100136	EDGDGAGA	1552	E	D	G	D	G	A	G	A	20	709.677	3	-24	2129.03	42.903	41.1	1.1e-05	Abu-GAGAGTTVNNLEETPVIENR	GAGAGTTVNNLEETPVIENR		No
10000181498	100136	Q15154_194	Q15154	Q15154100136	SEEDGRGE	194	S	E	E	D	G	R	G	E	15	563.605	3	-23	1690.81	28.862	46.3	5.4e-05	Abu-GRGEPAMESSQIVSR	GRGEPAMESSQIVSR		No
10000181500	100136	Q7Z6Z7_3665	Q7Z6Z7	Q7Z6Z7100136	LSPDGLPE	3665	L	S	P	D	G	L	P	E	11	656.813	2	-42	1313.63	24.447	43.2	0.00045	Abu-GLPEEQPQTTK	GLPEEQPQTTK		No
10000181501	100136	Q7Z6Z7_2931	Q7Z6Z7	Q7Z6Z7100136	STRDSAVA	2931	S	T	R	D	S	A	V	A	11	559.776	2	-32	1119.55	22.802	46.4	0.00072	Abu-SAVAISGADSR	SAVAISGADSR		No
10000181502	100136	Q7Z6Z7_2474	Q7Z6Z7	Q7Z6Z7100136	DYPDMNAS	2474	D	Y	P	D	M	N	A	S	8	486.759	2	-19	973.518	27.656	30.2	0.0044	Abu-MNASPLVR	MNASPLVR		No
10000181509	100136	Q13123_109	Q13123	Q13123100136	ERRDGVNK	109	E	R	R	D	G	V	N	K	19	763.351	3	-28	2290.05	47.049	43.3	0.00016	Abu-GVNKDYEETELISTTANYR	GVNKDYEETELISTTANYR		No
10000181510	100136	Q13123_325	Q13123	Q13123100136	DIGDYVPS	325	D	I	G	D	Y	V	P	S	10	412.234	3	7.8	1236.7	24.068	28.6	0.001	Abu-YVPSTTKTPR	YVPSTTKTPR		No
10000181511	100136	P55209_58	P55209	P55209100136	ERLDGLVE	58	E	R	L	D	G	L	V	E	15	858.928	2	-40	1717.86	70.257	51.1	2.2e-07	Abu-GLVETPTGYIESLPR	GLVETPTGYIESLPR		No
10000181513	100136	P55209_184	P55209	P55209100136	LLSDMVQE	184	L	L	S	D	M	V	Q	E	11	475.241	3	-12	1425.72	30.966	22.8	0.0043	Abu-MVQEHDEPILK	MVQEHDEPILK		No
10000181514	100136	P26368_129	P26368	P26368100136	MTPDGLAV	129	M	T	P	D	G	L	A	V	18	947.975	2	-53	1895.95	48.1	47.1	2.5e-05	Abu-GLAVTPTPVPVVGSQMTR	GLAVTPTPVPVVGSQMTR		No
10000181521	100136	P29083_304	P29083	P29083100136	IDMDAFQE	304	I	D	M	D	A	F	Q	E	20	601.006	4	-18	2404.03	30.342	44.9	1.9e-05	Abu-AFQEREEGHAGPDDNEEVMR	AFQEREEGHAGPDDNEEVMR		No
10000181524	100136	P15170_40	P15170	P15170100136	SLGDGRPP	40	S	L	G	D	G	R	P	P	22	533.641	5	-19	2668.21	41.171	35.3	2.2e-05	Abu-GRPPEESAHEMMEEEEEIPKPK	GRPPEESAHEMMEEEEEIPKPK		No
10000181534	100136	Q06547_304	Q06547	Q06547100136	TMPDGQQV	304	T	M	P	D	G	Q	Q	V	26	955.14	3	-35	2865.42	55.172	39.6	0.00099	Abu-GQQVLTVPATDIAEETVISEEPPAKR	GQQVLTVPATDIAEETVISEEPPAKR		No
10000181548	100136	Q14C86_1103	Q14C86	Q14C86100136	DLPDSASQ	1103	D	L	P	D	S	A	S	Q	16	603.266	3	-28	1809.8	29.705	52.3	3.9e-09	Abu-SASQAAHPQDSAFSYR	SASQAAHPQDSAFSYR		No
10000181550	100136	Q03164_2719	Q03164	Q03164100136	SQLDGVDD	2719	S	Q	L	D	G	V	D	D	17	898.878	2	-37	1797.76	27.573	50.7	1.3e-07	Abu-GVDDGTESDTSVTATTR	GVDDGTESDTSVTATTR		No
10000181558	100136	Q6P1N0_31	Q6P1N0	Q6P1N0100136	LSPDGLMI	31	L	S	P	D	G	L	M	I	31	1118.51	3	-41	3355.52	78.154	52.9	2e-07	Abu-GLM(Oxidation)IPEDGANDEELEAEFLALVGGQPPALEK	GLMIPEDGANDEELEAEFLALVGGQPPALEK		No
10000181565	100136	P13010_456	P13010	P13010100136	NAVDALID	456	N	A	V	D	A	L	I	D	10	567.292	2	-41	1134.58	45.12	36.9	0.0064	Abu-ALIDSMSLAK	ALIDSMSLAK		No
10000181567	100136	O60664_10	O60664	O60664100136	AEADGSTQ	10	A	E	A	D	G	S	T	Q	19	714.023	3	-15	2142.07	38.2	47.4	1.6e-06	Abu-GSTQVTVEEPVQQPSVVDR	GSTQVTVEEPVQQPSVVDR		No
10000181568	100136	O60664_220	O60664	O60664100136	TSLDGFDV	220	T	S	L	D	G	F	D	V	11	660.326	2	-20	1320.65	36.793	38.9	0.00059	Abu-GFDVASVQQQR	GFDVASVQQQR		No
10000181576	100136	Q8N3X1_154	Q8N3X1	Q8N3X1100136	AEIDAITA	154	A	E	I	D	A	I	T	A	26	650.849	4	-17	2603.4	38.7	43.9	1.3e-05	Abu-AITAPQPAAPVGASAPPPTPPRPEPK	AITAPQPAAPVGASAPPPTPPRPEPK		No
10000181577	100136	Q8N3X1_778	Q8N3X1	Q8N3X1100136	SSVDSTIS	778	S	S	V	D	S	T	I	S	10	535.268	2	-7.4	1070.54	11.741	35.1	0.00012	Abu-STISSSSSTK	STISSSSSTK		No
10000181578	100136	Q8N3X1_426	Q8N3X1	Q8N3X1100136	EEGDGSVS	426	E	E	G	D	G	S	V	S	9	459.743	2	17	919.487	16.782	27.2	0.0027	Abu-GSVSGSSPR	GSVSGSSPR		No
10000181591	100136	Q8IWI9_681	Q8IWI9	Q8IWI9100136	HAVDGTTE	681	H	A	V	D	G	T	T	E	20	725.97	3	-32	2177.91	30.748	35.2	7.7e-06	Abu-GTTEESSSLQASTTNDSGYR	GTTEESSSLQASTTNDSGYR		No
10000181592	100136	Q8IWI9_572	Q8IWI9	Q8IWI9100136	DSKDSVGD	572	D	S	K	D	S	V	G	D	14	502.247	3	-23	1506.74	29.488	54	8.5e-05	Abu-SVGDSLSGKEDLGR	SVGDSLSGKEDLGR		No
10000181593	100136	Q8IWI9_340	Q8IWI9	Q8IWI9100136	MDTDSALS	340	M	D	T	D	S	A	L	S	10	578.819	2	-23	1157.64	42.078	33.6	0.0085	Abu-SALSEVPQLK	SALSEVPQLK		No
10000181594	100136	P48643_154	P48643	P48643100136	KISDSVLV	154	K	I	S	D	S	V	L	V	17	652.352	3	-33	1957.06	54.122	48.5	1.1e-05	Abu-SVLVDIKDTEPLIQTAK	SVLVDIKDTEPLIQTAK		No
10000181596	100136	P48643_66	P48643	P48643100136	VDKDGDVT	66	V	D	K	D	G	D	V	T	24	872.729	3	-35	2618.19	64.328	33	0.0022	Abu-GDVTVTNDGATILSMMDVDHQIAK	GDVTVTNDGATILSMMDVDHQIAK		No
10000181598	100136	O95433_255	O95433	O95433100136	HMVDGNVS	255	H	M	V	D	G	N	V	S	14	788.869	2	-34	1577.74	49.084	34.4	0.00051	Abu-GNVSGEFTDLVPEK	GNVSGEFTDLVPEK		No
10000181600	100136	P21127_406	P21127	P21127100136	TEGDYVPD	406	T	E	G	D	Y	V	P	D	14	807.414	2	-35	1614.83	52.518	52	4.7e-07	Abu-YVPDSPALSPIELK	YVPDSPALSPIELK		No
10000181602	100136	Q9UHB9_538	Q9UHB9	Q9UHB9100136	DANDAHQT	538	D	A	N	D	A	H	Q	T	20	585.552	4	-3.1	2342.21	20.068	49.3	5.5e-08	Abu-AHQTETSSSQVKDNKPLVER	AHQTETSSSQVKDNKPLVER		No
10000181607	100136	P24534_103	P24534	P24534100136	DDIDLFGS	103	D	D	I	D	L	F	G	S	15	609.256	3	-30	1827.77	30.942	45.5	1.9e-07	Abu-LFGSDDEEESEEAKR	LFGSDDEEESEEAKR		No
10000181612	100136	P32519_146	P32519	P32519100136	VTLDGIPE	146	V	T	L	D	G	I	P	E	14	858.895	2	-38	1717.79	42.444	54.5	4.1e-08	Abu-GIPEVM(Oxidation)ETQQVQEK	GIPEVMETQQVQEK		No
10000181614	100136	P09496_77	P09496	P09496100136	DAVDGVMN	77	D	A	V	D	G	V	M	N	26	979.44	3	1.8	2938.32	41.286	51.9	2.7e-07	Abu-GVMNGEYYQESNGPTDSYAAISQVDR	GVMNGEYYQESNGPTDSYAAISQVDR		No
10000181617	100136	Q9ULX6_109	Q9ULX6	Q9ULX6100136	LETDMMQG	109	L	E	T	D	M	M	Q	G	13	707.302	2	-20	1414.6	29.33	40.1	1.8e-05	Abu-MMQGGVYGSGGER	MMQGGVYGSGGER		No
10000181620	100136	Q15942_150	Q15942	Q15942100136	LEIDSLSS	150	L	E	I	D	S	L	S	S	18	531.514	4	-22	2126.05	68.771	36.6	2e-05	Abu-SLSSLLDDMTKNDPFKAR	SLSSLLDDMTKNDPFKAR		No
10000181625	100136	Q12906_440	Q12906	Q12906100136	VEVDGNSF	440	V	E	V	D	G	N	S	F	12	431.877	3	-20	1295.63	17.3	27.6	0.0043	Abu-GNSFEASGPSKK	GNSFEASGPSKK		No
10000181629	100136	Q9Y6W5_243	Q9Y6W5	Q9Y6W5100136	ENVDASSY	243	E	N	V	D	A	S	S	Y	40	1083.5	4	2.2	4334	58.061	41.1	1.3e-06	Abu-ASSYPPPPQSDSASSPSPSFSEDNLPPPPAEFSYPVDNQR	ASSYPPPPQSDSASSPSPSFSEDNLPPPPAEFSYPVDNQR		No
10000181641	100136	Q92804_141	Q92804	Q92804100136	QQHDSYSQ	141	Q	Q	H	D	S	Y	S	Q	13	566.58	3	-22	1699.74	18.974	47.2	4.5e-06	Abu-SYSQNQQSYHSQR	SYSQNQQSYHSQR		No
10000181642	100136	P17980_28	P17980	P17980100136	AEQDGIGE	28	A	E	Q	D	G	I	G	E	17	678.342	3	-23	2035.03	56.681	48.9	3.6e-07	Abu-GIGEEVLKM(Oxidation)STEEIIQR	GIGEEVLKMSTEEIIQR		No
10000181656	100136	Q96HA7_499	Q96HA7	Q96HA7100136	DDTDGLTP	499	D	D	T	D	G	L	T	P	18	702.673	3	-20	2108.02	46.241	47.6	5.4e-08	Abu-GLTPQLEEDEELQGHLGR	GLTPQLEEDEELQGHLGR		No
10000181658	100136	Q7Z6I6_364	Q7Z6I6	Q7Z6I6100136	LENDSIEA	364	L	E	N	D	S	I	E	A	27	937.735	3	-36	2813.2	42.539	48	4.9e-07	Abu-SIEAAEGEQEPEAEALGGTNSEPGTPR	SIEAAEGEQEPEAEALGGTNSEPGTPR		No
10000181665	100136	P25098_482	P25098	P25098100136	NAADAFDI	482	N	A	A	D	A	F	D	I	13	779.824	2	-32	1559.65	50.033	32.8	1.9e-05	Abu-AFDIGSFDEEDTK	AFDIGSFDEEDTK	yes	No
10000181668	100136	P25098_528	P25098	P25098100136	TVFDTINA	528	T	V	F	D	T	I	N	A	12	491.922	3	-8.7	1475.77	32.071	31.6	0.0022	Abu-TINAETDRLEAR	TINAETDRLEAR		No
10000181675	100136	P57764_276	P57764	P57764100136	FLTDGVPA	276	F	L	T	D	G	V	P	A	16	889.918	2	-23	1779.84	56.967	40	3.7e-07	Abu-GVPAEGAFTEDFQGLR	GVPAEGAFTEDFQGLR		No
10000181676	100136	P57764_88	P57764	P57764100136	DAMDGQIQ	88	D	A	M	D	G	Q	I	Q	16	819.918	2	-31	1639.84	35.393	50.1	5.7e-06	Abu-GQIQGSVELAAPGQAK	GQIQGSVELAAPGQAK		No
10000181680	100136	P42166_442	P42166	P42166100136	EERDSGSF	442	E	E	R	D	S	G	S	F	21	763.689	3	-31	2291.07	71.754	29.6	0.00063	Abu-SGSFVAFQNIPGSELMSSFAK	SGSFVAFQNIPGSELMSSFAK		No
10000181681	100136	P42166_487	P42166	P42166100136	DKIDASEL	487	D	K	I	D	A	S	E	L	14	563.947	3	-35	1691.84	55.536	27	0.0017	Abu-ASELSFPFHESILK	ASELSFPFHESILK		No
10000181686	100136	P51572_165	P51572	P51572100136	AAVDGGKL	165	A	A	V	D	G	G	K	L	18	511.262	4	-12	2045.05	36.833	46.2	1.5e-05	Abu-GGKLDVGNAEVKLEEENR	GGKLDVGNAEVKLEEENR		No
10000181690	100136	Q96GM8_374	Q96GM8	Q96GM8100136	VCGDSIKP	374	V	C	G	D	S	I	K	P	17	672.978	3	-26	2018.93	34.473	43.5	2.4e-05	Abu-SIKPEETEQEVAADETR	SIKPEETEQEVAADETR		No
10000181695	100136	O95926_13	O95926	O95926100136	VLVDSAEE	13	V	L	V	D	S	A	E	E	18	619.981	3	-21	1859.94	46.918	48.5	1.2e-06	Abu-SAEEGSLAAAAELAAQKR	SAEEGSLAAAAELAAQKR		No
10000181700	100136	Q14980_1830	Q14980	Q14980100136	EEPDSANS	1830	E	E	P	D	S	A	N	S	10	602.76	2	-39	1205.52	26.912	39.4	1.1e-05	Abu-SANSSFYSTR	SANSSFYSTR		No
10000181701	100136	Q14980_1748	Q14980	Q14980100136	TQPDGTSV	1748	T	Q	P	D	G	T	S	V	34	927.199	4	-57	3708.8	62.913	29.4	0.0024	Abu-GTSVPGEPASPISQRLPPKVESLESLYFTPIPAR	GTSVPGEPASPISQRLPPKVESLESLYFTPIPAR		No
10000181703	100136	P55265_215	P55265	P55265100136	VRPDGHSQ	215	V	R	P	D	G	H	S	Q	18	659.949	3	-29	1979.85	25.117	39.8	2.7e-05	Abu-GHSQGAPNSDPSLEPEDR	GHSQGAPNSDPSLEPEDR		No
10000181714	100136	P33992_14	P33992	P33992100136	FYSDSFGG	14	F	Y	S	D	S	F	G	G	15	541.243	3	-26	1623.73	23.946	49.9	3.7e-07	Abu-SFGGDAQADEGQARK	SFGGDAQADEGQARK		No
10000181720	100136	Q15427_13	Q15427	Q15427100136	RNQDATVY	13	R	N	Q	D	A	T	V	Y	11	618.814	2	-21	1237.63	34.325	38.6	0.00093	Abu-ATVYVGGLDEK	ATVYVGGLDEK		No
10000181728	100136	Q9Y6E0_326	Q9Y6E0	Q9Y6E0100136	AETDGQAS	326	A	E	T	D	G	Q	A	S	17	919.892	2	-49	1839.78	58.071	51	1.9e-09	Abu-GQASGGSDSGDWIFTIR	GQASGGSDSGDWIFTIR		No
10000181733	100136	P04406_90	P04406	P04406100136	KWGDAGAE	90	K	W	G	D	A	G	A	E	18	668.646	3	-19	2005.94	58.469	33.8	5.4e-06	Abu-AGAEYVVESTGVFTTMEK	AGAEYVVESTGVFTTMEK		No
10000181739	100136	Q9H6T3_452	Q9H6T3	Q9H6T3100136	DVPDSTTA	452	D	V	P	D	S	T	T	A	26	871.412	3	-50	2614.24	60.036	46.1	3.5e-06	Abu-STTAAAPENNPINLANVIAATGTTSK	STTAAAPENNPINLANVIAATGTTSK		No
10000181743	100136	P62805_70	P62805	P62805100136	VIRDAVTY	70	V	I	R	D	A	V	T	Y	10	420.895	3	0.16	1262.68	16.58	36.2	0.00037	Abu-AVTYTEHAKR	AVTYTEHAKR		No
10000181745	100136	P62805_26	P62805	P62805100136	VLRDNIQG	26	V	L	R	D	N	I	Q	G	11	432.594	3	-9.8	1297.78	33.578	39.8	0.0016	Abu-NIQGITKPAIR	NIQGITKPAIR		No
10000181802	100136	Q9UKV3_512	Q9UKV3	Q9UKV3100136	TLADYSAQ	512	T	L	A	D	Y	S	A	Q	13	541.582	3	-21	1624.75	26.497	39.8	4.7e-05	Abu-YSAQKDLEPESDR	YSAQKDLEPESDR		No
10000181806	100136	P29692_159	P29692	P29692100136	DDIDLFGS	159	D	D	I	D	L	F	G	S	20	613.27	4	-35	2453.08	41.492	34.9	2.1e-05	Abu-LFGSDNEEEDKEAAQLREER	LFGSDNEEEDKEAAQLREER		No
10000181809	100136	Q9NZ52_334	Q9NZ52	Q9NZ52100136	AELDTTNS	334	A	E	L	D	T	T	N	S	34	1129.56	3	-48	3388.68	63.677	37.9	0.00017	Abu-TTNSLSSVLAPAPTPPSSGIPILPPPPQASGPPR	TTNSLSSVLAPAPTPPSSGIPILPPPPQASGPPR		No
10000181814	100136	Q6JBY9_273	Q6JBY9	Q6JBY9100136	EEVDGQHP	273	E	E	V	D	G	Q	H	P	23	640.533	4	-23	2562.13	28.292	57.2	3.4e-08	Abu-GQHPAQEEVPESPQTSGPEAENR	GQHPAQEEVPESPQTSGPEAENR		No
10000181817	100136	P49006_64	P49006	P49006100136	ATGDAIEP	64	A	T	G	D	A	I	E	P	14	725.852	2	-39	1451.7	26.794	40.6	0.0002	Abu-AIEPAPPSQGAEAK	AIEPAPPSQGAEAK		No
10000181818	100136	P28340_103	P28340	P28340100136	LEIDHYVG	103	L	E	I	D	H	Y	V	G	17	599.988	3	5.5	1799.96	31.011	43.9	1.6e-06	Abu-HYVGPAQPVPGGPPPSR	HYVGPAQPVPGGPPPSR		No
10000181822	100136	Q92576_1100	Q92576	Q92576100136	EEVDSMSK	1100	E	E	V	D	S	M	S	K	11	454.883	3	-7.2	1364.65	10.969	39.9	6.8e-07	Abu-SMSKDTTSQHR	SMSKDTTSQHR		No
10000181827	100136	O60508_205	O60508	O60508100136	DEKDVAKP	205	D	E	K	D	V	A	K	P	19	572.039	4	-28	2288.16	40.089	39.4	5.2e-05	Abu-VAKPSEEEQKELDEITAKR	VAKPSEEEQKELDEITAKR		No
10000181829	100136	O60508_56	O60508	O60508100136	VAVDSAPE	56	V	A	V	D	S	A	P	E	8	443.237	2	-43	886.473	22.969	22.9	0.01	Abu-SAPEVAVK	SAPEVAVK		No
10000181834	100136	P63241_97	P63241	P63241100136	GIQDGYLS	97	G	I	Q	D	G	Y	L	S	13	761.368	2	-41	1522.74	55.652	39	0.00024	Abu-GYLSLLQDSGEVR	GYLSLLQDSGEVR		No
10000181835	100136	P63241_7	P63241	P63241100136	DDLDFETG	7	D	D	L	D	F	E	T	G	28	772.853	4	-43	3091.41	54.855	31.8	0.00054	Abu-FETGDAGASATFPMQC(Carboxymethyl)SALRKNGFVVLK	FETGDAGASATFPMQCSALRKNGFVVLK	yes	No
10000181838	100136	Q14694_218	Q14694	Q14694100136	NSTDSVSD	218	N	S	T	D	S	V	S	D	20	701.323	3	-40	2103.97	57.89	39.1	9.1e-05	Abu-SVSDIVPDSPFPGALGSDTR	SVSDIVPDSPFPGALGSDTR		No
10000181839	100136	Q14694_126	Q14694	Q14694100136	LALDGSSN	126	L	A	L	D	G	S	S	N	22	753.667	3	-44	2261	50.493	31.6	0.00066	Abu-GSSNVEAEVLENDGVSGGLGQR	GSSNVEAEVLENDGVSGGLGQR		No
10000181840	100136	Q14694_139	Q14694	Q14694100136	LENDGVSG	139	L	E	N	D	G	V	S	G	9	458.246	2	-17	916.492	19.981	34.9	0.008	Abu-GVSGGLGQR	GVSGGLGQR		No
10000181844	100136	Q5T5Y3_752	Q5T5Y3	Q5T5Y3100136	AEHDFMGE	752	A	E	H	D	F	M	G	E	12	487.898	3	-36	1463.69	41.093	28.9	0.0013	Abu-FMGEAHPVVFSR	FMGEAHPVVFSR		No
10000181846	100136	Q5T5Y3_1255	Q5T5Y3	Q5T5Y3100136	VSLDGSAD	1255	V	S	L	D	G	S	A	D	31	686.13	5	-14	3430.65	56.206	27.4	0.0037	Abu-GSADLVSEGDQKPGVGFFFKDEQKAEDELAK	GSADLVSEGDQKPGVGFFFKDEQKAEDELAK		No
10000181847	100136	Q7L014_872	Q7L014	Q7L014100136	ESQDVMQQ	872	E	S	Q	D	V	M	Q	Q	23	809.102	3	-28	2427.31	58.218	36.2	0.00025	Abu-VMQQATNAILRGGTILAPTVSAK	VMQQATNAILRGGTILAPTVSAK		No
10000181850	100136	P06454_4	P06454	P06454100136	-MSDAAVD	4	-	M	S	D	A	A	V	D	12	654.31	2	-44	1308.62	25.212	40.2	0.00019	Abu-AAVDTSSEITTK	AAVDTSSEITTK		No
10000181852	100136	P06454_8	P06454	P06454100136	AAVDTSSE	8	A	A	V	D	T	S	S	E	8	476.243	2	-22	952.486	16.013	26.8	0.0071	Abu-TSSEITTK	TSSEITTK		No
10000181857	100136	P09211_92	P09211	P09211100136	ALVDMVND	92	A	L	V	D	M	V	N	D	10	616.775	2	-42	1233.55	35.703	41	0.00051	Abu-MVNDGVEDLR	MVNDGVEDLR		No
10000181860	100136	Q8N1G4_526	Q8N1G4	Q8N1G4100136	TEADAVSG	526	T	E	A	D	A	V	S	G	29	1006.5	3	-33	3019.5	52.931	49.5	3.1e-06	Abu-AVSGQLPDPTTNPSAGKDGPSLLVVEQVR	AVSGQLPDPTTNPSAGKDGPSLLVVEQVR		No
10000181862	100136	Q3B7T1_116	Q3B7T1	Q3B7T1100136	DFIDSVGN	116	D	F	I	D	S	V	G	N	17	630.632	3	-34	1891.9	36.13	45.9	4e-06	Abu-SVGNDVDVVSDSENIKK	SVGNDVDVVSDSENIKK		No
10000181865	100136	Q86UE4_184	Q86UE4	Q86UE4100136	SRHDGKEV	184	S	R	H	D	G	K	E	V	12	478.559	3	-19	1435.68	27.224	29.8	0.0086	Abu-GKEVDEGAWETK	GKEVDEGAWETK		No
10000181876	100136	Q9HCE5_30	Q9HCE5	Q9HCE5100136	ESADSIGA	30	E	S	A	D	S	I	G	A	19	551.038	4	-10	2204.15	41.679	50.3	1.1e-06	Abu-SIGAVLNSKDEQREIAETR	SIGAVLNSKDEQREIAETR		No
10000181878	100136	Q9NPG3_137	Q9NPG3	Q9NPG3100136	DESDSFID	137	D	E	S	D	S	F	I	D	20	1143.01	2	-43	2286.03	62.203	44.7	1.5e-07	Abu-SFIDNSEAYDELVPASLTTK	SFIDNSEAYDELVPASLTTK		No
10000181896	100136	Q96RU3_520	Q96RU3	Q96RU3100136	ESPDGSYT	520	E	S	P	D	G	S	Y	T	14	859.333	2	-37	1718.67	25.795	51.6	7.9e-07	Abu-GSYTEEQSQESEMK	GSYTEEQSQESEMK		No
10000181905	100136	O75934_15	O75934	O75934100136	VVVDALPY	15	V	V	V	D	A	L	P	Y	15	884.392	2	-53	1768.78	52.275	54	7.1e-06	Abu-ALPYFDQGYEAPGVR	ALPYFDQGYEAPGVR		No
10000181912	100136	Q27J81_1147	Q27J81	Q27J81100136	AEADSTSE	1147	A	E	A	D	S	T	S	E	13	491.559	3	-23	1474.68	29.623	32.8	1.8e-05	Abu-STSEGLEDAVHSR	STSEGLEDAVHSR		No
10000181913	100136	Q27J81_1052	Q27J81	Q27J81100136	DLVDAVTP	1052	D	L	V	D	A	V	T	P	24	678.855	4	-16	2715.42	48.963	32.1	8e-05	Abu-AVTPGPQPTLEQLEEGGPRPLERR	AVTPGPQPTLEQLEEGGPRPLERR		No
10000181918	100136	Q14257_204	Q14257	Q14257100136	KNGDGFVS	204	K	N	G	D	G	F	V	S	13	808.865	2	-45	1617.73	73.477	33.5	3.9e-05	Abu-GFVSLEEFLGDYR	GFVSLEEFLGDYR		No
10000181925	100136	O15400_205	O15400	O15400100136	DVIDSIEA	205	D	V	I	D	S	I	E	A	22	850.413	3	-18	2551.24	54.036	44.5	7.7e-07	Abu-SIEANVENAEVHVQQANQQLSR	SIEANVENAEVHVQQANQQLSR		No
10000181930	100136	Q9H0H5_274	Q9H0H5	Q9H0H5100136	TETDSVGT	274	T	E	T	D	S	V	G	T	12	638.285	2	-37	1276.57	21.831	46.5	0.00057	Abu-SVGTPQSNGGMR	SVGTPQSNGGMR		No
10000181931	100136	O43379_1302	O43379	O43379100136	SACDGLLQ	1302	S	A	C	D	G	L	L	Q	32	1114.21	3	-52	3342.62	66.348	48.1	8.8e-07	Abu-GLLQPPVDTQPGVTVPAVSFPAPSPVEESALR	GLLQPPVDTQPGVTVPAVSFPAPSPVEESALR		No
10000181940	100136	Q9C0C9_438	Q9C0C9	Q9C0C9100136	ETPDGSAS	438	E	T	P	D	G	S	A	S	29	1059.81	3	-26	3179.43	56.868	38	0.0001	Abu-GSASPVEMQDEGAEEPHEAGEQLPPFLLK	GSASPVEMQDEGAEEPHEAGEQLPPFLLK		No
10000181947	100136	O75880_189	O75880	O75880100136	DEIDSITT	189	D	E	I	D	S	I	T	T	22	853.101	3	-34	2559.3	74.496	35.1	0.0012	Abu-SITTLPDLTPLFISIDPERDTK	SITTLPDLTPLFISIDPERDTK		No
10000181950	100136	Q93052_404	Q93052	Q93052100136	MLYDMENP	404	M	L	Y	D	M	E	N	P	12	755.814	2	-28	1511.63	40.918	36.2	0.00016	Abu-MENPPADEYFGR	MENPPADEYFGR		No
10000181959	100136	Q9UPT8_68	Q9UPT8	Q9UPT8100136	LEDDGAEE	68	L	E	D	D	G	A	E	E	14	759.812	2	-33	1519.62	17.964	51	4.7e-06	Abu-GAEETQDTSGGPER	GAEETQDTSGGPER		No
10000181960	100136	Q9UPT8_742	Q9UPT8	Q9UPT8100136	LEPDSFSE	742	L	E	P	D	S	F	S	E	26	674.1	4	-0.47	2696.4	46.25	35.5	0.001	Abu-SFSEGGPPGRPKPGAGVPDFLPSAQR	SFSEGGPPGRPKPGAGVPDFLPSAQR		No
10000181961	100136	Q9Y4K1_68	Q9Y4K1	Q9Y4K1100136	AALDGGVA	68	A	A	L	D	G	G	V	A	18	571.613	3	-33	1714.84	20.323	57.2	1.5e-06	Abu-GGVASAASPESKPSPGTK	GGVASAASPESKPSPGTK		No
10000181965	100136	P07602_194	P07602	P07602100136	QPKDNGDV	194	Q	P	K	D	N	G	D	V	20	770.663	3	-34	2311.99	50.561	42.3	6.8e-05	Abu-NGDVCQDCIQM(Oxidation)VTDIQTAVR	NGDVCQDCIQMVTDIQTAVR		No
10000181970	100136	Q8IVD9_120	Q8IVD9	Q8IVD9100136	IEIDSTTE	120	I	E	I	D	S	T	T	E	13	519.909	3	-17	1559.73	23.031	40	4.3e-05	Abu-STTELDGHQEVEK	STTELDGHQEVEK		No
10000181971	100136	Q8IVD9_126	Q8IVD9	Q8IVD9100136	TELDGHQE	126	T	E	L	D	G	H	Q	E	15	429.234	4	-9.0	1716.93	23.285	29.4	0.00012	Abu-GHQEVEKVQPPGPVK	GHQEVEKVQPPGPVK		No
10000181976	100136	O14745_5	O14745	O14745100136	MSADAAAG	5	M	S	A	D	A	A	A	G	9	454.764	2	-13	909.527	23.203	36.4	0.0023	Abu-AAAGAPLPR	AAAGAPLPR		No
10000181977	100136	Q9BTC0_1353	Q9BTC0	Q9BTC0100136	TAEDGVPA	1353	T	A	E	D	G	V	P	A	20	741.719	3	-34	2225.16	76.552	44.5	7.8e-07	Abu-GVPAPPLLDPIVQQFGQFSK	GVPAPPLLDPIVQQFGQFSK		No
10000181991	100136	A6NHR9_6	A6NHR9	A6NHR9100136	AAADGGGP	6	A	A	A	D	G	G	G	P	21	632.276	3	-27	1896.83	24.274	53.2	3.6e-10	Abu-GGGPGGASVGTEEDGGGVGHR	GGGPGGASVGTEEDGGGVGHR		No
10000181994	100136	P50991_457	P50991	P50991100136	AFADAMEV	457	A	F	A	D	A	M	E	V	25	904.429	3	-58	2713.29	69.704	35.5	3.9e-05	Abu-AMEVIPSTLAENAGLNPISTVTELR	AMEVIPSTLAENAGLNPISTVTELR		No
10000182000	100136	Q15056_94	Q15056	Q15056100136	DEVDSLKE	94	D	E	V	D	S	L	K	E	16	602.969	3	-38	1808.91	56.282	47	7.8e-06	Abu-SLKEALTYDGALLGDR	SLKEALTYDGALLGDR		No
10000182005	100136	P54252_218	P54252	P54252100136	EANDGSGM	218	E	A	N	D	G	S	G	M	14	839.838	2	-32	1679.68	39.249	40.4	0.00017	Abu-GSGMLDEDEEDLQR	GSGMLDEDEEDLQR		No
10000182008	100136	Q08211_97	Q08211	Q08211100136	DTPDTTAN	97	D	T	P	D	T	T	A	N	24	829.741	3	-34	2489.22	51.047	38.9	8e-05	Abu-TTANAEGDLPTTMGGPLPPHLALK	TTANAEGDLPTTMGGPLPPHLALK		No
10000182012	100136	P16220_230	P16220	P16220100136	QTTDGQQI	230	Q	T	T	D	G	Q	Q	I	26	961.804	3	-47	2885.41	56.968	49.5	1.7e-06	Abu-GQQILVPSNQVVVQAASGDVQTYQIR	GQQILVPSNQVVVQAASGDVQTYQIR		No
10000182013	100136	P16220_117	P16220	P16220100136	ESVDSVTD	117	E	S	V	D	S	V	T	D	8	503.259	2	-21	1006.52	11.098	26.3	0.017	Abu-SVTDSQKR	SVTDSQKR		No
10000182014	100136	O43432_479	O43432	O43432100136	VEADGQTE	479	V	E	A	D	G	Q	T	E	15	596.948	3	-24	1790.84	38.912	45.8	1.2e-05	Abu-GQTEEILDSQNLNSR	GQTEEILDSQNLNSR		No
10000182018	100136	Q92945_129	Q92945	Q92945100136	SQGDSISS	129	S	Q	G	D	S	I	S	S	14	524.284	3	-20	1572.85	39.569	43.8	1.1e-05	Abu-SISSQLGPIHPPPR	SISSQLGPIHPPPR		No
10000182029	100136	Q5UIP0_1810	Q5UIP0	Q5UIP0100136	TINDSLIV	1810	T	I	N	D	S	L	I	V	8	481.272	2	-21	962.543	27.935	33.1	0.013	Abu-SLIVSETK	SLIVSETK		No
10000182031	100136	Q9NQ55_246	Q9NQ55	Q9NQ55100136	AEPDGDHN	246	A	E	P	D	G	D	H	N	15	554.949	3	-14	1664.85	38.37	33.4	0.00054	Abu-GDHNITELPQAVAGR	GDHNITELPQAVAGR		No
10000182034	100136	Q9P107_843	Q9P107	Q9P107100136	DTKDGGGE	843	D	T	K	D	G	G	G	E	20	682.634	3	-42	2047.9	38.17	46	2e-05	Abu-GGGEVSSQGPEDSLLGTQSR	GGGEVSSQGPEDSLLGTQSR		No
10000182035	100136	Q9P107_425	Q9P107	Q9P107100136	SDVDSVGG	425	S	D	V	D	S	V	G	G	9	460.717	2	-17	921.435	12.068	33.8	0.0024	Abu-SVGGGSESR	SVGGGSESR		No
10000182036	100136	Q5T1M5_307	Q5T1M5	Q5T1M5100136	SSRDSAAP	307	S	S	R	D	S	A	A	P	28	939.785	3	-45	2819.36	59.594	44.4	1.9e-05	Abu-SAAPSPIPGADNLSADPVVSPPTSIPFK	SAAPSPIPGADNLSADPVVSPPTSIPFK		No
10000182042	100136	Q86V81_94	Q86V81	Q86V81100136	DLFDSGFG	94	D	L	F	D	S	G	F	G	14	633.299	2	-17	1266.6	26.028	49.4	1.1e-05	Abu-SGFGGGAGVETGGK	SGFGGGAGVETGGK		No
10000182044	100136	Q9P0K8_213	Q9P0K8	Q9P0K8100136	GSVDGGAV	213	G	S	V	D	G	G	A	V	11	479.747	2	-22	959.493	15.284	40.5	0.00019	Abu-GGAVAAGASGR	GGAVAAGASGR		No
10000182050	100136	Q63HN8_274	Q63HN8	Q63HN8100136	MAVDAVAE	274	M	A	V	D	A	V	A	E	10	527.778	2	-39	1055.56	21.937	36.4	0.001	Abu-AVAEPANAVK	AVAEPANAVK		No
10000182051	100136	Q63HN8_2283	Q63HN8	Q63HN8100136	VTMDGVRE	2283	V	T	M	D	G	V	R	E	13	525.269	3	-26	1575.81	47.401	32.2	0.0028	Abu-GVREEDLAPFSLR	GVREEDLAPFSLR		No
10000182053	100136	P17028_10	P17028	P17028100136	VEEDSILI	10	V	E	E	D	S	I	L	I	16	651.023	3	-29	1953.07	58.717	49.2	4.9e-05	Abu-SILIIPTPDEEEKILR	SILIIPTPDEEEKILR		No
10000182059	100136	Q9BYJ9_165	Q9BYJ9	Q9BYJ9100136	TVVDGQPG	165	T	V	V	D	G	Q	P	G	27	718.582	4	-37	2874.33	52.198	39.8	3.3e-05	Abu-GQPGFHSDTLSKAPGMNSLEQGMVGLK	GQPGFHSDTLSKAPGMNSLEQGMVGLK		No
10000182072	100136	Q86XP1_699	Q86XP1	Q86XP1100136	SQTDSVPG	699	S	Q	T	D	S	V	P	G	20	702.366	3	-41	2107.1	45.297	53.1	5.9e-09	Abu-SVPGPAVAASKENLPVLNTR	SVPGPAVAASKENLPVLNTR		No
10000182077	100136	Q8N302_149	Q8N302	Q8N302100136	VENDAYPG	149	V	E	N	D	A	Y	P	G	14	439.5	4	55	1758	26.368	37.2	7.4e-07	Abu-AYPGTDRTENVKYR	AYPGTDRTENVKYR		No
10000182081	100136	P49327_1166	P49327	P49327100136	PGLDGAQI	1166	P	G	L	D	G	A	Q	I	15	592.969	3	-23	1778.91	33.867	43	3.9e-05	Abu-GAQIPRDPSQQELPR	GAQIPRDPSQQELPR		No
10000182088	100136	Q9Y2W1_575	Q9Y2W1	Q9Y2W1100136	VRMDSFDE	575	V	R	M	D	S	F	D	E	17	663.66	3	-19	1990.98	50.086	48.5	1e-08	Abu-SFDEDLARPSGLLAQER	SFDEDLARPSGLLAQER		No
10000182091	100136	P57071_1270	P57071	P57071100136	TTIDASSI	1270	T	T	I	D	A	S	S	I	25	684.346	4	-23	2737.38	51.182	41.7	9.7e-05	Abu-ASSIGIVQPELTLEQEDLAEGKHGK	ASSIGIVQPELTLEQEDLAEGKHGK		No
10000182094	100136	Q8TEU7_1283	Q8TEU7	Q8TEU7100136	CSVDSMSA	1283	C	S	V	D	S	M	S	A	10	604.76	2	-37	1209.52	31.838	35.6	6.5e-05	Abu-SM(Oxidation)SAALQDER	SMSAALQDER		No
10000182096	100136	O60216_280	O60216	O60216100136	DSPDSVDP	280	D	S	P	D	S	V	D	P	35	1319.92	3	-43	3959.77	70.812	24.4	0.00038	Abu-SVDPVEPMPTM(Oxidation)TDQTTLVPNEEEAFALEPIDITVK	SVDPVEPMPTMTDQTTLVPNEEEAFALEPIDITVK		No
10000182097	100136	O60216_129	O60216	O60216100136	DDIDVAQQ	129	D	D	I	D	V	A	Q	Q	11	681.842	2	-25	1363.68	34.948	46	0.00072	Abu-VAQQFSLNQSR	VAQQFSLNQSR		No
10000182100	100136	Q6DD87_231	Q6DD87	Q6DD87100136	VAADGEIA	231	V	A	A	D	G	E	I	A	35	1035.15	3	-59	3105.44	68.501	56	1.4e-08	Abu-GEIAIPVGDGEGIIVVGAPGEGAAAAAAMAGAGAK	GEIAIPVGDGEGIIVVGAPGEGAAAAAAMAGAGAK		No
10000182102	100136	Q15459_504	Q15459	Q15459100136	VTWDGHSG	504	V	T	W	D	G	H	S	G	8	444.21	2	-2.1	888.421	9.363	26.3	0.001	Abu-GHSGSMAR	GHSGSMAR		No
10000182111	100136	P46379_1002	P46379	P46379100136	DEQDGASA	1002	D	E	Q	D	G	A	S	A	29	1087.17	3	-40	3261.52	77.486	37.4	4.5e-05	Abu-GASAETEPWAAAVPPEWVPIIQQDIQSQR	GASAETEPWAAAVPPEWVPIIQQDIQSQR		No
10000182117	100136	Q7Z6E9_1679	Q7Z6E9	Q7Z6E9100136	ESLDTAAV	1679	E	S	L	D	T	A	A	V	11	593.338	2	-22	1186.68	34.442	30.8	0.015	Abu-TAAVVQVGISR	TAAVVQVGISR		No
10000182118	100136	Q86U42_112	Q86U42	Q86U42100136	DPGDGAIE	112	D	P	G	D	G	A	I	E	14	532.951	3	-14	1598.85	40.038	55	8e-05	Abu-GAIEDPELEAIKAR	GAIEDPELEAIKAR		No
10000182141	100136	Q13111_129	Q13111	Q13111100136	EQPDSLVD	129	E	Q	P	D	S	L	V	D	16	460.484	4	-12	1841.94	24.885	35.5	0.0005	Abu-SLVDHNKLNSEASPSR	SLVDHNKLNSEASPSR		No
10000182142	100136	Q13111_633	Q13111	Q13111100136	DEDDGFFV	633	D	E	D	D	G	F	F	V	28	661.7	5	-4.3	3308.5	49.498	32.8	0.0079	Abu-GFFVPHGYLSEDEGVTEEC(Carboxymethyl)ADPENHKVR	GFFVPHGYLSEDEGVTEECADPENHKVR		No
10000182146	100136	Q7Z3T8_535	Q7Z3T8	Q7Z3T8100136	AELDAFLT	535	A	E	L	D	A	F	L	T	14	877.929	2	-46	1755.86	53.832	48.2	5.7e-05	Abu-AFLTEQYLQTTNIK	AFLTEQYLQTTNIK		No
10000182156	100136	Q969V6_122	Q969V6	Q969V6100136	DSSDALSP	122	D	S	S	D	A	L	S	P	23	820.39	3	-24	2461.17	37.488	34.1	0.00059	Abu-ALSPEQPASHESQGSVPSPLEAR	ALSPEQPASHESQGSVPSPLEAR		No
10000182159	100136	Q99615_9	Q99615	Q99615100136	AECDVVMA	9	A	E	C	D	V	V	M	A	18	706.01	3	-21	2118.03	40.069	36.7	4.6e-05	Abu-VVM(Oxidation)AATEPELLDDQEAKR	VVMAATEPELLDDQEAKR		No
10000182163	100136	O60271_6	O60271	O60271100136	ELEDGVVY	6	E	L	E	D	G	V	V	Y	18	968.909	2	-49	1937.82	37.632	48.5	7.4e-08	Abu-GVVYQEEPGGSGAVMSER	GVVYQEEPGGSGAVMSER		No
10000182164	100136	Q8N684_30	Q8N684	Q8N684100136	DQIDLYDD	30	D	Q	I	D	L	Y	D	D	16	627.621	3	-20	1882.86	46.717	37.9	0.00036	Abu-LYDDVLTATSQPSDDR	LYDDVLTATSQPSDDR		No
10000182165	100136	Q8N684_325	Q8N684	Q8N684100136	GSRDSGPP	325	G	S	R	D	S	G	P	P	19	721.34	3	-17	2164.02	53.252	26.5	0.00087	Abu-SGPPPSTVSEAEFEDIMKR	SGPPPSTVSEAEFEDIMKR		No
10000182166	100136	Q3KQV9_300	Q3KQV9	Q3KQV9100136	CQVDGVPQ	300	C	Q	V	D	G	V	P	Q	19	1094.03	2	-35	2188.06	55.234	51.1	9.5e-08	Abu-GVPQVVEYSEISPETAQLR	GVPQVVEYSEISPETAQLR		No
10000182167	100136	Q14839_1234	Q14839	Q14839100136	EATDGGGD	1234	E	A	T	D	G	G	G	D	23	516.031	5	-23	2580.16	32.018	37.7	0.00039	Abu-GGGDNKEGEDSSVIHYDDKAIER	GGGDNKEGEDSSVIHYDDKAIER		No
10000182170	100136	O43524_55	O43524	O43524100136	TAADSMIP	55	T	A	A	D	S	M	I	P	18	1040.36	2	-40	2080.72	34.696	43.7	1.1e-07	Abu-SMIPEEEDDEDDEDGGGR	SMIPEEEDDEDDEDGGGR		No
10000182172	100136	O43776_410	O43776	O43776100136	KKEDGTFY	410	K	K	E	D	G	T	F	Y	16	971.413	2	-35	1942.83	56.315	19.9	0.0014	Abu-GTFYEFGEDIPEAPER	GTFYEFGEDIPEAPER		No
10000182175	100136	Q96P50_589	Q96P50	Q96P50100136	DELDSLFS	589	D	E	L	D	S	L	F	S	16	836.366	2	-53	1672.73	61.529	39.8	1e-07	Abu-SLFSYFDAGAAGAGPR	SLFSYFDAGAAGAGPR		No
10000182181	100136	Q6IBW4_460	Q6IBW4	Q6IBW4100136	ADLDAVPM	460	A	D	L	D	A	V	P	M	14	578.96	3	-31	1736.88	51.719	33	0.0011	Abu-AVPMSLSYEELVRR	AVPMSLSYEELVRR		No
10000182184	100136	Q5W0B1_543	Q5W0B1	Q5W0B1100136	SELDSMMS	543	S	E	L	D	S	M	M	S	18	702.611	3	-19	2107.83	30.779	44.9	1.4e-07	Abu-SMMSESDNSKSPC(Carboxymethyl)NNGFK	SMMSESDNSKSPCNNGFK		No
10000182187	100136	P35580_1310	P35580	P35580100136	FAKDAASL	1310	F	A	K	D	A	A	S	L	20	792.041	3	-27	2376.12	64.348	25	0.019	Abu-AASLESQLQDTQELLQEETR	AASLESQLQDTQELLQEETR		No
10000182189	100136	Q5T8P6_432	Q5T8P6	Q5T8P6100136	YDTDGYNP	432	Y	D	T	D	G	Y	N	P	18	713.663	3	-26	2140.99	37.132	38.4	0.00056	Abu-GYNPEAPSITNTSRPMYR	GYNPEAPSITNTSRPMYR		No
10000182191	100136	P14625_29	P14625	P14625100136	VDVDGTVE	29	V	D	V	D	G	T	V	E	11	425.883	3	-16	1277.65	24.58	39.8	0.0014	Abu-GTVEEDLGKSR	GTVEEDLGKSR		No
10000182195	100136	Q8WWM7_585	Q8WWM7	Q8WWM7100136	KEVDGLLT	585	K	E	V	D	G	L	L	T	15	787.883	2	-32	1575.77	42.705	43	0.00095	Abu-GLLTSEPMGSPVSSK	GLLTSEPMGSPVSSK		No
10000182198	100136	Q5TB80_248	Q5TB80	Q5TB80100136	DSLDSVAE	248	D	S	L	D	S	V	A	E	18	531.778	4	-19	2127.11	35.574	53.9	1.7e-07	Abu-SVAEVNLDEQDKITPKPR	SVAEVNLDEQDKITPKPR		No
10000182203	100136	Q9GZM5_69	Q9GZM5	Q9GZM5100136	DAADAAAA	69	D	A	A	D	A	A	A	A	15	826.85	2	-33	1653.7	43.112	32.8	9.8e-06	Abu-AAAAEEEDGEFLGMK	AAAAEEEDGEFLGMK		No
10000182204	100136	Q9GZM5_66	Q9GZM5	Q9GZM5100136	VDADAADA	66	V	D	A	D	A	A	D	A	18	955.383	2	-47	1910.77	49.088	16.2	0.00095	Abu-AADAAAAEEEDGEFLGMK	AADAAAAEEEDGEFLGMK		No
10000182207	100136	P18848_66	P18848	P18848100136	LAVDGLVS	66	L	A	V	D	G	L	V	S	23	866.384	3	-31	2599.15	54.463	45.6	2.1e-07	Abu-GLVSPSNNSKEDAFSGTDWMLEK	GLVSPSNNSKEDAFSGTDWMLEK		No
10000182208	100136	O43829_244	O43829	O43829100136	TFNDGMSE	244	T	F	N	D	G	M	S	E	21	785.34	3	-25	2356.02	43.153	51.6	2.2e-07	Abu-GMSEVKDEQTPGWTTAASDMK	GMSEVKDEQTPGWTTAASDMK		No
10000182210	100136	Q9Y6Y0_239	Q9Y6Y0	Q9Y6Y0100136	NLLDGQAE	239	N	L	L	D	G	Q	A	E	18	702.316	3	-28	2106.95	44.224	43.8	2.3e-07	Abu-GQAEVFGSDDDHIQFVQK	GQAEVFGSDDDHIQFVQK		No
10000182211	100136	P47712_523	P47712	P47712100136	DELDAAVA	523	D	E	L	D	A	A	V	A	11	652.79	2	-30	1305.58	34.414	36.5	1.6e-05	Abu-AAVADPDEFER	AAVADPDEFER		No
10000182213	100136	Q15633_235	Q15633	Q15633100136	DARDGNEV	235	D	A	R	D	G	N	E	V	18	672.284	3	-37	2016.85	40.743	51.5	2.4e-07	Abu-GNEVEPDDDHFSIGVGSR	GNEVEPDDDHFSIGVGSR		No
10000182214	100136	Q6ZRS2_2276	Q6ZRS2	Q6ZRS2100136	NENDGFPA	2276	N	E	N	D	G	F	P	A	22	788.322	3	-30	2364.96	34.896	45.7	2.5e-07	Abu-GFPAGEGEEAGRPGAEDEEMSR	GFPAGEGEEAGRPGAEDEEMSR		No
10000182219	100136	Q96N16_18	Q96N16	Q96N16100136	METDAVQM	18	M	E	T	D	A	V	Q	M	10	631.286	2	-44	1262.57	32.5	33.3	0.00089	Abu-AVQM(Oxidation)ANEELR	AVQMANEELR		No
10000182225	100136	P51991_116	P51991	P51991100136	SREDSVKP	116	S	R	E	D	S	V	K	P	12	450.613	3	-2.1	1351.84	17.899	24.5	0.0067	Abu-SVKPGAHLTVKK	SVKPGAHLTVKK		No
10000182228	100136	P12270_2148	P12270	P12270100136	HRTDGFAE	2148	H	R	T	D	G	F	A	E	16	574.289	3	-35	1722.87	43.029	55.1	3.7e-07	Abu-GFAEAIHSPQVAGVPR	GFAEAIHSPQVAGVPR		No
10000182232	100136	O60832_419	O60832	O60832100136	EYVDYSES	419	E	Y	V	D	Y	S	E	S	25	679.607	4	-31	2718.43	48.282	45.2	3.9e-07	Abu-YSESAKKEVVAEVVKAPQVVAEAAK	YSESAKKEVVAEVVKAPQVVAEAAK		No
10000182238	100136	Q92574_639	Q92574	Q92574100136	TEEDGVPS	639	T	E	E	D	G	V	P	S	13	736.857	2	-23	1473.71	47.401	42.8	0.00077	Abu-GVPSTSPMEVLDR	GVPSTSPMEVLDR		No
10000182240	100136	P50851_1757	P50851	P50851100136	SSVDSAQA	1757	S	S	V	D	S	A	Q	A	15	761.308	2	-34	1522.62	20.732	47.9	5.7e-07	Abu-SAQASDMGGESPGSR	SAQASDMGGESPGSR		No
10000182246	100136	Q8NCD3_92	Q8NCD3	Q8NCD3100136	DRTDGSVQ	92	D	R	T	D	G	S	V	Q	16	583.298	3	-4.3	1749.89	40.834	44	6.7e-07	Abu-GSVQAAAWGPELPSHR	GSVQAAAWGPELPSHR		No
10000182247	100136	Q9H0E2_37	Q9H0E2	Q9H0E2100136	VQLDAQAA	37	V	Q	L	D	A	Q	A	A	18	620.645	3	-27	1861.94	37.537	44.5	7.1e-07	Abu-AQAAQQLQYGGAVGTVGR	AQAAQQLQYGGAVGTVGR		No
10000182250	100136	Q9NW13_245	Q9NW13	Q9NW13100136	DEEDGVFD	245	D	E	E	D	G	V	F	D	16	984.883	2	-31	1969.77	42.047	46	8.1e-07	Abu-GVFDDEDEEEENIESK	GVFDDEDEEEENIESK		No
10000182255	100136	Q8NF91_8280	Q8NF91	Q8NF91100136	ASVDSIPL	8280	A	S	V	D	S	I	P	L	14	610.947	3	-22	1832.84	53.824	47	8.4e-07	Abu-SIPLEWDHDYDLSR	SIPLEWDHDYDLSR		No
10000182256	100136	Q93009_51	Q93009	Q93009100136	ALSDGHNT	51	A	L	S	D	G	H	N	T	16	659.917	3	-26	1979.75	37.671	45.9	9.2e-07	Abu-GHNTAEEDMEDDTSWR	GHNTAEEDMEDDTSWR		No
10000182261	100136	Q9UI08_241	Q9UI08	Q9UI08100136	RPEDASGG	241	R	P	E	D	A	S	G	G	33	1043.7	3	-94	3131.1	38.429	22.4	0.016	Abu-ASGGSSPSGTSKSDANRASSGGGGGGLM(Oxidation)EEMNK	ASGGSSPSGTSKSDANRASSGGGGGGLMEEMNK		No
10000182265	100136	Q9GZR1_50	Q9GZR1	Q9GZR1100136	TDKDGTNL	50	T	D	K	D	G	T	N	L	19	703.639	3	-38	2110.92	34.58	41.1	1e-06	Abu-GTNLLSVDEDEDSETSKGK	GTNLLSVDEDEDSETSKGK		No
10000182271	100136	Q15691_117	Q15691	Q15691100136	KFFDANYD	117	K	F	F	D	A	N	Y	D	14	547.251	3	-19	1641.75	31.116	26.6	0.0027	Abu-ANYDGKDYDPVAAR	ANYDGKDYDPVAAR		No
10000182273	100136	Q9Y244_13	Q9Y244	Q9Y244100136	ELKDSIPV	13	E	L	K	D	S	I	P	V	20	747.36	3	-40	2242.08	57.302	48.5	1.2e-06	Abu-SIPVTELSASGPFESHDLLR	SIPVTELSASGPFESHDLLR		No
10000182275	100136	O95347_1117	O95347	O95347100136	DEVDAALD	1117	D	E	V	D	A	A	L	D	16	618.303	3	-40	1854.91	50.768	41.5	1.3e-06	Abu-AALDLSHTQNIGQMLR	AALDLSHTQNIGQMLR		No
10000182276	100136	Q9P1Y5_862	Q9P1Y5	Q9P1Y5100136	DEGDGSPA	862	D	E	G	D	G	S	P	A	21	730.307	3	-19	2190.92	41.299	41.4	1.4e-06	Abu-GSPAGAEDSLEEEASSEGEPR	GSPAGAEDSLEEEASSEGEPR		No
10000182280	100136	P23025_6	P23025	P23025100136	AAADGALP	6	A	A	A	D	G	A	L	P	20	692.363	3	-19	2077.09	54.239	46	1.4e-06	Abu-GALPEAAALEQPAELPASVR	GALPEAAALEQPAELPASVR		No
10000182285	100136	Q9BRT9_7	Q9BRT9	Q9BRT9100136	EEVDFLGQ	7	E	E	V	D	F	L	G	Q	23	849.403	3	-27	2548.21	65.628	47.6	1.4e-06	Abu-FLGQDSDGGSEEVVLTPAELIER	FLGQDSDGGSEEVVLTPAELIER		No
10000182286	100136	O00562_379	O00562	O00562100136	DFIDAFAS	379	D	F	I	D	A	F	A	S	20	1007.44	2	-50	2014.88	38.733	52.1	1.5e-06	Abu-AFASPVEAEGTPEPGAEAAK	AFASPVEAEGTPEPGAEAAK		No
10000182288	100136	O14974_886	O14974	O14974100136	TQTDSISR	886	T	Q	T	D	S	I	S	R	22	627.299	4	-17	2509.2	43.09	38.9	9.8e-07	Abu-SISRYETSSTSAGDRYDSLLGR	SISRYETSSTSAGDRYDSLLGR		No
10000182289	100136	Q9UMY4_22	Q9UMY4	Q9UMY4100136	DLTDAYGP	22	D	L	T	D	A	Y	G	P	23	859.405	3	-44	2578.22	73.882	53.8	1.6e-06	Abu-AYGPPSNFLEIDIFNPQTVGVGR	AYGPPSNFLEIDIFNPQTVGVGR		No
10000182293	100136	Q9BYW2_648	Q9BYW2	Q9BYW2100136	DSHDSIKE	648	D	S	H	D	S	I	K	E	10	402.23	3	-1.3	1206.69	36.889	30.6	0.014	Abu-SIKELDSLSK	SIKELDSLSK		No
10000182300	100136	P09884_84	P09884	P09884100136	VDDDGIGY	84	V	D	D	D	G	I	G	Y	31	697.7	5	-33	3488.5	57.584	30.1	7.1e-05	Abu-GIGYVEDGREIFDDDLEDDALDADEKGKDGK	GIGYVEDGREIFDDDLEDDALDADEKGKDGK		No
10000182302	100136	Q9H3R0_397	Q9H3R0	Q9H3R0100136	DEVDGAEV	397	D	E	V	D	G	A	E	V	19	695.667	3	-23	2087	44.195	43.9	2.1e-06	Abu-GAEVPNPDSVTDDLKVSEK	GAEVPNPDSVTDDLKVSEK		No
10000182303	100136	P0DJD0_1500	P0DJD0	P0DJD0100136	DVADAASE	1500	D	V	A	D	A	A	S	E	16	856.386	2	-34	1712.77	25.302	50.9	2.4e-06	Abu-AASEVEVSSTSETTTK	AASEVEVSSTSETTTK	yes	No
10000182305	100136	O15015_1006	O15015	O15015100136	MVVDSVLE	1006	M	V	V	D	S	V	L	E	18	930.9	2	-68	1861.8	68.576	44.6	2.4e-06	Abu-SVLEDIVNSVSGEGGDAK	SVLEDIVNSVSGEGGDAK		No
10000182306	100136	P17544_44	P17544	P17544100136	ARTDSVII	44	A	R	T	D	S	V	I	I	13	742.387	2	-30	1484.77	35.15	42.6	0.0038	Abu-SVIIADQTPTPTR	SVIIADQTPTPTR		No
10000182308	100136	P53621_857	P53621	P53621100136	LDEDGFVE	857	L	D	E	D	G	F	V	E	16	832.39	2	-27	1664.78	51.941	49.2	2.5e-06	Abu-GFVEATEGLGDDALGK	GFVEATEGLGDDALGK		No
10000182313	100136	Q01130_71	Q01130	Q01130100136	DAEDAMDA	71	D	A	E	D	A	M	D	A	13	703.805	2	-27	1407.61	44.428	38.3	0.0011	Abu-AMDAMDGAVLDGR	AMDAMDGAVLDGR		No
10000182314	100136	Q01130_74	Q01130	Q01130100136	DAMDAMDG	74	D	A	M	D	A	M	D	G	10	545.266	2	-9.9	1090.53	33.251	34.6	0.013	Abu-AMDGAVLDGR	AMDGAVLDGR		No
10000182316	100136	P11177_38	P11177	P11177100136	TVRDAINQ	38	T	V	R	D	A	I	N	Q	15	621.28	3	-19	1863.84	37.062	33.6	0.00088	Abu-AINQGMDEELERDEK	AINQGMDEELERDEK		No
10000182322	100136	Q9UPN7_297	Q9UPN7	Q9UPN7100136	SSVDGQLE	297	S	S	V	D	G	Q	L	E	27	715.373	4	-40	2861.49	77.304	40.4	2.9e-06	Abu-GQLELLAQGALESTVSSVGALHALRPR	GQLELLAQGALESTVSSVGALHALRPR		No
10000182323	100136	Q86Y82_218	Q86Y82	Q86Y82100136	DLIDSIEA	218	D	L	I	D	S	I	E	A	15	590.611	3	-26	1771.83	37.837	49.9	2.9e-06	Abu-SIEANVESSEVHVER	SIEANVESSEVHVER		No
10000182326	100136	Q9UHR5_45	Q9UHR5	Q9UHR5100136	LVSDAYGE	45	L	V	S	D	A	Y	G	E	9	572.736	2	-22	1145.47	30.6	33.1	0.00023	Abu-AYGEDDFSR	AYGEDDFSR		No
10000182329	100136	Q9UPN4_549	Q9UPN4	Q9UPN4100136	DQLDSQQE	549	D	Q	L	D	S	Q	Q	E	27	971.439	3	-37	2914.32	66.557	38.4	1.7e-06	Abu-SQQEGWVPEAGPGPLELGSEVSTSVMR	SQQEGWVPEAGPGPLELGSEVSTSVMR		No
10000182333	100136	Q15637_449	Q15637	Q15637100136	PPMDQYLG	449	P	P	M	D	Q	Y	L	G	14	784.881	2	-33	1569.76	40.46	47.5	3.6e-06	Abu-QYLGSTPVGSGVYR	QYLGSTPVGSGVYR		No
10000182334	100136	Q5SW79_1325	Q5SW79	Q5SW79100136	GEIDSVTS	1325	G	E	I	D	S	V	T	S	27	870.409	3	-29	2611.23	36.972	50.5	3.6e-06	Abu-SVTSSGTAPSTTVSTAATTPGSAIDTR	SVTSSGTAPSTTVSTAATTPGSAIDTR		No
10000182336	100136	O76024_212	O76024	O76024100136	NEHDGGAQ	212	N	E	H	D	G	G	A	Q	10	496.769	2	-21	993.539	18.273	29.6	0.0011	Abu-GGAQPGPVPK	GGAQPGPVPK		No
10000182337	100136	O76024_76	O76024	O76024100136	ERADGTGP	76	E	R	A	D	G	T	G	P	19	730.683	3	-19	2192.05	59.038	35.3	0.0013	Abu-GTGPTKGDMEIPFEEVLER	GTGPTKGDMEIPFEEVLER		No
10000182338	100136	Q9H3P7_344	Q9H3P7	Q9H3P7100136	THTDSSEK	344	T	H	T	D	S	S	E	K	20	748.012	3	-22	2244.04	46.054	42	3.8e-06	Abu-SSEKELEPEAAEEALENGPK	SSEKELEPEAAEEALENGPK		No
10000182341	100136	O75475_31	O75475	O75475100136	EVPDGAVK	31	E	V	P	D	G	A	V	K	26	580.708	5	-25	2903.54	62.29	43.8	4.1e-06	Abu-GAVKPPTNKLPIFFFGTHETAFLGPK	GAVKPPTNKLPIFFFGTHETAFLGPK		No
10000182342	100136	Q9P2N5_488	Q9P2N5	Q9P2N5100136	YEPDGYNP	488	Y	E	P	D	G	Y	N	P	14	760.83	2	-54	1521.66	31.635	49.5	4.2e-06	Abu-GYNPEAPSITSSGR	GYNPEAPSITSSGR		No
10000182346	100136	Q14BN4_465	Q14BN4	Q14BN4100136	DTTDAQMD	465	D	T	T	D	A	Q	M	D	14	843.867	2	-44	1687.73	37.383	46.8	4.4e-06	Abu-AQMDEQDLNEPLAK	AQMDEQDLNEPLAK		No
10000182347	100136	Q96FS4_815	Q96FS4	Q96FS4100136	CLQDGGSP	815	C	L	Q	D	G	G	S	P	14	712.318	2	-37	1424.64	32.386	51.2	4.8e-06	Abu-GGSPPGPGDLAEER	GGSPPGPGDLAEER		No
10000182350	100136	Q09666_1425	Q09666	Q09666100136	EVPDVNIE	1425	E	V	P	D	V	N	I	E	9	514.264	2	-21	1028.53	24.259	33.9	0.0079	Abu-VNIEGPDAK	VNIEGPDAK		No
10000182351	100136	P12755_528	P12755	P12755100136	AVPDAAAP	528	A	V	P	D	A	A	A	P	19	668.335	3	-14	2005.01	56.224	41.8	5.1e-06	Abu-AAAPADAPSGLEAELEHLR	AAAPADAPSGLEAELEHLR		No
10000182359	100136	P16333_89	P16333	P16333100136	SVPDSASP	89	S	V	P	D	S	A	S	P	15	817.846	2	-27	1635.69	35.519	45.9	5.7e-06	Abu-SASPADDSFVDPGER	SASPADDSFVDPGER		No
10000182364	100136	Q8NDI1_275	Q8NDI1	Q8NDI1100136	DDPDAAEL	275	D	D	P	D	A	A	E	L	23	843.375	3	-27	2530.12	52.993	45.2	6e-06	Abu-AAELNPFGDPDSEEPITETASPR	AAELNPFGDPDSEEPITETASPR		No
10000182368	100136	Q6NXE6_83	Q6NXE6	Q6NXE6100136	VSADGSQE	83	V	S	A	D	G	S	Q	E	34	965.195	4	-36	3860.78	77.994	42.8	6.3e-06	Abu-GSQEPTHDILQMLSDLQESVASSRPQEVSAYLTR	GSQEPTHDILQMLSDLQESVASSRPQEVSAYLTR		No
10000182370	100136	P23381_84	P23381	P23381100136	AEEDFVDP	84	A	E	E	D	F	V	D	P	13	775.869	2	-35	1551.74	48.783	48.5	6.3e-06	Abu-FVDPWTVQTSSAK	FVDPWTVQTSSAK		No
10000182373	100136	Q9C0B9_235	Q9C0B9	Q9C0B9100136	AEKDGSGP	235	A	E	K	D	G	S	G	P	12	620.306	2	-23	1240.61	27.823	46.2	6.7e-06	Abu-GSGPEGGIVEPR	GSGPEGGIVEPR		No
10000182374	100136	Q8WUF5_295	Q8WUF5	Q8WUF5100136	SSLDGLGG	295	S	S	L	D	G	L	G	G	17	581.64	3	-20	1744.92	37.399	44.7	6.8e-06	Abu-GLGGTGKDNLTSATLPR	GLGGTGKDNLTSATLPR		No
10000182378	100136	O94973_691	O94973	O94973100136	VFSDSASV	691	V	F	S	D	S	A	S	V	18	936.944	2	-35	1873.89	45.463	49.8	6.9e-06	Abu-SASVVAPLAPGSEDNFAR	SASVVAPLAPGSEDNFAR		No
10000182379	100136	P62195_253	P62195	P62195100136	DEIDSIGS	253	D	E	I	D	S	I	G	S	19	654.966	3	-33	1964.9	28.346	52.8	7e-06	Abu-SIGSSRLEGGSGGDSEVQR	SIGSSRLEGGSGGDSEVQR		No
10000182387	100136	Q69YI7_103	Q69YI7	Q69YI7100136	TEEDGAGG	103	T	E	E	D	G	A	G	G	29	863.745	3	-38	2591.24	50.694	50.7	8.2e-06	Abu-GAGGPGTGGGSGGGGPAVAPVLLTPMQQR	GAGGPGTGGGSGGGGPAVAPVLLTPMQQR		No
10000182388	100136	Q13541_26	Q13541	Q13541100136	VLGDGVQL	26	V	L	G	D	G	V	Q	L	26	883.736	3	-46	2651.21	54.368	40.5	8.3e-06	Abu-GVQLPPGDYSTTPGGTLFSTTPGGTR	GVQLPPGDYSTTPGGTLFSTTPGGTR		No
10000182399	100136	Q8NCG7_549	Q8NCG7	Q8NCG7100136	TELDGGDQ	549	T	E	L	D	G	G	D	Q	20	747.044	3	-33	2241.13	60.066	52.5	1e-05	Abu-GGDQEVLTQPLLGEQSLLTR	GGDQEVLTQPLLGEQSLLTR		No
10000182400	100136	O75367_173	O75367	O75367100136	ASADSTTE	173	A	S	A	D	S	T	T	E	17	898.923	2	-29	1797.85	44.908	44.3	1e-05	Abu-STTEGTPADGFTVLSTK	STTEGTPADGFTVLSTK		No
10000182403	100136	Q14203_303	Q14203	Q14203100136	DTADAIEM	303	D	T	A	D	A	I	E	M	15	607.951	3	-19	1823.85	49.063	45.5	1.1e-05	Abu-AIEMATLDKEMAEER	AIEMATLDKEMAEER		No
10000182404	100136	Q13546_559	Q13546	Q13546100136	SLLDSTNT	559	S	L	L	D	S	T	N	T	13	507.918	3	-9.6	1523.75	21.317	41.8	1.1e-05	Abu-STNTNFKEEPAAK	STNTNFKEEPAAK		No
10000182405	100136	O75152_531	O75152	O75152100136	NEVDSQSS	531	N	E	V	D	S	Q	S	S	23	620.796	4	-34	2483.19	35.346	39.5	8.7e-06	Abu-SQSSIRTEAKEASGETTGVDITK	SQSSIRTEAKEASGETTGVDITK		No
10000182406	100136	Q9BQG0_750	Q9BQG0	Q9BQG0100136	EERDGDVD	750	E	E	R	D	G	D	V	D	19	726.334	3	-52	2179	64.449	44.5	1.1e-05	Abu-GDVDQGFREQLMTVLQAGK	GDVDQGFREQLMTVLQAGK		No
10000182407	100136	Q15814_154	Q15814	Q15814100136	TKVDAAPG	154	T	K	V	D	A	A	P	G	19	658.017	3	-20	1974.05	54.433	39.1	7.7e-06	Abu-AAPGIPPAVESIQDSPLPK	AAPGIPPAVESIQDSPLPK		No
10000182417	100136	Q96G28_142	Q96G28	Q96G28100136	CLTDGSDV	142	C	L	T	D	G	S	D	V	14	553.913	3	-18	1661.74	46.556	29.1	0.00085	Abu-GSDVVSDLEHEEMK	GSDVVSDLEHEEMK		No
10000182419	100136	Q96G28_145	Q96G28	Q96G28100136	DGSDVVSD	145	D	G	S	D	V	V	S	D	11	467.553	3	-20	1402.66	33.362	24.4	0.0033	Abu-VVSDLEHEEMK	VVSDLEHEEMK		No
10000182422	100136	Q15544_35	Q15544	Q15544100136	TDTDGIPE	35	T	D	T	D	G	I	P	E	15	829.863	2	-34	1659.73	39.244	35.9	2.7e-06	Abu-GIPEETDGDADVDLK	GIPEETDGDADVDLK		No
10000182424	100136	Q9GZR7_297	Q9GZR7	Q9GZR7100136	AESDALPD	297	A	E	S	D	A	L	P	D	22	790.047	3	-25	2370.14	60.428	51.2	1.7e-05	Abu-ALPDDTVIESEALPSDIAAEAR	ALPDDTVIESEALPSDIAAEAR		No
10000182426	100136	A6NIH7_52	A6NIH7	A6NIH7100136	AADDGVGA	52	A	A	D	D	G	V	G	A	24	668.852	4	-33	2675.41	62.864	40	1.7e-05	Abu-GVGAAVTEQELLALDTIRPEHVLR	GVGAAVTEQELLALDTIRPEHVLR		No
10000182430	100136	Q96ED9_161	Q96ED9	Q96ED9100136	DTPDSLSP	161	D	T	P	D	S	L	S	P	15	886.882	2	-29	1773.76	41.136	48.5	1.9e-05	Abu-SLSPETYGNFDSQSR	SLSPETYGNFDSQSR		No
10000182434	100136	Q9BWU0_538	Q9BWU0	Q9BWU0100136	DSLDAFMS	538	D	S	L	D	A	F	M	S	7	472.709	2	-12	945.418	35.215	24.9	0.0027	Abu-AFMSEM(Oxidation)K	AFMSEMK		No
10000182437	100136	Q9Y5V3_223	Q9Y5V3	Q9Y5V3100136	SEPDGATA	223	S	E	P	D	G	A	T	A	19	659.625	3	-33	1978.88	26.379	44.9	1.9e-05	Abu-GATAQTSADGSQAQNLESR	GATAQTSADGSQAQNLESR		No
10000182454	100136	O75925_101	O75925	O75925100136	LTYDGHPA	101	L	T	Y	D	G	H	P	A	17	585.662	3	-25	1756.99	55.106	45.4	3.1e-05	Abu-GHPASSPLLPVSLLGPK	GHPASSPLLPVSLLGPK		No
10000182457	100136	P14316_238	P14316	P14316100136	ETTDSVPS	238	E	T	T	D	S	V	P	S	16	481.722	4	-15	1926.89	30.822	37.4	1.1e-05	Abu-SVPSDEESAEGRPHWR	SVPSDEESAEGRPHWR		No
10000182466	100136	Q8WYP5_1359	Q8WYP5	Q8WYP5100136	TEKDGDKD	1359	T	E	K	D	G	D	K	D	17	640.972	3	-28	1922.91	41.012	46.5	3.9e-05	Abu-GDKDVFASEVTPSDLQK	GDKDVFASEVTPSDLQK		No
10000182468	100136	Q96N64_56	Q96N64	Q96N64100136	GETDGQQS	56	G	E	T	D	G	Q	Q	S	25	876.766	3	-22	2630.3	46.334	47.6	4.4e-05	Abu-GQQSAPQADEPPLPPPPPPPGELAR	GQQSAPQADEPPLPPPPPPPGELAR		No
10000182469	100136	P25490_120	P25490	P25490100136	DDSDGLRA	120	D	D	S	D	G	L	R	A	39	1024.98	4	-46	4099.9	77.89	34.7	4.9e-06	Abu-GLRAEDGFEDQILIPVPAPAGGDDDYIEQTLVTVAAAGK	GLRAEDGFEDQILIPVPAPAGGDDDYIEQTLVTVAAAGK		No
10000182473	100136	Q9H1B7_133	Q9H1B7	Q9H1B7100136	NHVDGSSK	133	N	H	V	D	G	S	S	K	16	542.303	3	-5.4	1626.91	34.519	41.1	5e-05	Abu-GSSKPAVLAAPSGLER	GSSKPAVLAAPSGLER		No
10000182476	100136	P46940_9	P46940	P46940100136	DEVDGLGV	9	D	E	V	D	G	L	G	V	17	481.995	4	-22	1927.98	36.413	33.8	0.0017	Abu-GLGVARPHYGSVLDNER	GLGVARPHYGSVLDNER		No
10000182483	100136	P53805_4	P53805	P53805100136	-MEDGVAG	4	-	M	E	D	G	V	A	G	20	632.311	3	-22	1896.93	51.075	41.5	5.9e-05	Abu-GVAGPQLGAAAEAAEAAEAR	GVAGPQLGAAAEAAEAAEAR		No
10000182484	100136	O14523_443	O14523	O14523100136	IMPDGTIV	443	I	M	P	D	G	T	I	V	15	567.639	3	-36	1702.92	35.241	46.3	5.9e-05	Abu-GTIVTTVTTVQSRPR	GTIVTTVTTVQSRPR		No
10000182485	100136	Q8N1F7_158	Q8N1F7	Q8N1F7100136	DALDFTQE	158	D	A	L	D	F	T	Q	E	18	684.317	3	-18	2052.95	44.838	36.5	1.3e-05	Abu-FTQESEPSYISDVGPPGR	FTQESEPSYISDVGPPGR		No
10000182486	100136	Q9H9B1_361	Q9H9B1	Q9H9B1100136	EEDDGHGA	361	E	E	D	D	G	H	G	A	16	576.917	3	-33	1730.75	28.25	40.8	6.5e-05	Abu-GHGAEQAAAFPTEDSR	GHGAEQAAAFPTEDSR		No
10000182487	100136	Q16543_9	Q16543	Q16543100136	SVWDHIEV	9	S	V	W	D	H	I	E	V	22	657.1	4	65	2628.4	47.931	34.5	6.2e-06	Abu-HIEVSDDEDETHPNIDTASLFR	HIEVSDDEDETHPNIDTASLFR		No
10000182489	100136	P49023_6	P49023	P49023100136	DDLDALLA	6	D	D	L	D	A	L	L	A	15	557.619	3	-32	1672.86	54.013	37	2e-05	Abu-ALLADLESTTSHISK	ALLADLESTTSHISK		No
10000182497	100136	Q99549_20	Q99549	Q99549100136	SAADSTEE	20	S	A	A	D	S	T	E	E	24	844.373	3	-28	2533.12	55.717	35.4	1.2e-05	Abu-STEELAEVEEGVGVVGEDNDAAAR	STEELAEVEEGVGVVGEDNDAAAR		No
10000182507	100136	P55210_199	P55210	P55210100136	IQADSGPI	199	I	Q	A	D	S	G	P	I	12	671.302	2	-31	1342.6	23.553	54.1	9.7e-05	Abu-SGPINDTDANPR	SGPINDTDANPR		No
10000182508	100136	Q92785_116	Q92785	Q92785100136	ISQDGSSL	116	I	S	Q	D	G	S	S	L	9	515.775	2	-44	1031.55	48.678	30	0.0028	Abu-GSSLEALLR	GSSLEALLR		No
10000182509	100136	Q92785_244	Q92785	Q92785100136	DKEDSQPP	244	D	K	E	D	S	Q	P	P	10	591.293	2	-42	1182.59	20.961	33.4	0.0028	Abu-SQPPTPVSQR	SQPPTPVSQR		No
10000182511	100136	Q8WXH0_4216	Q8WXH0	Q8WXH0100136	DTLDSSDA	4216	D	T	L	D	S	S	D	A	11	601.278	2	-27	1202.56	20.226	41.6	0.0001	Abu-SSDAQGGLEPR	SSDAQGGLEPR		No
10000182513	100136	Q8IZ40_392	Q8IZ40	Q8IZ40100136	AEQDGAPG	392	A	E	Q	D	G	A	P	G	14	508.253	3	-23	1524.76	28.091	39.4	8.8e-05	Abu-GAPGAPVPMEEARR	GAPGAPVPMEEARR		No
10000182517	100136	Q8TEQ6_1320	Q8TEQ6	Q8TEQ6100136	QQLDTAST	1320	Q	Q	L	D	T	A	S	T	25	962.08	3	-41	2886.24	36.597	38.8	7.2e-05	Abu-TASTEETDPETSQPEPNRPSELDLR	TASTEETDPETSQPEPNRPSELDLR		No
10000182518	100136	P78344_793	P78344	P78344100136	DETDSSSA	793	D	E	T	D	S	S	S	A	14	544.929	3	-22	1634.79	21.091	49	0.00013	Abu-SSSAPSKEQLEQEK	SSSAPSKEQLEQEK		No
10000182519	100136	Q5T4S7_2904	Q5T4S7	Q5T4S7100136	SAVDSVAG	2904	S	A	V	D	S	V	A	G	11	390.863	3	-11	1172.59	17.313	37.4	4.3e-05	Abu-SVAGEHSVSGR	SVAGEHSVSGR		No
10000182520	100136	Q13432_45	Q13432	Q13432100136	SEPDAGPG	45	S	E	P	D	A	G	P	G	12	429.909	3	-13	1289.73	22.765	39.8	0.00012	Abu-AGPGPRPGPLQR	AGPGPRPGPLQR		No
10000182522	100136	Q99708_743	Q99708	Q99708100136	CLADSFSQ	743	C	L	A	D	S	F	S	Q	17	964.407	2	-37	1928.81	47.139	28.1	5.1e-05	Abu-SFSQAADEEEELSTATK	SFSQAADEEEELSTATK		No
10000182524	100136	Q9H582_616	Q9H582	Q9H582100136	SCVDSFGS	616	S	C	V	D	S	F	G	S	12	463.923	3	-22	1391.77	33.886	39.6	0.00013	Abu-SFGSPLGLDKRK	SFGSPLGLDKRK		No
10000182526	100136	O60293_336	O60293	O60293100136	DTTDSSQG	336	D	T	T	D	S	S	Q	G	14	563.605	3	-32	1690.82	25.135	39.8	0.00014	Abu-SSQGLQDKEQNLTR	SSQGLQDKEQNLTR		No
10000182527	100136	Q9UKJ3_1296	Q9UKJ3	Q9UKJ3100136	ESTDGAED	1296	E	S	T	D	G	A	E	D	24	892.396	3	-38	2677.19	59.205	40.1	0.00015	Abu-GAEDASLAPLESQPITFTPEEMEK	GAEDASLAPLESQPITFTPEEMEK		No
10000182529	100136	Q13601_39	Q13601	Q13601100136	TVPDGWKE	39	T	V	P	D	G	W	K	E	14	437.215	4	-13	1748.86	31.188	37.5	5.8e-05	Abu-GWKEPAFSKEDNPR	GWKEPAFSKEDNPR		No
10000182530	100136	Q9BSI4_208	Q9BSI4	Q9BSI4100136	SVTDSVNL	208	S	V	T	D	S	V	N	L	17	684.319	3	-27	2052.96	38.005	38.7	9.7e-05	Abu-SVNLAEPMEQNPPQQQR	SVNLAEPMEQNPPQQQR		No
10000182531	100136	Q96T58_1575	Q96T58	Q96T58100136	STTDSIQE	1575	S	T	T	D	S	I	Q	E	12	499.598	3	-28	1498.8	45.352	40.8	0.00017	Abu-SIQEPVVLFHSR	SIQEPVVLFHSR		No
10000182536	100136	Q96I24_160	Q96I24	Q96I24100136	NDIDSNST	160	N	D	I	D	S	N	S	T	14	793.409	2	-44	1586.82	50.473	38.7	0.00011	Abu-SNSTIQEILIPASK	SNSTIQEILIPASK		No
10000182538	100136	Q7KZ85_1048	Q7KZ85	Q7KZ85100136	DSTDSYIE	1048	D	S	T	D	S	Y	I	E	10	612.304	2	-21	1224.61	46.226	30.7	0.0017	Abu-SYIEVLDGSR	SYIEVLDGSR		No
10000182540	100136	Q53F19_232	Q53F19	Q53F19100136	VELDTLSQ	232	V	E	L	D	T	L	S	Q	12	744.87	2	-39	1489.74	51.947	46.5	0.0002	Abu-TLSQVEEESLLR	TLSQVEEESLLR		No
10000182543	100136	Q7Z591_800	Q7Z591	Q7Z591100136	LEVDGVAA	800	L	E	V	D	G	V	A	A	13	438.566	3	-26	1315.7	18.501	44.8	0.00022	Abu-GVAATPGKAEATR	GVAATPGKAEATR		No
10000182548	100136	O00273_7	O00273	O00273100136	VTGDAGVP	7	V	T	G	D	A	G	V	P	10	550.274	2	-31	1100.55	26.338	30.4	0.01	Abu-AGVPESGEIR	AGVPESGEIR		No
10000182549	100136	O00273_222	O00273	O00273100136	EEVDAVDT	222	E	E	V	D	A	V	D	T	8	452.243	2	-13	904.485	21.602	36.1	0.018	Abu-AVDTGISR	AVDTGISR		No
10000182553	100136	Q9H0E9_561	Q9H0E9	Q9H0E9100136	VEADVAIG	561	V	E	A	D	V	A	I	G	15	542.968	3	-9.5	1628.91	35.078	40	0.00028	Abu-VAIGKGDETPLTNVK	VAIGKGDETPLTNVK		No
10000182554	100136	P06241_20	P06241	P06241100136	EERDGSLN	20	E	E	R	D	G	S	L	N	10	577.281	2	-4.9	1154.56	21.404	41.4	0.00028	Abu-GSLNQSSGYR	GSLNQSSGYR		No
10000182555	100136	Q68CP9_626	Q68CP9	Q68CP9100136	VRVDSVPD	626	V	R	V	D	S	V	P	D	27	710.339	4	-33	2841.36	42.206	34.7	3.1e-05	Abu-SVPDVSPAPSPAGIPHGSQTIGNHFQR	SVPDVSPAPSPAGIPHGSQTIGNHFQR		No
10000182561	100136	Q92664_19	Q92664	Q92664100136	TIADAFIA	19	T	I	A	D	A	F	I	A	20	697.693	3	-33	2093.08	44.116	44.4	0.00033	Abu-AFIAAGESSAPTPPRPALPR	AFIAAGESSAPTPPRPALPR		No
10000182565	100136	P09651_70	P09651	P09651100136	EEVDAAMN	70	E	E	V	D	A	A	M	N	13	377.7	4	-9.8	1510.8	15.428	30	0.02	Abu-AAMNARPHKVDGR	AAMNARPHKVDGR		No
10000182568	100136	A2RRP1_637	A2RRP1	A2RRP1100136	IDIDSISY	637	I	D	I	D	S	I	S	Y	16	938.407	2	-42	1876.81	44.505	36.5	7.8e-05	Abu-SISYEELSPPDEEPAK	SISYEELSPPDEEPAK		No
10000182569	100136	Q9H6R7_509	Q9H6R7	Q9H6R7100136	SICDGSIA	509	S	I	C	D	G	S	I	A	18	636.336	3	-16	1909.01	47.296	41.2	0.00037	Abu-GSIALDAEPVTQPASLPR	GSIALDAEPVTQPASLPR		No
10000182570	100136	Q8WWY3_387	Q8WWY3	Q8WWY3100136	IEEDAYQE	387	I	E	E	D	A	Y	Q	E	15	573.947	3	-26	1721.84	51.8	32	1.2e-05	Abu-AYQEDLGFSLGHLGK	AYQEDLGFSLGHLGK		No
10000182573	100136	Q9H175_40	Q9H175	Q9H175100136	DSCDSLNP	40	D	S	C	D	S	L	N	P	18	672.674	3	-52	2018.02	51.221	35.2	5.2e-05	Abu-SLNPPTTASFTPTSILKR	SLNPPTTASFTPTSILKR		No
10000182577	100136	Q8IY81_347	Q8IY81	Q8IY81100136	DEEDSTAG	347	D	E	E	D	S	T	A	G	30	877.871	4	-43	3511.48	50.581	33.8	3.1e-05	Abu-STAGTTKQPSKEEEEEEEEEQLNQTLAEMK	STAGTTKQPSKEEEEEEEEEQLNQTLAEMK		No
10000182578	100136	Q9BWT1_40	Q9BWT1	Q9BWT1100136	DSCDSFAS	40	D	S	C	D	S	F	A	S	11	657.791	2	-24	1315.58	34.874	37.5	0.00015	Abu-SFASDNFANTR	SFASDNFANTR		No
10000182579	100136	Q8IZ73_442	Q8IZ73	Q8IZ73100136	GLTDSTAP	442	G	L	T	D	S	T	A	P	22	772.706	3	-23	2318.12	53.451	34	3.4e-05	Abu-STAPSSELGKDDLEELAAAAQK	STAPSSELGKDDLEELAAAAQK		No
10000182580	100136	Q9UPN6_381	Q9UPN6	Q9UPN6100136	EGQDGVEE	381	E	G	Q	D	G	V	E	E	12	739.843	2	-15	1479.69	42.868	37.9	0.00018	Abu-GVEEEVFEQEAK	GVEEEVFEQEAK		No
10000182585	100136	Q96T37_751	Q96T37	Q96T37100136	DRSDGSAP	751	D	R	S	D	G	S	A	P	12	583.282	2	-11	1166.56	13.097	45.6	0.0005	Abu-GSAPSTSTASSK	GSAPSTSTASSK		No
10000182588	100136	Q5JSZ5_1777	Q5JSZ5	Q5JSZ5100136	IHVDSVLP	1777	I	H	V	D	S	V	L	P	15	825.947	2	-37	1651.89	61.734	43.3	0.0005	Abu-SVLPVPPIEFGVSPK	SVLPVPPIEFGVSPK		No
10000182591	100136	Q9Y6K1_439	Q9Y6K1	Q9Y6K1100136	VYTDMWVE	439	V	Y	T	D	M	W	V	E	20	573.545	4	-18	2294.18	44.086	38.5	0.00027	Abu-MWVEPEAAAYAPPPPAKKPR	MWVEPEAAAYAPPPPAKKPR		No
10000182598	100136	Q96EY5_173	Q96EY5	Q96EY5100136	LSLDAASQ	173	L	S	L	D	A	A	S	Q	13	466.921	3	-16	1400.76	23.825	44.8	0.00059	Abu-AASQPSKGGLLER	AASQPSKGGLLER		No
10000182599	100136	Q9H6X5_369	Q9H6X5	Q9H6X5100136	LSLDGLAP	369	L	S	L	D	G	L	A	P	21	781.998	3	-47	2345.99	42.198	32.8	2.8e-05	Abu-GLAPAVSENSDLEQEEESAQR	GLAPAVSENSDLEQEEESAQR		No
10000182600	100136	Q04864_87	Q04864	Q04864100136	DCRDGYYE	87	D	C	R	D	G	Y	Y	E	11	717.296	2	-34	1434.59	38.521	32.4	2.4e-05	Abu-GYYEAEFGQER	GYYEAEFGQER		No
10000182606	100136	P08047_200	P08047	P08047100136	VQQDGSGQ	200	V	Q	Q	D	G	S	G	Q	19	698.358	3	-41	2095.08	47.784	45.4	0.00069	Abu-GSGQIQIIPGANQQIITNR	GSGQIQIIPGANQQIITNR		No
10000182617	100136	Q8IYW5_251	Q8IYW5	Q8IYW5100136	VRKDSVSK	251	V	R	K	D	S	V	S	K	11	431.873	3	-17	1295.62	20.369	35	0.0001	Abu-SVSKDIDSSDR	SVSKDIDSSDR		No
10000182619	100136	Q86XZ4_146	Q86XZ4	Q86XZ4100136	ESVDSLSE	146	E	S	V	D	S	L	S	E	14	788.385	2	-37	1576.77	58.209	37.1	0.00027	Abu-SLSEGLETLSIDAR	SLSEGLETLSIDAR		No
10000182620	100136	Q9UHR6_145	Q9UHR6	Q9UHR6100136	EELDNAPG	145	E	E	L	D	N	A	P	G	16	833.892	2	-37	1667.78	40.992	45.4	0.00094	Abu-NAPGSDAAELELAPAR	NAPGSDAAELELAPAR		No
10000182627	100136	P98171_404	P98171	P98171100136	DVLDSFQT	404	D	V	L	D	S	F	Q	T	12	698.835	2	-24	1397.67	32.943	38	0.00046	Abu-SFQTSPSTESLK	SFQTSPSTESLK		No
10000182628	100136	Q5T1V6_44	Q5T1V6	Q5T1V6100136	VPVDAVAT	44	V	P	V	D	A	V	A	T	11	601.815	2	-13	1203.63	29.977	40.5	0.0011	Abu-AVATEAATIDR	AVATEAATIDR		No
10000182680	100136	Q13043_350	Q13043	Q13043100136	TMTDGANT	350	T	M	T	D	G	A	N	T	35	801.4	5	31	4007	63.809	35	0.00013	Abu-GANTMIEHDDTLPSQLGTMVINAEDEEEEGTMKRR	GANTMIEHDDTLPSQLGTMVINAEDEEEEGTMKRR		No
10000182681	100136	Q8N108_28	Q8N108	Q8N108100136	PSADMLVH	28	P	S	A	D	M	L	V	H	10	454.539	3	-8.6	1363.62	35.949	31.9	3.7e-05	Abu-MLVHDFDDER	MLVHDFDDER		No
10000182682	100136	O60493_33	O60493	O60493100136	LEIDVSNP	33	L	E	I	D	V	S	N	P	11	599.821	2	-16	1199.64	22.442	42.9	0.0012	Abu-VSNPQTVGVGR	VSNPQTVGVGR		No
10000182688	100136	Q5JTV8_227	Q5JTV8	Q5JTV8100136	DDQDSSHS	227	D	D	Q	D	S	S	H	S	12	448.911	3	-3.1	1346.73	13.043	35.3	0.00018	Abu-SSHSSVTTVKAR	SSHSSVTTVKAR		No
10000182694	100136	Q6DN90_235	Q6DN90	Q6DN90100136	DFADAITE	235	D	F	A	D	A	I	T	E	11	668.83	2	-16	1337.66	57.357	34.4	0.00013	Abu-AITELEDAFSR	AITELEDAFSR		No
10000182699	100136	Q99996_1034	Q99996	Q99996100136	SLLDGVVT	1034	S	L	L	D	G	V	V	T	8	476.249	2	-2.1	952.498	16.534	26.4	0.0038	Abu-GVVTM(Oxidation)TSR	GVVTMTSR		No
10000182703	100136	Q6P996_585	Q6P996	Q6P996100136	DNVDAAEL	585	D	N	V	D	A	A	E	L	13	700.867	2	-34	1401.73	53.907	41.4	0.0016	Abu-AAELVETIAATAR	AAELVETIAATAR		No
10000182709	100136	Q8NCN2_136	Q8NCN2	Q8NCN2100136	GDVDSVTV	136	G	D	V	D	S	V	T	V	13	730.335	2	-27	1460.67	27.871	40.4	0.0017	Abu-SVTVGAEENPESR	SVTVGAEENPESR		No
10000182710	100136	Q9Y6Q9_1013	Q9Y6Q9	Q9Y6Q9100136	SWPDGMLS	1013	S	W	P	D	G	M	L	S	19	560.524	4	-31	2242.1	42.712	35.2	0.00022	Abu-GMLSMEQVSHGTQNRPLLR	GMLSMEQVSHGTQNRPLLR		No
10000182714	100136	Q8NDC0_10	Q8NDC0	Q8NDC0100136	SLADALPE	10	S	L	A	D	A	L	P	E	9	517.772	2	-25	1035.54	18.201	24.4	0.016	Abu-ALPEHSPAK	ALPEHSPAK		No
10000182715	100136	Q96MG7_42	Q96MG7	Q96MG7100136	VLRDGFAE	42	V	L	R	D	G	F	A	E	11	618.79	2	-11	1237.58	28.13	41	0.0019	Abu-GFAEEAPSTSR	GFAEEAPSTSR		No
10000182719	100136	Q9HCN4_312	Q9HCN4	Q9HCN4100136	TAKDSLSP	312	T	A	K	D	S	L	S	P	15	578.307	3	-52	1734.92	53.265	33.9	0.00016	Abu-SLSPVLHPSDLILTR	SLSPVLHPSDLILTR		No
10000182729	100136	P35611_634	P35611	P35611100136	DDSDAATF	634	D	D	S	D	A	A	T	F	27	996.123	3	-53	2988.37	66.811	32.8	0.00011	Abu-AATFKPTLPDLSPDEPSEALGFPMLEK	AATFKPTLPDLSPDEPSEALGFPMLEK		No	TRUE
10000182733	100136	P56524_9	P56524	P56524100136	SHPDGLSG	9	S	H	P	D	G	L	S	G	16	602.992	3	-11	1808.98	44.19	34.9	0.0003	Abu-GLSGRDQPVELLNPAR	GLSGRDQPVELLNPAR		No
10000182734	100136	Q9NU22_5128	Q9NU22	Q9NU22100136	VDTDSHAE	5128	V	D	T	D	S	H	A	E	25	704.823	4	-19	2819.29	41.153	34.2	0.00022	Abu-SHAEQGPAQQPQAQVEDADAFEHIK	SHAEQGPAQQPQAQVEDADAFEHIK		No
10000182738	100136	P30260_237	P30260	P30260100136	SYIDSAVI	237	S	Y	I	D	S	A	V	I	20	1014.51	2	-56	2029.02	54.128	38.7	0.0016	Abu-SAVISPDTVPLGTGTSILSK	SAVISPDTVPLGTGTSILSK		No
10000182740	100136	P09234_11	P09234	P09234100136	DYCDTYLT	11	D	Y	C	D	T	Y	L	T	11	454.227	3	-15	1362.68	25.984	31.6	8.2e-05	Abu-TYLTHDSPSVR	TYLTHDSPSVR		No
10000182741	100136	Q9H9J4_765	Q9H9J4	Q9H9J4100136	EEPDAAAG	765	E	E	P	D	A	A	A	G	9	445.75	2	-2.0	891.5	15.906	34.3	0.00026	Abu-AAAGLSSTK	AAAGLSSTK		No
10000182747	100136	Q9HCM1_360	Q9HCM1	Q9HCM1100136	SSVDGVQT	360	S	S	V	D	G	V	Q	T	12	701.846	2	-23	1403.69	27.785	36.6	0.00077	Abu-GVQTLAQTNEEK	GVQTLAQTNEEK		No
10000182749	100136	Q9H0C8_40	Q9H0C8	Q9H0C8100136	SSTDSGSG	40	S	S	T	D	S	G	S	G	32	1055.14	3	-43	3165.43	71.577	32.1	0.00012	Abu-SGSGGPLLFDDLPPASSGDSGSLATSISQMVK	SGSGGPLLFDDLPPASSGDSGSLATSISQMVK		No
10000182750	100136	P36954_5	P36954	P36954100136	MEPDGTYE	5	M	E	P	D	G	T	Y	E	11	640.821	2	-23	1281.64	43.118	34.8	0.00037	Abu-GTYEPGFVGIR	GTYEPGFVGIR		No
10000182752	100136	Q7Z3K3_28	Q7Z3K3	Q7Z3K3100136	VIEDSVVE	28	V	I	E	D	S	V	V	E	11	670.295	2	-42	1340.59	31.483	30.9	7.6e-05	Abu-SVVEDYNSVDK	SVVEDYNSVDK		No
10000182754	100136	Q5VWN6_1208	Q5VWN6	Q5VWN6100136	VEVDSSSA	1208	V	E	V	D	S	S	S	A	10	526.261	2	-22	1052.52	17.103	35.9	0.00065	Abu-SSSASTTLGR	SSSASTTLGR		No
10000182756	100136	Q5JRA6_710	Q5JRA6	Q5JRA6100136	DQTDSTGG	710	D	Q	T	D	S	T	G	G	10	525.275	2	-18	1050.55	31.266	33.7	0.00026	Abu-STGGPAFLSK	STGGPAFLSK		No
10000182757	100136	Q9Y618_378	Q9Y618	Q9Y618100136	EIIDGLSE	378	E	I	I	D	G	L	S	E	10	616.297	2	-23	1232.59	27.704	43.5	0.0039	Abu-GLSEQENLEK	GLSEQENLEK		No
10000182774	100136	Q6ZNE5_29	Q6ZNE5	Q6ZNE5100136	DLVDSVDD	29	D	L	V	D	S	V	D	D	14	804.37	2	-36	1608.74	49.665	35.1	0.00063	Abu-SVDDAEGLYVAVER	SVDDAEGLYVAVER		No
10000182777	100136	P08134_91	P08134	P08134100136	DSPDSLEN	91	D	S	P	D	S	L	E	N	14	585.632	3	-28	1756.9	48.402	34.8	0.00056	Abu-SLENIPEKWTPEVK	SLENIPEKWTPEVK	yes	No
10000182789	100136	Q5M775_214	Q5M775	Q5M775100136	PNVDGTSV	214	P	N	V	D	G	T	S	V	14	766.346	2	-37	1532.69	33.378	38	0.0023	Abu-GTSVSPGDTEPMIR	GTSVSPGDTEPMIR		No
10000182790	100136	O75113_491	O75113	O75113100136	PETDGLSP	491	P	E	T	D	G	L	S	P	12	606.323	2	-20	1212.65	27.813	49.5	0.0056	Abu-GLSPSVASPSPK	GLSPSVASPSPK		No
10000182791	100136	O75676_378	O75676	O75676100136	VMTDGLEA	378	V	M	T	D	G	L	E	A	13	446.554	3	-34	1339.66	25.61	36.5	0.0013	Abu-GLEAPGAGDRPGR	GLEAPGAGDRPGR		No
10000182795	100136	Q8IWU2_901	Q8IWU2	Q8IWU2100136	TESDSVLA	901	T	E	S	D	S	V	L	A	11	622.831	2	-24	1245.66	49.927	41.2	0.0062	Abu-SVLADDILASR	SVLADDILASR		No
10000182799	100136	O95801_255	O95801	O95801100136	LFLDGLST	255	L	F	L	D	G	L	S	T	11	408.54	3	-5.1	1225.62	17.813	32.2	0.00024	Abu-GLSTENPHGAR	GLSTENPHGAR		No
10000182807	100136	P23368_380	P23368	P23368100136	TFEDAVNI	380	T	F	E	D	A	V	N	I	18	608.025	3	-16	1824.08	53.973	33.6	0.00049	Abu-AVNILKPSTIIGVAGAGR	AVNILKPSTIIGVAGAGR		No
10000182810	100136	P55735_15	P55735	P55735100136	SHEDMIHD	15	S	H	E	D	M	I	H	D	13	562.574	3	-19	1687.72	35.597	32.6	0.00032	Abu-MIHDAQMDYYGTR	MIHDAQMDYYGTR		No
10000182812	100136	Q7L2E3_207	Q7L2E3	Q7L2E3100136	DVTDFLSM	207	D	V	T	D	F	L	S	M	17	519.246	4	-24	2076.99	37.074	31.8	0.00024	Abu-FLSMTQQDSHAPLRDSR	FLSMTQQDSHAPLRDSR		No
10000182813	100136	Q5T0F9_461	Q5T0F9	Q5T0F9100136	VEEDAVAA	461	V	E	E	D	A	V	A	A	11	550.805	2	-26	1101.61	32.823	39.7	0.0069	Abu-AVAATLAAAEK	AVAATLAAAEK		No
10000182816	100136	Q5T0D9_10	Q5T0D9	Q5T0D9100136	DSVDSAGT	10	D	S	V	D	S	A	G	T	34	1006.49	3	-26	3019.48	50.398	32.5	0.00032	Abu-SAGTSPTAVLAAGEEVGAGGGPGGGRPGAGTPLR	SAGTSPTAVLAAGEEVGAGGGPGGGRPGAGTPLR		No
10000182817	100136	P51532_156	P51532	P51532100136	APLDGADP	156	A	P	L	D	G	A	D	P	26	743.4	4	25	2973.6	42.493	33.2	0.00045	Abu-GADPQALGQQNRGPTPFNQNQLHQLR	GADPQALGQQNRGPTPFNQNQLHQLR		No
10000182818	100136	Q6NZY4_344	Q6NZY4	Q6NZY4100136	DGTDGETE	344	D	G	T	D	G	E	T	E	12	708.831	2	-29	1417.66	26.941	39	0.0054	Abu-GETEVGEIQQNK	GETEVGEIQQNK		No
10000182819	100136	Q8WUI4_413	Q8WUI4	Q8WUI4100136	LETDGGGP	413	L	E	T	D	G	G	G	P	15	526.582	3	-22	1579.75	33.532	29.4	9.2e-05	Abu-GGGPGQVVDDGLEHR	GGGPGQVVDDGLEHR		No
10000182826	100136	Q9NRZ9_23	Q9NRZ9	Q9NRZ9100136	EQLDTAVI	23	E	Q	L	D	T	A	V	I	22	829.073	3	-18	2487.22	64.098	35.6	0.0014	Abu-TAVITPAMLEEEEQLEAAGLER	TAVITPAMLEEEEQLEAAGLER		No
10000182827	100136	Q9NTM9_34	Q9NTM9	Q9NTM9100136	VCVDSVES	34	V	C	V	D	S	V	E	S	10	573.786	2	-9.5	1147.57	28.874	36.9	0.0024	Abu-SVESAVNAER	SVESAVNAER		No
10000182831	100136	P14314_227	P14314	P14314100136	DDMDGTVS	227	D	D	M	D	G	T	V	S	45	1200.02	4	-33	4800.07	65.62	25.3	1.8e-05	Abu-GTVSVTELQTHPELDTDGDGALSEAEAQALLSGDTQTDATSFYDR	GTVSVTELQTHPELDTDGDGALSEAEAQALLSGDTQTDATSFYDR		No
10000182833	100136	Q86UX7_345	Q86UX7	Q86UX7100136	DVLDSLTT	345	D	V	L	D	S	L	T	T	13	402.724	4	-23	1610.9	43.62	34.8	0.0011	Abu-SLTTIPELKDHLR	SLTTIPELKDHLR		No
10000182845	100136	Q99569_804	Q99569	Q99569100136	DQWDGVGP	804	D	Q	W	D	G	V	G	P	10	505.287	2	-37	1010.57	40.336	32.2	0.00041	Abu-GVGPIPGLSK	GVGPIPGLSK		No
10000182846	100136	Q8IY37_574	Q8IY37	Q8IY37100136	DLGDGGQD	574	D	L	G	D	G	G	Q	D	28	996.147	3	-42	2988.44	74.376	34	0.00094	Abu-GGQDGGEQPDASLPLHVLPLYSLLAPEK	GGQDGGEQPDASLPLHVLPLYSLLAPEK		No
10000182850	100136	Q8NEF9_212	Q8NEF9	Q8NEF9100136	SEKDSVVS	212	S	E	K	D	S	V	V	S	9	531.282	2	-25	1062.56	29.714	37.2	0.0039	Abu-SVVSLESQK	SVVSLESQK		No
10000182852	100136	Q6P1L5_375	Q6P1L5	Q6P1L5100136	DIPDGHRA	375	D	I	P	D	G	H	R	A	11	438.253	3	-12	1314.76	19.655	32.9	0.00068	Abu-GHRAPPPLVQR	GHRAPPPLVQR		No
10000182858	100136	Q8TAK5_305	Q8TAK5	Q8TAK5100136	TVQDGQQV	305	T	V	Q	D	G	Q	Q	V	11	591.838	2	-13	1183.68	30.918	33.2	0.00085	Abu-GQQVLTVPAGK	GQQVLTVPAGK		No
10000182861	100136	Q5T8I9_14	Q5T8I9	Q5T8I9100136	SVVDGNFE	14	S	V	V	D	G	N	F	E	20	619.811	4	-31	2479.24	51.172	30.4	0.0073	Abu-GNFEEVPRETAIQFKPPLYR	GNFEEVPRETAIQFKPPLYR		No
10000182863	100136	Q13459_1704	Q13459	Q13459100136	VCVDSLTS	1704	V	C	V	D	S	L	T	S	15	557.979	3	-18	1673.94	42.034	34	0.0013	Abu-SLTSDKASVPIVLEK	SLTSDKASVPIVLEK		No
10000182873	100136	O94986_63	O94986	O94986100136	DGTDGQPH	63	D	G	T	D	G	Q	P	H	20	626.031	4	-27	2504.13	48.478	36	0.0033	Abu-GQPHHPEQLEMSWNEQMLPK	GQPHHPEQLEMSWNEQMLPK		No
10000182874	100136	Q9ULR0_168	Q9ULR0	Q9ULR0100136	DEDDGVIV	168	D	E	D	D	G	V	I	V	12	744.88	2	-28	1489.76	46.97	35	0.0021	Abu-GVIVPLEQEYEK	GVIVPLEQEYEK		No
10000182879	100136	Q96CF2_84	Q96CF2	Q96CF2100136	TQIDGTLS	84	T	Q	I	D	G	T	L	S	10	618.822	2	-18	1237.64	41.462	34.6	0.0019	Abu-GTLSTIEFQR	GTLSTIEFQR	yes	No
10000182884	100136	Q13136_219	Q13136	Q13136100136	TLTDGVLD	219	T	L	T	D	G	V	L	D	19	542.514	4	-18	2170.06	28.992	30.5	0.00037	Abu-GVLDINHEQENTPSTSGKR	GVLDINHEQENTPSTSGKR		No
10000182886	100136	O95402_408	O95402	O95402100136	VNLDGQVA	408	V	N	L	D	G	Q	V	A	12	432.576	3	-23	1297.73	20.155	32.8	0.001	Abu-GQVAEAGVKPVR	GQVAEAGVKPVR		No
10000182889	100136	Q8IWJ2_8	Q8IWJ2	Q8IWJ2100136	LVQDGVAS	8	L	V	Q	D	G	V	A	S	12	564.297	2	-16	1128.59	20.619	35.5	0.0033	Abu-GVASPATPGTGK	GVASPATPGTGK		No
10000182890	100136	P47756_150	P47756	P47756100136	GCWDSIHV	150	G	C	W	D	S	I	H	V	10	418.229	3	-14	1254.69	28.877	33.5	0.0014	Abu-SIHVVEVQEK	SIHVVEVQEK		No
10000182891	100136	Q96IZ7_239	Q96IZ7	Q96IZ7100136	IESDSFVQ	239	I	E	S	D	S	F	V	Q	8	549.273	2	-32	1098.55	37.844	32.6	0.00099	Abu-SFVQQTFR	SFVQQTFR		No
10000182893	100136	P51957_381	P51957	P51957100136	SVSDGFVQ	381	S	V	S	D	G	F	V	Q	9	580.28	2	-29	1160.56	24.463	33.9	0.0018	Abu-GFVQENQPR	GFVQENQPR		No
10000182899	100136	Q9Y2K2_384	Q9Y2K2	Q9Y2K2100136	VEPDGTLN	384	V	E	P	D	G	T	L	N	20	1107	2	-32	2213.99	50.459	24.1	3e-05	Abu-GTLNLDSDEGEEPSPEALVR	GTLNLDSDEGEEPSPEALVR		No
10000182904	100136	Q3T8J9_482	Q3T8J9	Q3T8J9100136	VCMDSFQP	482	V	C	M	D	S	F	Q	P	13	806.361	2	-43	1612.72	59.82	33.4	0.0017	Abu-SFQPMDDSLIAFR	SFQPMDDSLIAFR		No
10000182905	100136	Q9Y6J0_1740	Q9Y6J0	Q9Y6J0100136	DAGDSADQ	1740	D	A	G	D	S	A	D	Q	15	444.463	4	-21	1777.85	10.637	36	0.0052	Abu-SADQSGERKDKESPR	SADQSGERKDKESPR		No
10000182907	100136	Q7L4P6_104	Q7L4P6	Q7L4P6100136	VEEDGEVK	104	V	E	E	D	G	E	V	K	14	579.272	3	-27	1737.82	39.293	31.7	0.00085	Abu-GEVKDYGEEDLQLR	GEVKDYGEEDLQLR		No
10000182909	100136	Q9BXP5_162	Q9BXP5	Q9BXP5100136	SLDDSVDE	162	S	L	D	D	S	V	D	E	10	406.876	3	-16	1220.63	21.136	32.4	0.0012	Abu-SVDETEAVKR	SVDETEAVKR		No
10000182910	100136	Q6ZSR9_118	Q6ZSR9	Q6ZSR9100136	PATDGLSE	118	P	A	T	D	G	L	S	E	14	802.39	2	-47	1604.78	64.573	29.9	0.00042	Abu-GLSEPDVFAIAPFR	GLSEPDVFAIAPFR		No
10000182913	100136	Q9HCD5_154	Q9HCD5	Q9HCD5100136	DSFDGRGP	154	D	S	F	D	G	R	G	P	12	437.219	3	-14	1311.66	15.995	31.8	0.00097	Abu-GRGPPGPESQSR	GRGPPGPESQSR		No
10000182914	100136	O00499_302	O00499	O00499100136	SPPDGSPA	302	S	P	P	D	G	S	P	A	10	542.274	2	-36	1084.55	25.011	31.9	0.001	Abu-GSPAATPEIR	GSPAATPEIR		No
10000182916	100136	Q13367_844	Q13367	Q13367100136	TLTDSTLV	844	T	L	T	D	S	T	L	V	16	827.449	2	-38	1654.9	58.202	35.8	0.0054	Abu-STLVPSLLSPVSGVGR	STLVPSLLSPVSGVGR		No
10000182919	100136	Q7Z417_452	Q7Z417	Q7Z417100136	SGTDSVLQ	452	S	G	T	D	S	V	L	Q	17	635.653	3	-29	1906.96	62.358	32.4	0.0013	Abu-SVLQDMSLTSAAVEQIK	SVLQDMSLTSAAVEQIK		No
10000182920	100136	P09661_46	P09661	P09661100136	DQFDAIDF	46	D	Q	F	D	A	I	D	F	10	632.792	2	-31	1265.58	41.402	34.1	0.0027	Abu-AIDFSDNEIR	AIDFSDNEIR		No
10000182921	100136	P62310_7	P62310	P62310100136	DDVDQQQT	7	D	D	V	D	Q	Q	Q	T	16	657.332	3	-18	1972	51.496	37	0.0095	Abu-QQQTTNTVEEPLDLIR	QQQTTNTVEEPLDLIR		No
10000182928	100136	Q9H2G2_404	Q9H2G2	Q9H2G2100136	HITDAQLE	404	H	I	T	D	A	Q	L	E	12	500.244	3	-9.7	1500.73	37.593	28.1	0.00023	Abu-AQLEAMTELHDR	AQLEAMTELHDR		No
10000182931	100136	Q9UL40_14	Q9UL40	Q9UL40100136	QAADGGAA	14	Q	A	A	D	G	G	A	A	27	741.837	4	-27	2967.35	46.142	31.6	0.0011	Abu-GGAAGPYSSSELLEGQEPDGVRFDRER	GGAAGPYSSSELLEGQEPDGVRFDRER		No
10000182936	100136	P80303_259	P80303	P80303100136	VNSDGFLD	259	V	N	S	D	G	F	L	D	14	862.905	2	-41	1725.81	73.384	31.1	0.00097	Abu-GFLDEQELEALFTK	GFLDEQELEALFTK		No
10000182939	100136	Q9H5J8_11	Q9H5J8	Q9H5J8100136	DSLDHVTS	11	D	S	L	D	H	V	T	S	12	466.234	3	-22	1398.7	28.159	31.1	0.0011	Abu-HVTSDAVELANR	HVTSDAVELANR		No
10000182945	100136	Q6NYC8_496	Q6NYC8	Q6NYC8100136	ATVDAAVP	496	A	T	V	D	A	A	V	P	9	442.269	2	-5.5	884.538	12.06	28.1	0.018	Abu-AAVPGAGKK	AAVPGAGKK		No
10000182946	100136	Q5T6F2_263	Q5T6F2	Q5T6F2100136	TTEDWTED	263	T	T	E	D	W	T	E	D	9	597.269	2	-32	1194.54	34.115	32.1	0.0019	Abu-WTEDLSETK	WTEDLSETK		No
10000182947	100136	P55957_76	P55957	P55957100136	IEADSESQ	76	I	E	A	D	S	E	S	Q	9	581.274	2	-29	1162.55	26.598	33.6	0.0037	Abu-SESQEDIIR	SESQEDIIR		No
10000182951	100136	Q8IWB9_357	Q8IWB9	Q8IWB9100136	SEGDGYGS	357	S	E	G	D	G	Y	G	S	10	575.76	2	-31	1151.52	27.373	27.7	0.00033	Abu-GYGSDSNIPR	GYGSDSNIPR		No
10000182952	100136	P09874_215	P09874	P09874100136	DEVDGVDE	215	D	E	V	D	G	V	D	E	8	465.756	2	-23	931.511	15.423	27.4	0.0064	Abu-GVDEVAKK	GVDEVAKK		No
10000182955	100136	O00299_142	O00299	O00299100136	KVLDNYLT	142	K	V	L	D	N	Y	L	T	24	917.376	3	-54	2752.13	52.303	29.1	0.00066	Abu-NYLTSPLPEEVDETSAEDEGVSQR	NYLTSPLPEEVDETSAEDEGVSQR		No
10000182960	100136	Q7Z7A1_1396	Q7Z7A1	Q7Z7A1100136	DFIDGNVE	1396	D	F	I	D	G	N	V	E	14	838.908	2	-19	1677.82	62.683	25.9	0.00017	Abu-GNVESLMTELEIEK	GNVESLMTELEIEK		No
10000182961	100136	Q6FI81_215	Q6FI81	Q6FI81100136	DLIDSDEL	215	D	L	I	D	S	D	E	L	19	556.535	4	-14	2226.14	47.83	29.9	0.001	Abu-SDELLDPEDLKKPDPASLR	SDELLDPEDLKKPDPASLR		No
10000182965	100136	Q9UIL1_88	Q9UIL1	Q9UIL1100136	DAVDAENQ	88	D	A	V	D	A	E	N	Q	10	637.286	2	-48	1274.57	25.369	32.7	0.0034	Abu-AENQVELEEK	AENQVELEEK		No
10000182967	100136	P43403_291	P43403	P43403100136	LNSDGYTP	291	L	N	S	D	G	Y	T	P	8	488.235	2	-28	976.469	20.863	28.6	0.00062	Abu-GYTPEPAR	GYTPEPAR		No
10000182969	100136	Q9BVX2_24	Q9BVX2	Q9BVX2100136	DDRDGLLA	24	D	D	R	D	G	L	L	A	23	913.418	3	-50	2740.25	64.363	31.1	0.0019	Abu-GLLAEREQEEAIAQFPYVEFTGR	GLLAEREQEEAIAQFPYVEFTGR		No
10000182973	100136	O95644_111	O95644	O95644100136	TRPDGAPA	111	T	R	P	D	G	A	P	A	9	491.761	2	-18	983.522	25.778	32.1	0.0031	Abu-GAPALESPR	GAPALESPR		No
10000182977	100136	Q13442_25	Q13442	Q13442100136	EEIDAQLQ	25	E	E	I	D	A	Q	L	Q	11	452.593	3	-8.2	1357.78	13.555	29.4	0.001	Abu-AQLQAEKQKAR	AQLQAEKQKAR		No
10000182983	100136	Q96PY6_950	Q96PY6	Q96PY6100136	VSEDGVSS	950	V	S	E	D	G	V	S	S	25	684.814	4	-26	2739.26	45.637	33.7	0.008	Abu-GVSSTVDQLSDIHIEPGTNDSQHSK	GVSSTVDQLSDIHIEPGTNDSQHSK		No
10000182985	100136	P46013_411	P46013	P46013100136	DAADSATK	411	D	A	A	D	S	A	T	K	11	416.218	3	-20	1248.65	15.92	29.9	0.0017	Abu-SATKPENLSSK	SATKPENLSSK		No
10000182987	100136	Q8WXG6_1178	Q8WXG6	Q8WXG6100136	TDQDSVIG	1178	T	D	Q	D	S	V	I	G	12	657.354	2	-45	1314.71	49.487	35	0.015	Abu-SVIGVSPAVMIR	SVIGVSPAVMIR		No
10000182992	100136	O15234_390	O15234	O15234100136	AAPDAAPP	390	A	A	P	D	A	A	P	P	12	458.242	3	-34	1374.73	23.143	29.2	0.0014	Abu-AAPPPPDRPIEK	AAPPPPDRPIEK		No
10000182999	100136	P06400_347	P06400	P06400100136	LQTDSIDS	347	L	Q	T	D	S	I	D	S	9	584.277	2	-15	1168.55	35.942	31.4	0.0038	Abu-SIDSFETQR	SIDSFETQR		No
10000183000	100136	Q53TQ3_679	Q53TQ3	Q53TQ3100136	AQSDGVPV	679	A	Q	S	D	G	V	P	V	10	592.801	2	-27	1185.6	33.173	31.4	0.0038	Abu-GVPVQELSDR	GVPVQELSDR		No
10000183001	100136	Q9BY77_235	Q9BY77	Q9BY77100136	VQNDAYTA	235	V	Q	N	D	A	Y	T	A	12	666.35	2	-30	1332.7	42.986	31.4	0.0039	Abu-AYTAPALPSSIR	AYTAPALPSSIR		No
10000183004	100136	O75427_359	O75427	O75427100136	DFIDSHVP	359	D	F	I	D	S	H	V	P	10	413.85	3	-20	1241.55	17.588	27.9	0.00093	Abu-SHVPGEDEER	SHVPGEDEER		No
10000183005	100136	Q9P0L2_23	Q9P0L2	Q9P0L2100136	TSVDGYTE	23	T	S	V	D	G	Y	T	E	11	452.556	3	-31	1357.67	26.972	28.1	0.001	Abu-GYTEPHIQPTK	GYTEPHIQPTK		No
10000183007	100136	O94988_921	O94988	O94988100136	DDADGFIS	921	D	D	A	D	G	F	I	S	13	507.255	3	-21	1521.76	42.446	31.8	0.005	Abu-GFISPMDDKIPSK	GFISPMDDKIPSK		No
10000183008	100136	Q86WB0_450	Q86WB0	Q86WB0100136	TEPDASAP	450	T	E	P	D	A	S	A	P	10	549.774	2	-16	1099.55	28.772	33.1	0.009	Abu-ASAPAEPGWK	ASAPAEPGWK		No
10000183009	100136	P23396_33	P23396	P23396100136	LAEDGYSG	33	L	A	E	D	G	Y	S	G	8	476.241	2	-16	952.482	27.189	26.7	0.00059	Abu-GYSGVEVR	GYSGVEVR		No
10000183012	100136	Q96C57_73	Q96C57	Q96C57100136	HEQDGNEL	73	H	E	Q	D	G	N	E	L	11	688.831	2	-18	1377.66	35.826	33.5	0.011	Abu-GNELQTTPEFR	GNELQTTPEFR		No
10000183020	100136	O60784_158	O60784	O60784100136	TDLDMLSP	158	T	D	L	D	M	L	S	P	10	427.555	3	-22	1282.66	27.909	27.1	0.0009	Abu-M(Oxidation)LSPIHTPQR	MLSPIHTPQR		No
10000183023	100136	P54578_77	P54578	P54578100136	GSADALPE	77	G	S	A	D	A	L	P	E	9	513.761	2	-31	1027.52	25.853	32	0.0079	Abu-ALPEEPSAK	ALPEEPSAK		No
10000183026	100136	P50548_192	P50548	P50548100136	DCSDGTSE	192	D	C	S	D	G	T	S	E	14	807.363	2	-28	1614.73	38.42	33	0.013	Abu-GTSELEEPLGEDPR	GTSELEEPLGEDPR		No
10000183030	100136	Q96II8_643	Q96II8	Q96II8100136	DSTDSITG	643	D	S	T	D	S	I	T	G	8	474.245	2	-8.7	948.489	15.428	33.3	0.016	Abu-SITGQNSR	SITGQNSR		No
10000183033	100136	Q9NUM4_20	Q9NUM4	Q9NUM4100136	DAYDGVTS	20	D	A	Y	D	G	V	T	S	8	489.725	2	-26	979.45	18.584	31.3	0.0068	Abu-GVTSENMR	GVTSENMR		No
10000183034	100136	Q86VB7_300	Q86VB7	Q86VB7100136	DSYDAAVA	300	D	S	Y	D	A	A	V	A	19	658.337	3	-17	1975.01	42.62	29.9	0.0038	Abu-AAVACKQLGC(Carboxymethyl)PTAVTAIGR	AAVACKQLGCPTAVTAIGR		No
10000183052	100136	P78527_3212	P78527	P78527100136	VDQDGDPS	3212	V	D	Q	D	G	D	P	S	21	840.033	3	-35	2520.1	55.083	25.4	0.00072	Abu-GDPSDRMEVQEQEEDISSLIR	GDPSDRMEVQEQEEDISSLIR		No
10000183056	100136	Q9P1Z2_135	Q9P1Z2	Q9P1Z2100136	EEADGGSD	135	E	E	A	D	G	G	S	D	11	591.845	2	-22	1183.69	49.932	31.6	0.011	Abu-GGSDILLVVPK	GGSDILLVVPK		No
10000183063	100136	A0JNW5_1174	A0JNW5	A0JNW5100136	TSPDAIST	1174	T	S	P	D	A	I	S	T	23	859.391	3	-27	2578.17	53.798	26.2	0.0013	Abu-AISTNSEGAQENHDDLMSVVVFK	AISTNSEGAQENHDDLMSVVVFK		No
10000183066	100136	O00566_546	O00566	O00566100136	SVSDAALL	546	S	V	S	D	A	A	L	L	12	466.267	3	-14	1398.8	35.986	30.7	0.0094	Abu-AALLAPEEIKEK	AALLAPEEIKEK		No
10000183067	100136	P22234_320	P22234	P22234100136	YEGDGIPT	320	Y	E	G	D	G	I	P	T	12	636.352	2	-39	1272.7	56.333	29.6	0.0059	Abu-GIPTVFVAVAGR	GIPTVFVAVAGR		No
10000183069	100136	Q5TH69_293	Q5TH69	Q5TH69100136	LESDSASP	293	L	E	S	D	S	A	S	P	11	385.519	3	-9.9	1156.56	14.7	28.2	0.0035	Abu-SASPGVSDHGR	SASPGVSDHGR		No
10000183070	100136	P18846_47	P18846	P18846100136	DSSDSIGS	47	D	S	S	D	S	I	G	S	14	378.202	4	-42	1512.81	25.108	28.1	0.0033	Abu-SIGSSQKAHGILAR	SIGSSQKAHGILAR		No
10000183074	100136	Q96ST2_348	Q96ST2	Q96ST2100136	MQNDSFHS	348	M	Q	N	D	S	F	H	S	10	435.181	3	-16	1305.54	17.71	26.9	0.0022	Abu-SFHSDSHMDR	SFHSDSHMDR		No
10000183076	100136	O43164_87	O43164	O43164100136	DQVDSSLP	87	D	Q	V	D	S	S	L	P	11	659.835	2	-21	1319.67	42.822	29.6	0.0073	Abu-SSLPSEPIFEK	SSLPSEPIFEK		No
10000183079	100136	Q9UNS1_580	Q9UNS1	Q9UNS1100136	LSMDSVVP	580	L	S	M	D	S	V	V	P	17	972.448	2	-42	1944.9	49.668	29.4	0.0068	Abu-SVVPFDAASEVPVEEQR	SVVPFDAASEVPVEEQR		No
10000183084	100136	Q9NT62_105	Q9NT62	Q9NT62100136	DDGDGGWV	105	D	D	G	D	G	G	W	V	31	706.733	5	-44	3533.67	67.096	29.7	0.0089	Abu-GGWVDTYHNTGITGITEAVKEITLENKDNIR	GGWVDTYHNTGITGITEAVKEITLENKDNIR		No
10000183085	100136	O94966_620	O94966	O94966100136	VDSDGRPD	620	V	D	S	D	G	R	P	D	14	576.278	3	-18	1728.83	40.823	28.2	0.0047	Abu-GRPDEVVAEEAWQR	GRPDEVVAEEAWQR		No
10000183089	100136	O43683_396	O43683	O43683100136	TVTDSMFA	396	T	V	T	D	S	M	F	A	8	463.238	2	-13	926.477	34.385	25.2	0.0013	Abu-SMFAVASK	SMFAVASK		No
10000183090	100136	Q00653_11	Q00653	Q00653100136	PGLDGIIE	11	P	G	L	D	G	I	I	E	9	592.78	2	-25	1185.56	45.532	27.4	0.0036	Abu-GIIEYDDFK	GIIEYDDFK		No
10000183093	100136	Q15650_123	Q15650	Q15650100136	TEPDTTAE	123	T	E	P	D	T	T	A	E	13	502.601	3	-22	1507.8	41.741	29.2	0.0085	Abu-TTAEVKTPFDLAK	TTAEVKTPFDLAK		No
10000183094	100136	Q96SB3_552	Q96SB3	Q96SB3100136	VEVDGTSL	552	V	E	V	D	G	T	S	L	17	593.324	3	-12	1779.97	70.015	27.9	0.0049	Abu-GTSLVGVTQSFAASVLR	GTSLVGVTQSFAASVLR		No
10000183097	100136	Q02880_1471	Q02880	Q02880100136	NEEDSASV	1471	N	E	E	D	S	A	S	V	12	656.318	2	-49	1312.64	50.161	27.6	0.0045	Abu-SASVFSPSFGLK	SASVFSPSFGLK		No
10000183111	100136	Q96IZ0_132	Q96IZ0	Q96IZ0100136	EEPDGVPE	132	E	E	P	D	G	V	P	E	14	361.191	4	-23	1444.76	13.911	28.4	0.0084	Abu-GVPEKGKSSGPSAR	GVPEKGKSSGPSAR		No
10000183120	100136	O43747_690	O43747	O43747100136	FLLDGLSS	690	F	L	L	D	G	L	S	S	23	812.393	3	-49	2437.18	72.641	27.6	0.0069	Abu-GLSSQPLFNDIAAGIPSITAYSK	GLSSQPLFNDIAAGIPSITAYSK		No
10000183134	100136	P56962_202	P56962	P56962100136	EKIDSIAD	202	E	K	I	D	S	I	A	D	22	585.296	4	-17	2341.18	46.969	27.4	0.0074	Abu-SIADHVNSAAVNVEEGTKNLGK	SIADHVNSAAVNVEEGTKNLGK		No
10000183140	100136	O15013_1247	O15013	O15013100136	DQKDALPS	1247	D	Q	K	D	A	L	P	S	32	1053.79	3	-57	3161.36	67.924	23.4	0.0015	Abu-ALPSGGAGSSLSQGDPDAAIWLGDSLGSMTQK	ALPSGGAGSSLSQGDPDAAIWLGDSLGSMTQK		No
10000183141	100136	Q03701_918	Q03701	Q03701100136	VDEDGGTF	918	V	D	E	D	G	G	T	F	23	869.056	3	-17	2607.17	63.554	24.2	0.0021	Abu-GGTFMDVLDDESESVPELEVHSK	GGTFMDVLDDESESVPELEVHSK		No
10000183148	100136	Q6KC79_473	Q6KC79	Q6KC79100136	VELDALAE	473	V	E	L	D	A	L	A	E	16	493.267	4	-10	1973.07	48.833	24.9	0.003	Abu-ALAEIERIERESAIER	ALAEIERIERESAIER		No
10000183149	100136	Q92766_1174	Q92766	Q92766100136	VDLDSSGE	1174	V	D	L	D	S	S	G	E	10	570.263	2	-34	1140.53	31.852	26.2	0.0057	Abu-SSGEFASIEK	SSGEFASIEK		No
10000183150	100136	Q9Y2X7_633	Q9Y2X7	Q9Y2X7100136	ESLDGDLD	633	E	S	L	D	G	D	L	D	22	814.077	3	-27	2442.23	58.93	29.1	0.02	Abu-GDLDPGLPSTEDVILKTEQVTK	GDLDPGLPSTEDVILKTEQVTK		No
10000183151	100136	Q96F63_53	Q96F63	Q96F63100136	VALDSDTS	53	V	A	L	D	S	D	T	S	22	734.331	3	-38	2202.99	64.806	24.9	0.0033	Abu-SDTSGAENAAVSAMLHAVAASR	SDTSGAENAAVSAMLHAVAASR		No
10000183153	100136	O43491_96	O43491	O43491100136	VAKDGGDK	96	V	A	K	D	G	G	D	K	28	653.315	5	-30	3266.57	44.012	28.2	0.014	Abu-GGDKKEPTQAVVEEQVLDKEEPLPEEQR	GGDKKEPTQAVVEEQVLDKEEPLPEEQR		No
10000183159	100136	Q6PKG0_173	Q6PKG0	Q6PKG0100136	DFGDAINW	173	D	F	G	D	A	I	N	W	13	506.925	3	-31	1520.77	45.655	27.1	0.01	Abu-AINWPTPGEIAHK	AINWPTPGEIAHK		No
10000183161	100136	Q06587_32	Q06587	Q06587100136	AIMDGTEI	32	A	I	M	D	G	T	E	I	9	507.767	2	-31	1015.53	24.532	28.2	0.017	Abu-GTEIAVSPR	GTEIAVSPR		No
10000183163	100136	Q99459_392	Q99459	Q99459100136	HESDFSGV	392	H	E	S	D	F	S	G	V	8	488.753	2	-22	977.507	24.086	26.4	0.0087	Abu-FSGVTPQR	FSGVTPQR		No
10000183166	100136	Q9NRL2_500	Q9NRL2	Q9NRL2100136	QLTDADTK	500	Q	L	T	D	A	D	T	K	18	678.298	3	-38	2034.89	44.359	24.9	0.0048	Abu-ADTKDLTEALDEDADPTK	ADTKDLTEALDEDADPTK		No
10000183169	100136	Q96RS0_344	Q96RS0	Q96RS0100136	TSHDGHQQ	344	T	S	H	D	G	H	Q	Q	11	428.885	3	-11	1286.65	17.953	27.2	0.014	Abu-GHQQLSEVSSK	GHQQLSEVSSK		No
10000183173	100136	Q9Y2Z0_21	Q9Y2Z0	Q9Y2Z0100136	SFSDALID	21	S	F	S	D	A	L	I	D	16	920.955	2	-28	1841.91	66.108	26.6	0.012	Abu-ALIDEDPQAALEELTK	ALIDEDPQAALEELTK		No
10000183179	100136	Q8N9T8_313	Q8N9T8	Q8N9T8100136	EEPDSASV	313	E	E	P	D	S	A	S	V	9	365.205	3	1.4	1095.62	18.719	22.8	0.0027	Abu-SASVKTYPR	SASVKTYPR		No
10000183182	100136	Q9H714_111	Q9H714	Q9H714100136	DTTDSVGS	111	D	T	T	D	S	V	G	S	13	438.885	3	9.2	1316.65	13.505	25.6	0.0096	Abu-SVGSASPHGSSEK	SVGSASPHGSSEK		No
10000183188	100136	P27708_1139	P27708	P27708100136	IDVDAVAS	1139	I	D	V	D	A	V	A	S	39	974.717	4	-41	3898.87	66.273	26.1	0.015	Abu-AVASDGVVAAIAISEHVENAGVHSGDATLVTPPQDITAK	AVASDGVVAAIAISEHVENAGVHSGDATLVTPPQDITAK		No
10000183194	100136	Q6NXR4_5	Q6NXR4	Q6NXR4100136	MELDSALE	5	M	E	L	D	S	A	L	E	28	1017.78	3	-31	3053.34	63.301	26.3	0.018	Abu-SALEAPSQEDSNLSEELSHSAFGQAFSK	SALEAPSQEDSNLSEELSHSAFGQAFSK		No
10000183201	100136	Q9C0J8_1184	Q9C0J8	Q9C0J8100136	DSWDGNRE	1184	D	S	W	D	G	N	R	E	13	394.442	4	-5.6	1577.77	17.391	22.4	0.004	Abu-GNREPGPGHEHFR	GNREPGPGHEHFR		No
10000183204	100136	P22102_206	P22102	P22102100136	CFTDGKTV	206	C	F	T	D	G	K	T	V	15	430.236	4	4.1	1720.95	17.654	24.1	0.0092	Abu-GKTVAPMPPAQDHKR	GKTVAPMPPAQDHKR		No
10000183209	100136	Q8TF05_445	Q8TF05	Q8TF05100136	TSQDSALL	445	T	S	Q	D	S	A	L	L	16	704.327	3	-32	2112.98	71.214	24.2	0.012	Abu-SALLDQELYNSFHFWR	SALLDQELYNSFHFWR		No
10000183210	100136	Q9UBN7_1089	Q9UBN7	Q9UBN7100136	DMADSMLM	1089	D	M	A	D	S	M	L	M	8	497.738	2	-12	995.477	26.932	24.9	0.017	Abu-SMLMQGSR	SMLMQGSR		No
10000183213	100136	Q8NDV7_1543	Q8NDV7	Q8NDV7100136	TTVDSISV	1543	T	T	V	D	S	I	S	V	23	620.049	4	-26	2480.2	39.462	23.4	0.0094	Abu-SISVNTSLDQNSSKHGAISSGFR	SISVNTSLDQNSSKHGAISSGFR		No
10000183215	100136	Q86VM9_362	Q86VM9	Q86VM9100136	DVRDTVLE	362	D	V	R	D	T	V	L	E	17	1110.98	2	-39	2221.95	58.434	22.9	0.0078	Abu-TVLEPYADPYYDYEIER	TVLEPYADPYYDYEIER		No
10000183221	100136	Q96N21_381	Q96N21	Q96N21100136	LLTDAVPL	381	L	L	T	D	A	V	P	L	22	784.746	3	-30	2354.24	63.751	22.2	0.0072	Abu-AVPLPGSQVFLQPLSSTPVSSR	AVPLPGSQVFLQPLSSTPVSSR		No
10000183222	100136	Q02750_283	Q02750	Q02750100136	VEGDAAET	283	V	E	G	D	A	A	E	T	9	360.529	3	-20	1081.59	16.911	23.8	0.014	Abu-AAETPPRPR	AAETPPRPR		No
10000183225	100136	O94913_1289	O94913	O94913100136	SQTDSATT	1289	S	Q	T	D	S	A	T	T	39	1111.73	4	-32	4446.91	63.232	22.1	0.0078	Abu-SATTQVSEVTAQPPPEEEEDQNEDQDVPDLTNFTVEELK	SATTQVSEVTAQPPPEEEEDQNEDQDVPDLTNFTVEELK		No
10000183233	200136	P60709_158	P60709	P60709200136	DSGDGVTH	158	D	S	G	D	G	V	T	H	20	573.845	4	47	2295.38	38.551	34.2	8.9e-05	Abu-GVTHTVPIYEGYALPHAILR	GVTHTVPIYEGYALPHAILR	yes	No	TRUE
10000183234	200136	P60709_52	P60709	P60709200136	GQKDSYVG	52	G	Q	K	D	S	Y	V	G	11	442.218	3	-7.8	1326.65	27.688	32	0.00039	Abu-SYVGDEAQSKR	SYVGDEAQSKR	yes	No	TRUE
10000183236	200136	P60709_245	P60709	P60709200136	ELPDGQVI	245	E	L	P	D	G	Q	V	I	10	586.337	2	21	1172.67	32.748	35	0.0057	Abu-GQVITIGNER	GQVITIGNER	yes	No	TRUE
10000183285	200136	P08670_86	P08670	P08670200136	DSVDFSLA	86	D	S	V	D	F	S	L	A	15	604.67	3	37	1814.01	41.383	39.3	1e-05	Abu-FSLADAINTEFKNTR	FSLADAINTEFKNTR		No	TRUE
10000183286	200136	P08670_332	P08670	P08670200136	CEVDALKG	332	C	E	V	D	A	L	K	G	11	434.908	3	5.3	1304.72	28.909	37.1	0.0013	Abu-ALKGTNESLER	ALKGTNESLER		No	TRUE
10000183288	200136	P08670_91	P08670	P08670200136	SLADAINT	91	S	L	A	D	A	I	N	T	10	426.902	3	8.0	1280.7	30.482	26.6	0.015	Abu-AINTEFKNTR	AINTEFKNTR		No	TRUE
10000183292	200136	Q99733_9	Q99733	Q99733200136	SFSDGVPS	9	S	F	S	D	G	V	P	S	18	630.337	3	38	1891.01	30.157	31.8	7.4e-05	Abu-GVPSDSVEAAKNASNTEK	GVPSDSVEAAKNASNTEK		No
10000183317	200136	Q14151_262	Q14151	Q14151200136	DLFDSAHP	262	D	L	F	D	S	A	H	P	23	613.804	4	30	2455.22	31.537	40.6	1.3e-07	Abu-SAHPEEGDLDLASESTAHAQSSK	SAHPEEGDLDLASESTAHAQSSK	yes	No
10000183325	200136	P33991_133	P33991	P33991200136	LQSDGAAA	133	L	Q	S	D	G	A	A	A	17	586.986	3	33	1760.96	35.482	42.5	1.2e-06	Abu-GAAAEDIVASEQSLGQK	GAAAEDIVASEQSLGQK		No
10000183329	200136	Q13263_686	Q13263	Q13263200136	LSLDGADS	686	L	S	L	D	G	A	D	S	10	495.274	2	15	990.549	27.366	35.5	0.0076	Abu-GADSTGVVAK	GADSTGVVAK		No
10000183330	200136	P09496_77	P09496	P09496200136	DAVDGVMN	77	D	A	V	D	G	V	M	N	26	979.491	3	53	2938.47	37.408	40.9	3.9e-06	Abu-GVMNGEYYQESNGPTDSYAAISQVDR	GVMNGEYYQESNGPTDSYAAISQVDR		No
10000183334	200136	Q96HA7_499	Q96HA7	Q96HA7200136	DDTDGLTP	499	D	D	T	D	G	L	T	P	18	702.719	3	46	2108.16	36.312	42.7	6e-06	Abu-GLTPQLEEDEELQGHLGR	GLTPQLEEDEELQGHLGR		No
10000183336	200136	P55209_58	P55209	P55209200136	ERLDGLVE	58	E	R	L	D	G	L	V	E	15	859.007	2	52	1718.01	39.781	45.9	6.8e-06	Abu-GLVETPTGYIESLPR	GLVETPTGYIESLPR		No
10000183345	200136	O15042_738	O15042	O15042200136	DDLDGVPL	738	D	D	L	D	G	V	P	L	11	608.827	2	33	1217.65	31.616	36.5	6e-06	Abu-GVPLDATEDSK	GVPLDATEDSK		No
10000183347	200136	P18583_154	P18583	P18583200136	LESDSFLK	154	L	E	S	D	S	F	L	K	19	731.43	3	53	2194.29	40.843	38.2	3.1e-05	Abu-SFLKFDSEPSAVALELPTR	SFLKFDSEPSAVALELPTR		No
10000183360	200136	P36915_344	P36915	P36915200136	QQTDSAME	344	Q	Q	T	D	S	A	M	E	12	694.86	2	47	1389.72	29.449	38.2	0.00019	Abu-SAMEPTGPTQER	SAMEPTGPTQER		No
10000183362	200136	Q14980_1830	Q14980	Q14980200136	EEPDSANS	1830	E	E	P	D	S	A	N	S	10	602.806	2	37	1205.61	30.995	38	0.00025	Abu-SANSSFYSTR	SANSSFYSTR		No
10000183363	200136	Q92598_548	Q92598	Q92598200136	VQTDAQQT	548	V	Q	T	D	A	Q	Q	T	29	806.939	4	55	3227.76	32.198	33	3.7e-05	Abu-AQQTSQSPPSPELTSEENKIPDADKANEK	AQQTSQSPPSPELTSEENKIPDADKANEK		No
10000183369	200136	O95391_8	O95391	O95391200136	TVVDAVNA	8	T	V	V	D	A	V	N	A	11	550.32	2	20	1100.64	30.079	39	0.00089	Abu-AVNAAPLSGSK	AVNAAPLSGSK		No
10000183372	200136	P17028_10	P17028	P17028200136	VEEDSILI	10	V	E	E	D	S	I	L	I	16	651.059	3	26	1953.18	40.685	32.2	0.00011	Abu-SILIIPTPDEEEKILR	SILIIPTPDEEEKILR		No
10000183385	200136	P35579_1154	P35579	P35579200136	DTLDSTAA	1154	D	T	L	D	S	T	A	A	9	544.804	2	30	1089.61	28.202	40.2	0.015	Abu-STAAQQELR	STAAQQELR		No
10000183387	200136	Q8N1G4_526	Q8N1G4	Q8N1G4200136	TEADAVSG	526	T	E	A	D	A	V	S	G	29	1006.6	3	62	3019.79	37.864	30.5	0.0003	Abu-AVSGQLPDPTTNPSAGKDGPSLLVVEQVR	AVSGQLPDPTTNPSAGKDGPSLLVVEQVR		No
10000183388	200136	O15027_342	O15027	O15027200136	VHPDSVSS	342	V	H	P	D	S	V	S	S	9	522.756	2	8.7	1045.51	27.967	36.5	0.0044	Abu-SVSSSYSSR	SVSSSYSSR		No
10000183389	200136	Q63HN8_274	Q63HN8	Q63HN8200136	MAVDAVAE	274	M	A	V	D	A	V	A	E	10	527.81	2	22	1055.62	29.057	35.8	0.0034	Abu-AVAEPANAVK	AVAEPANAVK		No
10000183390	200136	Q9UQ35_1150	Q9UQ35	Q9UQ35200136	PTVDSNSL	1150	P	T	V	D	S	N	S	L	9	523.798	2	28	1047.6	30.908	33.8	0.0017	Abu-SNSLLGQSR	SNSLLGQSR		No
10000183395	200136	Q5T4S7_2904	Q5T4S7	Q5T4S7200136	SAVDSVAG	2904	S	A	V	D	S	V	A	G	11	390.877	3	25	1172.63	26.997	36.9	0.011	Abu-SVAGEHSVSGR	SVAGEHSVSGR		No
10000183399	200136	Q92917_38	Q92917	Q92917200136	DSGDGAGP	38	D	S	G	D	G	A	G	P	18	501.283	4	43	2005.13	36.391	26.7	0.00032	Abu-GAGPSPEEKDFLKTVEGR	GAGPSPEEKDFLKTVEGR		No
10000183404	200136	P26368_129	P26368	P26368200136	MTPDGLAV	129	M	T	P	D	G	L	A	V	18	948.062	2	39	1896.12	37.495	31.4	0.0043	Abu-GLAVTPTPVPVVGSQMTR	GLAVTPTPVPVVGSQMTR		No
10000183406	200136	Q13435_777	Q13435	Q13435200136	EAMDGSET	777	E	A	M	D	G	S	E	T	15	596.346	3	30	1789.04	37.574	28.2	0.0015	Abu-GSETPQLFTVLPEKR	GSETPQLFTVLPEKR		No
10000183407	200136	P51572_165	P51572	P51572200136	AAVDGGKL	165	A	A	V	D	G	G	K	L	18	511.287	4	36	2045.15	33.457	30.1	0.0036	Abu-GGKLDVGNAEVKLEEENR	GGKLDVGNAEVKLEEENR		No
10000183416	200136	P45974_783	P45974	P45974200136	SAADSISE	783	S	A	A	D	S	I	S	E	11	592.852	2	37	1185.7	32.905	28.4	0.0042	Abu-SISESVPVGPK	SISESVPVGPK		No
10000183417	200136	P16989_162	P16989	P16989200136	TGPDGVPV	162	T	G	P	D	G	V	P	V	8	443.251	2	18	886.502	28.665	29.9	0.0098	Abu-GVPVEGSR	GVPVEGSR		No
10000183425	200136	P26599_3	P26599	P26599200136	--MDGIVP	3	-	-	M	D	G	I	V	P	12	437.602	3	9.6	1312.81	35.255	24	0.0018	Abu-GIVPDIAVGTKR	GIVPDIAVGTKR		No
10000183426	200136	Q9BU89_9	Q9BU89	Q9BU89200136	QEVDAIGQ	9	Q	E	V	D	A	I	G	Q	16	607.351	3	0.64	1822.05	34.643	23.9	0.0023	Abu-AIGQTLVDPKQPLQAR	AIGQTLVDPKQPLQAR		No
10000183429	200136	Q9BY77_235	Q9BY77	Q9BY77200136	VQNDAYTA	235	V	Q	N	D	A	Y	T	A	12	666.376	2	10	1332.75	35.613	25.3	0.0082	Abu-AYTAPALPSSIR	AYTAPALPSSIR		No
10000183439	100137	P60709_158	P60709	P60709100137	DSGDGVTH	158	D	S	G	D	G	V	T	H	20	764.754	3	-0.68	2294.26	47.509	45.6	1.3e-07	Abu-GVTHTVPIYEGYALPHAILR	GVTHTVPIYEGYALPHAILR	yes	No	TRUE
10000183446	100137	P60709_52	P60709	P60709100137	GQKDSYVG	52	G	Q	K	D	S	Y	V	G	11	662.828	2	-0.19	1325.66	12.506	41.4	1.4e-05	Abu-SYVGDEAQSKR	SYVGDEAQSKR	yes	No	TRUE
10000183450	100137	P60709_245	P60709	P60709100137	ELPDGQVI	245	E	L	P	D	G	Q	V	I	10	586.325	2	-0.20	1172.65	35.059	35.4	0.00047	Abu-GQVITIGNER	GQVITIGNER	yes	No	TRUE
10000183579	100137	Q562R1_53	Q562R1	Q562R1100137	GQKDCYVG	53	G	Q	K	D	C	Y	V	G	11	670.824	2	11	1341.65	12.656	24.1	0.00015	Abu-CYVGDEAQSKR	CYVGDEAQSKR		No
10000183623	100137	O43719_81	O43719	O43719100137	FSNDGASS	81	F	S	N	D	G	A	S	S	15	793.382	2	0.27	1586.76	19.099	41	2.1e-06	Abu-GASSSTANVEDVHAR	GASSSTANVEDVHAR		No
10000183628	100137	O43719_34	O43719	O43719100137	TQTDAGGE	34	T	Q	T	D	A	G	G	E	24	911.427	3	-0.46	2734.28	54.947	30	0.00089	Abu-AGGEPDSLGQQPTDTPYEWDLDKK	AGGEPDSLGQQPTDTPYEWDLDKK		No
10000183630	100137	O43719_349	O43719	O43719100137	QAWDGTTD	349	Q	A	W	D	G	T	T	D	12	735.844	2	7.4	1471.69	24.355	22.5	0.016	Abu-GTTDYQVEETSR	GTTDYQVEETSR		No
10000183636	100137	P11142_226	P11142	P11142100137	TAGDTHLG	226	T	A	G	D	T	H	L	G	11	673.312	2	1.9	1346.62	18.577	23.6	0.00016	Abu-THLGGEDFDNR	THLGGEDFDNR	yes	No
10000183654	100137	P43243_764	P43243	P43243100137	ENADGQSD	764	E	N	A	D	G	Q	S	D	17	1065.47	2	2.2	2130.94	22.461	43.8	2.6e-08	Abu-GQSDENKDDYTIPDEYR	GQSDENKDDYTIPDEYR		No
10000183658	100137	P43243_681	P43243	P43243100137	DETDLANL	681	D	E	T	D	L	A	N	L	13	686.875	2	-0.98	1373.75	33.980	38.9	1.3e-05	Abu-LANLGDVASDGKK	LANLGDVASDGKK		No
10000183666	100137	P31943_95	P31943	P31943100137	VEMDWVLK	95	V	E	M	D	W	V	L	K	20	766.048	3	-7.7	2298.14	44.834	36.9	1.4e-05	Abu-WVLKHTGPNSPDTANDGFVR	WVLKHTGPNSPDTANDGFVR		No
10000183670	100137	P31943_341	P31943	P31943100137	THEDAVAA	341	T	H	E	D	A	V	A	A	15	581.63	3	-2.1	1744.89	15.265	25.9	0.0031	Abu-AVAAMSKDKANMQHR	AVAAMSKDKANMQHR		No
10000183701	100137	Q14157_412	Q14157	Q14157100137	NPSDSAVH	412	N	P	S	D	S	A	V	H	10	607.84	2	7.2	1215.68	19.999	27.4	0.00086	Abu-SAVHSPFTKR	SAVHSPFTKR		No
10000183707	100137	P21333_2537	P21333	P21333100137	VFVDSLTK	2537	V	F	V	D	S	L	T	K	23	769.052	3	7.9	2307.16	24.877	29.4	0.00017	Abu-SLTKATC(Carboxymethyl)APQHGAPGPGPADASK	SLTKATCAPQHGAPGPGPADASK		No
10000183710	100137	P21333_1049	P21333	P21333100137	VTYDGVPV	1049	V	T	Y	D	G	V	P	V	23	597.597	4	-2.1	2390.39	46.810	28.6	0.0016	Abu-GVPVPGSPFPLEAVAPTKPSKVK	GVPVPGSPFPLEAVAPTKPSKVK		No
10000183715	100137	P21333_1505	P21333	P21333100137	DNADGTQT	1505	D	N	A	D	G	T	Q	T	11	653.841	2	0.26	1307.68	28.479	22	0.01	Abu-GTQTVNYVPSR	GTQTVNYVPSR		No
10000183723	100137	P19338_637	P19338	P19338100137	GEIDGNKV	637	G	E	I	D	G	N	K	V	12	721.41	2	-2.4	1442.82	34.908	28	0.0013	Abu-GNKVTLDWAKPK	GNKVTLDWAKPK		No
10000183734	100137	Q9UQ35_1150	Q9UQ35	Q9UQ35100137	PTVDSNSL	1150	P	T	V	D	S	N	S	L	9	523.78	2	-5.9	1047.56	23.111	22.9	0.014	Abu-SNSLLGQSR	SNSLLGQSR		No
10000183741	100137	P08670_86	P08670	P08670100137	DSVDFSLA	86	D	S	V	D	F	S	L	A	15	906.477	2	10	1812.95	51.784	38.6	4.1e-06	Abu-FSLADAINTEFKNTR	FSLADAINTEFKNTR		No	TRUE
10000183743	100137	P08670_258	P08670	P08670100137	VQIDVDVS	258	V	Q	I	D	V	D	V	S	13	735.422	2	2.8	1470.84	49.617	31.8	0.00019	Abu-VDVSKPDLTAALR	VDVSKPDLTAALR		No	TRUE
10000183744	100137	P08670_332	P08670	P08670100137	CEVDALKG	332	C	E	V	D	A	L	K	G	11	651.853	2	-1.8	1303.71	15.025	37	0.0002	Abu-ALKGTNESLER	ALKGTNESLER		No	TRUE
10000183746	100137	P08670_430	P08670	P08670100137	TNLDSLPL	430	T	N	L	D	S	L	P	L	11	669.38	2	-0.64	1338.76	33.783	25.1	0.00086	Abu-SLPLVDTHSKR	SLPLVDTHSKR		No	TRUE
10000183747	100137	P08670_260	P08670	P08670100137	IDVDVSKP	260	I	D	V	D	V	S	K	P	11	628.37	2	-2.5	1256.74	40.749	32.1	0.0012	Abu-VSKPDLTAALR	VSKPDLTAALR		No	TRUE
10000183749	100137	P08670_91	P08670	P08670100137	SLADAINT	91	S	L	A	D	A	I	N	T	10	639.842	2	-2.2	1279.68	26.391	27.8	0.0016	Abu-AINTEFKNTR	AINTEFKNTR		No	TRUE
10000183752	100137	Q15424_263	Q15424	Q15424100137	DLFDSAHP	263	D	L	F	D	S	A	H	P	23	1226.57	2	0.27	2453.13	33.026	42.8	2.6e-09	Abu-SAHPEEGDLDLASESTAHAQSSK	SAHPEEGDLDLASESTAHAQSSK	yes	No
10000183755	100137	Q15424_147	Q15424	Q15424100137	SVADCVED	147	S	V	A	D	C	V	E	D	18	1077.44	2	-2.2	2154.88	46.487	26.2	0.00017	Abu-C(Carboxymethyl)VEDDDADNLQESLSDSR	CVEDDDADNLQESLSDSR		No
10000183760	100137	Q14151_184	Q14151	Q14151100137	HAVDGEGF	184	H	A	V	D	G	E	G	F	16	928.977	2	4.1	1857.95	54.064	47.1	1.5e-07	Abu-GEGFKNTLETSSLNFK	GEGFKNTLETSSLNFK		No
10000183779	100137	P67809_113	P67809	P67809100137	VEFDVVEG	113	V	E	F	D	V	V	E	G	25	808.09	3	-0.62	2424.27	36.118	42.6	5.3e-06	Abu-VVEGEKGAEAANVTGPGGVPVQGSK	VVEGEKGAEAANVTGPGGVPVQGSK		No
10000183783	100137	P67809_84	P67809	P67809100137	TKEDVFVH	84	T	K	E	D	V	F	V	H	10	628.379	2	-0.95	1256.76	22.965	21.9	0.0065	Abu-VFVHQTAIKK	VFVHQTAIKK	yes	No
10000183786	100137	P16989_145	P16989	P16989100137	VEFDVVEG	145	V	E	F	D	V	V	E	G	25	837.09	3	0.78	2511.27	40.318	37.4	3e-05	Abu-VVEGEKGAEAANVTGPDGVPVEGSR	VVEGEKGAEAANVTGPDGVPVEGSR		No
10000183787	100137	P16989_270	P16989	P16989100137	EMKDGVPE	270	E	M	K	D	G	V	P	E	14	765.414	2	1.3	1530.83	34.555	38.1	7.5e-05	Abu-GVPEGAQLQGPVHR	GVPEGAQLQGPVHR		No
10000183789	100137	P16989_162	P16989	P16989100137	TGPDGVPV	162	T	G	P	D	G	V	P	V	8	443.243	2	0.076	886.486	16.410	30.1	0.0034	Abu-GVPVEGSR	GVPVEGSR		No
10000183791	100137	Q13428_1243	Q13428	Q13428100137	DDPDGKQE	1243	D	D	P	D	G	K	Q	E	17	927.5	2	1.9	1855	24.691	42.7	1.5e-06	Abu-GKQEAKPQQAAGMLSPK	GKQEAKPQQAAGMLSPK		No
10000183792	100137	Q13428_1102	Q13428	Q13428100137	SGVDSAVG	1102	S	G	V	D	S	A	V	G	19	958.016	2	6.3	1916.03	37.853	38.8	2e-06	Abu-SAVGTLPATSPQSTSVQAK	SAVGTLPATSPQSTSVQAK		No
10000183800	100137	P35637_356	P35637	P35637100137	DWFDGKEF	356	D	W	F	D	G	K	E	F	16	911.993	2	-1.4	1823.99	46.753	51.8	5.6e-08	Abu-GKEFSGNPIKVSFATR	GKEFSGNPIKVSFATR		No
10000183813	100137	Q9BU89_9	Q9BU89	Q9BU89100137	QEVDAIGQ	9	Q	E	V	D	A	I	G	Q	16	910.522	2	-1.1	1821.04	48.264	30.1	0.00057	Abu-AIGQTLVDPKQPLQAR	AIGQTLVDPKQPLQAR		No
10000183831	100137	P62937_10	P62937	P62937100137	VFFDIAVD	10	V	F	F	D	I	A	V	D	10	556.309	2	0.29	1112.62	40.495	24.4	0.016	Abu-IAVDGEPLGR	IAVDGEPLGR		No
10000183832	100137	O15042_738	O15042	O15042100137	DDLDGVPL	738	D	D	L	D	G	V	P	L	18	1037.06	2	10.0	2074.11	43.090	37.8	1.6e-07	Abu-GVPLDATEDSKKNEPIFK	GVPLDATEDSKKNEPIFK		No
10000183834	100137	O15042_713	O15042	O15042100137	EDVDGIPI	713	E	D	V	D	G	I	P	I	18	967.54	2	13	1935.08	76.592	40.6	5.8e-06	Abu-GIPIDATPIDDLDGVPIK	GIPIDATPIDDLDGVPIK		No
10000183836	100137	O15042_726	O15042	O15042100137	DDLDGVPI	726	D	D	L	D	G	V	P	I	23	828.751	3	1.4	2486.25	67.897	27	0.0031	Abu-GVPIKSLDDDLDGVPLDATEDSK	GVPIKSLDDDLDGVPLDATEDSK		No
10000183839	100137	P49792_2491	P49792	P49792100137	DVADATSE	2491	D	V	A	D	A	T	S	E	16	869.424	2	1.6	1738.85	18.936	50.4	4.3e-07	Abu-ATSEVEVSSTSETTPK	ATSEVEVSSTSETTPK		No
10000183840	100137	P49792_2237	P49792	P49792100137	ALDDSVSS	2237	A	L	D	D	S	V	S	S	19	984.525	2	-4.6	1969.05	31.223	41.2	1.4e-06	Abu-SVSSSSVHASPLASSPVRK	SVSSSSVHASPLASSPVRK	yes	No
10000183842	100137	P49792_1158	P49792	P49792100137	HETDGGSA	1158	H	E	T	D	G	G	S	A	28	757.615	4	1.2	3030.46	63.881	36.9	0.00012	Abu-GGSAHGDDDDDGPHFEPVVPLPDKIEVK	GGSAHGDDDDDGPHFEPVVPLPDKIEVK		No
10000183864	100137	P26368_129	P26368	P26368100137	MTPDGLAV	129	M	T	P	D	G	L	A	V	18	948.025	2	0.97	1896.05	45.747	53.4	9.7e-08	Abu-GLAVTPTPVPVVGSQMTR	GLAVTPTPVPVVGSQMTR		No
10000183874	100137	Q6P2E9_486	Q6P2E9	Q6P2E9100137	EENDSLGA	486	E	E	N	D	S	L	G	A	22	1049.54	2	3.7	2099.07	58.370	43.8	5.2e-08	Abu-SLGADGTHGAGAMESAAGVLIK	SLGADGTHGAGAMESAAGVLIK		No
10000183875	100137	Q6P2E9_663	Q6P2E9	Q6P2E9100137	LQLDGSLT	663	L	Q	L	D	G	S	L	T	16	833.904	2	-3.3	1667.81	20.969	40.3	1.8e-06	Abu-GSLTM(Oxidation)SSSGSLQASPR	GSLTMSSSGSLQASPR		No
10000183881	100137	P14317_27	P14317	P14317100137	TDPDFVND	27	T	D	P	D	F	V	N	D	11	725.373	2	3.8	1450.75	29.502	35.9	0.00019	Abu-FVNDISEKEQR	FVNDISEKEQR		No
10000183910	100137	Q9H4A3_1070	Q9H4A3	Q9H4A3100137	SSVDSAHS	1070	S	S	V	D	S	A	H	S	23	1167	2	-2.0	2334.01	24.383	56.3	7.8e-12	Abu-SAHSDVASGMSDGNENVPSSSGR	SAHSDVASGMSDGNENVPSSSGR		No
10000183918	100137	Q13263_686	Q13263	Q13263100137	LSLDGADS	686	L	S	L	D	G	A	D	S	10	495.266	2	-1.3	990.532	13.745	32.4	0.0038	Abu-GADSTGVVAK	GADSTGVVAK		No
10000183924	100137	P68363_48	P68363	P68363100137	GGDDSFNT	48	G	G	D	D	S	F	N	T	17	492.5	4	0.20	1970	38.820	22.6	0.011	Abu-SFNTFFSETGAGKHVPR	SFNTFFSETGAGKHVPR	yes	No	TRUE
10000183925	100137	P68363_34	P68363	P68363100137	IQPDGQMP	34	I	Q	P	D	G	Q	M	P	31	669.119	5	4.6	3345.59	56.233	30.1	0.012	Abu-GQM(Oxidation)PSDKTIGGGDDSFNTFFSETGAGKHVPR	GQMPSDKTIGGGDDSFNTFFSETGAGKHVPR	yes	No	TRUE
10000184038	100137	Q9Y5A9_368	Q9Y5A9	Q9Y5A9100137	NGVDGNGV	368	N	G	V	D	G	N	G	V	24	1203.09	2	0.15	2406.18	28.565	37.2	1.3e-06	Abu-GNGVGQSQAGSGSTPSEPHPVLEK	GNGVGQSQAGSGSTPSEPHPVLEK		No
10000184041	100137	Q9Y5A9_167	Q9Y5A9	Q9Y5A9100137	AMIDGQSA	167	A	M	I	D	G	Q	S	A	39	1012.26	4	1.2	4049.06	60.028	38.7	0.00069	Abu-GQSAFANETLNKAPGMNTIDQGMAALKLGSTEVASNVPK	GQSAFANETLNKAPGMNTIDQGMAALKLGSTEVASNVPK		No
10000184046	100137	O75533_35	O75533	O75533100137	VGLDSTGY	35	V	G	L	D	S	T	G	Y	16	941.91	2	2.0	1883.82	23.439	29.2	8.1e-06	Abu-STGYYDQEIYGGSDSR	STGYYDQEIYGGSDSR		No
10000184069	100137	Q71RC2_574	Q71RC2	Q71RC2100137	VQKDGLNQ	574	V	Q	K	D	G	L	N	Q	19	689.381	3	2.6	2068.14	44.735	27.8	0.00028	Abu-GLNQTTIPVSPPSTTKPSR	GLNQTTIPVSPPSTTKPSR		No
10000184072	100137	P06454_4	P06454	P06454100137	-MSDAAVD	4	-	M	S	D	A	A	V	D	12	654.338	2	0.017	1308.68	25.175	47.4	1.2e-05	Abu-AAVDTSSEITTK	AAVDTSSEITTK		No
10000184074	100137	P06454_8	P06454	P06454100137	AAVDTSSE	8	A	A	V	D	T	S	S	E	13	782.926	2	1.2	1565.85	20.503	32.4	0.0015	Abu-TSSEITTKDLKEK	TSSEITTKDLKEK		No
10000184080	100137	P22626_77	P22626	P22626100137	AEVDAAMA	77	A	E	V	D	A	A	M	A	13	719.372	2	-0.43	1438.74	19.266	32.7	0.002	Abu-AAMAARPHSIDGR	AAMAARPHSIDGR		No
10000184087	100137	P09651_70	P09651	P09651100137	EEVDAAMN	70	E	E	V	D	A	A	M	N	13	503.267	3	-2.6	1509.8	10.250	24.3	0.0086	Abu-AAMNARPHKVDGR	AAMNARPHKVDGR		No
10000184106	100137	P51572_165	P51572	P51572100137	AAVDGGKL	165	A	A	V	D	G	G	K	L	18	1021.52	2	-7.4	2043.04	41.662	51.2	1.9e-08	Abu-GGKLDVGNAEVKLEEENR	GGKLDVGNAEVKLEEENR		No
10000184136	100137	P26599_3	P26599	P26599100137	--MDGIVP	3	-	-	M	D	G	I	V	P	12	655.894	2	1.6	1311.79	48.309	30.6	0.00011	Abu-GIVPDIAVGTKR	GIVPDIAVGTKR		No
10000184140	100137	Q13813_1479	Q13813	Q13813100137	DSLDSVEA	1479	D	S	L	D	S	V	E	A	14	872.469	2	1.7	1744.94	42.343	36.1	0.0001	Abu-SVEALIKKHEDFDK	SVEALIKKHEDFDK		No	TRUE
10000184142	100137	Q13813_501	Q13813	Q13813100137	DSLDSVEA	501	D	S	L	D	S	V	E	A	8	486.81	2	4.0	973.62	35.111	21.4	0.015	Abu-SVEALLKK	SVEALLKK		No	TRUE
10000184156	100137	Q92917_38	Q92917	Q92917100137	DSGDGAGP	38	D	S	G	D	G	A	G	P	18	1001.52	2	2.0	2003.04	49.162	42.6	9.7e-08	Abu-GAGPSPEEKDFLKTVEGR	GAGPSPEEKDFLKTVEGR		No
10000184160	100137	P33991_133	P33991	P33991100137	LQSDGAAA	133	L	Q	S	D	G	A	A	A	17	879.948	2	1.6	1759.9	41.448	48	9.1e-07	Abu-GAAAEDIVASEQSLGQK	GAAAEDIVASEQSLGQK		No
10000184161	100137	P33991_568	P33991	P33991100137	VLSDNGIC	568	V	L	S	D	N	G	I	C	17	1030.44	2	-7.5	2060.88	53.038	25.9	2.5e-05	Abu-NGICCIDEFDKMNESTR	NGICCIDEFDKMNESTR		No
10000184171	100137	Q2NL82_333	Q2NL82	Q2NL82100137	CATDAVDD	333	C	A	T	D	A	V	D	D	14	831.928	2	2.4	1663.86	71.794	40.8	1.7e-05	Abu-AVDDMEEGLKVLMK	AVDDMEEGLKVLMK		No
10000184175	100137	Q7Z6Z7_3665	Q7Z6Z7	Q7Z6Z7100137	LSPDGLPE	3665	L	S	P	D	G	L	P	E	11	656.842	2	1.7	1313.68	25.179	28.7	1.7e-05	Abu-GLPEEQPQTTK	GLPEEQPQTTK		No
10000184176	100137	Q7Z6Z7_2931	Q7Z6Z7	Q7Z6Z7100137	STRDSAVA	2931	S	T	R	D	S	A	V	A	11	559.79	2	-6.5	1119.58	23.096	36.9	5.5e-05	Abu-SAVAISGADSR	SAVAISGADSR		No
10000184178	100137	Q7Z6Z7_2360	Q7Z6Z7	Q7Z6Z7100137	LERDGGSG	2360	L	E	R	D	G	G	S	G	12	616.83	2	-5.4	1233.66	25.757	29.3	0.0031	Abu-GGSGNSTIIVSR	GGSGNSTIIVSR		No
10000184182	100137	P27816_9	P27816	P27816100137	SLADALTE	9	S	L	A	D	A	L	T	E	14	792.414	2	2.3	1584.83	44.947	29.7	0.00089	Abu-ALTEPSPDIEGEIK	ALTEPSPDIEGEIK		No
10000184188	100137	Q02447_531	Q02447	Q02447100137	NSIDSAGI	531	N	S	I	D	S	A	G	I	19	1017.01	2	2.7	2034.02	42.363	33.6	0.00018	Abu-SAGIQLHPGENADSPADIR	SAGIQLHPGENADSPADIR		No
10000184196	100137	P78559_1885	P78559	P78559100137	AEYDSVVA	1885	A	E	Y	D	S	V	V	A	23	1157.61	2	11	2315.22	76.683	45.7	1.7e-07	Abu-SVVAAVQEGAAELEGGPYSPLGK	SVVAAVQEGAAELEGGPYSPLGK		No
10000184205	100137	Q14257_204	Q14257	Q14257100137	KNGDGFVS	204	K	N	G	D	G	F	V	S	13	808.91	2	11	1617.82	66.147	39.4	9.5e-07	Abu-GFVSLEEFLGDYR	GFVSLEEFLGDYR		No
10000184211	100137	Q7Z2W4_492	Q7Z2W4	Q7Z2W4100137	LVNDSLSD	492	L	V	N	D	S	L	S	D	12	663.331	2	0.46	1326.66	32.746	27	3.8e-05	Abu-SLSDVTSTTSSR	SLSDVTSTTSSR		No
10000184212	100137	Q7Z2W4_434	Q7Z2W4	Q7Z2W4100137	NNADGVAT	434	N	N	A	D	G	V	A	T	10	553.298	2	3.6	1106.6	28.641	34.6	0.00016	Abu-GVATDITSTR	GVATDITSTR		No
10000184222	100137	Q8NFC6_1484	Q8NFC6	Q8NFC6100137	SEVDTSAG	1484	S	E	V	D	T	S	A	G	15	770.393	2	-5.6	1540.79	22.479	33.4	7e-06	Abu-TSAGSGSAPSVLHQR	TSAGSGSAPSVLHQR		No
10000184224	100137	Q8NFC6_2045	Q8NFC6	Q8NFC6100137	EECDGLMA	2045	E	E	C	D	G	L	M	A	25	840.422	3	-0.75	2521.26	31.552	30.9	0.00049	Abu-GLMATTASGDITNQNSLAGGKNQGK	GLMATTASGDITNQNSLAGGKNQGK		No
10000184233	100137	Q96PK2_2229	Q96PK2	Q96PK2100137	DTTDGYMG	2229	D	T	T	D	G	Y	M	G	14	817.91	2	-4.9	1635.82	34.177	39.2	7.1e-06	Abu-GYMGVNQAPEKLDK	GYMGVNQAPEKLDK	yes	No
10000184241	100137	Q13151_63	Q13151	Q13151100137	EEADAAMA	63	E	E	A	D	A	A	M	A	19	1012.03	2	4.0	2024.05	34.445	38.4	3.1e-06	Abu-AAMAASPHAVDGNTVELKR	AAMAASPHAVDGNTVELKR		No
10000184249	100137	Q6JBY9_273	Q6JBY9	Q6JBY9100137	EEVDGQHP	273	E	E	V	D	G	Q	H	P	23	853.729	3	0.25	2561.19	.167	43.1	6.9e-06	Abu-GQHPAQEEVPESPQTSGPEAENR	GQHPAQEEVPESPQTSGPEAENR		No
10000184255	100137	P51991_116	P51991	P51991100137	SREDSVKP	116	S	R	E	D	S	V	K	P	12	675.416	2	-0.61	1350.83	16.750	31.6	0.00021	Abu-SVKPGAHLTVKK	SVKPGAHLTVKK		No
10000184260	100137	P51991_179	P51991	P51991100137	DDHDTVDK	179	D	D	H	D	T	V	D	K	9	557.842	2	-5.7	1115.68	26.692	26.4	0.0075	Abu-TVDKIVVQK	TVDKIVVQK		No
10000184263	100137	P11171_551	P11171	P11171100137	AAVDSADR	551	A	A	V	D	S	A	D	R	31	788.419	4	0.89	3153.67	41.126	37.6	0.00046	Abu-SADRSPRPTSAPAITQGQVAEGGVLDASAKK	SADRSPRPTSAPAITQGQVAEGGVLDASAKK		No	TRUE
10000184269	100137	Q9UKV3_69	Q9UKV3	Q9UKV3100137	VTLDGKPL	69	V	T	L	D	G	K	P	L	8	323.206	3	-2.3	969.617	21.902	21.3	0.009	Abu-GKPLQALR	GKPLQALR		No
10000184270	100137	O15027_838	O15027	O15027100137	SHSDSLAS	838	S	H	S	D	S	L	A	S	13	726.881	2	0.25	1453.76	19.017	43.4	1.1e-06	Abu-SLASQQSVASHPR	SLASQQSVASHPR		No
10000184272	100137	O15027_342	O15027	O15027100137	VHPDSVSS	342	V	H	P	D	S	V	S	S	9	522.751	2	-0.29	1045.5	9.361	18	0.02	Abu-SVSSSYSSR	SVSSSYSSR		No
10000184276	100137	P32519_146	P32519	P32519100137	VTLDGIPE	146	V	T	L	D	G	I	P	E	14	850.932	2	2.4	1701.86	47.931	40.9	1.1e-06	Abu-GIPEVMETQQVQEK	GIPEVMETQQVQEK		No
10000184291	100137	Q9Y5S9_7	Q9Y5S9	Q9Y5S9100137	DVLDLHEA	7	D	V	L	D	L	H	E	A	25	722.088	4	1.5	2888.35	39.544	42.7	0.00012	Abu-LHEAGGEDFAMDEDGDESIHKLKEK	LHEAGGEDFAMDEDGDESIHKLKEK		No
10000184292	100137	Q9Y5S9_56	Q9Y5S9	Q9Y5S9100137	EDYDSVEQ	56	E	D	Y	D	S	V	E	Q	13	749.842	2	-0.21	1499.68	19.040	35.1	0.00015	Abu-SVEQDGDEPGPQR	SVEQDGDEPGPQR		No
10000184297	100137	P36915_344	P36915	P36915100137	QQTDSAME	344	Q	Q	T	D	S	A	M	E	12	702.827	2	2.5	1405.65	22.365	41.5	2.1e-05	Abu-SAM(Oxidation)EPTGPTQER	SAMEPTGPTQER		No
10000184300	100137	Q9Y2I7_1608	Q9Y2I7	Q9Y2I7100137	DVFDGHLL	1608	D	V	F	D	G	H	L	L	14	792.424	2	1.4	1584.85	20.951	48.6	5.2e-07	Abu-GHLLGSTDSQVKEK	GHLLGSTDSQVKEK		No
10000184317	100137	Q7Z6E9_1268	Q7Z6E9	Q7Z6E9100137	TLVDYTST	1268	T	L	V	D	Y	T	S	T	13	692.845	2	9.6	1385.69	19.356	34.7	4.2e-06	Abu-YTSTSSTGGSPVR	YTSTSSTGGSPVR		No
10000184334	100137	Q13123_109	Q13123	Q13123100137	ERRDGVNK	109	E	R	R	D	G	V	N	K	19	1144.57	2	13	2289.14	50.776	36.5	4.4e-07	Abu-GVNKDYEETELISTTANYR	GVNKDYEETELISTTANYR		No
10000184336	100137	Q13123_325	Q13123	Q13123100137	DIGDYVPS	325	D	I	G	D	Y	V	P	S	10	617.843	2	-0.72	1235.69	20.177	25.6	0.00057	Abu-YVPSTTKTPR	YVPSTTKTPR		No
10000184339	100137	Q96C57_205	Q96C57	Q96C57100137	ASVDSAVA	205	A	S	V	D	S	A	V	A	16	824.932	2	-0.075	1649.86	36.509	40.6	3.9e-06	Abu-SAVAATTPTSMATVQK	SAVAATTPTSMATVQK		No
10000184340	100137	Q96C57_73	Q96C57	Q96C57100137	HEQDGNEL	73	H	E	Q	D	G	N	E	L	11	688.846	2	2.9	1377.69	35.984	30.2	0.00051	Abu-GNELQTTPEFR	GNELQTTPEFR		No
10000184373	100137	O60343_273	O60343	O60343100137	EEADGTDT	273	E	E	A	D	G	T	D	T	21	708.032	3	-3.4	2124.1	46.016	29.9	0.00034	Abu-GTDTHLGLPAGASQPALTSSR	GTDTHLGLPAGASQPALTSSR		No
10000184382	100137	O95391_8	O95391	O95391100137	TVVDAVNA	8	T	V	V	D	A	V	N	A	19	1022.03	2	4.7	2044.06	46.012	31.9	2e-05	Abu-AVNAAPLSGSKEMSLEEPK	AVNAAPLSGSKEMSLEEPK		No
10000184400	100137	Q99081_23	Q99081	Q99081100137	DLLDFSAM	23	D	L	L	D	F	S	A	M	13	735.36	2	2.3	1470.72	34.514	20.2	0.0014	Abu-FSAM(Oxidation)FSPPVNSGK	FSAMFSPPVNSGK		No
10000184404	100137	Q13111_129	Q13111	Q13111100137	EQPDSLVD	129	E	Q	P	D	S	L	V	D	16	919.973	2	1.3	1839.95	25.289	48.3	8.3e-07	Abu-SLVDHNKLNSEASPSR	SLVDHNKLNSEASPSR		No
10000184407	100137	Q15154_194	Q15154	Q15154100137	SEEDGRGE	194	S	E	E	D	G	R	G	E	15	563.619	3	1.5	1690.86	27.131	37	6.6e-05	Abu-GRGEPAMESSQIVSR	GRGEPAMESSQIVSR		No
10000184409	100137	Q13435_777	Q13435	Q13435100137	EAMDGSET	777	E	A	M	D	G	S	E	T	15	893.99	2	1.9	1787.98	58.794	33.4	0.00017	Abu-GSETPQLFTVLPEKR	GSETPQLFTVLPEKR		No
10000184420	100137	P49321_20	P49321	P49321100137	VSADKIED	20	V	S	A	D	K	I	E	D	26	948.49	3	1.5	2845.47	45.818	28.5	0.0027	Abu-KIEDVPAPSTSADKVESLDVDSEAKK	KIEDVPAPSTSADKVESLDVDSEAKK		No
10000184432	100137	P30622_398	P30622	P30622100137	LARDGHDQ	398	L	A	R	D	G	H	D	Q	12	487.59	3	4.3	1462.77	27.611	21	0.01	Abu-GHDQHVLELEAK	GHDQHVLELEAK		No
10000184435	100137	Q8WYQ5_397	Q8WYQ5	Q8WYQ5100137	DEPDSMGA	397	D	E	P	D	S	M	G	A	28	920.79	3	1.9	2762.37	55.343	38	3.2e-06	Abu-SMGADPGPPDEKDPLGAEAAPGALGQVK	SMGADPGPPDEKDPLGAEAAPGALGQVK		No
10000184438	100137	Q63HN8_274	Q63HN8	Q63HN8100137	MAVDAVAE	274	M	A	V	D	A	V	A	E	17	878.477	2	2.7	1756.95	28.325	36.8	3.5e-05	Abu-AVAEPANAVKGAGKEMK	AVAEPANAVKGAGKEMK		No
10000184440	100137	Q63HN8_2283	Q63HN8	Q63HN8100137	VTMDGVRE	2283	V	T	M	D	G	V	R	E	13	787.418	2	-2.6	1574.84	56.108	33.6	0.0014	Abu-GVREEDLAPFSLR	GVREEDLAPFSLR		No
10000184441	100137	Q32MZ4_416	Q32MZ4	Q32MZ4100137	SDLDGGNH	416	S	D	L	D	G	G	N	H	40	1070.98	4	2.7	4283.92	65.308	46.5	9.2e-06	Abu-GGNHTENVGEAAVTQVEEQAGTVASC(Carboxymethyl)PLGHSDDTVYHDDK	GGNHTENVGEAAVTQVEEQAGTVASCPLGHSDDTVYHDDK		No
10000184443	100137	P53621_857	P53621	P53621100137	LDEDGFVE	857	L	D	E	D	G	F	V	E	16	832.415	2	2.9	1664.83	62.933	45.7	2.9e-07	Abu-GFVEATEGLGDDALGK	GFVEATEGLGDDALGK		No
10000184454	100137	Q99733_9	Q99733	Q99733100137	SFSDGVPS	9	S	F	S	D	G	V	P	S	18	944.966	2	-0.19	1889.93	27.176	34.9	3.4e-06	Abu-GVPSDSVEAAKNASNTEK	GVPSDSVEAAKNASNTEK		No
10000184458	100137	P33992_14	P33992	P33992100137	FYSDSFGG	14	F	Y	S	D	S	F	G	G	14	747.333	2	-1.2	1494.67	24.303	43.5	1.4e-06	Abu-SFGGDAQADEGQAR	SFGGDAQADEGQAR		No
10000184466	100137	O60508_205	O60508	O60508100137	DEKDVAKP	205	D	E	K	D	V	A	K	P	18	1065.05	2	0.89	2130.11	35.667	42.6	6.4e-07	Abu-VAKPSEEEQKELDEITAK	VAKPSEEEQKELDEITAK		No
10000184478	100137	P78344_793	P78344	P78344100137	DETDSSSA	793	D	E	T	D	S	S	S	A	14	816.908	2	0.98	1633.82	17.072	46	9.1e-06	Abu-SSSAPSKEQLEQEK	SSSAPSKEQLEQEK		No
10000184483	100137	P45974_768	P45974	P45974100137	DDLDAEAA	768	D	D	L	D	A	E	A	A	11	625.787	2	-1.3	1251.57	29.780	34.8	1.5e-05	Abu-AEAAM(Oxidation)DISEGR	AEAAMDISEGR		No
10000184484	100137	P45974_783	P45974	P45974100137	SAADSISE	783	S	A	A	D	S	I	S	E	13	720.41	2	-6.1	1440.82	39.006	29.3	0.00032	Abu-SISESVPVGPKVR	SISESVPVGPKVR		No
10000184490	100137	Q5SW79_1325	Q5SW79	Q5SW79100137	GEIDSVTS	1325	G	E	I	D	S	V	T	S	27	1305.14	2	-2.9	2610.29	43.871	32.5	1.1e-05	Abu-SVTSSGTAPSTTVSTAATTPGSAIDTR	SVTSSGTAPSTTVSTAATTPGSAIDTR		No
10000184496	100137	Q9P2N5_488	Q9P2N5	Q9P2N5100137	YEPDGYNP	488	Y	E	P	D	G	Y	N	P	14	760.871	2	0.50	1521.74	32.156	41.6	8.1e-08	Abu-GYNPEAPSITSSGR	GYNPEAPSITSSGR		No
10000184498	100137	Q93052_404	Q93052	Q93052100137	MLYDMENP	404	M	L	Y	D	M	E	N	P	12	755.835	2	-0.65	1511.67	40.037	34.4	2.3e-05	Abu-MENPPADEYFGR	MENPPADEYFGR		No
10000184508	100137	Q9H0H5_274	Q9H0H5	Q9H0H5100137	TETDSVGT	274	T	E	T	D	S	V	G	T	12	646.303	2	-5.4	1292.61	14.422	20.3	0.002	Abu-SVGTPQSNGGM(Oxidation)R	SVGTPQSNGGMR		No
10000184511	100137	Q8N684_30	Q8N684	Q8N684100137	DQIDLYDD	30	D	Q	I	D	L	Y	D	D	16	940.948	2	1.3	1881.9	56.627	22.7	0.0013	Abu-LYDDVLTATSQPSDDR	LYDDVLTATSQPSDDR		No
10000184512	100137	Q8N684_34	Q8N684	Q8N684100137	LYDDVLTA	34	L	Y	D	D	V	L	T	A	12	687.85	2	4.9	1375.7	24.343	23.8	0.0037	Abu-VLTATSQPSDDR	VLTATSQPSDDR		No
10000184515	100137	P55884_4	P55884	P55884100137	-MQDAENV	4	-	M	Q	D	A	E	N	V	13	735.364	2	-1.9	1470.73	32.857	24.7	0.00075	Abu-AENVAVPEAAEER	AENVAVPEAAEER		No
10000184521	100137	P07737_15	P07737	P07737100137	LMADGTCQ	15	L	M	A	D	G	T	C	Q	24	1282.15	2	17	2564.3	59.282	31.3	0.00014	Abu-GTC(Carboxymethyl)QDAAIVGYKDSPSVWAAVPGK	GTCQDAAIVGYKDSPSVWAAVPGK		No
10000184525	100137	Q8N9B5_723	Q8N9B5	Q8N9B5100137	DHCDSLPS	723	D	H	C	D	S	L	P	S	19	724.38	3	2.3	2173.14	64.545	33.6	2.6e-05	Abu-SLPSVLQVEEKTEEVGEGR	SLPSVLQVEEKTEEVGEGR		No
10000184532	100137	Q3KQV9_300	Q3KQV9	Q3KQV9100137	CQVDGVPQ	300	C	Q	V	D	G	V	P	Q	19	1094.07	2	4.7	2188.15	66.006	53.9	1.1e-08	Abu-GVPQVVEYSEISPETAQLR	GVPQVVEYSEISPETAQLR		No
10000184536	100137	Q99590_723	Q99590	Q99590100137	MECDSFCS	723	M	E	C	D	S	F	C	S	20	1171.02	2	9.4	2342.04	41.605	23.2	0.017	Abu-SFC(Carboxymethyl)SDQNESEVEPSVNADLK	SFCSDQNESEVEPSVNADLK		No
10000184537	100137	P50851_1757	P50851	P50851100137	SSVDSAQA	1757	S	S	V	D	S	A	Q	A	15	761.333	2	-0.58	1522.67	17.143	37.2	5.3e-07	Abu-SAQASDMGGESPGSR	SAQASDMGGESPGSR		No
10000184538	100137	P50851_1785	P50851	P50851100137	PTVDSVSQ	1785	P	T	V	D	S	V	S	Q	15	867.93	2	12	1735.86	45.305	24.8	0.00075	Abu-SVSQDPVSNMSITER	SVSQDPVSNMSITER		No
10000184539	100137	P54252_218	P54252	P54252100137	EANDGSGM	218	E	A	N	D	G	S	G	M	14	839.871	2	7.2	1679.74	24.428	32.4	9.2e-05	Abu-GSGMLDEDEEDLQR	GSGMLDEDEEDLQR		No
10000184548	100137	Q92499_440	Q92499	Q92499100137	SVPDTVHH	440	S	V	P	D	T	V	H	H	12	705.914	2	-0.90	1411.83	27.783	38.7	4.2e-06	Abu-TVHHVVVPVNPK	TVHHVVVPVNPK		No
10000184549	100137	Q92499_436	Q92499	Q92499100137	KGEDSVPD	436	K	G	E	D	S	V	P	D	16	905.003	2	-1.9	1810.01	43.069	23.2	0.0016	Abu-SVPDTVHHVVVPVNPK	SVPDTVHHVVVPVNPK		No
10000184554	100137	Q16576_99	Q16576	Q16576100137	SHCDSDKG	99	S	H	C	D	S	D	K	G	15	779.38	2	-1.4	1558.76	40.260	34.7	2.9e-06	Abu-SDKGEFGGFGSVTGK	SDKGEFGGFGSVTGK		No
10000184558	100137	P98171_404	P98171	P98171100137	DVLDSFQT	404	D	V	L	D	S	F	Q	T	21	1136.04	2	1.6	2272.08	33.415	38.2	3.6e-06	Abu-SFQTSPSTESLKSTSSDPGSR	SFQTSPSTESLKSTSSDPGSR		No
10000184562	100137	Q9BYJ9_165	Q9BYJ9	Q9BYJ9100137	TVVDGQPG	165	T	V	V	D	G	Q	P	G	12	679.837	2	-2.9	1359.67	23.837	27.3	3.7e-05	Abu-GQPGFHSDTLSK	GQPGFHSDTLSK		No
10000184574	100137	Q8IVD9_126	Q8IVD9	Q8IVD9100137	TELDGHQE	126	T	E	L	D	G	H	Q	E	15	857.473	2	6.6	1714.95	24.891	38	2.7e-06	Abu-GHQEVEKVQPPGPVK	GHQEVEKVQPPGPVK		No
10000184575	100137	Q8IVD9_120	Q8IVD9	Q8IVD9100137	IEIDSTTE	120	I	E	I	D	S	T	T	E	13	779.378	2	6.4	1558.76	20.442	26.3	0.0022	Abu-STTELDGHQEVEK	STTELDGHQEVEK		No
10000184576	100137	P09234_11	P09234	P09234100137	DYCDTYLT	11	D	Y	C	D	T	Y	L	T	11	680.846	2	-0.023	1361.69	26.815	38.6	5.1e-05	Abu-TYLTHDSPSVR	TYLTHDSPSVR		No
10000184580	100137	Q9Y6E0_326	Q9Y6E0	Q9Y6E0100137	AETDGQAS	326	A	E	T	D	G	Q	A	S	17	919.937	2	0.30	1839.87	70.779	53	1.4e-07	Abu-GQASGGSDSGDWIFTIR	GQASGGSDSGDWIFTIR		No
10000184589	100137	Q9UPT8_68	Q9UPT8	Q9UPT8100137	LEDDGAEE	68	L	E	D	D	G	A	E	E	14	759.836	2	-1.1	1519.67	12.378	38.3	5.9e-05	Abu-GAEETQDTSGGPER	GAEETQDTSGGPER		No
10000184590	100137	Q9UPT8_742	Q9UPT8	Q9UPT8100137	LEPDSFSE	742	L	E	P	D	S	F	S	E	26	898.465	3	0.49	2695.4	55.314	27.3	0.0004	Abu-SFSEGGPPGRPKPGAGVPDFLPSAQR	SFSEGGPPGRPKPGAGVPDFLPSAQR		No
10000184594	100137	Q9HCE5_30	Q9HCE5	Q9HCE5100137	ESADSIGA	30	E	S	A	D	S	I	G	A	13	751.41	2	11	1502.82	36.502	32.1	0.00032	Abu-SIGAVLNSKDEQR	SIGAVLNSKDEQR		No
10000184609	100137	O95433_19	O95433	O95433100137	ERADATNV	19	E	R	A	D	A	T	N	V	12	806.88	2	-5.5	1613.76	41.333	26.2	0.00031	Abu-ATNVNNWHWTER	ATNVNNWHWTER		No
10000184610	100137	O95433_255	O95433	O95433100137	HMVDGNVS	255	H	M	V	D	G	N	V	S	14	788.89	2	-8.0	1577.78	57.202	26.1	0.00042	Abu-GNVSGEFTDLVPEK	GNVSGEFTDLVPEK		No
10000184635	100137	Q13136_219	Q13136	Q13136100137	TLTDGVLD	219	T	L	T	D	G	V	L	D	18	1005.99	2	1.0	2011.98	34.243	47.6	5.8e-08	Abu-GVLDINHEQENTPSTSGK	GVLDINHEQENTPSTSGK		No
10000184636	100137	Q8TEU7_1283	Q8TEU7	Q8TEU7100137	CSVDSMSA	1283	C	S	V	D	S	M	S	A	10	596.785	2	0.55	1193.57	21.134	34.2	0.00099	Abu-SMSAALQDER	SMSAALQDER		No
10000184641	100137	Q9H6T3_452	Q9H6T3	Q9H6T3100137	DVPDSTTA	452	D	V	P	D	S	T	T	A	26	1306.68	2	-0.95	2613.36	53.776	46.5	3.7e-08	Abu-STTAAAPENNPINLANVIAATGTTSK	STTAAAPENNPINLANVIAATGTTSK		No
10000184650	100137	Q9UMY4_22	Q9UMY4	Q9UMY4100137	DLTDAYGP	22	D	L	T	D	A	Y	G	P	23	1288.66	2	2.7	2577.33	69.165	52.1	1.4e-06	Abu-AYGPPSNFLEIDIFNPQTVGVGR	AYGPPSNFLEIDIFNPQTVGVGR		No
10000184651	100137	P16333_89	P16333	P16333100137	SVPDSASP	89	S	V	P	D	S	A	S	P	15	817.87	2	2.4	1635.74	23.656	50.5	6.6e-07	Abu-SASPADDSFVDPGER	SASPADDSFVDPGER		No
10000184652	100137	Q9H6R7_509	Q9H6R7	Q9H6R7100137	SICDGSIA	509	S	I	C	D	G	S	I	A	18	954.017	2	2.0	1908.03	57.966	52.3	2e-06	Abu-GSIALDAEPVTQPASLPR	GSIALDAEPVTQPASLPR		No
10000184654	100137	Q9NQ55_246	Q9NQ55	Q9NQ55100137	AEPDGDHN	246	A	E	P	D	G	D	H	N	15	831.93	2	-1.9	1663.86	43.083	46.8	1e-07	Abu-GDHNITELPQAVAGR	GDHNITELPQAVAGR		No
10000184655	100137	Q9P1Y5_862	Q9P1Y5	Q9P1Y5100137	DEGDGSPA	862	D	E	G	D	G	S	P	A	21	1094.98	2	4.1	2189.96	24.031	44.4	2.4e-08	Abu-GSPAGAEDSLEEEASSEGEPR	GSPAGAEDSLEEEASSEGEPR		No
10000184663	100137	Q8N1G4_526	Q8N1G4	Q8N1G4100137	TEADAVSG	526	T	E	A	D	A	V	S	G	29	1006.54	3	3.9	3019.62	65.283	34.8	6.9e-06	Abu-AVSGQLPDPTTNPSAGKDGPSLLVVEQVR	AVSGQLPDPTTNPSAGKDGPSLLVVEQVR		No
10000184676	100137	P18621_111	P18621	P18621100137	LDVDSLVI	111	L	D	V	D	S	L	V	I	14	830.99	2	-0.93	1661.98	43.079	48.1	5.8e-07	Abu-SLVIEHIQVNKAPK	SLVIEHIQVNKAPK		No
10000184681	100137	P08047_200	P08047	P08047100137	VQQDGSGQ	200	V	Q	Q	D	G	S	G	Q	19	1047.08	2	5.9	2094.17	58.844	50.4	2.6e-06	Abu-GSGQIQIIPGANQQIITNR	GSGQIQIIPGANQQIITNR		No
10000184683	100137	P55209_58	P55209	P55209100137	ERLDGLVE	58	E	R	L	D	G	L	V	E	15	858.964	2	2.0	1717.93	69.336	52.5	9.3e-06	Abu-GLVETPTGYIESLPR	GLVETPTGYIESLPR		No
10000184695	100137	Q9H1B7_133	Q9H1B7	Q9H1B7100137	NHVDGSSK	133	N	H	V	D	G	S	S	K	16	812.957	2	2.8	1625.91	39.223	47.8	1.2e-06	Abu-GSSKPAVLAAPSGLER	GSSKPAVLAAPSGLER		No
10000184702	100137	P29083_304	P29083	P29083100137	IDMDAFQE	304	I	D	M	D	A	F	Q	E	20	801.022	3	2.0	2403.07	19.331	36.2	2.1e-05	Abu-AFQEREEGHAGPDDNEEVMR	AFQEREEGHAGPDDNEEVMR		No
10000184704	100137	Q9NPG3_137	Q9NPG3	Q9NPG3100137	DESDSFID	137	D	E	S	D	S	F	I	D	20	1143.07	2	3.1	2286.13	76.462	46.3	9.5e-07	Abu-SFIDNSEAYDELVPASLTTK	SFIDNSEAYDELVPASLTTK		No
10000184723	100137	P15170_40	P15170	P15170100137	SLGDGRPP	40	S	L	G	D	G	R	P	P	22	670.812	4	1.8	2683.25	33.640	30.4	0.00054	Abu-GRPPEESAHEM(Oxidation)MEEEEEIPKPK	GRPPEESAHEMMEEEEEIPKPK		No
10000184726	100137	Q3B7T1_116	Q3B7T1	Q3B7T1100137	DFIDSVGN	116	D	F	I	D	S	V	G	N	17	945.477	2	1.3	1890.95	34.638	43	3.5e-07	Abu-SVGNDVDVVSDSENIKK	SVGNDVDVVSDSENIKK		No
10000184727	100137	P57764_88	P57764	P57764100137	DAMDGQIQ	88	D	A	M	D	G	Q	I	Q	16	819.946	2	2.5	1639.89	41.059	47.1	4.3e-06	Abu-GQIQGSVELAAPGQAK	GQIQGSVELAAPGQAK		No
10000184736	100137	P0DJD0_1500	P0DJD0	P0DJD0100137	DVADAASE	1500	D	V	A	D	A	A	S	E	16	856.419	2	4.1	1712.84	17.934	44.5	1.3e-06	Abu-AASEVEVSSTSETTTK	AASEVEVSSTSETTTK	yes	No
10000184743	100137	Q01130_71	Q01130	Q01130100137	DAEDAMDA	71	D	A	E	D	A	M	D	A	13	719.82	2	1.8	1439.64	50.802	32.9	2.8e-05	Abu-AM(Oxidation)DAM(Oxidation)DGAVLDGR	AMDAMDGAVLDGR		No
10000184745	100137	P61978_129	P61978	P61978100137	LESDAVEC	129	L	E	S	D	A	V	E	C	20	864.389	3	13	2593.17	49.500	25.1	0.00055	Abu-AVEC(Carboxymethyl)LNYQHYKGSDFDC(Carboxymethyl)ELR	AVECLNYQHYKGSDFDCELR		No
10000184750	100137	Q9NZJ0_579	Q9NZJ0	Q9NZJ0100137	TELDGQVE	579	T	E	L	D	G	Q	V	E	32	900.944	4	11	3603.78	62.728	32	0.0068	Abu-GQVENLHLDLC(Carboxymethyl)C(Carboxymethyl)LAGNQEDLSKDSLGPTKSSK	GQVENLHLDLCCLAGNQEDLSKDSLGPTKSSK		No
10000184752	100137	Q9GZR7_297	Q9GZR7	Q9GZR7100137	AESDALPD	297	A	E	S	D	A	L	P	D	22	1184.61	2	14	2369.23	74.204	44.7	3e-06	Abu-ALPDDTVIESEALPSDIAAEAR	ALPDDTVIESEALPSDIAAEAR		No
10000184754	100137	Q5JSH3_84	Q5JSH3	Q5JSH3100137	DSLDSKGK	84	D	S	L	D	S	K	G	K	18	972.041	2	9.8	1944.08	28.656	41.8	7e-07	Abu-SKGKELSDQATASPIVAR	SKGKELSDQATASPIVAR		No
10000184755	100137	P62195_253	P62195	P62195100137	DEIDSIGS	253	D	E	I	D	S	I	G	S	19	654.988	3	1.1	1964.96	25.970	45.3	6.4e-06	Abu-SIGSSRLEGGSGGDSEVQR	SIGSSRLEGGSGGDSEVQR		No
10000184757	100137	Q15056_94	Q15056	Q15056100137	DEVDSLKE	94	D	E	V	D	S	L	K	E	16	903.98	2	-3.8	1807.96	65.986	47.4	2.4e-05	Abu-SLKEALTYDGALLGDR	SLKEALTYDGALLGDR		No
10000184761	100137	Q5TB80_248	Q5TB80	Q5TB80100137	DSLDSVAE	248	D	S	L	D	S	V	A	E	18	1062.57	2	-2.5	2125.13	41.661	43.6	3.3e-06	Abu-SVAEVNLDEQDKITPKPR	SVAEVNLDEQDKITPKPR		No
10000184764	100137	O43865_74	O43865	O43865100137	SSTDSYSS	74	S	S	T	D	S	Y	S	S	19	1054.94	2	-7.8	2109.88	36.407	30.5	8.3e-07	Abu-SYSSAASYTDSSDDEVSPR	SYSSAASYTDSSDDEVSPR		No
10000184765	100137	O43865_6	O43865	O43865100137	SMPDAMPL	6	S	M	P	D	A	M	P	L	15	826.947	2	-9.8	1653.89	53.369	21.7	0.01	Abu-AMPLPGVGEELKQAK	AMPLPGVGEELKQAK		No
10000184766	100137	Q9BSI4_208	Q9BSI4	Q9BSI4100137	SVTDSVNL	208	S	V	T	D	S	V	N	L	17	1026.01	2	2.8	2052.01	44.059	44.3	6.7e-06	Abu-SVNLAEPMEQNPPQQQR	SVNLAEPMEQNPPQQQR		No
10000184770	100137	Q96MX6_119	Q96MX6	Q96MX6100137	NAIDGIGG	119	N	A	I	D	G	I	G	G	19	912.997	2	2.7	1825.99	66.769	38.5	2.5e-07	Abu-GIGGLGIGEGAPEIVTGSR	GIGGLGIGEGAPEIVTGSR		No
10000184778	100137	Q9H3R0_397	Q9H3R0	Q9H3R0100137	DEVDGAEV	397	D	E	V	D	G	A	E	V	15	821.403	2	1.6	1642.81	44.994	42.9	4.9e-06	Abu-GAEVPNPDSVTDDLK	GAEVPNPDSVTDDLK		No
10000184780	100137	P52747_195	P52747	P52747100137	VSIDGSES	195	V	S	I	D	G	S	E	S	19	1018.48	2	-3.6	2036.96	19.815	42.3	3.4e-06	Abu-GSESVAGTGMIGENEQEKK	GSESVAGTGMIGENEQEKK		No
10000184781	100137	Q14004_1354	Q14004	Q14004100137	VSNDGLGS	1354	V	S	N	D	G	L	G	S	12	628.337	2	1.3	1256.67	34.724	32.7	2.8e-05	Abu-GLGSSSAPPLER	GLGSSSAPPLER		No
10000184784	100137	O75880_189	O75880	O75880100137	DEIDSITT	189	D	E	I	D	S	I	T	T	19	1107.11	2	6.9	2214.23	75.001	25.2	0.0097	Abu-SITTLPDLTPLFISIDPER	SITTLPDLTPLFISIDPER		No
10000184785	100137	Q9BRT9_7	Q9BRT9	Q9BRT9100137	EEVDFLGQ	7	E	E	V	D	F	L	G	Q	23	1273.64	2	7.0	2547.29	76.708	33.8	0.00038	Abu-FLGQDSDGGSEEVVLTPAELIER	FLGQDSDGGSEEVVLTPAELIER		No
10000184786	100137	Q9BRT9_14	Q9BRT9	Q9BRT9100137	QDSDGGSE	14	Q	D	S	D	G	G	S	E	16	892.476	2	0.62	1784.95	72.744	24.4	0.0031	Abu-GGSEEVVLTPAELIER	GGSEEVVLTPAELIER		No
10000184788	100137	O75940_63	O75940	O75940100137	ASSDSFAS	63	A	S	S	D	S	F	A	S	12	731.361	2	1.5	1462.72	31.316	41.4	2.9e-06	Abu-SFASTQPTHSWK	SFASTQPTHSWK		No
10000184789	100137	Q6DN90_235	Q6DN90	Q6DN90100137	DFADAITE	235	D	F	A	D	A	I	T	E	11	668.841	2	0.60	1337.68	67.399	45	2.7e-05	Abu-AITELEDAFSR	AITELEDAFSR		No
10000184795	100137	O00562_379	O00562	O00562100137	DFIDAFAS	379	D	F	I	D	A	F	A	S	20	1007.5	2	3.4	2014.99	46.296	41	3e-06	Abu-AFASPVEAEGTPEPGAEAAK	AFASPVEAEGTPEPGAEAAK		No
10000184800	100137	P20700_147	P20700	P20700100137	NSKDAALA	147	N	S	K	D	A	A	L	A	11	572.34	2	-0.42	1144.68	29.004	32.5	3.9e-05	Abu-AALATALGDKK	AALATALGDKK		No
10000184805	100137	Q2NKX8_802	Q2NKX8	Q2NKX8100137	TLQDGKGT	802	T	L	Q	D	G	K	G	T	15	744.405	2	-2.9	1488.81	31.374	20.5	0.014	Abu-GKGTGSADSIATLPK	GKGTGSADSIATLPK		No
10000184807	100137	P62805_26	P62805	P62805100137	VLRDNIQG	26	V	L	R	D	N	I	Q	G	11	648.39	2	-5.1	1296.78	37.675	23.1	0.0026	Abu-NIQGITKPAIR	NIQGITKPAIR		No
10000184808	100137	P62805_70	P62805	P62805100137	VIRDAVTY	70	V	I	R	D	A	V	T	Y	9	552.789	2	2.3	1105.58	14.609	26.8	0.0066	Abu-AVTYTEHAK	AVTYTEHAK		No
10000184811	100137	Q96JM3_586	Q96JM3	Q96JM3100137	LQIDAIDD	586	L	Q	I	D	A	I	D	D	21	833.786	3	17	2501.36	58.261	34.5	0.0009	Abu-AIDDQKC(Carboxymethyl)DILVQEELLASPKK	AIDDQKCDILVQEELLASPKK		No
10000184813	100137	A1X283_683	A1X283	A1X283100137	SLLDGEGP	683	S	L	L	D	G	E	G	P	16	830.403	2	-5.9	1660.81	39.434	41.6	8.5e-06	Abu-GEGPQAVGGQDVAFSR	GEGPQAVGGQDVAFSR		No
10000184814	100137	Q8WYP5_1359	Q8WYP5	Q8WYP5100137	TEKDGDKD	1359	T	E	K	D	G	D	K	D	17	960.98	2	-0.93	1921.96	47.707	42	1.1e-05	Abu-GDKDVFASEVTPSDLQK	GDKDVFASEVTPSDLQK		No
10000184820	100137	Q9ULX6_109	Q9ULX6	Q9ULX6100137	LETDMMQG	109	L	E	T	D	M	M	Q	G	13	707.33	2	20	1414.66	29.095	38.1	1.6e-06	Abu-MMQGGVYGSGGER	MMQGGVYGSGGER		No
10000184821	100137	P25098_482	P25098	P25098100137	NAADAFDI	482	N	A	A	D	A	F	D	I	13	779.848	2	-1.4	1559.7	52.229	37.7	1.3e-06	Abu-AFDIGSFDEEDTK	AFDIGSFDEEDTK	yes	No
10000184824	100137	Q96D71_448	Q96D71	Q96D71100137	ADPDTAIV	448	A	D	P	D	T	A	I	V	10	594.36	2	-11	1188.72	38.355	28	0.0024	Abu-TAIVHPVPIR	TAIVHPVPIR		No
10000184825	100137	Q96D71_512	Q96D71	Q96D71100137	TVADGYSS	512	T	V	A	D	G	Y	S	S	21	773.685	3	1.6	2321.06	50.910	26.7	0.004	Abu-GYSSSDSFTSDPEQIGSNVTR	GYSSSDSFTSDPEQIGSNVTR		No
10000184826	100137	Q86UE4_184	Q86UE4	Q86UE4100137	SRHDGKEV	184	S	R	H	D	G	K	E	V	12	717.349	2	0.16	1434.7	18.256	42.2	2e-05	Abu-GKEVDEGAWETK	GKEVDEGAWETK		No
10000184827	100137	Q01826_255	Q01826	Q01826100137	VEMDSLSE	255	V	E	M	D	S	L	S	E	43	1137.82	4	5.3	4551.27	59.196	42.6	2.6e-05	Abu-SLSELSQQGANHVNFGQQPVPGNTAEQPPSPAQLSHGSQPSVR	SLSELSQQGANHVNFGQQPVPGNTAEQPPSPAQLSHGSQPSVR		No
10000184828	100137	Q7Z591_800	Q7Z591	Q7Z591100137	LEVDGVAA	800	L	E	V	D	G	V	A	A	13	657.362	2	0.25	1314.72	16.615	40.1	5.9e-06	Abu-GVAATPGKAEATR	GVAATPGKAEATR		No
10000184832	100137	Q13177_149	Q13177	Q13177100137	PEKDGFPS	149	P	E	K	D	G	F	P	S	12	622.835	2	-0.51	1245.67	42.877	40.2	8.2e-06	Abu-GFPSGTPALNAK	GFPSGTPALNAK		No
10000184836	100137	P00558_286	P00558	P00558100137	LPVDFVTA	286	L	P	V	D	F	V	T	A	12	735.369	2	2.2	1470.74	35.581	30.9	7.9e-05	Abu-FVTADKFDENAK	FVTADKFDENAK		No
10000184845	100137	Q9Y2K2_384	Q9Y2K2	Q9Y2K2100137	VEPDGTLN	384	V	E	P	D	G	T	L	N	20	1107.04	2	8.2	2214.08	60.985	39.6	1.2e-05	Abu-GTLNLDSDEGEEPSPEALVR	GTLNLDSDEGEEPSPEALVR		No
10000184847	100137	Q8IWI9_572	Q8IWI9	Q8IWI9100137	DSKDSVGD	572	D	S	K	D	S	V	G	D	14	752.885	2	1.6	1505.77	33.235	40.2	1.9e-05	Abu-SVGDSLSGKEDLGR	SVGDSLSGKEDLGR		No
10000184848	100137	Q96BY6_328	Q96BY6	Q96BY6100137	EETDSSEN	328	E	E	T	D	S	S	E	N	12	709.335	2	-5.3	1418.67	25.434	37.6	4.2e-06	Abu-SSENNLHADFAK	SSENNLHADFAK		No
10000184851	100137	O94973_691	O94973	O94973100137	VFSDSASV	691	V	F	S	D	S	A	S	V	18	936.978	2	1.7	1873.96	54.786	41.4	5.2e-05	Abu-SASVVAPLAPGSEDNFAR	SASVVAPLAPGSEDNFAR		No
10000184852	100137	Q14980_1830	Q14980	Q14980100137	EEPDSANS	1830	E	E	P	D	S	A	N	S	10	602.783	2	-1.3	1205.57	25.080	27.9	7.7e-05	Abu-SANSSFYSTR	SANSSFYSTR		No
10000184854	100137	Q8NEF9_212	Q8NEF9	Q8NEF9100137	SEKDSVVS	212	S	E	K	D	S	V	V	S	9	531.297	2	3.0	1062.59	30.548	32.7	0.0014	Abu-SVVSLESQK	SVVSLESQK		No
10000184863	100137	Q9HAW4_564	Q9HAW4	Q9HAW4100137	MGTDGKEE	564	M	G	T	D	G	K	E	E	17	940.05	2	1.5	1880.1	48.162	38.7	1.1e-05	Abu-GKEELKADVVPVTLAPK	GKEELKADVVPVTLAPK		No
10000184867	100137	Q9H0E2_37	Q9H0E2	Q9H0E2100137	VQLDAQAA	37	V	Q	L	D	A	Q	A	A	18	930.493	2	3.6	1860.99	41.056	37.8	7.1e-06	Abu-AQAAQQLQYGGAVGTVGR	AQAAQQLQYGGAVGTVGR		No
10000184869	100137	O14497_607	O14497	O14497100137	LSQDSFGS	607	L	S	Q	D	S	F	G	S	16	822.88	2	-1.0	1645.76	32.147	21.5	0.00051	Abu-SFGSQASSAPSMTSSK	SFGSQASSAPSMTSSK		No
10000184874	100137	O43524_55	O43524	O43524100137	TAADSMIP	55	T	A	A	D	S	M	I	P	18	1040.38	2	-19	2080.76	22.854	31.4	2.1e-07	Abu-SMIPEEEDDEDDEDGGGR	SMIPEEEDDEDDEDGGGR		No
10000184875	100137	Q9NU22_5128	Q9NU22	Q9NU22100137	VDTDSHAE	5128	V	D	T	D	S	H	A	E	25	939.456	3	11	2818.37	38.409	36.4	4.9e-06	Abu-SHAEQGPAQQPQAQVEDADAFEHIK	SHAEQGPAQQPQAQVEDADAFEHIK		No
10000184877	100137	Q8IWU2_901	Q8IWU2	Q8IWU2100137	TESDSVLA	901	T	E	S	D	S	V	L	A	11	622.845	2	-0.78	1245.69	58.864	45	0.001	Abu-SVLADDILASR	SVLADDILASR		No
10000184879	100137	Q9BRS2_130	Q9BRS2	Q9BRS2100137	NVTDSVIN	130	N	V	T	D	S	V	I	N	11	673.394	2	1.1	1346.79	20.007	31.6	0.00082	Abu-SVINKVTEKSR	SVINKVTEKSR		No
10000184881	100137	O15015_1006	O15015	O15015100137	MVVDSVLE	1006	M	V	V	D	S	V	L	E	18	930.965	2	1.9	1861.93	76.739	34.7	2.2e-06	Abu-SVLEDIVNSVSGEGGDAK	SVLEDIVNSVSGEGGDAK		No
10000184885	100137	Q6NZY4_344	Q6NZY4	Q6NZY4100137	DGTDGETE	344	D	G	T	D	G	E	T	E	12	708.853	2	1.6	1417.71	18.252	41.3	0.0002	Abu-GETEVGEIQQNK	GETEVGEIQQNK		No
10000184891	100137	Q92945_129	Q92945	Q92945100137	SQGDSISS	129	S	Q	G	D	S	I	S	S	14	785.939	2	0.84	1571.88	44.897	36.5	1.3e-05	Abu-SISSQLGPIHPPPR	SISSQLGPIHPPPR		No
10000184892	100137	Q5SNT6_1047	Q5SNT6	Q5SNT6100137	DSGDIFST	1047	D	S	G	D	I	F	S	T	13	727.371	2	5.2	1454.74	35.326	35.9	1e-05	Abu-IFSTGTGSQSVER	IFSTGTGSQSVER	yes	No
10000184896	100137	Q96GD3_512	Q96GD3	Q96GD3100137	DSMDSASN	512	D	S	M	D	S	A	S	N	14	773.895	2	0.35	1547.79	32.359	34.9	5.6e-06	Abu-SASNPTNLVSTSQR	SASNPTNLVSTSQR		No
10000184909	100137	Q9UMX0_16	Q9UMX0	Q9UMX0100137	GSQDSAAG	16	G	S	Q	D	S	A	A	G	20	870.435	2	3.8	1740.87	18.544	34.9	1e-05	Abu-SAAGAEGAGAPAAAASAEPK	SAAGAEGAGAPAAAASAEPK		No
10000184912	100137	Q04864_87	Q04864	Q04864100137	DCRDGYYE	87	D	C	R	D	G	Y	Y	E	11	717.325	2	6.8	1434.65	37.319	35	1.1e-05	Abu-GYYEAEFGQER	GYYEAEFGQER		No
10000184914	100137	P12270_2148	P12270	P12270100137	HRTDGFAE	2148	H	R	T	D	G	F	A	E	16	860.96	2	-0.47	1721.92	50.583	36.5	2.9e-05	Abu-GFAEAIHSPQVAGVPR	GFAEAIHSPQVAGVPR		No
10000184915	100137	Q8WXH0_4216	Q8WXH0	Q8WXH0100137	DTLDSSDA	4216	D	T	L	D	S	S	D	A	11	601.294	2	0.47	1202.59	16.858	39.7	0.00021	Abu-SSDAQGGLEPR	SSDAQGGLEPR		No
10000184918	100137	A6H8Y1_526	A6H8Y1	A6H8Y1100137	QNIDGIVG	526	Q	N	I	D	G	I	V	G	14	803.45	2	-2.0	1606.9	36.458	37.3	7.6e-05	Abu-GIVGFASTEKVEKR	GIVGFASTEKVEKR		No
10000184922	100137	P52566_20	P52566	P52566100137	DELDSKLN	20	D	E	L	D	S	K	L	N	11	692.9	2	-1.7	1385.8	15.891	26.2	0.00069	Abu-SKLNYKPPPQK	SKLNYKPPPQK		No
10000184925	100137	Q13601_39	Q13601	Q13601100137	TVPDGWKE	39	T	V	P	D	G	W	K	E	14	582.624	3	-1.3	1747.87	32.844	32.9	6.3e-06	Abu-GWKEPAFSKEDNPR	GWKEPAFSKEDNPR		No
10000184926	100137	Q96G28_142	Q96G28	Q96G28100137	CLTDGSDV	142	C	L	T	D	G	S	D	V	14	838.39	2	15	1676.78	44.352	27.4	6.8e-05	Abu-GSDVVSDLEHEEM(Oxidation)K	GSDVVSDLEHEEMK		No
10000184932	100137	O95926_13	O95926	O95926100137	VLVDSAEE	13	V	L	V	D	S	A	E	E	18	929.487	2	-0.085	1858.97	50.891	35.1	3e-05	Abu-SAEEGSLAAAAELAAQKR	SAEEGSLAAAAELAAQKR		No
10000184936	100137	Q9Y3X0_300	Q9Y3X0	Q9Y3X0100137	EKTDGMFK	300	E	K	T	D	G	M	F	K	16	616.305	3	-0.52	1848.92	28.126	28	7.8e-05	Abu-GMFKDGPVPAHEPSHR	GMFKDGPVPAHEPSHR		No
10000184943	100137	Q86V81_94	Q86V81	Q86V81100137	DLFDSGFG	94	D	L	F	D	S	G	F	G	14	633.3	2	-15	1266.6	25.224	36.9	0.00012	Abu-SGFGGGAGVETGGK	SGFGGGAGVETGGK		No
10000184945	100137	Q9NZB2_450	Q9NZB2	Q9NZB2100137	NHVDSAYF	450	N	H	V	D	S	A	Y	F	30	1001.76	3	-6.0	3005.28	30.664	20.4	0.013	Abu-SAYFPGSSTSSSSDNDEGSGGATNHISGNK	SAYFPGSSTSSSSDNDEGSGGATNHISGNK		No
10000184946	100137	P46379_1002	P46379	P46379100137	DEQDGASA	1002	D	E	Q	D	G	A	S	A	30	1129.92	3	0.17	3389.75	64.850	32.8	1.1e-05	Abu-GASAETEPWAAAVPPEWVPIIQQDIQSQRK	GASAETEPWAAAVPPEWVPIIQQDIQSQRK		No
10000184951	100137	Q12802_545	Q12802	Q12802100137	SSLDGNKP	545	S	S	L	D	G	N	K	P	20	737.688	3	3.5	2213.06	30.191	36.5	0.00012	Abu-GNKPAESSLAFSNEETSTEK	GNKPAESSLAFSNEETSTEK		No
10000184952	100137	Q9HCM1_360	Q9HCM1	Q9HCM1100137	SSVDGVQT	360	S	S	V	D	G	V	Q	T	12	701.862	2	0.053	1403.72	27.050	34.7	4e-05	Abu-GVQTLAQTNEEK	GVQTLAQTNEEK		No
10000184957	100137	O60583_455	O60583	O60583100137	DVRDHYIA	455	D	V	R	D	H	Y	I	A	12	768.897	2	-2.9	1537.79	21.526	35.2	6.4e-05	Abu-HYIAAQVEQQHK	HYIAAQVEQQHK		No
10000184961	100137	Q9Y4K1_68	Q9Y4K1	Q9Y4K1100137	AALDGGVA	68	A	A	L	D	G	G	V	A	18	856.943	2	-1.7	1713.89	18.559	33.5	2.4e-05	Abu-GGVASAASPESKPSPGTK	GGVASAASPESKPSPGTK		No
10000184962	100137	Q8N3X1_154	Q8N3X1	Q8N3X1100137	AEIDAITA	154	A	E	I	D	A	I	T	A	26	867.477	3	-1.1	2602.43	33.618	33.8	2.9e-05	Abu-AITAPQPAAPVGASAPPPTPPRPEPK	AITAPQPAAPVGASAPPPTPPRPEPK		No
10000184965	100137	Q96RS0_344	Q96RS0	Q96RS0100137	TSHDGHQQ	344	T	S	H	D	G	H	Q	Q	12	720.88	2	-2.0	1441.76	11.889	35.9	0.00012	Abu-GHQQLSEVSSKR	GHQQLSEVSSKR		No
10000184969	100137	Q6P1X6_26	Q6P1X6	Q6P1X6100137	CSGDGGVS	26	C	S	G	D	G	G	V	S	14	774.374	2	-2.4	1548.75	24.389	34.2	5e-05	Abu-GGVSYTQGQSPEPR	GGVSYTQGQSPEPR		No
10000184970	100137	Q15361_421	Q15361	Q15361100137	TLFDSVEG	421	T	L	F	D	S	V	E	G	14	762.34	2	0.86	1524.68	23.259	25.6	0.00022	Abu-SVEGDGAMMEEGVK	SVEGDGAMMEEGVK		No
10000184972	100137	Q9H3P2_300	Q9H3P2	Q9H3P2100137	ATPDYAAG	300	A	T	P	D	Y	A	A	G	10	561.811	2	-1.4	1123.62	30.786	27.8	0.00015	Abu-YAAGLVSTQK	YAAGLVSTQK		No
10000184974	100137	O60293_336	O60293	O60293100137	DTTDSSQG	336	D	T	T	D	S	S	Q	G	14	844.937	2	6.0	1689.87	17.165	35.3	0.00011	Abu-SSQGLQDKEQNLTR	SSQGLQDKEQNLTR		No
10000184979	100137	Q9Y2L9_406	Q9Y2L9	Q9Y2L9100137	DRADGLHS	406	D	R	A	D	G	L	H	S	10	655.813	2	-0.046	1311.63	39.269	33	3.2e-05	Abu-GLHSEFMNYK	GLHSEFMNYK		No
10000184983	100137	Q96SB3_552	Q96SB3	Q96SB3100137	VEVDGTSL	552	V	E	V	D	G	T	S	L	17	889.48	2	-16	1778.96	62.892	31.7	1.7e-05	Abu-GTSLVGVTQSFAASVLR	GTSLVGVTQSFAASVLR		No
10000184985	100137	Q7Z333_1535	Q7Z333	Q7Z333100137	VEEDSVSR	1535	V	E	E	D	S	V	S	R	14	787.436	2	5.9	1574.87	36.074	34	7.2e-05	Abu-SVSRPQLESLSGTK	SVSRPQLESLSGTK		No
10000184988	100137	O75367_173	O75367	O75367100137	ASADSTTE	173	A	S	A	D	S	T	T	E	17	898.96	2	12	1797.92	52.166	32	2.5e-05	Abu-STTEGTPADGFTVLSTK	STTEGTPADGFTVLSTK		No
10000185015	100137	O95801_255	O95801	O95801100137	LFLDGLST	255	L	F	L	D	G	L	S	T	11	612.309	2	-2.0	1224.62	14.973	35	0.00021	Abu-GLSTENPHGAR	GLSTENPHGAR		No
10000185018	100137	Q8NCN2_136	Q8NCN2	Q8NCN2100137	GDVDSVTV	136	G	D	V	D	S	V	T	V	13	730.356	2	2.2	1460.71	19.493	34.3	0.00015	Abu-SVTVGAEENPESR	SVTVGAEENPESR		No
10000185024	100137	Q96L14_51	Q96L14	Q96L14100137	GEIDSVTS	51	G	E	I	D	S	V	T	S	16	832.43	2	2.3	1664.86	36.241	30.4	1.5e-05	Abu-SVTSSGTAPSTTLVDR	SVTSSGTAPSTTLVDR		No
10000185026	100137	Q8TEQ6_1320	Q8TEQ6	Q8TEQ6100137	QQLDTAST	1320	Q	Q	L	D	T	A	S	T	25	962.116	3	-3.3	2886.35	23.397	34.2	0.00017	Abu-TASTEETDPETSQPEPNRPSELDLR	TASTEETDPETSQPEPNRPSELDLR		No
10000185028	100137	O60493_33	O60493	O60493100137	LEIDVSNP	33	L	E	I	D	V	S	N	P	11	599.831	2	0.052	1199.66	22.595	33.2	0.0001	Abu-VSNPQTVGVGR	VSNPQTVGVGR		No
10000185033	100137	O00151_55	O00151	O00151100137	TAIDGENT	55	T	A	I	D	G	E	N	T	15	893.913	2	3.2	1787.83	23.722	34.6	0.00028	Abu-GENTSNMTHLEAQNR	GENTSNMTHLEAQNR		No
10000185034	100137	P46940_9	P46940	P46940100137	DEVDGLGV	9	D	E	V	D	G	L	G	V	17	642.339	3	2.2	1927.02	41.096	32.1	6.5e-05	Abu-GLGVARPHYGSVLDNER	GLGVARPHYGSVLDNER		No
10000185040	100137	Q99700_843	Q99700	Q99700100137	SAKDSFIE	843	S	A	K	D	S	F	I	E	33	1189.56	3	2.9	3568.68	52.458	30	2e-05	Abu-SFIENSSSNC(Carboxymethyl)TSGSSKPNSPSISPSILSNTEHK	SFIENSSSNCTSGSSKPNSPSISPSILSNTEHK		No
10000185044	100137	Q8NDV7_1543	Q8NDV7	Q8NDV7100137	TTVDSISV	1543	T	T	V	D	S	I	S	V	14	782.903	2	11	1565.81	27.592	31.8	6.6e-05	Abu-SISVNTSLDQNSSK	SISVNTSLDQNSSK		No
10000185045	100137	Q92541_181	Q92541	Q92541100137	EFHDGYGE	181	E	F	H	D	G	Y	G	E	15	599.929	3	1.1	1799.79	22.978	23.9	4.3e-05	Abu-GYGEDLMGDEEDRAR	GYGEDLMGDEEDRAR		No
10000185056	100137	Q9BUJ2_97	Q9BUJ2	Q9BUJ2100137	SGPDGHYA	97	S	G	P	D	G	H	Y	A	10	631.801	2	-0.72	1263.6	27.026	33	0.00021	Abu-GHYAMDNITR	GHYAMDNITR		No
10000185057	100137	Q5T8P6_281	Q5T8P6	Q5T8P6100137	DQVDHNSY	281	D	Q	V	D	H	N	S	Y	11	705.87	2	1.2	1411.74	24.871	26.4	0.0011	Abu-HNSYVRPPMPK	HNSYVRPPMPK		No
10000185060	100137	P46013_411	P46013	P46013100137	DAADSATK	411	D	A	A	D	S	A	T	K	11	623.835	2	-1.3	1247.67	13.673	33.9	0.00041	Abu-SATKPENLSSK	SATKPENLSSK		No
10000185063	100137	Q9UHB6_346	Q9UHB6	Q9UHB6100137	DSRDSQVK	346	D	S	R	D	S	Q	V	K	21	810.101	3	-1.9	2430.3	27.922	32.1	0.00015	Abu-SQVKSEVQQPVHPKPLSPDSR	SQVKSEVQQPVHPKPLSPDSR		No
10000185084	100137	Q15544_35	Q15544	Q15544100137	TDTDGIPE	35	T	D	T	D	G	I	P	E	15	829.888	2	-4.6	1659.78	25.169	32.3	0.00018	Abu-GIPEETDGDADVDLK	GIPEETDGDADVDLK		No
10000185090	100137	Q07666_76	Q07666	Q07666100137	TGPDATVG	76	T	G	P	D	A	T	V	G	21	1009.07	2	3.4	2018.15	58.227	27.9	1.4e-05	Abu-ATVGGPAPTPLLPPSATASVK	ATVGGPAPTPLLPPSATASVK		No
10000185091	100137	Q53F19_232	Q53F19	Q53F19100137	VELDTLSQ	232	V	E	L	D	T	L	S	Q	12	744.902	2	3.8	1489.8	60.313	34.8	0.00095	Abu-TLSQVEEESLLR	TLSQVEEESLLR		No
10000185092	100137	P19022_800	P19022	P19022100137	VEPDAIKP	800	V	E	P	D	A	I	K	P	9	547.861	2	-1.4	1095.72	22.147	28	0.0017	Abu-AIKPVGIRR	AIKPVGIRR		No
10000185099	100137	P31153_40	P31153	P31153100137	QISDAVLD	40	Q	I	S	D	A	V	L	D	14	803.42	2	6.0	1606.84	35.729	31.1	0.00012	Abu-AVLDAHLQQDPDAK	AVLDAHLQQDPDAK		No
10000185101	100137	P11274_244	P11274	P11274100137	CGVDGDYE	244	C	G	V	D	G	D	Y	E	11	682.308	2	-2.7	1364.62	20.990	29.5	4.8e-05	Abu-GDYEDAELNPR	GDYEDAELNPR		No
10000185103	100137	Q8WUF5_295	Q8WUF5	Q8WUF5100137	SSLDGLGG	295	S	S	L	D	G	L	G	G	17	871.973	2	-0.81	1743.95	42.363	32.5	0.00034	Abu-GLGGTGKDNLTSATLPR	GLGGTGKDNLTSATLPR		No
10000185105	100137	O43399_3	O43399	O43399100137	--MDSAGQ	3	-	-	M	D	S	A	G	Q	13	721.867	2	1.8	1443.73	27.257	31.9	0.00025	Abu-SAGQDINLNSPNK	SAGQDINLNSPNK		No
10000185107	100137	O60216_129	O60216	O60216100137	DDIDVAQQ	129	D	D	I	D	V	A	Q	Q	11	681.86	2	0.062	1363.72	36.759	32.7	0.00049	Abu-VAQQFSLNQSR	VAQQFSLNQSR		No
10000185109	100137	Q7Z739_169	Q7Z739	Q7Z739100137	AITDGQAG	169	A	I	T	D	G	Q	A	G	12	640.32	2	3.9	1280.64	29.235	19.7	0.0078	Abu-GQAGFGNDTLSK	GQAGFGNDTLSK		No
10000185113	100137	Q9UPN6_381	Q9UPN6	Q9UPN6100137	EGQDGVEE	381	E	G	Q	D	G	V	E	E	12	739.856	2	3.2	1479.71	26.094	31.9	0.00036	Abu-GVEEEVFEQEAK	GVEEEVFEQEAK		No
10000185120	100137	Q96T88_119	Q96T88	Q96T88100137	AETDSRPA	119	A	E	T	D	S	R	P	A	26	801.371	4	-0.37	3205.48	68.876	27.9	0.014	Abu-SRPADEDM(Oxidation)WDETELGLYKVNEYVDAR	SRPADEDMWDETELGLYKVNEYVDAR		No
10000185121	100137	Q6ZNE5_29	Q6ZNE5	Q6ZNE5100137	DLVDSVDD	29	D	L	V	D	S	V	D	D	14	804.399	2	0.24	1608.8	58.928	31.9	0.00046	Abu-SVDDAEGLYVAVER	SVDDAEGLYVAVER		No
10000185129	100137	Q14BN4_465	Q14BN4	Q14BN4100137	DTTDAQMD	465	D	T	T	D	A	Q	M	D	14	843.9	2	-4.5	1687.8	37.156	30.9	0.00028	Abu-AQMDEQDLNEPLAK	AQMDEQDLNEPLAK		No
10000185136	100137	Q96N16_18	Q96N16	Q96N16100137	METDAVQM	18	M	E	T	D	A	V	Q	M	10	623.318	2	2.3	1246.64	32.723	37.4	0.017	Abu-AVQMANEELR	AVQMANEELR		No
10000185147	100137	P46087_208	P46087	P46087100137	EEADGGLQ	208	E	E	A	D	G	G	L	Q	35	794.607	5	3.0	3973.03	75.460	34.5	0.0041	Abu-GGLQINVDEEPFVLPPAGEMEQDAQAPDLQRVHKR	GGLQINVDEEPFVLPPAGEMEQDAQAPDLQRVHKR		No
10000185152	100137	Q969V6_122	Q969V6	Q969V6100137	DSSDALSP	122	D	S	S	D	A	L	S	P	23	820.412	3	2.4	2461.24	44.612	29.9	0.0003	Abu-ALSPEQPASHESQGSVPSPLEAR	ALSPEQPASHESQGSVPSPLEAR		No
10000185154	100137	P63241_97	P63241	P63241100137	GIQDGYLS	97	G	I	Q	D	G	Y	L	S	13	761.401	2	2.9	1522.8	66.381	26.1	0.0012	Abu-GYLSLLQDSGEVR	GYLSLLQDSGEVR		No
10000185155	100137	P63241_7	P63241	P63241100137	DDLDFETG	7	D	D	L	D	F	E	T	G	21	783.032	3	5.6	2349.1	44.567	22.8	0.011	Abu-FETGDAGASATFPM(Oxidation)QC(Carboxymethyl)SALRK	FETGDAGASATFPMQCSALRK	yes	No
10000185159	100137	Q7L014_872	Q7L014	Q7L014100137	ESQDVMQQ	872	E	S	Q	D	V	M	Q	Q	11	673.365	2	-2.3	1346.73	33.747	34.2	0.0048	Abu-VM(Oxidation)QQATNAILR	VMQQATNAILR		No
10000185160	100137	O75410_324	O75410	O75410100137	LEFDFTED	324	L	E	F	D	F	T	E	D	11	669.32	2	0.10	1338.64	30.376	28.4	0.00015	Abu-FTEDTGNIEAR	FTEDTGNIEAR		No
10000185161	100137	Q8ND30_32	Q8ND30	Q8ND30100137	DLSDGTCE	32	D	L	S	D	G	T	C	E	27	1024.17	3	-1.9	3072.51	81.725	29.6	0.00032	Abu-GTC(Carboxymethyl)EPGLASPASYMNPFPVLHLIEDLR	GTCEPGLASPASYMNPFPVLHLIEDLR		No
10000185165	100137	Q8TD26_1351	Q8TD26	Q8TD26100137	DKVDGLQK	1351	D	K	V	D	G	L	Q	K	25	686.325	4	-1.4	2745.3	23.888	33.9	0.0047	Abu-GLQKQTESSSDGGDGVFSEKKDDSR	GLQKQTESSSDGGDGVFSEKKDDSR		No
10000185166	100137	P55210_199	P55210	P55210100137	IQADSGPI	199	I	Q	A	D	S	G	P	I	12	671.32	2	-5.1	1342.64	21.959	27.9	0.00013	Abu-SGPINDTDANPR	SGPINDTDANPR		No
10000185173	100137	Q9H2F5_28	Q9H2F5	Q9H2F5100137	DLPDLHEY	28	D	L	P	D	L	H	E	Y	9	594.309	2	-4.4	1188.62	23.275	29	0.00034	Abu-LHEYASINR	LHEYASINR		No
10000185175	100137	Q12959_413	Q12959	Q12959100137	YMNDGYAP	413	Y	M	N	D	G	Y	A	P	34	1189.58	3	6.7	3568.75	63.262	24	0.013	Abu-GYAPPDITNSSSQPVDNHVSPSSFLGQTPASPAR	GYAPPDITNSSSQPVDNHVSPSSFLGQTPASPAR		No
10000185178	100137	P23588_207	P23588	P23588100137	PATDSFDD	207	P	A	T	D	S	F	D	D	8	541.258	2	13	1082.52	34.012	21.7	0.0049	Abu-SFDDYPPR	SFDDYPPR		No
10000185182	100137	Q9UHB9_538	Q9UHB9	Q9UHB9100137	DANDAHQT	538	D	A	N	D	A	H	Q	T	20	585.553	4	-1.7	2342.21	16.747	32.9	0.0037	Abu-AHQTETSSSQVKDNKPLVER	AHQTETSSSQVKDNKPLVER		No
10000185187	100137	Q7Z3T8_108	Q7Z3T8	Q7Z3T8100137	SSVDGGTS	108	S	S	V	D	G	G	T	S	14	804.889	2	1.9	1609.78	50.007	28.6	0.00034	Abu-GGTSDEIQPLYMGR	GGTSDEIQPLYMGR		No
10000185188	100137	P12755_528	P12755	P12755100137	AVPDAAAP	528	A	V	P	D	A	A	A	P	19	668.345	3	0.45	2005.03	67.095	28	0.00025	Abu-AAAPADAPSGLEAELEHLR	AAAPADAPSGLEAELEHLR		No
10000185189	100137	P21399_674	P21399	P21399100137	NLGDSVTT	674	N	L	G	D	S	V	T	T	15	812.425	2	-0.98	1624.85	33.944	29.5	0.00061	Abu-SVTTDHISPAGNIAR	SVTTDHISPAGNIAR		No
10000185194	100137	Q9Y6X4_447	Q9Y6X4	Q9Y6X4100137	EEEDSTSE	447	E	E	E	D	S	T	S	E	11	667.84	2	3.1	1335.68	26.495	30.4	0.0012	Abu-STSEVLDEELK	STSEVLDEELK		No
10000185197	100137	P36508_14	P36508	P36508100137	TLSDGTTA	14	T	L	S	D	G	T	T	A	14	782.926	2	7.8	1565.85	30.401	29.1	0.00059	Abu-GTTAYVQQAVKGEK	GTTAYVQQAVKGEK		No
10000185198	100137	Q96BR5_121	Q96BR5	Q96BR5100137	LAHDGQVN	121	L	A	H	D	G	Q	V	N	13	721.348	2	-1.6	1442.7	17.863	27.3	0.0002	Abu-GQVNEDGQPDLGK	GQVNEDGQPDLGK		No
10000185200	100137	Q6NXE6_83	Q6NXE6	Q6NXE6100137	VSADGSQE	83	V	S	A	D	G	S	Q	E	34	965.233	4	3.7	3860.93	74.598	32.3	0.0042	Abu-GSQEPTHDILQMLSDLQESVASSRPQEVSAYLTR	GSQEPTHDILQMLSDLQESVASSRPQEVSAYLTR		No
10000185201	100137	Q3YBR2_6	Q3YBR2	Q3YBR2100137	SLLDGLAS	6	S	L	L	D	G	L	A	S	14	742.41	2	-6.9	1484.82	28.959	25.9	9.3e-05	Abu-GLASSPRAPLQSSK	GLASSPRAPLQSSK		No
10000185202	100137	P0C7T5_309	P0C7T5	P0C7T5100137	CVVDGQLF	309	C	V	V	D	G	Q	L	F	11	631.828	2	-0.52	1263.66	32.558	29.3	0.00074	Abu-GQLFSGSQTPR	GQLFSGSQTPR		No
10000185203	100137	O60841_21	O60841	O60841100137	IDLDALAA	21	I	D	L	D	A	L	A	A	13	628.847	2	1.9	1257.69	44.178	19.6	0.0031	Abu-ALAAEIEGAGAAK	ALAAEIEGAGAAK		No
10000185207	100137	O60664_220	O60664	O60664100137	TSLDGFDV	220	T	S	L	D	G	F	D	V	11	660.339	2	0.67	1320.68	39.293	25.9	0.0057	Abu-GFDVASVQQQR	GFDVASVQQQR		No
10000185209	100137	Q09666_3719	Q09666	Q09666100137	DTPDINIE	3719	D	T	P	D	I	N	I	E	14	794.943	2	5.9	1589.89	32.526	25.9	0.0029	Abu-INIEGSEGKFKGPK	INIEGSEGKFKGPK		No
10000185210	100137	Q09666_1425	Q09666	Q09666100137	EVPDVNIE	1425	E	V	P	D	V	N	I	E	9	514.27	2	-8.9	1028.54	24.238	20	0.012	Abu-VNIEGPDAK	VNIEGPDAK		No
10000185212	100137	P20618_48	P20618	P20618100137	AGEDFAIV	48	A	G	E	D	F	A	I	V	9	532.788	2	-5.0	1065.58	40.686	30.9	0.0022	Abu-FAIVASDTR	FAIVASDTR		No
10000185213	100137	P46937_112	P46937	P46937100137	ASTDAGTA	112	A	S	T	D	A	G	T	A	13	682.38	2	6.3	1364.76	23.515	27.9	0.00035	Abu-AGTAGALTPQHVR	AGTAGALTPQHVR		No
10000185217	100137	Q8IZ73_442	Q8IZ73	Q8IZ73100137	GLTDSTAP	442	G	L	T	D	S	T	A	P	22	772.722	3	-1.9	2318.17	61.273	29.2	0.00086	Abu-STAPSSELGKDDLEELAAAAQK	STAPSSELGKDDLEELAAAAQK		No
10000185220	100137	Q96FS4_815	Q96FS4	Q96FS4100137	CLQDGGSP	815	C	L	Q	D	G	G	S	P	14	712.345	2	0.65	1424.69	33.346	27.7	0.00039	Abu-GGSPPGPGDLAEER	GGSPPGPGDLAEER		No
10000185227	100137	P23025_6	P23025	P23025100137	AAADGALP	6	A	A	A	D	G	A	L	P	20	1038.07	2	6.0	2076.13	66.631	27.6	0.00043	Abu-GALPEAAALEQPAELPASVR	GALPEAAALEQPAELPASVR		No
10000185228	100137	Q9UNY4_827	Q9UNY4	Q9UNY4100137	DQLDSTGR	827	D	Q	L	D	S	T	G	R	12	711.43	2	-4.2	1422.86	44.876	25.6	0.0032	Abu-STGRPLVILPQR	STGRPLVILPQR		No
10000185236	100137	P30519_252	P30519	P30519100137	TLEDGFPV	252	T	L	E	D	G	F	P	V	12	700.845	2	6.0	1401.69	24.177	24.5	7.6e-05	Abu-GFPVHDGKGDMR	GFPVHDGKGDMR		No
10000185238	100137	Q9UPN9_830	Q9UPN9	Q9UPN9100137	SELDALAS	830	S	E	L	D	A	L	A	S	10	583.83	2	-0.064	1167.66	34.267	28.7	0.00098	Abu-ALASLENHVK	ALASLENHVK		No
10000185241	100137	O75152_349	O75152	O75152100137	DATDKVNK	349	D	A	T	D	K	V	N	K	11	668.407	2	-2.7	1336.81	18.626	28.6	0.0011	Abu-KVNKVGEIHVK	KVNKVGEIHVK		No
10000185244	100137	Q92673_1406	Q92673	Q92673100137	DCGDSHIL	1406	D	C	G	D	S	H	I	L	65	1184.38	6	13	7106.25	38.559	25.1	0.01	Abu-SHILPFSTPGPSTCLPNYYRC(Carboxymethyl)SSGTC(Carboxymethyl)VMDTWVCDGYRDCADGSDEEACPLLANVTAASTPTQLGR	SHILPFSTPGPSTCLPNYYRCSSGTCVMDTWVCDGYRDCADGSDEEACPLLANVTAASTPTQLGR		No
10000185253	100137	Q9H3P7_344	Q9H3P7	Q9H3P7100137	THTDSSEK	344	T	H	T	D	S	S	E	K	20	748.027	3	-2.1	2244.08	27.069	27.1	0.0005	Abu-SSEKELEPEAAEEALENGPK	SSEKELEPEAAEEALENGPK		No
10000185255	100137	P62310_7	P62310	P62310100137	DDVDQQQT	7	D	D	V	D	Q	Q	Q	T	16	985.515	2	2.3	1971.03	64.070	28.6	0.0013	Abu-QQQTTNTVEEPLDLIR	QQQTTNTVEEPLDLIR		No
10000185257	100137	Q5JSZ5_1777	Q5JSZ5	Q5JSZ5100137	IHVDSVLP	1777	I	H	V	D	S	V	L	P	15	825.976	2	-0.73	1651.95	58.863	27.6	0.00076	Abu-SVLPVPPIEFGVSPK	SVLPVPPIEFGVSPK		No
10000185262	100137	P50548_192	P50548	P50548100137	DCSDGTSE	192	D	C	S	D	G	T	S	E	14	807.389	2	3.0	1614.78	43.364	28.9	0.0018	Abu-GTSELEEPLGEDPR	GTSELEEPLGEDPR		No
[truncated: 3,715 more rows]

## Sheet: Consensus Site
	2	3	4	5	6	7	8	9	10	11	12	13	14	15	16	17	18	19	20	21	22	23	24	25	26	27	28	29	30	31	32	33	34	35	36	37	38	39	40	41	42	43	44	45	46	47	48	49	50
	AD	CD	DD	ED	FD	GD	HD	ID	KD	LD	MD	ND	PD	QD	RD	SD	TD	VD	WD	YD	AXD	CXD	DXD	EXD	FXD	GXD	HXD	IXD	KXD	LXD	MXD	NXD	PXD	QXD	RXD	SXD	TXD	VXD	WXD	YXD	AXXD	CXXD	DXXD	EXXD	FXXD	GXXD	HXXD	IXXD	KXXD
Cleavage Sites with Motif	496	98	81	200	117	289	56	295	194	641	162	142	614	164	184	378	620	865	33	84	507	59	415	1114	162	278	113	103	112	462	104	122	65	381	208	695	316	350	18	98	421	87	1288	610	64	156	101	154	46
Total Cleavage Sites	5713	5713	5713	5713	5713	5713	5713	5713	5713	5713	5713	5713	5713	5713	5713	5713	5713	5713	5713	5713	5682	5682	5682	5682	5682	5682	5682	5682	5682	5682	5682	5682	5682	5682	5682	5682	5682	5682	5682	5682	5667	5667	5667	5667	5667	5667	5667	5667	5667
D's with Motif	16262	3635	15148	27185	8128	16795	4352	10204	18199	23140	6892	7537	14308	12741	14885	21262	12702	16461	2641	5851	16301	3778	17447	24268	8860	15781	5957	11474	16189	25044	6214	9671	13610	11482	10696	23090	12771	14736	2298	6386	16157	3528	16766	24862	8071	15741	5722	10533	17224
Total D's	258328	258328	258328	258328	258328	258328	258328	258328	258328	258328	258328	258328	258328	258328	258328	258328	258328	258328	258328	258328	256053	256053	256053	256053	256053	256053	256053	256053	256053	256053	256053	256053	256053	256053	256053	256053	256053	256053	256053	256053	253971	253971	253971	253971	253971	253971	253971	253971	253971
Expected Cleavage Sites with Motif	359.639	80.3891	335.002	601.204	179.753	371.426	96.2458	225.664	402.476	511.748	152.419	166.683	316.426	281.771	329.186	470.215	280.908	364.04	58.4065	129.397	361.731	83.8365	387.161	538.524	196.61	350.192	132.19	254.616	359.246	555.744	137.893	214.606	302.016	254.794	237.352	512.384	283.398	327.002	50.9943	141.71	360.52	78.7223	374.109	554.76	180.093	351.238	127.678	235.029	384.329
Fold Enrichment	1.37916	1.21907	0.241789	0.332666	0.650893	0.778082	0.581844	1.30725	0.482016	1.25257	1.06286	0.851917	1.94042	0.582033	0.558954	0.803887	2.20712	2.37611	0.565006	0.649167	1.40159	0.70375	1.0719	2.06862	0.823967	0.793851	0.854829	0.40453	0.311764	0.831317	0.754207	0.568482	0.215221	1.49533	0.876336	1.35641	1.11504	1.07033	0.352981	0.691554	1.16776	1.10515	3.44284	1.09957	0.355372	0.444143	0.791051	0.655239	0.119689
p-value	7.79415e-13	0.0499364	1.16272e-65	1.35141e-88	3.60027e-07	4.16403e-06	8.25908e-06	4.39271e-06	4.38177e-33	4.23319e-09	0.418245	0.0490462	9.25927e-55	4.929e-15	2.08293e-19	3.91257e-06	4.40227e-75	6.34664e-124	0.000358295	1.68171e-05	3.19881e-14	0.00411311	0.139549	5.82178e-122	0.00963203	3.39162e-05	0.0865666	1.85265e-28	9.87805e-56	1.51247e-05	0.00242349	2.37829e-12	1.53661e-64	1.42111e-14	0.0498013	2.81917e-16	0.0468339	0.180435	1.34665e-07	8.06958e-05	0.00110315	0.31513	0	0.0133033	3.35152e-24	1.33291e-33	0.013563	8.56306e-09	3.28553e-112
0	6.40813e-164	2.76754e-36	2.16292e-152	6.88052e-280	5.95677e-81	1.87042e-169	2.33215e-43	7.27266e-102	4.29642e-184	2.61676e-236	1.39022e-68	4.97237e-75	9.83003e-144	1.15515e-127	1.11923e-149	2.47579e-216	2.89247e-127	5.51714e-166	1.64523e-26	3.25282e-58	6.14496e-165	7.99475e-38	6.64181e-177	2.36021e-249	1.27347e-88	1.58177e-159	1.77932e-59	3.659e-115	9.01337e-164	9.86855e-258	4.8294e-62	7.95953e-97	4.58355e-137	3.03175e-115	3.11015e-107	1.09151e-236	1.93801e-128	1.0881e-148	3.1757e-23	9.22224e-64	2.14489e-164	1.51018e-35	8.79555e-171	2.63321e-257	3.9992e-81	4.84026e-160	1.8766e-57	3.50768e-106	1.3485e-175
1	2.51887e-161	2.30832e-34	7.88235e-150	4.74025e-277	1.13136e-78	7.61027e-167	2.33559e-41	1.74893e-99	1.90559e-181	1.50749e-233	2.22764e-66	8.73614e-73	3.37178e-141	3.50525e-125	4.00355e-147	1.29988e-213	8.74884e-125	2.19704e-163	9.93033e-25	4.40627e-56	2.43157e-162	6.95962e-36	2.82678e-174	1.43939e-246	2.65451e-86	6.04599e-157	2.46408e-57	9.98541e-113	3.54041e-161	6.23223e-255	6.98384e-60	1.81711e-94	1.4971e-134	8.2797e-113	7.8864e-105	6.3007e-234	5.9188e-126	3.86641e-146	1.67151e-21	1.37152e-61	8.45967e-162	1.23351e-33	3.60929e-168	1.66038e-254	7.61411e-79	1.85657e-157	2.50849e-55	8.80573e-104	5.69606e-173
2	4.94934e-159	9.62215e-33	1.43593e-147	1.63252e-274	1.07406e-76	1.54785e-164	1.16904e-39	2.10234e-97	4.22493e-179	4.34128e-231	1.78417e-64	7.67204e-71	5.7813e-139	5.31692e-123	7.15872e-145	3.41167e-211	1.32278e-122	4.37347e-161	2.99521e-23	2.98332e-54	4.80972e-160	3.02791e-34	6.01402e-172	4.38811e-244	2.76581e-84	1.1552e-154	1.70559e-55	1.36215e-110	6.95159e-159	1.96747e-252	5.04798e-58	2.07359e-92	2.44431e-132	1.13029e-110	9.99604e-103	1.81812e-231	9.03585e-124	6.86768e-144	4.39625e-20	1.01951e-59	1.66789e-159	5.03525e-32	7.40364e-166	5.23364e-252	7.24608e-77	3.55974e-155	1.67598e-53	1.10499e-101	1.20272e-170
3	6.48175e-157	2.67275e-31	1.74347e-145	3.74738e-272	6.79574e-75	2.09827e-162	3.89933e-38	1.68431e-95	6.24335e-177	8.33285e-229	9.52345e-63	4.4903e-69	6.60682e-137	5.37524e-121	8.53153e-143	5.96817e-209	1.33298e-120	5.80257e-159	6.01946e-22	1.34613e-52	6.34099e-158	8.77841e-33	8.52792e-170	8.91643e-242	1.92063e-82	1.47112e-152	7.86777e-54	1.23844e-108	9.09742e-157	4.13985e-250	2.43165e-56	1.57707e-90	2.65988e-130	1.02839e-108	8.44437e-101	3.49676e-229	9.19393e-122	8.13041e-142	7.70366e-19	5.05059e-58	2.19172e-157	1.36964e-30	1.01222e-163	1.09955e-249	4.59582e-75	4.54913e-153	7.46241e-52	9.24153e-100	1.69262e-168
4	6.36493e-155	5.56556e-30	1.58726e-143	6.45009e-270	3.22384e-73	2.13281e-160	9.75073e-37	1.01177e-93	6.91791e-175	1.19932e-226	3.81131e-61	1.97045e-67	5.66125e-135	4.0746e-119	7.62383e-141	7.82848e-207	1.00718e-118	5.77259e-157	9.06791e-21	4.55386e-51	6.2683e-156	1.90791e-31	9.06733e-168	1.35853e-239	9.99994e-81	1.40474e-150	2.72107e-52	8.44245e-107	8.92707e-155	6.53171e-248	8.78211e-55	8.99324e-89	2.1703e-128	7.01567e-107	5.3487e-99	5.04284e-227	7.01426e-120	7.21719e-140	1.01182e-17	1.8759e-56	2.15952e-155	2.79289e-29	1.03767e-161	1.73216e-247	2.18551e-73	4.35906e-151	2.49113e-50	5.79521e-98	1.78612e-166
5	4.99897e-153	9.26728e-29	1.15576e-141	8.87974e-268	1.22312e-71	1.73392e-158	1.94983e-35	4.86083e-92	6.13085e-173	1.3806e-224	1.21984e-59	6.91529e-66	3.87984e-133	2.4703e-117	5.44882e-139	8.21306e-205	6.08656e-117	4.59311e-155	1.0922e-19	1.23201e-49	4.95596e-154	3.31585e-30	7.71085e-166	1.65555e-237	4.16404e-79	1.07282e-148	7.52602e-51	4.60297e-105	7.00623e-153	8.24259e-246	2.53652e-53	4.10155e-87	1.4163e-126	3.82785e-105	2.70957e-97	5.81669e-225	4.27997e-118	5.12397e-138	1.06252e-16	5.5721e-55	1.70182e-153	4.55396e-28	8.50805e-160	2.18251e-245	8.31188e-72	3.34073e-149	6.65043e-49	2.90646e-96	1.50747e-164
6	3.27101e-151	1.28534e-27	7.01128e-140	1.0185e-265	3.86591e-70	1.17441e-156	3.24785e-34	1.94553e-90	4.52672e-171	1.32411e-222	3.25244e-58	2.0218e-64	2.21527e-131	1.24773e-115	3.24446e-137	7.17883e-203	3.06437e-115	3.04479e-153	1.09566e-18	2.77659e-48	3.26452e-152	4.80018e-29	5.46312e-164	1.68087e-235	1.44452e-77	6.82605e-147	1.73404e-49	2.09078e-103	4.58113e-151	8.6661e-244	6.10305e-52	1.55839e-85	7.70018e-125	1.73998e-103	1.14355e-95	5.58984e-223	2.17573e-116	3.03079e-136	9.29217e-16	1.3788e-53	1.11734e-151	6.18501e-27	5.81186e-158	2.29111e-243	2.6335e-70	2.13306e-147	1.479e-47	1.21439e-94	1.05999e-162
7	1.83413e-149	1.52734e-26	3.6448e-138	1.0011e-263	1.04702e-68	6.8165e-155	4.63523e-33	6.67264e-89	2.86416e-169	1.08826e-220	7.43066e-57	5.06506e-63	1.08388e-129	5.40051e-114	1.6555e-135	5.3772e-201	1.32206e-113	1.72965e-151	9.41586e-18	5.36182e-47	1.84272e-150	5.95362e-28	3.31688e-162	1.46247e-233	4.29395e-76	3.72187e-145	3.42338e-48	8.13801e-102	2.56691e-149	7.80802e-242	1.25823e-50	5.0738e-84	3.58747e-123	6.77751e-102	4.13561e-94	4.60339e-221	9.47789e-115	1.53621e-134	6.96121e-15	2.92342e-52	6.28642e-150	7.19687e-26	3.40211e-156	2.06108e-241	7.14968e-69	1.16711e-145	2.81828e-46	4.34798e-93	6.38709e-161
8	8.99671e-148	1.58733e-25	1.6575e-136	8.60814e-262	2.48049e-67	3.46104e-153	5.78598e-32	2.00191e-87	1.58532e-167	7.82452e-219	1.48495e-55	1.10995e-61	4.63917e-128	2.04477e-112	7.38954e-134	3.52346e-199	4.9895e-112	8.59529e-150	7.07634e-17	9.05666e-46	9.09919e-149	6.4583e-27	1.76166e-160	1.11314e-231	1.11654e-74	1.77523e-143	5.91163e-47	2.77088e-100	1.2582e-147	6.15418e-240	2.26901e-49	1.44502e-82	1.46209e-121	2.30934e-100	1.30833e-92	3.31641e-219	3.61171e-113	6.81152e-133	4.56028e-14	5.42178e-51	3.09403e-148	7.32408e-25	1.74215e-154	1.62201e-239	1.69792e-67	5.58626e-144	4.69736e-45	1.36177e-91	3.36674e-159
9	3.92175e-146	1.46571e-24	6.69841e-135	6.57802e-260	5.22198e-66	1.56169e-151	6.41729e-31	5.33728e-86	7.798e-166	4.99956e-217	2.63697e-54	2.16139e-60	1.76456e-126	6.87999e-111	2.9312e-132	2.05178e-197	1.6734e-110	3.79583e-148	4.72457e-16	1.35931e-44	3.9929e-147	6.22458e-26	8.31496e-159	7.52945e-230	2.57993e-73	7.5247e-142	9.07102e-46	8.38398e-99	5.48064e-146	4.31074e-238	3.63588e-48	3.65714e-81	5.29538e-120	6.99258e-99	3.67807e-91	2.12328e-217	1.22307e-111	2.68397e-131	2.65387e-13	8.93499e-50	1.35328e-146	6.62229e-24	7.92804e-153	1.1344e-237	3.58312e-66	2.37614e-142	6.95691e-44	3.79008e-90	1.5771e-157
10	1.5382e-144	1.21751e-23	2.43572e-133	4.52303e-258	9.89108e-65	6.3405e-150	6.40312e-30	1.28031e-84	3.45135e-164	2.87443e-215	4.21308e-53	3.78678e-59	6.03902e-125	2.08287e-109	1.04619e-130	1.07507e-195	5.04976e-109	1.50831e-146	2.83737e-15	1.83553e-43	1.57656e-145	5.39698e-25	3.53132e-157	4.58272e-228	5.36362e-72	2.86986e-140	1.25226e-44	2.28249e-97	2.14808e-144	2.71694e-236	5.24176e-47	8.32775e-80	1.72565e-118	1.90508e-97	9.30353e-90	1.22319e-215	3.72663e-110	9.51584e-130	1.38912e-12	1.32478e-48	5.32583e-145	5.38647e-23	3.24627e-151	7.13876e-236	6.80325e-65	9.0941e-141	9.26973e-43	9.49106e-89	6.64735e-156
11	5.48339e-143	9.18985e-23	8.04976e-132	2.82668e-256	1.70266e-63	2.33967e-148	5.80578e-29	2.79126e-83	1.38836e-162	1.50204e-213	6.11729e-52	6.02946e-58	1.87843e-123	5.73103e-108	3.39369e-129	5.11978e-194	1.38496e-107	5.44727e-145	1.54822e-14	2.25246e-42	5.65765e-144	4.25211e-24	1.36307e-155	2.5351e-226	1.01342e-70	9.94795e-139	1.57106e-43	5.64751e-96	7.65195e-143	1.55639e-234	6.86758e-46	1.72344e-78	5.11098e-117	4.71715e-96	2.13877e-88	6.40454e-214	1.032e-108	3.06631e-128	6.60604e-12	1.78506e-47	1.90497e-143	3.98112e-22	1.20811e-149	4.08311e-234	1.17394e-63	3.16336e-139	1.12246e-41	2.16007e-87	2.54648e-154
12	1.7914e-141	6.35561e-22	2.43806e-130	1.61898e-254	2.68592e-62	7.91212e-147	4.82352e-28	5.57666e-82	5.11827e-161	7.19327e-212	8.13935e-51	8.79758e-57	5.35461e-122	1.44511e-106	1.00888e-127	2.23449e-192	3.481e-106	1.80291e-143	7.73961e-14	2.53288e-41	1.86066e-142	3.06957e-23	4.82176e-154	1.28523e-224	1.7547e-69	3.16018e-137	1.80612e-42	1.28056e-94	2.49804e-141	8.17097e-233	8.24505e-45	3.26855e-77	1.38726e-115	1.07039e-94	4.5058e-87	3.07325e-212	2.61902e-107	9.05498e-127	2.87796e-11	2.20407e-46	6.24448e-142	2.69597e-21	4.12034e-148	2.1403e-232	1.85633e-62	1.00842e-137	1.24546e-40	4.5052e-86	8.94007e-153
13	5.40093e-140	4.05552e-21	6.81452e-129	8.55755e-253	3.90988e-61	2.46925e-145	3.69765e-27	1.02817e-80	1.74133e-159	3.17916e-210	9.99349e-50	1.18454e-55	1.40861e-120	3.36277e-105	2.76783e-126	9.00008e-191	8.07414e-105	5.50682e-142	3.56944e-13	2.62818e-40	5.64718e-141	2.04453e-22	1.57409e-152	6.01324e-223	2.80367e-68	9.26451e-136	1.91598e-41	2.67958e-93	7.52592e-140	3.95886e-231	9.13424e-44	5.72041e-76	3.47487e-114	2.24143e-93	8.75991e-86	1.36097e-210	6.13374e-106	2.46768e-125	1.15664e-10	2.51126e-45	1.88902e-140	1.68446e-20	1.29686e-146	1.03538e-230	2.70875e-61	2.96666e-136	1.27519e-39	8.67118e-85	2.89651e-151
14	1.51166e-138	2.40189e-20	1.76822e-127	4.19932e-251	5.28345e-60	7.15402e-144	2.63103e-26	1.75975e-79	5.49985e-158	1.30442e-208	1.13899e-48	1.48053e-54	3.44e-119	7.26434e-104	7.04929e-125	3.36535e-189	1.73857e-103	1.56149e-140	1.52775e-12	2.53139e-39	1.59113e-139	1.26395e-21	4.7705e-151	2.61189e-221	4.15852e-67	2.5214e-134	1.88667e-40	5.20513e-92	2.10489e-138	1.78068e-229	9.3933e-43	9.29376e-75	8.08024e-113	4.35719e-92	1.58097e-84	5.59519e-209	1.33357e-104	6.24307e-124	4.3138e-10	2.65598e-44	5.30501e-139	9.76834e-20	3.78936e-145	4.64992e-229	3.66916e-60	8.10219e-135	1.21193e-38	1.54931e-83	8.71204e-150
15	3.94797e-137	1.32708e-19	4.28121e-126	1.92288e-249	6.66159e-59	1.93405e-142	1.74657e-25	2.81031e-78	1.6209e-156	4.99414e-207	1.2112e-47	1.72657e-53	7.8389e-118	1.46426e-102	1.67526e-123	1.17423e-187	3.4931e-102	4.13153e-139	6.09957e-12	2.27483e-38	4.18324e-138	7.28975e-21	1.34906e-149	1.05862e-219	5.7552e-66	6.40313e-133	1.73336e-39	9.43446e-91	5.49328e-137	7.47385e-228	9.01266e-42	1.40886e-73	1.75322e-111	7.90332e-91	2.66235e-83	2.14646e-207	2.70538e-103	1.47379e-122	1.50068e-09	2.6209e-43	1.39017e-137	5.28464e-19	1.03317e-143	1.94864e-227	4.63733e-59	2.06475e-133	1.07464e-37	2.58293e-82	2.44511e-148
16	9.66404e-136	6.87094e-19	9.71541e-125	8.2528e-248	7.87187e-58	4.90062e-141	1.08652e-24	4.20637e-77	4.47746e-155	1.79217e-205	1.2071e-46	1.88707e-52	1.67423e-116	2.76631e-101	3.73149e-122	3.84014e-186	6.57793e-101	1.02459e-137	2.28178e-11	1.91583e-37	1.03082e-136	3.93977e-20	3.57576e-148	4.02164e-218	7.46493e-65	1.52408e-131	1.49245e-38	1.60272e-89	1.34369e-135	2.9402e-226	8.1042e-41	2.00168e-72	3.56541e-110	1.34359e-89	4.20202e-82	7.71798e-206	5.14399e-102	3.2609e-121	4.89125e-09	2.42381e-42	3.41439e-136	2.67903e-18	2.64022e-142	7.65405e-226	5.49298e-58	4.93171e-132	8.93033e-37	4.0359e-81	6.43196e-147
17	2.22592e-134	3.34663e-18	2.07453e-123	3.33294e-246	8.75219e-57	1.16843e-139	6.3589e-24	5.92394e-76	1.16379e-153	6.05162e-204	1.13188e-45	1.94055e-51	3.36463e-115	4.91748e-100	7.8207e-121	1.18172e-184	1.16554e-99	2.39086e-136	8.02927e-11	1.51804e-36	2.39014e-135	2.00312e-19	8.91811e-147	1.4376e-216	9.11035e-64	3.41341e-130	1.20901e-37	2.56184e-88	3.09266e-134	1.08839e-224	6.8563e-40	2.67589e-71	6.82249e-109	2.14922e-88	6.24027e-81	2.61131e-204	9.20302e-101	6.78894e-120	1.49953e-08	2.10898e-41	7.89087e-135	1.27764e-17	6.34859e-141	2.82896e-224	6.1219e-57	1.10839e-130	6.98211e-36	5.9336e-80	1.59205e-145
18	4.84098e-133	1.53879e-17	4.18263e-122	1.27097e-244	9.18758e-56	2.63043e-138	3.51338e-23	7.87716e-75	2.85624e-152	1.9295e-202	1.00206e-44	1.8841e-50	6.38451e-114	8.25368e-99	1.54767e-119	3.43368e-183	1.94997e-98	5.26781e-135	2.66693e-10	1.13562e-35	5.23277e-134	9.61446e-19	2.10015e-145	4.85239e-215	1.04977e-62	7.21838e-129	9.24669e-37	3.8664e-87	6.72104e-133	3.80429e-223	5.47643e-39	3.37749e-70	1.23266e-107	3.24603e-87	8.74995e-80	8.34243e-203	1.55462e-99	1.33455e-118	4.33906e-08	1.73251e-40	1.7219e-133	5.75196e-17	1.44141e-139	9.87282e-223	6.44182e-56	2.35211e-129	5.1538e-35	8.2367e-79	3.72084e-144
19	9.97172e-132	6.69992e-17	7.98712e-121	4.59061e-243	9.13424e-55	5.60874e-137	1.83827e-22	9.92035e-74	6.63941e-151	5.82691e-201	8.40163e-44	1.73248e-49	1.14744e-112	1.31208e-97	2.90084e-118	9.44987e-182	3.08985e-97	1.09931e-133	8.3873e-10	8.04545e-35	1.08506e-132	4.36987e-18	4.68427e-144	1.55129e-213	1.14562e-61	1.44578e-127	6.69745e-36	5.52668e-86	1.38342e-131	1.25946e-221	4.14262e-38	4.03753e-69	2.10936e-106	4.64331e-86	1.16201e-78	2.52434e-201	2.48729e-98	2.48472e-117	1.18874e-07	1.34788e-39	3.5588e-132	2.4521e-16	3.09963e-138	3.26347e-221	6.41974e-55	4.72753e-128	3.60273e-34	1.0829e-77	8.23646e-143
20	1.95086e-130	2.77004e-16	1.4486e-119	1.57483e-241	8.62454e-54	1.13586e-135	9.13351e-22	1.18655e-72	1.46584e-149	1.67132e-199	6.68985e-43	1.51292e-48	1.9586e-111	1.981e-96	5.16398e-117	2.47011e-180	4.65003e-96	2.17887e-132	2.50445e-09	5.413e-34	2.13696e-131	1.886e-17	9.92327e-143	4.71042e-212	1.18737e-60	2.75033e-126	4.60685e-35	7.5029e-85	2.70452e-130	3.96026e-220	2.97597e-37	4.58392e-68	3.42824e-105	6.30827e-85	1.4656e-77	7.25487e-200	3.77953e-97	4.39377e-116	3.09196e-07	9.95875e-39	6.98583e-131	9.92618e-16	6.33069e-137	1.02458e-219	6.07599e-54	9.02461e-127	2.3917e-33	1.35215e-76	1.73165e-141
21	3.63402e-129	1.09022e-15	2.50155e-118	5.14414e-240	7.75316e-53	2.19023e-134	4.32016e-21	1.35126e-71	3.08143e-148	4.5645e-198	5.07152e-42	1.25789e-47	3.18319e-110	2.84777e-95	8.75285e-116	6.14779e-179	6.66306e-95	4.11195e-131	7.1182e-09	3.46724e-33	4.00722e-130	7.74874e-17	2.00159e-141	1.36188e-210	1.1717e-59	4.98162e-125	3.01688e-34	9.69813e-84	5.03421e-129	1.18571e-218	2.03537e-36	4.95503e-67	5.30509e-104	8.15993e-84	1.76e-76	1.98529e-198	5.46824e-96	7.39774e-115	7.65459e-07	7.00522e-38	1.30568e-129	3.82503e-15	1.23112e-135	3.06283e-218	5.47513e-53	1.64032e-125	1.5116e-32	1.6075e-75	3.46646e-140
22	6.46013e-128	4.09395e-15	4.12251e-117	1.60359e-238	6.65099e-52	4.03039e-133	1.94975e-20	1.46847e-70	6.18177e-147	1.18967e-196	3.66873e-41	9.97993e-47	4.93707e-109	3.90671e-94	1.4158e-114	1.46022e-177	9.11121e-94	7.40552e-130	1.9301e-08	2.11921e-32	7.17103e-129	3.03755e-16	3.8529e-140	3.75768e-209	1.10335e-58	8.61087e-124	1.8852e-33	1.19626e-82	8.9426e-128	3.3879e-217	1.32833e-35	5.11126e-66	7.8343e-103	1.00726e-82	2.01692e-75	5.18464e-197	7.54991e-95	1.18864e-113	1.80775e-06	4.70206e-37	2.32888e-128	1.40631e-14	2.28475e-134	8.73782e-217	4.708e-52	2.84522e-124	9.11605e-32	1.82371e-74	6.62224e-139
23	1.09821e-126	1.46983e-14	6.49682e-116	4.78054e-237	5.45578e-51	7.09243e-132	8.41348e-20	1.52603e-69	1.18595e-145	2.96524e-195	2.53774e-40	7.57133e-46	7.32255e-108	5.12508e-93	2.19e-113	3.31678e-176	1.19141e-92	1.27542e-128	5.00313e-08	1.23853e-31	1.22718e-127	1.13846e-15	7.09238e-139	9.91512e-208	9.93519e-58	1.42335e-122	1.12642e-32	1.41106e-81	1.5191e-126	9.25729e-216	8.28928e-35	5.04175e-65	1.10635e-101	1.18899e-81	2.21025e-74	1.29482e-195	9.96822e-94	1.82636e-112	4.08111e-06	3.01789e-36	3.97233e-127	4.94332e-14	4.05479e-133	2.38386e-215	3.87115e-51	4.71948e-123	5.25676e-31	1.9785e-73	1.2098e-137
24	1.78871e-125	5.05486e-14	9.80957e-115	1.36547e-235	4.28758e-50	1.19579e-130	3.47785e-19	1.51936e-68	2.17988e-144	7.08128e-194	1.68172e-39	5.50298e-45	1.04055e-106	6.4416e-92	3.2456e-112	7.21825e-175	1.49262e-91	2.10458e-127	1.24216e-07	6.93432e-31	2.0121e-126	4.08725e-15	1.25086e-137	2.50666e-206	8.57096e-57	2.25418e-121	6.44774e-32	1.59464e-80	2.4724e-125	2.42358e-214	4.95557e-34	4.76462e-64	1.49689e-100	1.34466e-80	2.32054e-73	3.09828e-194	1.26095e-92	2.68864e-111	8.82403e-06	1.85561e-35	6.49165e-126	1.66445e-13	6.89462e-132	6.23132e-214	3.04949e-50	7.50035e-122	2.90396e-30	2.05642e-72	2.11756e-136
25	2.79615e-124	1.66811e-13	1.42156e-113	3.74338e-234	3.23376e-49	1.93502e-129	1.37955e-18	1.4518e-67	3.84566e-143	1.62307e-192	1.06952e-38	3.83847e-44	1.41914e-105	7.77045e-91	4.61646e-111	1.50771e-173	1.79472e-90	3.33305e-126	2.95895e-07	3.72579e-30	3.16631e-125	1.40807e-14	2.11736e-136	6.08232e-205	7.09621e-56	3.42633e-120	3.54188e-31	1.72955e-79	3.86205e-124	6.08985e-213	2.84311e-33	4.32137e-63	1.94379e-99	1.4595e-79	2.33824e-72	7.11549e-193	1.53086e-91	3.79875e-110	1.83045e-05	1.09496e-34	1.01819e-124	5.37764e-13	1.12517e-130	1.56334e-212	2.30544e-49	1.14402e-120	1.5395e-29	2.05134e-71	3.55734e-135
26	4.20188e-123	5.29064e-13	1.98033e-112	9.86547e-233	2.34443e-48	3.01006e-128	5.25961e-18	1.33352e-66	6.52186e-142	3.57629e-191	6.53809e-38	2.57365e-43	1.86058e-104	9.01057e-90	6.31223e-110	3.02743e-172	2.07443e-89	5.07436e-125	6.77363e-07	1.92419e-29	4.78984e-124	4.66218e-14	3.44542e-135	1.41877e-203	5.64758e-55	5.00645e-119	1.87015e-30	1.80325e-78	5.79932e-123	1.47104e-211	1.56788e-32	3.76755e-62	2.4264e-98	1.52281e-78	2.26484e-71	1.57094e-191	1.78661e-90	5.15951e-109	3.64875e-05	6.21048e-34	1.53521e-123	1.66985e-12	1.76518e-129	3.77048e-211	1.67538e-48	1.67744e-119	7.84478e-29	1.96703e-70	5.74483e-134
27	6.079e-122	1.61511e-12	2.65591e-111	2.50315e-231	1.63624e-47	4.50787e-127	1.93019e-17	1.17918e-65	1.06483e-140	7.58649e-190	3.84752e-37	1.66117e-42	2.34839e-103	1.0059e-88	8.30918e-109	5.85249e-171	2.30833e-88	7.43748e-124	1.49235e-06	9.56608e-29	6.97576e-123	1.48583e-13	5.39755e-134	3.18616e-202	4.32693e-54	7.04262e-118	9.50551e-30	1.80997e-77	8.38381e-122	3.42105e-210	8.3232e-32	3.16215e-61	2.91593e-97	1.5296e-77	2.11192e-70	3.33906e-190	2.00733e-89	6.74648e-108	6.99957e-05	3.39091e-33	2.22847e-122	4.99078e-12	2.66602e-128	8.75494e-210	1.17206e-47	2.36789e-118	3.84801e-28	1.81583e-69	8.9317e-133
28	8.47853e-121	4.75231e-12	3.4339e-110	6.12305e-230	1.10085e-46	6.50833e-126	6.8277e-17	1.00519e-64	1.67607e-139	1.55152e-188	2.1826e-36	1.03359e-41	2.85752e-102	1.08256e-87	1.05447e-107	1.09072e-169	2.47623e-87	1.05092e-122	3.16871e-06	4.5843e-28	9.79405e-122	4.56416e-13	8.15179e-133	6.89815e-201	3.19577e-53	9.55077e-117	4.65724e-29	1.75137e-76	1.16844e-120	7.67011e-209	4.25918e-31	2.55851e-60	3.3782e-96	1.48116e-76	1.89846e-69	6.84223e-189	2.17421e-88	8.5044e-107	0.0001294	1.78471e-32	3.11851e-121	1.43768e-11	3.88186e-127	1.95983e-208	7.90426e-47	3.22238e-117	1.81946e-27	1.61593e-68	1.33873e-131
29	1.14147e-119	1.34949e-11	4.28564e-109	1.44582e-228	7.14888e-46	9.07033e-125	2.33093e-16	8.27089e-64	2.54661e-138	3.06293e-187	1.19505e-35	6.20738e-41	3.3563e-101	1.1246e-86	1.29169e-106	1.96223e-168	2.56407e-86	1.43341e-121	6.49245e-06	2.12041e-27	1.32736e-120	1.35306e-12	1.18841e-131	1.44165e-199	2.27826e-52	1.25025e-115	2.20237e-28	1.63578e-75	1.5719e-119	1.66e-207	2.10365e-30	1.99815e-59	3.77784e-95	1.38442e-75	1.64728e-68	1.35342e-187	2.27317e-87	1.03481e-105	0.000230828	9.06632e-32	4.21251e-120	3.99683e-11	5.45595e-126	4.23496e-207	5.14515e-46	4.23297e-116	8.30335e-27	1.38807e-67	1.9369e-130
30	1.48518e-118	3.70263e-11	5.16909e-108	3.29947e-227	4.48635e-45	1.22166e-123	7.68924e-16	6.57678e-63	3.73945e-137	5.84382e-186	6.32318e-35	3.60253e-40	3.80978e-100	1.12904e-85	1.52917e-105	3.41163e-167	2.56587e-85	1.88949e-120	1.28519e-05	9.47742e-27	1.73854e-119	3.87576e-12	1.67437e-130	2.91185e-198	1.56957e-51	1.5817e-114	1.00641e-27	1.4765e-74	2.04369e-118	3.47212e-206	1.00403e-29	1.50808e-58	4.08289e-94	1.25053e-74	1.38131e-67	2.58732e-186	2.29682e-86	1.21688e-104	0.000397785	4.45066e-31	5.49929e-119	1.0736e-10	7.41094e-125	8.84421e-206	3.23653e-45	5.37383e-115	3.66173e-26	1.15228e-66	2.70829e-129
31	1.8696e-117	9.82682e-11	6.03204e-107	7.28515e-226	2.7238e-44	1.59196e-122	2.45368e-15	5.05956e-62	5.31264e-136	1.07875e-184	3.23669e-34	2.0227e-39	4.18399e-99	1.09664e-84	1.75147e-104	5.73899e-166	2.4842e-84	2.40975e-119	2.4606e-05	4.09795e-26	2.20311e-118	1.0739e-11	2.28241e-129	5.69038e-197	1.04614e-50	1.93601e-113	4.44909e-27	1.28939e-73	2.57074e-117	7.02661e-205	4.6359e-29	1.10117e-57	4.26915e-93	1.09285e-73	1.12061e-66	4.7855e-185	2.24526e-85	1.38448e-103	0.000662977	2.11364e-30	6.94585e-118	2.78948e-10	9.73937e-124	1.78703e-204	1.96964e-44	6.60048e-114	1.56215e-25	9.25424e-66	3.66385e-128
32	2.27943e-116	2.52539e-10	6.81741e-106	1.55794e-224	1.60154e-43	2.00919e-121	7.58203e-15	3.76967e-61	7.31008e-135	1.92866e-183	1.60449e-33	1.09984e-38	4.45024e-98	1.03162e-83	1.94292e-103	9.35022e-165	2.32936e-83	2.97651e-118	4.56124e-05	1.71594e-25	2.70393e-117	2.88127e-11	3.0133e-128	1.07703e-195	6.75275e-50	2.29506e-112	1.90469e-26	1.09051e-72	3.1319e-116	1.37725e-203	2.07292e-28	7.78704e-57	4.3233e-92	9.24968e-73	8.80457e-66	8.57272e-184	2.12572e-84	1.52556e-102	0.00106977	9.72078e-30	8.49669e-117	7.01802e-10	1.23964e-122	3.4972e-203	1.16084e-43	7.85186e-113	6.45382e-25	7.19807e-65	4.80051e-127
33	2.69422e-115	6.29045e-10	7.4697e-105	3.23001e-223	9.12863e-43	2.45834e-120	2.27096e-14	2.72276e-60	9.75142e-134	3.34296e-182	7.71025e-33	5.79734e-38	4.58885e-97	9.40803e-83	2.08947e-102	1.47688e-163	2.11744e-82	3.56429e-117	8.19437e-05	6.96502e-25	3.21724e-116	7.49286e-11	3.85678e-127	1.9763e-194	4.22553e-49	2.63761e-111	7.9043e-26	8.94122e-72	3.69904e-115	2.61709e-202	8.985e-28	5.3383e-56	4.24439e-91	7.58945e-72	6.70626e-65	1.48884e-182	1.95106e-83	1.62966e-101	0.00167281	4.33372e-29	1.00764e-115	1.71135e-09	1.52965e-121	6.6351e-202	6.63228e-43	9.05522e-112	2.58459e-24	5.4276e-64	6.09775e-126
34	3.09009e-114	1.5201e-09	7.94174e-104	6.49826e-222	5.04866e-42	2.91873e-119	6.5992e-14	1.90822e-59	1.26225e-132	5.62269e-181	3.59495e-32	2.96501e-37	4.59146e-96	8.32532e-82	2.18044e-101	2.26363e-162	1.8677e-81	4.14161e-116	0.000142804	2.74299e-24	3.71451e-115	1.89039e-10	4.79004e-126	3.51898e-193	2.5656e-48	2.94141e-110	3.18262e-25	7.11346e-71	4.23935e-114	4.82573e-201	3.77868e-27	3.55096e-55	4.04333e-90	6.04245e-71	4.95642e-64	2.50909e-181	1.73762e-82	1.68925e-100	0.00253728	1.8746e-28	1.15955e-114	4.0485e-09	1.83154e-120	1.22156e-200	3.67667e-42	1.01334e-110	1.00426e-23	3.97113e-63	7.51593e-125
35	3.44203e-113	3.56675e-09	8.20033e-103	1.26972e-220	2.7116e-41	3.36552e-118	1.86211e-13	1.29879e-58	1.58684e-131	9.18483e-180	1.62775e-31	1.47265e-36	4.46169e-95	7.15486e-81	2.20981e-100	3.36959e-161	1.59993e-80	4.67381e-115	0.000241617	1.04902e-23	4.16509e-114	4.63096e-10	5.77776e-125	6.08549e-192	1.51279e-47	3.18571e-109	1.24441e-24	5.49616e-70	4.71861e-113	8.64217e-200	1.5432e-26	2.2939e-54	3.74079e-89	4.67207e-70	3.55752e-63	4.10673e-180	1.50293e-81	1.70056e-99	0.00373621	7.87446e-28	1.29592e-113	9.29947e-09	2.12985e-119	2.18421e-199	1.97936e-41	1.10132e-109	3.78928e-23	2.8217e-62	8.99709e-124
36	3.72665e-112	8.13281e-09	8.23012e-102	2.41151e-219	1.41549e-40	3.77201e-117	5.10628e-13	8.59198e-58	1.93903e-130	1.45837e-178	7.16315e-31	7.10887e-36	4.2141e-94	5.9766e-80	2.17683e-99	4.87547e-160	1.33214e-79	5.12666e-114	0.000397226	3.89902e-23	4.5395e-113	1.10246e-09	6.77395e-124	1.02292e-190	8.66978e-47	3.35364e-108	4.72888e-24	4.12749e-69	5.10492e-112	1.50436e-198	6.12525e-26	1.44028e-53	3.36389e-88	3.51119e-69	2.48183e-62	6.53348e-179	1.2635e-80	1.66398e-98	0.0053455	3.21478e-27	1.40775e-112	2.07579e-08	2.40736e-118	3.79616e-198	1.03568e-40	1.1634e-108	1.38956e-22	1.94874e-61	1.04685e-122
37	3.9248e-111	1.80348e-08	8.03478e-101	4.45531e-218	7.18719e-40	4.11234e-116	1.36184e-12	5.52876e-57	2.3048e-129	2.2525e-177	3.06606e-30	3.33785e-35	3.87171e-93	4.85619e-79	2.08587e-98	6.8621e-159	1.07891e-78	5.47008e-113	0.000635044	1.40953e-22	4.81268e-112	2.55246e-09	7.72541e-123	1.67261e-189	4.83292e-46	3.43415e-107	1.74784e-23	3.01507e-68	5.37229e-111	2.54733e-197	2.3647e-25	8.79617e-53	2.94246e-87	2.56675e-68	1.68414e-61	1.01111e-177	1.03323e-79	1.58379e-97	0.00743662	1.27654e-26	1.48754e-111	4.50617e-08	2.64685e-117	6.41798e-197	5.27105e-40	1.19548e-107	4.95613e-22	1.30911e-60	1.18484e-121
38	4.02375e-110	3.89224e-08	7.63578e-100	8.01289e-217	3.5522e-39	4.36435e-115	3.53498e-12	3.46305e-56	2.66685e-128	3.38677e-176	1.27742e-29	1.52551e-34	3.46266e-92	3.84099e-78	1.94564e-97	9.40193e-158	8.50602e-78	5.68154e-112	0.000987968	4.95976e-22	4.96682e-111	5.75148e-09	8.57661e-122	2.66235e-188	2.62241e-45	3.42322e-106	6.28795e-23	2.14393e-67	5.50354e-110	4.19895e-196	8.88581e-25	5.22921e-52	2.50546e-86	1.82648e-67	1.11246e-60	1.52324e-176	8.22485e-79	1.46742e-96	0.0100672	4.93389e-26	1.53012e-110	9.5202e-08	2.83289e-116	1.05627e-195	2.61127e-39	1.19582e-106	1.72056e-21	8.56044e-60	1.30542e-120
39	4.01843e-109	8.18105e-08	7.06878e-99	1.40387e-215	1.7101e-38	4.51195e-114	8.93694e-12	2.11294e-55	3.00593e-127	4.96052e-175	5.184e-29	6.7912e-34	3.01667e-91	2.95936e-77	1.76785e-96	1.25487e-156	6.53242e-77	5.74848e-111	0.00149677	1.69986e-21	4.99325e-110	1.26219e-08	9.27524e-121	4.1282e-187	1.38606e-44	3.32402e-105	2.20336e-22	1.485e-66	5.4921e-109	6.74247e-195	3.25228e-24	3.02812e-51	2.07812e-85	1.26604e-66	7.15796e-60	2.23543e-175	6.37769e-78	1.32442e-95	0.0132707	1.85745e-25	1.53318e-109	1.95884e-07	2.95356e-115	1.69345e-194	1.26007e-38	1.1652e-105	5.81786e-21	5.45274e-59	1.40106e-119
40	3.91186e-108	1.67581e-07	6.37871e-98	2.39757e-214	8.02452e-38	4.54684e-113	2.20199e-11	1.25661e-54	3.30265e-126	7.08232e-174	2.05049e-28	2.94677e-33	2.56177e-90	2.22251e-76	1.56577e-95	1.63261e-155	4.89006e-76	5.66943e-110	0.00220967	5.67825e-21	4.89314e-109	2.69947e-08	9.77767e-120	6.23969e-186	7.14072e-44	3.14623e-104	7.52511e-22	1.0026e-65	5.34236e-108	1.05537e-193	1.1602e-23	1.7092e-50	1.68016e-84	8.554e-66	4.4893e-59	3.19788e-174	4.82048e-77	1.16517e-94	0.0170455	6.81554e-25	1.49748e-108	3.92785e-07	3.00165e-114	2.64653e-193	5.92661e-38	1.10671e-104	1.91737e-20	3.38546e-58	1.46576e-118
41	3.71432e-107	3.34746e-07	5.61424e-97	3.99393e-213	3.67249e-37	4.46917e-112	5.29102e-11	7.28901e-54	3.53933e-125	9.86288e-173	7.91018e-28	1.24706e-32	2.12188e-89	1.62799e-75	1.35263e-94	2.07179e-154	3.5704e-75	5.45378e-109	0.00318076	1.84987e-20	4.67694e-108	5.63008e-08	1.00535e-118	9.19908e-185	3.58797e-43	2.9046e-103	2.50648e-21	6.60222e-65	5.06872e-107	1.61128e-192	4.03653e-23	9.40941e-50	1.32493e-83	5.63702e-65	2.74616e-58	4.46212e-173	3.5537e-76	9.99822e-94	0.0213468	2.43901e-24	1.42659e-107	7.68039e-07	2.9754e-113	4.03425e-192	2.71871e-37	1.02527e-103	6.16265e-20	2.05011e-57	1.49569e-117
42	3.44196e-106	6.52444e-07	4.82254e-96	6.49334e-212	1.64023e-36	4.28721e-111	1.24056e-10	4.1262e-53	3.70178e-124	1.34051e-171	2.97788e-27	5.15019e-32	1.71525e-88	1.16381e-74	1.1404e-93	2.56593e-153	2.54415e-74	5.12018e-108	0.00446708	5.88096e-20	4.3628e-107	1.14575e-07	1.00886e-117	1.32362e-183	1.75939e-42	2.61704e-102	8.14702e-21	4.24297e-64	4.69345e-106	2.40092e-191	1.37046e-22	5.05526e-49	1.01967e-82	3.62533e-64	1.63941e-57	6.07654e-172	2.55678e-75	8.37301e-93	0.0260806	8.51754e-24	1.32637e-106	1.46535e-06	2.87847e-112	6.00186e-191	1.21708e-36	9.26979e-103	1.9329e-19	1.21157e-56	1.48953e-116
43	3.11464e-105	1.24152e-06	4.04515e-95	1.03091e-210	7.15315e-36	4.01604e-110	2.83988e-10	2.28082e-52	3.78076e-123	1.77917e-170	1.09463e-26	2.07685e-31	1.35396e-87	8.12426e-74	9.38871e-93	3.10332e-152	1.77025e-73	4.69406e-107	0.00612423	1.82551e-19	3.97415e-106	2.27641e-07	9.88601e-117	1.85981e-182	8.42422e-42	2.30255e-101	2.5856e-20	2.66265e-63	4.24387e-105	3.49354e-190	4.54317e-22	2.65205e-48	7.663e-82	2.27672e-63	9.55673e-57	8.08081e-171	1.79628e-74	6.8472e-92	0.0311037	2.90435e-23	1.20422e-105	2.72947e-06	2.71927e-111	8.71953e-190	5.32016e-36	8.18418e-102	5.91937e-19	6.99171e-56	1.44855e-115
44	2.75372e-104	2.30769e-06	3.31514e-94	1.59918e-209	3.04771e-35	3.67565e-109	6.35065e-10	1.23176e-51	3.77277e-122	2.3072e-169	3.93098e-26	8.18215e-31	1.04422e-86	5.54098e-73	7.55204e-92	3.66711e-151	1.20346e-72	4.20458e-106	0.00820068	5.53581e-19	3.53699e-105	4.41807e-07	9.46506e-116	2.55323e-181	3.94079e-41	1.97932e-100	8.01656e-20	1.63252e-62	3.74922e-104	4.96678e-189	1.47135e-21	1.35929e-47	5.62653e-81	1.39692e-62	5.44288e-56	1.04996e-169	1.23298e-73	5.47082e-91	0.0362286	9.675e-23	1.06821e-104	4.96623e-06	2.50989e-110	1.23771e-188	2.27202e-35	7.05975e-101	1.77094e-18	3.94196e-55	1.37635e-114
45	2.37995e-103	4.19222e-06	2.65584e-93	2.42505e-208	1.26928e-34	3.28855e-108	1.38802e-09	6.50251e-51	3.68028e-121	2.92479e-168	1.37986e-25	3.15089e-30	7.8724e-86	3.69417e-72	5.9382e-91	4.23606e-150	7.99753e-72	3.68157e-105	0.0107311	1.64084e-18	3.07721e-104	8.38029e-07	8.85854e-115	3.42654e-180	1.80198e-40	1.66325e-99	2.42942e-19	9.78416e-62	3.23783e-103	6.90284e-188	4.65763e-21	6.81017e-47	4.03843e-80	8.37831e-62	3.03018e-55	1.33362e-168	8.27305e-73	4.2729e-90	0.0412344	3.15026e-22	9.26278e-104	8.83105e-06	2.2646e-109	1.71747e-187	9.48435e-35	5.95301e-100	5.17863e-18	2.17251e-54	1.27838e-113
46	2.01171e-102	7.44673e-06	2.0809e-92	3.59668e-207	5.1697e-34	2.87757e-107	2.96655e-09	3.35714e-50	3.51117e-120	3.62629e-167	4.73673e-25	1.18663e-29	5.80456e-85	2.40874e-71	4.5666e-90	4.78583e-149	5.19782e-71	3.15277e-104	0.0137292	4.75611e-18	2.61837e-103	1.55434e-06	8.1087e-114	4.49758e-179	8.05829e-40	1.36694e-98	7.19978e-19	5.73492e-61	2.73475e-102	9.38293e-187	1.44184e-20	3.33684e-46	2.83484e-79	4.9145e-61	1.64984e-54	1.65671e-167	5.42897e-72	3.26392e-89	0.045883	1.00311e-21	7.85552e-103	1.53549e-05	1.99838e-108	2.33087e-186	3.8719e-34	4.90944e-99	1.4809e-17	1.17097e-53	1.1613e-112
47	1.66386e-101	1.29404e-05	1.59533e-91	5.21973e-206	2.06016e-33	2.46379e-106	6.20278e-09	1.69589e-49	3.2778e-119	4.3994e-166	1.5909e-24	4.37245e-29	4.18777e-84	1.53677e-70	3.43624e-89	5.29069e-148	3.30548e-70	2.64184e-103	0.0171815	1.34879e-17	2.18001e-102	2.82031e-06	7.26268e-113	5.77651e-178	3.52588e-39	1.09924e-97	2.08758e-18	3.28908e-60	2.26013e-101	1.248e-185	4.367e-20	1.59974e-45	1.94712e-78	2.82062e-60	8.78936e-54	2.01384e-166	3.48591e-71	2.43954e-88	0.049938	3.12511e-21	6.51872e-102	2.6118e-05	1.72552e-107	3.09535e-185	1.54656e-33	3.96169e-98	4.14325e-17	6.17542e-53	1.03224e-111
48	1.34716e-100	2.20084e-05	1.19729e-90	7.41579e-205	8.03637e-33	2.06506e-105	1.2694e-08	8.38608e-49	2.99547e-118	5.22496e-165	5.23023e-24	1.57708e-28	2.95763e-83	9.59783e-70	2.53117e-88	5.72566e-147	2.05774e-69	2.16707e-102	0.021042	3.74405e-17	1.77679e-101	5.00852e-06	6.36788e-112	7.26293e-177	1.51015e-38	8.65338e-97	5.92479e-18	1.84655e-59	1.82853e-100	1.62498e-184	1.29466e-19	7.50747e-45	1.30919e-77	1.58471e-59	4.58362e-53	2.39641e-165	2.19108e-70	1.78495e-87	0.0531858	9.52994e-21	5.29541e-101	4.34796e-05	1.45852e-106	4.02402e-184	6.04691e-33	3.12953e-97	1.13464e-16	3.18805e-52	8.98196e-111
49	1.06822e-99	3.66499e-05	8.80012e-90	1.03185e-203	3.06996e-32	1.69513e-104	2.54377e-08	4.06112e-48	2.68097e-117	6.07743e-164	1.68384e-23	5.57043e-28	2.0457e-82	5.87042e-69	1.82599e-87	6.06855e-146	1.25453e-68	1.74092e-101	0.0252298	1.01772e-16	1.41825e-100	8.70908e-06	5.46808e-111	8.94347e-176	6.33419e-38	6.67141e-96	1.64662e-17	1.01526e-58	1.4488e-99	2.0722e-183	3.75858e-19	3.45033e-44	8.6208e-77	8.71935e-59	2.34092e-52	2.79284e-164	1.34875e-69	1.27902e-86	0.0554541	2.84586e-20	4.21286e-100	7.08716e-05	1.20739e-105	5.12342e-183	2.31532e-32	2.42112e-96	3.04273e-16	1.61179e-51	7.65423e-110
50	8.299e-99	5.9784e-05	6.33717e-89	1.40672e-202	1.14894e-31	1.36331e-103	4.99347e-08	1.9268e-47	2.35094e-116	6.92605e-163	5.31089e-23	1.92759e-27	1.38629e-81	3.51786e-68	1.2906e-86	6.30189e-145	7.49347e-68	1.37027e-100	0.0296293	2.71014e-16	1.10915e-99	1.48342e-05	4.60041e-110	1.07902e-174	2.60291e-37	5.03929e-95	4.48322e-17	5.46892e-58	1.1247e-98	2.58908e-182	1.06898e-18	1.55356e-43	5.56169e-76	4.70031e-58	1.1713e-51	3.18903e-163	8.13429e-69	8.97944e-86	0.0566273	8.32557e-20	3.28377e-99	0.000113157	9.79265e-105	6.3913e-182	8.68527e-32	1.83515e-95	7.99355e-16	7.98355e-51	6.39078e-109
51	6.31952e-98	9.55646e-05	4.47296e-88	1.87977e-201	4.21437e-31	1.07469e-102	9.60613e-08	8.95997e-47	2.02064e-115	7.73667e-162	1.64169e-22	6.53739e-27	9.20791e-81	2.06621e-67	8.94088e-86	6.41443e-144	4.38705e-67	1.05713e-99	0.0340943	7.07292e-16	8.50205e-99	2.47607e-05	3.79362e-109	1.27602e-173	1.04833e-36	3.73091e-94	1.19628e-16	2.88741e-57	8.55768e-98	3.17075e-181	2.97964e-18	6.85605e-43	3.51686e-75	2.48343e-57	5.74426e-51	3.56921e-162	4.80832e-68	6.17891e-85	0.056656	2.38709e-19	2.50879e-98	0.000177046	7.78483e-104	7.81486e-181	3.19316e-31	1.36339e-94	2.05807e-15	3.87582e-50	5.22999e-108
52	4.7185e-97	0.000149753	3.09566e-87	2.46305e-200	1.51566e-30	8.30674e-102	1.81168e-07	4.08528e-46	1.70295e-114	8.47407e-161	4.97553e-22	2.17382e-26	5.99686e-80	1.18994e-66	6.07332e-85	6.40196e-143	2.51835e-66	7.99674e-99	0.0384558	1.80976e-15	6.39024e-98	4.05166e-05	3.06743e-108	1.47963e-172	4.13978e-36	2.70844e-93	3.1296e-16	1.49474e-56	6.38467e-97	3.80758e-180	8.14284e-18	2.96662e-42	2.18052e-74	1.28656e-56	2.76213e-50	3.91702e-161	2.7869e-67	4.169e-84	0.0555598	6.71029e-19	1.87938e-97	0.000271552	6.06819e-103	9.36965e-180	1.15105e-30	9.93185e-94	5.19508e-15	1.84492e-49	4.19673e-107
53	3.45577e-96	0.000230135	2.10152e-86	3.16573e-199	5.34644e-30	6.29801e-101	3.35091e-07	1.82702e-45	1.40779e-113	9.10458e-160	1.47902e-21	7.08982e-26	3.83094e-79	6.7219e-66	4.04661e-84	6.26753e-142	1.41799e-65	5.93362e-98	0.0425329	4.54167e-15	4.7112e-97	6.5018e-05	2.43286e-107	1.68298e-171	1.60345e-35	1.92861e-92	8.03011e-16	7.58986e-56	4.67242e-96	4.48504e-179	2.18256e-17	1.25908e-41	1.32611e-73	6.53754e-56	1.30276e-49	4.21666e-160	1.5844e-66	2.75913e-83	0.0534233	1.8501e-18	1.38098e-96	0.000408454	4.63972e-102	1.10194e-178	4.06966e-30	7.09675e-93	1.28616e-14	8.61388e-49	3.30327e-106
54	2.4835e-95	0.000346955	1.39987e-85	3.99266e-198	1.85045e-29	4.68547e-100	6.08059e-07	8.01726e-45	1.14197e-112	9.59871e-159	4.31367e-21	2.26878e-25	2.40138e-78	3.72586e-65	2.64564e-83	6.02092e-141	7.83432e-65	4.3202e-97	0.0461448	1.11825e-14	3.40819e-96	0.000102358	1.89339e-106	1.87841e-170	6.09378e-35	1.34756e-91	2.02155e-15	3.78152e-55	3.35522e-95	5.18407e-178	5.73971e-17	5.24325e-41	7.91357e-73	3.25961e-55	6.02899e-49	4.45416e-159	8.83842e-66	1.79178e-82	0.0503861	5.00474e-18	9.95716e-96	0.000602715	3.48098e-101	1.27167e-177	1.4118e-29	4.97582e-92	3.1241e-14	3.94622e-48	2.55126e-105
55	1.7519e-94	0.000513327	9.15301e-85	4.94297e-197	6.28623e-29	3.4216e-99	1.08288e-06	3.45317e-44	9.09282e-112	9.93342e-158	1.23484e-20	7.12595e-25	1.47753e-77	2.02712e-64	1.69783e-82	5.67755e-140	4.24861e-64	3.08754e-96	0.0491254	2.70235e-14	2.42014e-95	0.000158141	1.4464e-105	2.05796e-169	2.27311e-34	9.24215e-91	4.99487e-15	1.84932e-54	2.36497e-94	5.88178e-177	1.48148e-16	2.14317e-40	4.63537e-72	1.59526e-54	2.73865e-48	4.61845e-158	4.83954e-65	1.14214e-81	0.0466283	1.32878e-17	7.04707e-95	0.000872786	2.56352e-100	1.44055e-176	4.80712e-29	3.42447e-91	7.44785e-14	1.77449e-47	1.93415e-104
56	1.21345e-93	0.000745572	5.87636e-84	6.00887e-196	2.09674e-28	2.45344e-98	1.89327e-06	1.46037e-43	7.10912e-111	1.0094e-156	3.47061e-20	2.19751e-24	8.92646e-77	1.08292e-63	1.06985e-81	5.25697e-139	2.26232e-63	2.16667e-95	0.0513355	6.41156e-14	1.68743e-94	0.000239854	1.08495e-104	2.21392e-168	8.32533e-34	6.22396e-90	1.21168e-14	8.88009e-54	1.63682e-93	6.55278e-176	3.75427e-16	8.60127e-40	2.666e-71	7.66575e-54	1.22147e-47	4.70222e-157	2.60192e-64	7.14861e-81	0.0423535	3.46379e-17	4.89723e-94	0.00124072	1.85371e-99	1.60235e-175	1.60708e-28	2.31414e-90	1.74323e-13	7.83468e-47	1.43979e-103
57	8.25549e-93	0.00106341	3.70561e-83	7.17491e-195	6.86879e-28	1.72795e-97	3.25069e-06	6.06598e-43	5.45938e-110	1.00749e-155	9.58017e-20	6.65576e-24	5.29695e-76	5.68212e-63	6.62154e-81	4.78105e-138	1.18321e-62	1.49341e-94	0.0526739	1.49399e-13	1.15563e-93	0.000357246	7.99351e-104	2.33938e-167	2.99479e-33	4.11687e-89	2.88675e-14	4.18811e-53	1.11271e-92	7.17066e-175	9.34372e-16	3.39045e-39	1.50604e-70	3.61805e-53	5.35087e-47	4.70246e-156	1.374e-63	4.39468e-80	0.0377721	8.86779e-17	3.34271e-93	0.00173201	1.3166e-98	1.75067e-174	5.27681e-28	1.53601e-89	4.00715e-13	3.39751e-46	1.05272e-102
58	5.51831e-92	0.00148989	2.29588e-82	8.41768e-194	2.2107e-27	1.19572e-96	5.48285e-06	2.47551e-42	4.11922e-109	9.8803e-155	2.59803e-19	1.98049e-23	3.08823e-75	2.92927e-62	4.02655e-80	4.27227e-137	6.07999e-62	1.01137e-93	0.0530852	3.41997e-13	7.77594e-93	0.000522684	5.78641e-103	2.42879e-166	1.0584e-32	2.67552e-88	6.75658e-14	1.94066e-52	7.43194e-92	7.70979e-174	2.2846e-15	1.31303e-38	8.35893e-70	1.67773e-52	2.30299e-46	4.62058e-155	7.12869e-63	2.65443e-79	0.0330846	2.23038e-16	2.24176e-92	0.00237502	9.18774e-98	1.87932e-173	1.70223e-27	1.0017e-88	9.04916e-13	1.44752e-45	7.56261e-102
59	3.62526e-91	0.0020511	1.398e-81	9.7062e-193	6.99236e-27	8.13201e-96	9.08728e-06	9.92845e-42	3.05464e-108	9.52307e-154	6.92389e-19	5.79147e-23	1.76954e-74	1.48413e-61	2.40644e-79	3.75207e-136	3.07049e-61	6.73146e-93	0.0525632	7.69345e-13	5.1423e-92	0.000751434	4.11674e-102	2.47833e-165	3.67606e-32	1.70891e-87	1.55406e-13	8.83767e-52	4.87859e-91	8.14715e-173	5.48945e-15	4.99742e-38	4.55963e-69	7.64595e-52	9.74126e-46	4.46216e-154	3.63493e-62	1.57574e-78	0.0284698	5.51278e-16	1.47757e-91	0.00320005	6.30135e-97	1.98279e-172	5.39644e-27	6.42019e-88	2.00817e-12	6.06104e-45	5.33951e-101
60	2.34136e-90	0.00277537	8.36874e-81	1.1003e-191	2.17413e-26	5.43705e-95	1.48041e-05	3.91452e-41	2.22692e-107	9.02375e-153	1.8139e-18	1.66482e-22	9.96791e-74	7.39219e-61	1.41387e-78	3.23956e-135	1.5244e-60	4.40459e-92	0.0511497	1.70124e-12	3.34316e-91	0.00106181	2.87934e-101	2.48617e-164	1.25512e-31	1.07306e-86	3.51364e-13	3.9565e-51	3.14833e-90	8.46395e-172	1.29658e-14	1.86979e-37	2.4451e-68	3.42549e-51	4.0506e-45	4.2364e-153	1.8221e-61	9.19576e-78	0.0240753	1.33942e-15	9.57415e-91	0.00423782	4.24868e-96	2.05663e-171	1.68176e-26	4.04532e-87	4.38065e-12	2.49487e-44	3.70618e-100
61	1.487e-89	0.00369211	4.92636e-80	1.2266e-190	6.64717e-26	3.57474e-94	2.37122e-05	1.51766e-40	1.59649e-106	8.40856e-152	4.67259e-18	4.70579e-22	5.52153e-73	3.62061e-60	8.16881e-78	2.75056e-134	7.44219e-60	2.83411e-91	0.0489305	3.69897e-12	2.13733e-90	0.00147513	1.98039e-100	2.4526e-163	4.2139e-31	6.62584e-86	7.81114e-13	1.74176e-50	1.99794e-89	8.64699e-171	3.01119e-14	6.87916e-37	1.28936e-67	1.5091e-50	1.65625e-44	3.95524e-152	8.98161e-61	5.2772e-77	0.0200127	3.19988e-15	6.10055e-90	0.00551753	2.81702e-95	2.09778e-170	5.15358e-26	2.50653e-86	9.39596e-12	1.00983e-43	2.5297e-99
62	9.28944e-89	0.00483022	2.85248e-79	1.34504e-189	1.99891e-25	2.31185e-93	3.73526e-05	5.78747e-40	1.12581e-105	7.70719e-151	1.18385e-17	1.30827e-21	3.00845e-72	1.74428e-59	4.64234e-77	2.29719e-133	3.57377e-59	1.79375e-90	0.0460264	7.91004e-12	1.34406e-89	0.00201537	1.33981e-99	2.37993e-162	1.39152e-30	4.02431e-85	1.70788e-12	7.542e-50	1.24714e-88	8.68958e-170	6.87809e-14	2.48939e-36	6.68776e-67	6.53938e-50	6.66117e-44	3.63235e-151	4.35474e-60	2.97886e-76	0.0163571	7.5187e-15	3.82357e-89	0.0070645	1.83721e-94	2.10477e-169	1.55331e-25	1.52765e-85	1.9821e-11	4.02039e-43	1.69842e-98
63	5.70969e-88	0.00621599	1.62504e-78	1.45119e-188	5.91383e-25	1.47103e-92	5.78817e-05	2.17136e-39	7.81106e-105	6.95064e-150	2.95084e-17	3.57831e-21	1.61276e-71	8.26778e-59	2.59573e-76	1.88766e-132	1.68846e-58	1.117e-89	0.0425833	1.66408e-11	8.31594e-89	0.00270853	8.91829e-99	2.27225e-161	4.52085e-30	2.40484e-84	3.67366e-12	3.21306e-49	7.65941e-88	8.59186e-169	1.54561e-13	8.86292e-36	3.41292e-66	2.78797e-49	2.63576e-43	3.28213e-150	2.07734e-59	1.65439e-75	0.0131487	1.73802e-14	2.35784e-88	0.00889743	1.17889e-93	2.0778e-168	4.60601e-25	9.1605e-85	4.11345e-11	1.57477e-42	1.12193e-97
64	3.45375e-87	0.00787072	9.1108e-78	1.54092e-187	1.72176e-24	9.21171e-92	8.82555e-05	8.01704e-39	5.33352e-104	6.16902e-149	7.23789e-17	9.63123e-21	8.50838e-71	3.85664e-58	1.42835e-75	1.52656e-131	7.85059e-58	6.84541e-89	0.03876	3.4449e-11	5.06359e-88	0.00358161	5.84221e-98	2.13507e-160	1.44538e-29	1.41428e-83	7.77586e-12	1.34708e-48	4.62944e-87	8.36064e-168	3.41775e-13	3.10526e-35	1.71404e-65	1.16972e-48	1.02637e-42	2.91869e-149	9.75215e-59	9.04229e-75	0.010398	3.95349e-14	1.43091e-87	0.0110256	7.44467e-93	2.01868e-167	1.34406e-24	5.4059e-84	8.40023e-11	6.07025e-42	7.29365e-97
65	2.0565e-86	0.00980809	5.02816e-77	1.61067e-186	4.93412e-24	5.67832e-91	0.000132443	2.91368e-38	3.58494e-103	5.38984e-148	1.74744e-16	2.55162e-20	4.41857e-70	1.77086e-57	7.73689e-75	1.21526e-130	3.59308e-57	4.12959e-88	0.0347176	7.01927e-11	3.03505e-87	0.00466115	3.76734e-97	1.97486e-159	4.54864e-29	8.18733e-83	1.61999e-11	5.5593e-48	2.75437e-86	8.0087e-167	7.43874e-13	1.07093e-34	8.47365e-65	4.83088e-48	3.93409e-42	2.55498e-148	4.50657e-58	4.86493e-74	0.00809109	8.85165e-14	8.54817e-87	0.0134464	4.62782e-92	1.93064e-166	3.86052e-24	3.14034e-83	1.68844e-10	2.30325e-41	4.66751e-96
66	1.20568e-85	0.0120316	2.73227e-76	1.65771e-185	1.39214e-23	3.44639e-90	0.000195662	1.0426e-37	2.37256e-102	4.63669e-147	4.15357e-16	6.65551e-20	2.25932e-69	8.00596e-57	4.1263e-74	9.52566e-130	1.61916e-56	2.4529e-87	0.0306081	1.40807e-10	1.79117e-86	0.00597148	2.39198e-96	1.79859e-158	1.40936e-28	4.66674e-82	3.3227e-11	2.2589e-47	1.61354e-85	7.55365e-166	1.59396e-12	3.63637e-34	4.12457e-64	1.96437e-47	1.48469e-41	2.20221e-147	2.05045e-57	2.57712e-73	0.00619671	1.95115e-13	5.02801e-86	0.0161425	2.83252e-91	1.81805e-165	1.09171e-23	1.79617e-82	3.34114e-10	8.60448e-41	2.94096e-95
67	6.96144e-85	0.0145322	1.46218e-75	1.68029e-184	3.86808e-23	2.06003e-89	0.000284624	3.674e-37	1.54639e-101	3.92837e-146	9.72224e-16	1.70954e-19	1.13771e-68	3.56451e-56	2.16729e-73	7.35345e-129	7.18565e-56	1.43488e-86	0.0265672	2.78144e-10	1.04105e-85	0.00753258	1.4957e-95	1.61325e-157	4.30035e-28	2.61967e-81	6.71101e-11	9.03913e-47	9.30895e-85	7.01657e-165	3.36338e-12	1.21596e-33	1.97718e-63	7.86631e-47	5.51796e-41	1.86939e-146	9.1877e-57	1.34448e-72	0.00467209	4.23523e-13	2.9126e-85	0.019081	1.70739e-90	1.6861e-164	3.04023e-23	1.01176e-81	6.51053e-10	3.1656e-40	1.82498e-94
68	3.95937e-84	0.0172865	7.70787e-75	1.67776e-183	1.05862e-22	1.21295e-88	0.000407778	1.27528e-36	9.92849e-101	3.27857e-145	2.24148e-15	4.32522e-19	5.64344e-68	1.56329e-55	1.12132e-72	5.59183e-128	3.14121e-55	8.26821e-86	0.0227077	5.41164e-10	5.96028e-85	0.00935782	9.21288e-95	1.4254e-156	1.29248e-27	1.44857e-80	1.33505e-10	3.56291e-46	5.29031e-84	6.42039e-164	6.9902e-12	4.00511e-33	9.33611e-63	3.1029e-46	2.02007e-40	1.56318e-145	4.05525e-56	6.90925e-72	0.00346859	9.05487e-13	1.66198e-84	0.0222122	1.0138e-89	1.54038e-163	8.33945e-23	5.61398e-81	1.24953e-09	1.14718e-39	1.11555e-93
69	2.21874e-83	0.0202553	4.00333e-74	1.6506e-182	2.85437e-22	7.03669e-88	0.000575513	4.36127e-36	6.28065e-100	2.69599e-144	5.09121e-15	1.0781e-18	2.75808e-67	6.755e-55	5.71603e-72	4.18964e-127	1.35293e-54	4.69421e-85	0.0191167	1.03727e-09	3.36213e-84	0.0114517	5.59114e-94	1.2409e-155	3.82712e-27	7.89194e-80	2.61646e-10	1.38365e-45	2.9622e-83	5.78844e-163	1.43124e-11	1.2997e-32	4.34346e-62	1.20589e-45	7.28606e-40	1.2879e-144	1.7635e-55	3.49831e-71	0.00253618	1.90721e-12	9.34382e-84	0.0254705	5.93097e-89	1.38656e-162	2.25369e-22	3.06913e-80	2.36256e-09	4.0959e-39	6.71854e-93
70	1.22528e-82	0.0233842	2.04904e-73	1.60034e-181	7.58405e-22	4.02291e-87	0.000800309	1.46976e-35	3.91538e-99	2.18477e-143	1.1395e-14	2.64803e-18	1.32834e-66	2.8764e-54	2.87146e-71	3.09351e-126	5.74234e-54	2.62639e-84	0.0158546	1.9591e-09	1.869e-83	0.0138076	3.34389e-93	1.06461e-154	1.11672e-26	4.23714e-79	5.05275e-10	5.29516e-45	1.63453e-82	5.14299e-162	2.88761e-11	4.15624e-32	1.99134e-61	4.61829e-45	2.58971e-39	1.0457e-143	7.55734e-55	1.74553e-70	0.00182678	3.9584e-12	5.17687e-83	0.028776	3.41936e-88	1.22999e-161	6.00162e-22	1.65349e-79	4.40163e-09	1.4411e-38	3.98755e-92
71	6.66952e-82	0.0266039	1.03375e-72	1.52941e-180	1.98609e-21	2.26697e-86	0.00109678	4.88203e-35	2.40592e-98	1.74516e-142	2.51367e-14	6.41049e-18	6.30587e-66	1.20726e-53	1.42181e-70	2.25147e-125	2.40232e-53	1.44841e-83	0.0129566	3.64673e-09	1.02408e-82	0.0164064	1.97124e-92	9.00301e-154	3.21165e-26	2.24231e-78	9.61676e-10	1.99736e-44	8.89008e-82	4.50415e-161	5.74187e-11	1.31e-31	8.99875e-61	1.74332e-44	9.07254e-39	8.36895e-143	3.1922e-54	8.58475e-70	0.00129645	8.09713e-12	2.82712e-82	0.0320374	1.94312e-87	1.07549e-160	1.57525e-21	8.78058e-79	8.08214e-09	4.99758e-38	2.33278e-91
72	3.57911e-81	0.0298328	5.14155e-72	1.44101e-179	5.12729e-21	1.25943e-85	0.00148159	1.59867e-34	1.45751e-97	1.37434e-141	5.46618e-14	1.52985e-17	2.95118e-65	4.99533e-53	6.94065e-70	1.61551e-124	9.90797e-53	7.87486e-83	0.0104353	6.6915e-09	5.532e-82	0.0192148	1.14564e-91	7.50606e-153	9.10562e-26	1.16987e-77	1.80428e-09	7.42748e-44	4.76692e-81	3.88902e-160	1.1255e-10	4.07048e-31	4.00898e-60	6.48756e-44	3.13338e-38	6.60335e-142	1.3293e-53	4.16241e-69	0.000906732	1.63276e-11	1.52209e-81	0.0351565	1.08861e-86	9.27132e-160	4.07587e-21	4.59687e-78	1.46288e-08	1.70856e-37	1.34543e-90
73	1.89391e-80	0.03298	2.5216e-71	1.33883e-178	1.30514e-20	6.89932e-85	0.00197317	5.16183e-34	8.70658e-97	1.06724e-140	1.172e-13	3.59979e-17	1.36191e-64	2.0381e-52	3.34087e-69	1.14304e-123	4.02935e-52	4.22181e-82	0.00828479	1.2106e-08	2.94668e-81	0.0221856	6.56544e-91	6.17091e-152	2.54549e-25	6.01839e-77	3.33759e-09	2.72345e-43	2.52042e-80	3.31115e-159	2.17518e-10	1.24711e-30	1.7611e-59	2.38056e-43	1.06705e-37	5.13771e-141	5.45825e-53	1.99005e-68	0.000625082	3.24618e-11	8.08049e-81	0.0380328	6.01384e-86	7.88113e-159	1.03985e-20	2.37303e-77	2.61063e-08	5.75953e-37	7.65161e-90
74	9.88395e-80	0.03595	1.21967e-70	1.22682e-177	3.27628e-20	3.72757e-84	0.00259127	1.64368e-33	5.12947e-96	8.17383e-140	2.4781e-13	8.35336e-17	6.19841e-64	8.20092e-52	1.58599e-68	7.97636e-123	1.61608e-51	2.23224e-81	0.00648486	2.15979e-08	1.54799e-80	0.0252582	3.71078e-90	5.00357e-151	7.01771e-25	3.05358e-76	6.08839e-09	9.84851e-43	1.3143e-79	2.78044e-158	4.1456e-10	3.76815e-30	7.62983e-59	8.61487e-43	3.58368e-37	3.94246e-140	2.21035e-52	9.38348e-68	0.000424826	6.36454e-11	4.23079e-80	0.0405692	3.27655e-85	6.60739e-158	2.61622e-20	1.20817e-76	4.59428e-08	1.91477e-36	4.29172e-89
75	5.08821e-79	0.0386471	5.81932e-70	1.10895e-176	8.11231e-20	1.9866e-83	0.00335623	5.16276e-33	2.98102e-95	6.17535e-139	5.16818e-13	1.91196e-16	2.78275e-63	3.25506e-51	7.42686e-68	5.4906e-122	6.39366e-51	1.16425e-80	0.00500544	3.80051e-08	8.02174e-80	0.0283601	2.06887e-89	4.00207e-150	1.90837e-24	1.52827e-75	1.09544e-08	3.51298e-42	6.76048e-79	2.30314e-157	7.79292e-10	1.12305e-29	3.26065e-58	3.07519e-42	1.1872e-36	2.98427e-139	8.82928e-52	4.36441e-67	0.000284697	1.23079e-10	2.18509e-79	0.0426777	1.76094e-84	5.46442e-157	6.49258e-20	6.06762e-76	7.97449e-08	6.27905e-36	2.37452e-88
76	2.5843e-78	0.0409809	2.73931e-69	9.88995e-176	1.98163e-19	1.04457e-82	0.00428803	1.59982e-32	1.70924e-94	4.60307e-138	1.06332e-12	4.31724e-16	1.23256e-62	1.27464e-50	3.43122e-67	3.72892e-121	2.49557e-50	5.99097e-80	0.00381051	6.59728e-08	4.10119e-79	0.0314097	1.138e-88	3.15819e-149	5.11973e-24	7.54628e-75	1.94433e-08	1.23626e-41	3.43086e-78	1.88226e-156	1.44514e-09	3.30213e-29	1.37477e-57	1.083e-41	3.88013e-36	2.22873e-138	3.47955e-51	2.00275e-66	0.00018816	2.34802e-10	1.11341e-78	0.044284	9.33719e-84	4.45871e-156	1.58955e-19	3.0064e-75	1.36546e-07	2.03141e-35	1.29617e-87
77	1.2952e-77	0.0428714	1.2724e-68	8.70372e-175	4.7763e-19	5.41978e-82	0.00540513	4.89173e-32	9.67076e-94	3.38578e-137	2.15857e-12	9.61877e-16	5.38708e-62	4.92525e-50	1.56425e-66	2.49902e-120	9.61169e-50	3.04203e-79	0.00286154	1.12994e-07	2.06904e-78	0.0343199	6.17693e-88	2.45934e-148	1.35527e-23	3.67689e-74	3.40502e-08	4.2929e-41	1.71809e-77	1.51797e-155	2.6442e-09	9.58045e-29	5.71962e-57	3.76345e-41	1.25133e-35	1.64249e-137	1.35311e-50	9.06862e-66	0.000122664	4.4197e-10	5.59837e-78	0.0453327	4.88545e-83	3.59005e-155	3.83989e-19	1.46992e-74	2.30687e-07	6.48492e-35	6.98182e-87
78	6.40651e-77	0.0442537	5.83308e-68	7.55991e-174	1.13612e-18	2.77535e-81	0.00672311	1.47614e-31	5.40022e-93	2.45792e-136	4.3244e-12	2.11491e-15	2.32373e-61	1.87824e-49	7.03807e-66	1.65292e-119	3.65353e-49	1.52448e-78	0.00212013	1.90981e-07	1.03019e-77	0.0370023	3.30898e-87	1.89015e-147	3.54057e-23	1.76815e-73	5.88456e-08	1.47119e-40	8.49138e-77	1.20822e-154	4.77444e-09	2.74315e-28	2.34849e-56	1.2907e-40	3.98264e-35	1.19466e-136	5.19304e-50	4.05269e-65	7.88918e-05	8.2098e-10	2.77815e-77	0.0457895	2.52281e-82	2.85292e-154	9.15433e-19	7.09293e-74	3.84597e-07	2.04308e-34	3.71163e-86
79	3.12801e-76	0.0450815	2.63955e-67	6.48188e-173	2.66741e-18	1.40287e-80	0.00825318	4.39681e-31	2.97664e-92	1.76135e-135	8.55085e-12	4.58982e-15	9.89413e-61	7.07015e-49	3.12579e-65	1.0792e-118	1.37082e-48	7.54122e-78	0.00155005	3.18595e-07	5.06323e-77	0.0393714	1.74976e-86	1.43399e-146	9.12974e-23	8.39298e-73	1.00374e-07	4.97667e-40	4.14259e-76	9.49296e-154	8.50882e-09	7.75277e-28	9.51847e-56	4.36931e-40	1.25118e-34	8.57739e-136	1.96728e-49	1.78774e-64	5.00655e-05	1.50519e-09	1.36085e-76	0.045644	1.28595e-81	2.23795e-153	2.15411e-18	3.37847e-73	6.32848e-07	6.35351e-34	1.94771e-85
80	1.50781e-75	0.0453297	1.17921e-66	5.48691e-172	6.18246e-18	7.00082e-80	0.0100007	1.2929e-30	1.61986e-91	1.24613e-134	1.66912e-11	9.83328e-15	4.15907e-60	2.62742e-48	1.37055e-64	6.95653e-118	5.07774e-48	3.68292e-77	0.00111846	5.24649e-07	2.45679e-76	0.0413499	9.13472e-86	1.07408e-145	2.32409e-22	3.93319e-72	1.69011e-07	1.66199e-39	1.99525e-75	7.36371e-153	1.49694e-08	2.1631e-27	3.80865e-55	1.46023e-39	3.88047e-34	6.08002e-135	7.35757e-49	7.78559e-64	3.1355e-05	2.7242e-09	6.58107e-76	0.0449089	6.47138e-81	1.73321e-152	5.00395e-18	1.58871e-72	1.02796e-06	1.95055e-33	1.00906e-84
81	7.17667e-75	0.0449957	5.20177e-66	4.58632e-171	1.41483e-17	3.44969e-79	0.0119636	3.75382e-30	8.70418e-91	8.70543e-134	3.21683e-11	2.08003e-14	1.72628e-59	9.64102e-48	5.93369e-64	4.42779e-117	1.85718e-47	1.776e-76	0.000796614	8.53003e-07	1.17708e-75	0.0428722	4.70883e-85	7.94385e-145	5.84148e-22	1.82e-71	2.80969e-07	5.4803e-39	9.48897e-75	5.64026e-152	2.60011e-08	5.95903e-27	1.50476e-54	4.81856e-39	1.18832e-33	4.25561e-134	2.71703e-48	3.34793e-63	1.93823e-05	4.86793e-09	3.14254e-75	0.0436195	3.21565e-80	1.32543e-151	1.1477e-17	7.37674e-72	1.64853e-06	5.9127e-33	5.16186e-84
82	3.37338e-74	0.0440991	2.26607e-65	3.78596e-170	3.19732e-17	1.67872e-78	0.0141314	1.0763e-29	4.619e-90	6.00605e-133	6.12205e-11	4.34485e-14	7.07597e-59	3.4936e-47	2.53699e-63	2.78326e-116	6.70801e-47	8.45786e-76	0.000560143	1.36946e-06	5.56945e-75	0.0438886	2.39716e-84	5.80231e-144	1.44989e-21	8.31688e-71	4.61232e-07	1.78457e-38	4.45663e-74	4.26655e-151	4.45966e-08	1.62115e-26	5.87117e-54	1.57024e-38	3.59363e-33	2.94165e-133	9.90857e-48	1.42175e-62	1.18277e-05	8.58958e-09	1.48194e-74	0.0418307	1.578e-79	1.00101e-150	2.59945e-17	3.38259e-71	2.61057e-06	1.76996e-32	2.60774e-83
83	1.56616e-73	0.0426799	9.75042e-65	3.08695e-169	7.13625e-17	8.06875e-78	0.016484	3.04793e-29	2.42103e-89	4.09285e-132	1.15069e-10	8.96351e-14	2.86476e-58	1.25039e-46	1.07137e-62	1.72805e-115	2.39308e-46	3.97839e-75	0.0003889	2.17135e-06	2.60284e-74	0.0443677	1.20535e-83	4.1861e-143	3.5543e-21	3.75387e-70	7.47763e-07	5.73961e-38	2.0674e-73	3.18781e-150	7.55435e-08	4.35592e-26	2.26259e-53	5.05399e-38	1.07337e-32	2.00844e-132	3.56903e-47	5.96343e-62	7.12614e-06	1.49688e-08	6.90251e-74	0.0396131	7.64845e-79	7.46724e-150	5.81482e-17	1.53202e-70	4.08275e-06	5.23306e-32	1.30122e-82
84	7.18295e-73	0.0407957	4.14443e-64	2.48649e-168	1.57333e-16	3.83114e-77	0.0189915	8.52619e-29	1.25357e-88	2.75526e-131	2.13637e-10	1.8266e-13	1.14572e-57	4.42085e-46	4.46944e-62	1.05988e-114	8.43344e-46	1.84862e-74	0.000266641	3.40059e-06	1.20164e-73	0.044298	5.98719e-83	2.98345e-142	8.60684e-21	1.67375e-69	1.19744e-06	1.82353e-37	9.47401e-73	2.35294e-149	1.26398e-07	1.15614e-25	8.6134e-53	1.60688e-37	3.16697e-32	1.35465e-131	1.26992e-46	2.47092e-61	4.23967e-06	2.57664e-08	3.17597e-73	0.037049	3.66213e-78	5.50277e-149	1.28486e-16	6.85438e-70	6.30684e-06	1.52836e-31	6.41408e-82
85	3.25479e-72	0.0385181	1.74044e-63	1.97883e-167	3.42687e-16	1.79724e-76	0.021614	2.35637e-28	6.41291e-88	1.83258e-130	3.91844e-10	3.67733e-13	4.52712e-57	1.54423e-45	1.84212e-61	6.42274e-114	2.9363e-45	8.48677e-74	0.000180562	5.2612e-06	5.48094e-73	0.0436882	2.93825e-82	2.10083e-141	2.05904e-20	7.37316e-69	1.89431e-06	5.7238e-37	4.28941e-72	1.7159e-148	2.08927e-07	3.03165e-25	3.2396e-52	5.04749e-37	9.23163e-32	9.02726e-131	4.46422e-46	1.01152e-60	2.49113e-06	4.38158e-08	1.44378e-72	0.034227	1.7324e-77	4.00651e-148	2.8048e-16	3.02989e-69	9.62442e-06	4.40997e-31	3.12372e-81
86	1.45733e-71	0.0359281	7.22213e-63	1.55617e-166	7.37502e-16	8.33104e-76	0.0243025	6.43473e-28	3.24174e-87	1.20444e-129	7.10111e-10	7.31482e-13	1.76757e-56	5.32998e-45	7.50228e-61	3.84595e-113	1.01019e-44	3.84993e-73	0.000120781	8.04233e-06	2.4703e-72	0.0425665	1.42486e-81	1.4618e-140	4.86718e-20	3.20945e-68	2.96084e-06	1.77525e-36	1.919e-71	1.23651e-147	3.41208e-07	7.85491e-25	1.20398e-51	1.56664e-36	2.65897e-31	5.94439e-130	1.55069e-45	4.09166e-60	1.44579e-06	7.36175e-08	6.48542e-72	0.0312375	8.09802e-77	2.88254e-147	6.04971e-16	1.32342e-68	1.45111e-05	1.25731e-30	1.50323e-80
87	6.44859e-71	0.0331117	2.96172e-62	1.20945e-165	1.56846e-15	3.81651e-75	0.0270001	1.7365e-27	1.61949e-86	7.82329e-129	1.27168e-09	1.43786e-12	6.82023e-56	1.81804e-44	3.01954e-60	2.27597e-112	3.43455e-44	1.72598e-72	7.98182e-05	1.2148e-05	1.10032e-71	0.0409784	6.82854e-81	1.00523e-139	1.13695e-19	1.38064e-67	4.57303e-06	5.44123e-36	8.48448e-71	8.80613e-147	5.50646e-07	2.01122e-24	4.42193e-51	4.80537e-36	7.56845e-31	3.86848e-129	5.32313e-45	1.63567e-59	8.28926e-07	1.22226e-07	2.87904e-71	0.028168	3.74095e-76	2.04958e-146	1.28947e-15	5.71268e-68	2.16198e-05	3.54251e-30	7.1491e-80
88	2.82035e-70	0.0301554	1.20047e-61	9.29097e-165	3.29678e-15	1.72809e-74	0.0296439	4.63162e-27	7.99671e-86	5.02264e-128	2.25071e-09	2.79338e-12	2.60105e-55	6.12925e-44	1.2012e-59	1.33127e-111	1.15415e-43	7.64806e-72	5.21186e-05	1.81346e-05	4.84414e-71	0.0389835	3.23457e-80	6.83251e-139	2.62488e-19	5.87028e-67	6.98035e-06	1.64836e-35	3.70771e-70	6.19886e-146	8.78238e-07	5.08966e-24	1.60521e-50	1.45681e-35	2.1292e-30	2.48835e-128	1.80607e-44	6.46278e-59	4.69557e-07	2.00554e-07	1.26325e-70	0.0250996	1.70811e-75	1.44044e-145	2.71639e-15	2.43732e-67	3.18332e-05	9.8649e-30	3.36055e-79
89	1.21935e-69	0.0271418	4.80996e-61	7.05556e-164	6.84958e-15	7.73485e-74	0.0321675	1.22113e-26	3.90332e-85	3.18764e-127	3.93744e-09	5.36413e-12	9.80578e-55	2.04263e-43	4.72362e-59	7.69769e-111	3.83382e-43	3.35006e-71	3.363e-05	2.67578e-05	2.10815e-70	0.0366523	1.51459e-79	4.59084e-138	5.99024e-19	2.46731e-66	1.05315e-05	4.9361e-35	1.60167e-69	4.31355e-145	1.3845e-06	1.27317e-23	5.76011e-50	4.3657e-35	5.92105e-30	1.58225e-127	6.0573e-44	2.52421e-58	2.62832e-07	3.25271e-07	5.47915e-70	0.0221037	7.7097e-75	1.00073e-144	5.65629e-15	1.02794e-66	4.63282e-05	2.71548e-29	1.56155e-78
90	5.2119e-69	0.0241467	1.90534e-60	5.2973e-163	1.40687e-14	3.42279e-73	0.0345037	3.18286e-26	1.88366e-84	2.00012e-126	6.80946e-09	1.01831e-11	3.65471e-54	6.72984e-43	1.83643e-58	4.4005e-110	1.25903e-42	1.45076e-70	2.14466e-05	3.9029e-05	9.07043e-70	0.0340623	7.01155e-79	3.04967e-137	1.35144e-18	1.02524e-65	1.57071e-05	1.46132e-34	6.84039e-69	2.96762e-144	2.15761e-06	3.14851e-23	2.04346e-49	1.2934e-34	1.62782e-29	9.94694e-127	2.00844e-43	9.74701e-58	1.45391e-07	5.21504e-07	2.34952e-69	0.01924	3.44033e-74	6.87375e-144	1.16435e-14	4.28614e-66	6.66503e-05	7.38968e-29	7.17373e-78
91	2.20271e-68	0.0212363	7.46272e-60	3.93263e-162	2.857e-14	1.49763e-72	0.0365877	8.20262e-26	8.98808e-84	1.24093e-125	1.16431e-08	1.91126e-11	1.34684e-53	2.19234e-42	7.05936e-58	2.48739e-109	4.08817e-42	6.21206e-70	1.35189e-05	5.6282e-05	3.85877e-69	0.0312931	3.20945e-78	2.00317e-136	3.01455e-18	4.21236e-65	2.31606e-05	4.2775e-34	2.88857e-68	2.01876e-143	3.32432e-06	7.69843e-23	7.1679e-49	3.78877e-34	4.42484e-29	6.1831e-126	6.58453e-43	3.72142e-57	7.94923e-08	8.26653e-07	9.96186e-69	0.0165554	1.51795e-73	4.66845e-143	2.36975e-14	1.76708e-65	9.47987e-05	1.98831e-28	3.25859e-77
92	9.20593e-68	0.018465	2.89046e-59	2.88716e-161	5.73705e-14	6.48006e-72	0.0383598	2.09035e-25	4.24114e-83	7.61364e-125	1.96851e-08	3.54715e-11	4.9082e-53	7.0624e-42	2.6835e-57	1.3904e-108	1.31269e-41	2.63041e-69	8.42425e-06	8.02512e-05	1.62337e-68	0.0284237	1.45277e-77	1.30119e-135	6.64923e-18	1.71148e-64	3.37679e-05	1.23814e-33	1.20624e-67	1.35806e-142	5.0645e-06	1.86135e-22	2.48633e-48	1.09748e-33	1.18938e-28	3.80082e-125	2.13467e-42	1.40505e-56	4.29624e-08	1.29567e-06	4.17684e-68	0.0140839	6.62315e-73	3.1355e-142	4.76916e-14	7.20434e-65	0.000133321	5.29026e-28	1.46374e-76
93	3.80519e-67	0.0158754	1.10722e-58	2.09637e-160	1.1393e-13	2.77302e-71	0.0397688	5.26826e-25	1.97925e-82	4.62003e-124	3.29129e-08	6.51037e-11	1.76898e-52	2.25003e-41	1.00887e-56	7.68675e-108	4.16855e-41	1.10156e-68	5.1901e-06	0.000113158	6.75436e-68	0.0255282	6.50372e-77	8.35926e-135	1.45043e-17	6.87722e-64	4.86867e-05	3.54436e-33	4.98173e-67	9.03568e-142	7.62999e-06	4.45074e-22	8.52943e-48	3.14402e-33	3.16175e-28	2.31077e-124	6.84429e-42	5.24648e-56	2.29552e-08	2.00826e-06	1.73202e-67	0.0118469	2.85805e-72	2.08281e-141	9.49187e-14	2.90488e-64	0.000185415	1.39204e-27	6.50273e-76
94	1.55573e-66	0.0134975	4.19515e-58	1.50565e-159	2.23774e-13	1.17375e-70	0.0407739	1.31325e-24	9.13629e-82	2.77303e-123	5.44262e-08	1.18181e-10	6.30625e-52	7.0903e-41	3.75158e-56	4.20339e-107	1.30933e-40	4.56295e-68	3.16173e-06	0.000157804	2.77971e-67	0.0226735	2.87991e-76	5.31195e-134	3.1293e-17	2.7334e-63	6.94252e-05	1.00356e-32	2.03506e-66	5.94649e-141	1.13688e-05	1.05261e-21	2.89417e-47	8.90862e-33	8.31323e-28	1.3896e-123	2.17054e-41	1.93772e-55	1.21269e-08	3.07861e-06	7.10408e-67	0.00985449	1.2199e-71	1.36852e-140	1.86845e-13	1.15854e-63	0.000255028	3.62294e-27	2.85745e-75
95	6.29202e-66	0.0113497	1.57238e-57	1.06977e-158	4.34763e-13	4.91471e-70	0.0413471	3.23827e-24	4.17197e-81	1.64653e-122	8.90247e-08	2.12207e-10	2.22389e-51	2.2102e-40	1.38004e-55	2.27385e-106	4.06823e-40	1.86973e-67	1.90471e-06	0.00021767	1.13165e-66	0.019917	1.26152e-75	3.33923e-133	6.67843e-17	1.07471e-62	9.79209e-05	2.81083e-32	8.22377e-66	3.8714e-140	1.67557e-05	2.46254e-21	9.7145e-47	2.49702e-32	2.1622e-27	8.26668e-123	6.80921e-41	7.07961e-55	6.33505e-09	4.66814e-06	2.88243e-66	0.00810704	5.15082e-71	8.89522e-140	3.63817e-13	4.57076e-63	0.00034696	9.32724e-27	1.24211e-74
96	2.51764e-65	0.00943989	5.8306e-57	7.51992e-158	8.35631e-13	2.03595e-69	0.0414743	7.89964e-24	1.88478e-80	9.67254e-122	1.44053e-07	3.76952e-10	7.75885e-51	6.81615e-40	5.02238e-55	1.21696e-105	1.25055e-39	7.57986e-67	1.13485e-06	0.000297016	4.55798e-66	0.0173054	5.46711e-75	2.0768e-132	1.41002e-16	4.18045e-62	0.000136626	7.78864e-32	3.28784e-65	2.49362e-139	2.44293e-05	5.69934e-21	3.22595e-46	6.92418e-32	5.56356e-27	4.86548e-122	2.11332e-40	2.559e-54	3.27284e-09	7.00223e-06	1.15706e-65	0.00659686	2.15167e-70	5.7203e-139	7.00813e-13	1.78407e-62	0.000466945	2.37562e-26	5.34183e-74
97	9.96756e-65	0.00776688	2.13924e-56	5.23046e-157	1.58907e-12	8.3451e-69	0.0411559	1.90669e-23	8.42514e-80	5.62227e-121	2.30617e-07	6.62481e-10	2.67838e-50	2.07985e-39	1.80851e-54	6.44452e-105	3.80348e-39	3.04044e-66	6.68797e-07	0.000400964	1.81646e-65	0.0148745	2.34432e-74	1.27804e-131	2.9454e-16	1.60897e-61	0.000188597	2.13535e-31	1.3006e-64	1.58926e-138	3.52377e-05	1.30509e-20	1.05994e-45	1.89975e-31	1.41641e-26	2.83348e-121	6.4896e-40	9.15214e-54	1.67233e-09	1.03916e-05	4.59563e-65	0.00531013	8.89342e-70	3.63984e-138	1.33563e-12	6.89013e-62	0.00062172	5.98656e-26	2.27307e-73
98	3.90503e-64	0.00632223	7.76682e-56	3.60013e-156	2.99009e-12	3.38482e-68	0.0404063	4.55381e-23	3.7268e-79	3.23394e-120	3.65311e-07	1.15205e-09	9.14918e-50	6.27996e-39	6.44418e-54	3.37715e-104	1.14471e-38	1.20684e-65	3.89895e-07	0.000535577	7.16336e-65	0.0126489	9.94756e-74	7.78288e-131	6.08809e-16	6.12789e-61	0.00025759	5.79303e-31	5.09115e-64	1.00232e-137	5.02921e-05	2.95719e-20	3.44621e-45	5.15765e-31	3.56822e-26	1.63291e-120	1.97198e-39	3.239e-53	8.45255e-10	1.52589e-05	1.80623e-64	0.00422875	3.63749e-69	2.2919e-137	2.51873e-12	2.63318e-61	0.000819053	1.4928e-25	9.57144e-73
99	1.51407e-63	0.00509193	2.79068e-55	2.4524e-155	5.56778e-12	1.35871e-67	0.0392533	1.07631e-22	1.63148e-78	1.84096e-119	5.72641e-07	1.98253e-09	3.09296e-49	1.87654e-38	2.27246e-53	1.75147e-103	3.40945e-38	4.7408e-65	2.24875e-07	0.000707905	2.79572e-64	0.0106428	4.17736e-73	4.69062e-130	1.24532e-15	2.30971e-60	0.000348145	1.5553e-30	1.97229e-63	6.25627e-137	7.10284e-05	6.63106e-20	1.10887e-44	1.38574e-30	8.89576e-26	9.31318e-120	5.93015e-39	1.13444e-52	4.22637e-10	2.2172e-05	7.02564e-64	0.00333199	1.47238e-68	1.42824e-136	4.70039e-12	9.95903e-61	0.00106774	3.68381e-25	3.98866e-72
100	5.81024e-63	0.00405815	9.92439e-55	1.6535e-154	1.02608e-11	5.39816e-67	0.0377361	2.51777e-22	7.06905e-78	1.03727e-118	8.8837e-07	3.3765e-09	1.03488e-48	5.54987e-38	7.93147e-53	8.99061e-103	1.00507e-37	1.84324e-64	1.28328e-07	0.000925995	1.07994e-63	0.00886129	1.73628e-72	2.79807e-129	2.52107e-15	8.61653e-60	0.000465665	4.13277e-30	7.56235e-63	3.8651e-136	9.92771e-05	1.47162e-19	3.53136e-44	3.68491e-30	2.19498e-25	5.25738e-119	1.76502e-38	3.93257e-52	2.09077e-10	3.18842e-05	2.70475e-63	0.00259791	5.89883e-68	8.80935e-136	8.68134e-12	3.72805e-60	0.00137751	8.99717e-25	1.64515e-71
[truncated: 1,436 more rows]
[truncated: 12 more columns]

## Sheet: SCoC Proportion flat
Row	Column	Column1	SCoC Combo Proportion
AD	AD	AD+AD	0.155844
AD	AXD	AD+AXD	0.350649
AD	AXXD	AD+AXXD	0.298701
[truncated: 3,597 more rows]

## Sheet: SCoC Combo Proportion
77	AD	CD	DD	ED	FD	GD	HD	ID	KD	LD	MD	ND	PD	QD	RD	SD	TD	VD	WD	YD	AXD	CXD	DXD	EXD	FXD	GXD	HXD	IXD	KXD	LXD	MXD	NXD	PXD	QXD	RXD	SXD	TXD	VXD	WXD	YXD	AXXD	CXXD	DXXD	EXXD	FXXD	GXXD	HXXD	IXXD	KXXD
[truncated: 60 more rows]
[truncated: 11 more columns]

[truncated: 10 more sheets: SCoC Combo Counts, Uniprot with Protein Cleavages, Degra_Combo_R_Output, R Combo Input, R Single Input, Uniprot with Motif Freq., Sample Table, Peptide Table, N-terminus Table, Protein Table]
